# Supplementary material for: Reference ranges for body composition indices by dual energy X-ray absorptiometry from the Bone Mineral Density in Childhood Study Cohort
Source: PubMed Central journal article supplement — Am J Clin Nutr. 2023 Aug 19;118(4):792–803. doi: 10.1016/j.ajcnut.2023.08.006 (PMC10579045; doi:10.1016/j.ajcnut.2023.08.006), 2023-08-19
Supplement: mmc1.pdf [file mmc1.pdf]

**Reference Ranges for Body Composition Indices by Dual Energy X-ray  
Absorptiometry from the Bone Mineral Density in Childhood Study Cohort  
Babette S. Zemel**

**Table of Contents for Supplementary Materials**

**Supplementary Figure 1.**

**Supplementary Tables:**

**Supplementary Table 1. List of Inclusion and Exclusion Criteria**

**Supplementary Tables 2 to 8: Extended tables with LMS values and reference percentiles for each decimal age year (for entire cohort):**

- Supplementary Table 2. Appendicular LSTM Index
- Supplementary Table 3. FMI
- Supplementary Table 4. Total LSTM Index
- Supplementary Table 5. Subtotal LSTM Index
- Supplementary Table 6. Total LSTM
- Supplementary Table 7. Subtotal LSTM
- Supplementary Table 8. Appendicular LSTM
- Supplementary Table 9. Leg LSTM
- Supplementary Table 10. FM

**Supplementary tables 11 to 15: Abbreviated tables with LMS Values and reference percentiles for whole year age groups with HAZ prediction equations (for entire cohort):**

- Supplementary Table 11. Total LSTM
- Supplementary Table 12. Subtotal LSTM
- Supplementary Table 13. Appendicular LSTM
- Supplementary Table 14. Leg LSTM
- Supplementary Table 15. FM

**Supplementary Tables for 16 to 24: Abbreviated tables with LMS values and reference percentiles for each whole year age group (for Black and Non-Black Groups)**

- Supplementary Table 16. Appendicular LSTM Index
- Supplementary Table 17. FMI

- Supplementary Table 18. Total LSTM Index
- Supplementary Table 19. Subtotal LSTM Index
- Supplementary Table 20. Total LSTM – with HAZ prediction equations
- Supplementary Table 21. Subtotal LSTM – with HAZ prediction equations
- Supplementary Table 22. Appendicular LSTM – with HAZ prediction equations
- Supplementary Table 23. leg LSTM – with HAZ prediction equations
- Supplementary Table 24. FM – with HAZ prediction equations

**Supplementary Tables 25 to 33: Extended tables with LMS values and reference percentiles for each decimal age year (for Black and Non-Black Groups)**

- Supplementary Table 25. appendicular LSTM Index
- Supplementary Table 26. FMI
- Supplementary Table 27. Total LSTM Index
- Supplementary Table 28. Subtotal LSTM Index
- Supplementary Table 29. Total LSTM
- Supplementary Table 30. Subtotal LSTM
- Supplementary Table 31. Appendicular LSTM
- Supplementary Table 32. Leg LSTM
- Supplementary Table 33. FM

## Supplementary Figure 1.

Mean Z-scores by Self-Identified Race and Ethnicity using Reference Ranges for African American and Non-African American Youth

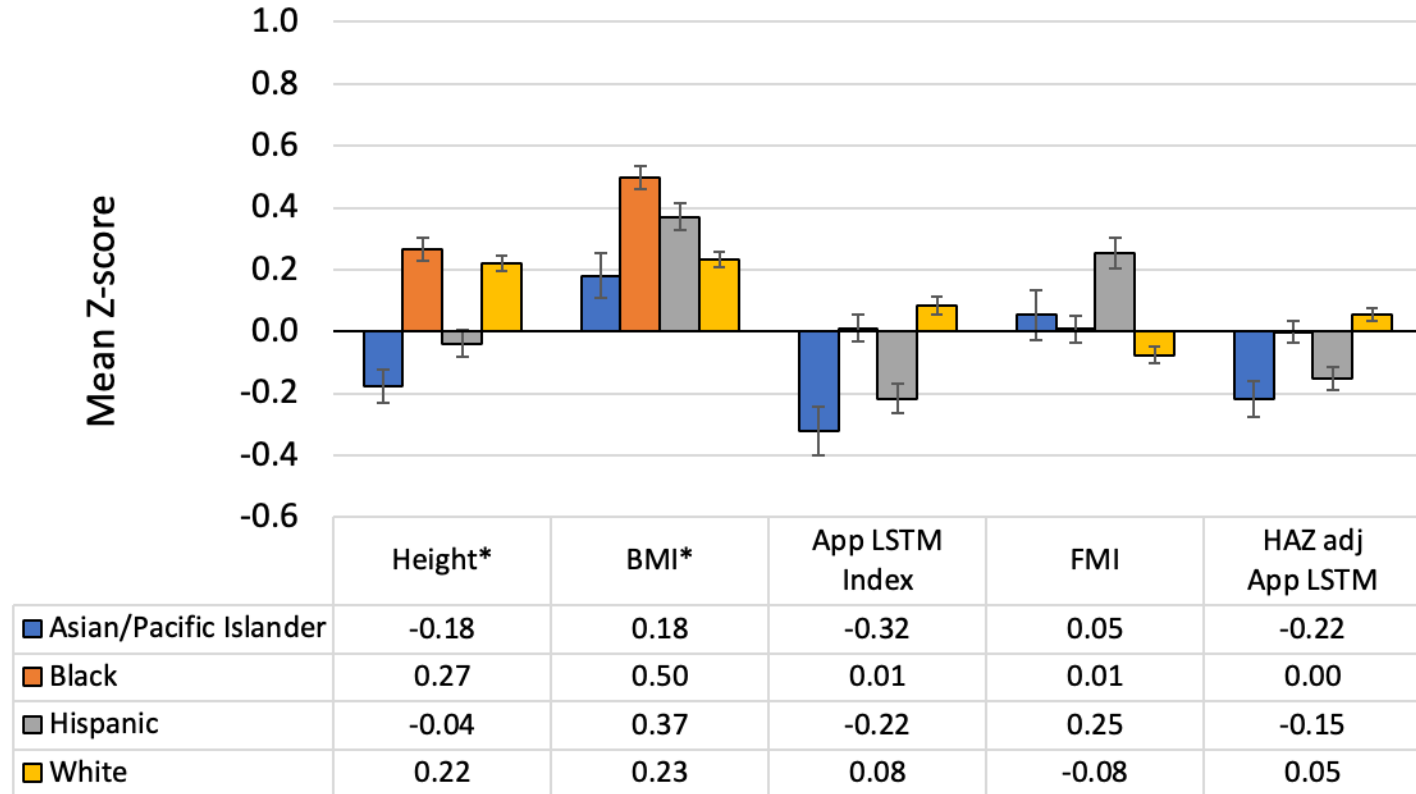

\* Z-scores calculated using the CDC 2000 reference. Error bars denote 95% Confidence Interval

**Supplemental Figure 1.** Mean Z-scores by self-identified race and ethnicity groups for appendicular lean soft tissue mass index and HAZ-adjusted appendicular lean soft tissue mass using reference ranges for black and non-black self-identified race. Note that height and BMI Z-scores were calculated using the CDC 2000 reference.

## Supplemental Table 1. List of Inclusion and Exclusion Criteria

### Inclusion Criteria

- A. Age from six years to sixteen years for first recruitment wave, ages 5 and 19 years for second recruitment wave
- B. Residence in USA for three years or more.
- C. Birth history:  $\geq 37$  weeks gestation. Birth weight  $\geq 5$  pounds.
- D. Height, weight, and BMI:  $\geq 3\%$  and  $\leq 97\%$  for sex and age<sup>26</sup>.
- E. Normal developmental history: grossly normal milestones with school placement within one year of expected for chronological age.
- F. If secondary sexual characteristics present or pubertal milestones achieved at time of enrollment, normal timing based on:

| Girls:                                                                                                    | Boys:                                            |
|-----------------------------------------------------------------------------------------------------------|--------------------------------------------------|
| Breast development: $\geq 8$ yr and $\leq 13$ yr                                                          | Testes $\geq 4$ cc: $\geq 9$ yr and $\leq 14$ yr |
| Menarche: $\geq 10$ yr and $< 16$ yr                                                                      | Pubic hair $\geq 9$ yr                           |
| Pubic hair: African American or Hispanic $\geq 7$ yr, Non-Hispanic, White or other background $\geq 8$ yr |                                                  |

### Exclusion Criteria

- A. History of medical or surgical disorder resulting in period of illness or recuperation that interrupted usual physical activity and/or dietary intake for:
  - One month or more in the two years prior to enrollment
  - One week or more of hospitalization, or two weeks or more of bed rest, in the six months prior to enrollment.
- B. Current or previous chronic medical condition known to affect growth and maturation requiring medical follow-up beyond usual well childcare, and/or affecting or limiting activities or dietary intake.
- C. Current or previous chronic medication that might affect growth, appetite, or bone mineral accrual including:
  - Glucocorticoids with cumulative exposure in the two years prior to enrollment of:
    - Parental: 1 wk or more
    - Oral, inhaled or nasal: 6 wk or more
    - If exposure is below these cumulative cutoffs, to be without steroid use for six months prior to enrollment.
  - Other medications or treatments:
    - Testosterone or anabolic steroid (past or present)

- Depro-Provera (Medroxyprogesterone acetate injectable)
  - Growth hormone (past or present)
  - Anticonvulsants
  - Isotretinoin (Accutane)
  - Methylphenidate or other stimulants used for ADHD in the 2 years prior to enrollment.
  - Gonadotropin Inhibitors: leuprolide acetate (Lupron), nafarelin acetate (Synarel), gosarelin acetate (Zoladex) (past or present)
  - Current or past treatment for an endocrine disorder, including diabetes mellitus or insipidus; thyroid, parathyroid, adrenal, gonadal, or pituitary hormone, or metabolic bone disorders.
- D. Genetic or dysmorphic syndromes
- E. Conditions possibly associated with abnormal bone size or shape including:
- Scoliosis: curve  $\geq 20$  degrees
  - Kyphosis: by history or apparent at initial visit
  - Skeletal dysplasia
  - Hardware (indwelling metal pins, rods, staples or other radiopaque material except orthodontia and piercings above the neck)
  - Deformity from fracture
- F. History of low-impact fractures defined as occurring with a fall from a height not greater than subject's stature:
- Age  $\leq 10$  years: two fractures or more
  - Age  $> 10$  years: three fractures or more
- G. Secondary amenorrhea defined as no menses for at least 6 months during or after the third post-menarcheal year
- H. Current pregnancy, or prior pregnancy lasting to 3<sup>rd</sup> trimester or more (if history available)
- I. Anticipated move out of the geographic area of within the study period.
- J. Same sex biological sibling or half-sibling enrolled in the BMDCS  
Participant in a diet or exercise intervention study (current or in the previous year)

**Table S2. Appendicular Lean Soft Tissue Mass Index, kg/m<sup>2</sup>**

| Age, y | Females |       |       |       |          |       |       | Males  |       |       |       |          |       |       |
|--------|---------|-------|-------|-------|----------|-------|-------|--------|-------|-------|-------|----------|-------|-------|
|        | L       | S     | -2 SD | -1 SD | 0 SD (M) | 1 SD  | 2 SD  | L      | S     | -2 SD | -1 SD | 0 SD (M) | 1 SD  | 2 SD  |
| 5.0    | 1.027   | 0.119 | 3.101 | 3.589 | 4.075    | 4.560 | 5.043 | -0.069 | 0.115 | 3.521 | 3.946 | 4.426    | 4.970 | 5.586 |
| 5.1    | 1.015   | 0.119 | 3.121 | 3.611 | 4.101    | 4.589 | 5.077 | -0.070 | 0.116 | 3.539 | 3.967 | 4.451    | 4.998 | 5.618 |
| 5.2    | 1.003   | 0.119 | 3.141 | 3.634 | 4.126    | 4.619 | 5.112 | -0.070 | 0.116 | 3.558 | 3.989 | 4.476    | 5.027 | 5.651 |
| 5.3    | 0.991   | 0.120 | 3.160 | 3.656 | 4.152    | 4.649 | 5.146 | -0.071 | 0.116 | 3.577 | 4.010 | 4.500    | 5.055 | 5.683 |
| 5.4    | 0.979   | 0.120 | 3.180 | 3.678 | 4.178    | 4.678 | 5.180 | -0.071 | 0.116 | 3.596 | 4.032 | 4.525    | 5.083 | 5.716 |
| 5.5    | 0.967   | 0.120 | 3.200 | 3.700 | 4.203    | 4.708 | 5.215 | -0.072 | 0.116 | 3.615 | 4.053 | 4.550    | 5.112 | 5.749 |
| 5.6    | 0.955   | 0.120 | 3.220 | 3.723 | 4.229    | 4.738 | 5.249 | -0.072 | 0.116 | 3.633 | 4.075 | 4.574    | 5.140 | 5.781 |
| 5.7    | 0.943   | 0.120 | 3.239 | 3.745 | 4.254    | 4.767 | 5.283 | -0.073 | 0.116 | 3.652 | 4.097 | 4.599    | 5.169 | 5.814 |
| 5.8    | 0.931   | 0.120 | 3.259 | 3.767 | 4.280    | 4.797 | 5.318 | -0.073 | 0.116 | 3.671 | 4.118 | 4.624    | 5.197 | 5.847 |
| 5.9    | 0.919   | 0.120 | 3.279 | 3.789 | 4.305    | 4.827 | 5.352 | -0.074 | 0.116 | 3.690 | 4.140 | 4.649    | 5.226 | 5.880 |
| 6.0    | 0.907   | 0.121 | 3.298 | 3.811 | 4.331    | 4.856 | 5.387 | -0.074 | 0.117 | 3.709 | 4.161 | 4.674    | 5.254 | 5.913 |
| 6.1    | 0.895   | 0.121 | 3.318 | 3.833 | 4.356    | 4.886 | 5.421 | -0.075 | 0.117 | 3.728 | 4.183 | 4.699    | 5.283 | 5.946 |
| 6.2    | 0.883   | 0.121 | 3.338 | 3.855 | 4.382    | 4.915 | 5.456 | -0.075 | 0.117 | 3.747 | 4.205 | 4.723    | 5.312 | 5.979 |
| 6.3    | 0.871   | 0.121 | 3.357 | 3.877 | 4.407    | 4.945 | 5.490 | -0.076 | 0.117 | 3.766 | 4.226 | 4.748    | 5.340 | 6.012 |
| 6.4    | 0.859   | 0.121 | 3.377 | 3.899 | 4.432    | 4.974 | 5.525 | -0.076 | 0.117 | 3.785 | 4.248 | 4.773    | 5.369 | 6.045 |
| 6.5    | 0.847   | 0.121 | 3.396 | 3.921 | 4.458    | 5.004 | 5.559 | -0.077 | 0.117 | 3.804 | 4.270 | 4.798    | 5.398 | 6.079 |
| 6.6    | 0.835   | 0.122 | 3.416 | 3.943 | 4.483    | 5.033 | 5.594 | -0.077 | 0.117 | 3.823 | 4.292 | 4.823    | 5.427 | 6.112 |
| 6.7    | 0.823   | 0.122 | 3.435 | 3.965 | 4.508    | 5.063 | 5.628 | -0.078 | 0.117 | 3.841 | 4.313 | 4.848    | 5.455 | 6.145 |
| 6.8    | 0.811   | 0.122 | 3.455 | 3.987 | 4.533    | 5.092 | 5.663 | -0.078 | 0.118 | 3.860 | 4.335 | 4.873    | 5.484 | 6.178 |
| 6.9    | 0.799   | 0.122 | 3.474 | 4.009 | 4.559    | 5.122 | 5.698 | -0.079 | 0.118 | 3.879 | 4.357 | 4.898    | 5.513 | 6.212 |
| 7.0    | 0.787   | 0.122 | 3.494 | 4.031 | 4.584    | 5.151 | 5.732 | -0.079 | 0.118 | 3.898 | 4.378 | 4.923    | 5.542 | 6.245 |
| 7.1    | 0.775   | 0.122 | 3.514 | 4.053 | 4.609    | 5.181 | 5.767 | -0.080 | 0.118 | 3.917 | 4.400 | 4.948    | 5.571 | 6.278 |
| 7.2    | 0.763   | 0.123 | 3.533 | 4.075 | 4.635    | 5.211 | 5.802 | -0.080 | 0.118 | 3.936 | 4.422 | 4.973    | 5.599 | 6.312 |
| 7.3    | 0.751   | 0.123 | 3.553 | 4.097 | 4.660    | 5.240 | 5.837 | -0.081 | 0.118 | 3.955 | 4.443 | 4.998    | 5.628 | 6.345 |
| 7.4    | 0.739   | 0.123 | 3.573 | 4.119 | 4.685    | 5.270 | 5.872 | -0.081 | 0.118 | 3.974 | 4.465 | 5.023    | 5.657 | 6.378 |
| 7.5    | 0.727   | 0.123 | 3.592 | 4.141 | 4.711    | 5.300 | 5.908 | -0.082 | 0.118 | 3.992 | 4.486 | 5.048    | 5.685 | 6.411 |
| 7.6    | 0.715   | 0.123 | 3.612 | 4.164 | 4.737    | 5.330 | 5.943 | -0.082 | 0.119 | 4.011 | 4.508 | 5.072    | 5.714 | 6.444 |
| 7.7    | 0.703   | 0.123 | 3.632 | 4.186 | 4.762    | 5.360 | 5.979 | -0.083 | 0.119 | 4.029 | 4.529 | 5.097    | 5.743 | 6.478 |
| 7.8    | 0.691   | 0.123 | 3.652 | 4.208 | 4.788    | 5.391 | 6.015 | -0.083 | 0.119 | 4.048 | 4.551 | 5.122    | 5.771 | 6.511 |
| 7.9    | 0.679   | 0.124 | 3.672 | 4.231 | 4.814    | 5.421 | 6.051 | -0.084 | 0.119 | 4.066 | 4.572 | 5.146    | 5.799 | 6.544 |
| 8.0    | 0.667   | 0.124 | 3.693 | 4.254 | 4.840    | 5.452 | 6.087 | -0.084 | 0.119 | 4.085 | 4.593 | 5.171    | 5.828 | 6.576 |
| 8.1    | 0.655   | 0.124 | 3.713 | 4.276 | 4.867    | 5.483 | 6.123 | -0.085 | 0.119 | 4.103 | 4.614 | 5.195    | 5.856 | 6.609 |
| 8.2    | 0.643   | 0.124 | 3.734 | 4.299 | 4.893    | 5.514 | 6.160 | -0.085 | 0.119 | 4.122 | 4.636 | 5.220    | 5.885 | 6.642 |
| 8.3    | 0.631   | 0.124 | 3.754 | 4.323 | 4.920    | 5.545 | 6.197 | -0.086 | 0.119 | 4.140 | 4.657 | 5.244    | 5.913 | 6.675 |
| 8.4    | 0.619   | 0.124 | 3.775 | 4.346 | 4.947    | 5.576 | 6.234 | -0.086 | 0.120 | 4.159 | 4.678 | 5.269    | 5.942 | 6.709 |
| 8.5    | 0.607   | 0.125 | 3.796 | 4.369 | 4.974    | 5.608 | 6.272 | -0.087 | 0.120 | 4.177 | 4.699 | 5.293    | 5.970 | 6.742 |
| 8.6    | 0.595   | 0.125 | 3.818 | 4.393 | 5.001    | 5.640 | 6.310 | -0.087 | 0.120 | 4.196 | 4.721 | 5.318    | 5.999 | 6.775 |
| 8.7    | 0.583   | 0.125 | 3.839 | 4.417 | 5.028    | 5.672 | 6.348 | -0.088 | 0.120 | 4.214 | 4.742 | 5.343    | 6.027 | 6.808 |
| 8.8    | 0.571   | 0.125 | 3.861 | 4.441 | 5.056    | 5.705 | 6.387 | -0.088 | 0.120 | 4.233 | 4.764 | 5.368    | 6.056 | 6.842 |
| 8.9    | 0.559   | 0.125 | 3.883 | 4.466 | 5.084    | 5.738 | 6.426 | -0.089 | 0.120 | 4.251 | 4.785 | 5.393    | 6.085 | 6.876 |
| 9.0    | 0.547   | 0.125 | 3.905 | 4.490 | 5.112    | 5.771 | 6.465 | -0.089 | 0.120 | 4.270 | 4.807 | 5.418    | 6.115 | 6.910 |
| 9.1    | 0.535   | 0.125 | 3.927 | 4.515 | 5.141    | 5.804 | 6.505 | -0.090 | 0.120 | 4.289 | 4.829 | 5.443    | 6.144 | 6.944 |
| 9.2    | 0.523   | 0.126 | 3.950 | 4.540 | 5.170    | 5.838 | 6.545 | -0.090 | 0.121 | 4.308 | 4.851 | 5.469    | 6.174 | 6.979 |
| 9.3    | 0.511   | 0.126 | 3.973 | 4.566 | 5.199    | 5.872 | 6.585 | -0.091 | 0.121 | 4.328 | 4.873 | 5.495    | 6.204 | 7.014 |
| 9.4    | 0.499   | 0.126 | 3.996 | 4.591 | 5.228    | 5.906 | 6.626 | -0.091 | 0.121 | 4.347 | 4.896 | 5.521    | 6.234 | 7.049 |
| 9.5    | 0.487   | 0.126 | 4.019 | 4.617 | 5.258    | 5.941 | 6.667 | -0.092 | 0.121 | 4.367 | 4.919 | 5.547    | 6.265 | 7.085 |
| 9.6    | 0.475   | 0.126 | 4.043 | 4.643 | 5.287    | 5.976 | 6.708 | -0.092 | 0.121 | 4.387 | 4.942 | 5.574    | 6.296 | 7.121 |
| 9.7    | 0.463   | 0.126 | 4.066 | 4.669 | 5.317    | 6.011 | 6.750 | -0.093 | 0.121 | 4.407 | 4.965 | 5.601    | 6.327 | 7.158 |
| 9.8    | 0.451   | 0.126 | 4.090 | 4.696 | 5.348    | 6.046 | 6.792 | -0.093 | 0.121 | 4.428 | 4.989 | 5.629    | 6.359 | 7.195 |
| 9.9    | 0.439   | 0.126 | 4.114 | 4.723 | 5.378    | 6.082 | 6.834 | -0.094 | 0.121 | 4.449 | 5.013 | 5.657    | 6.392 | 7.233 |
| 10.0   | 0.427   | 0.126 | 4.139 | 4.750 | 5.409    | 6.118 | 6.877 | -0.094 | 0.122 | 4.470 | 5.038 | 5.685    | 6.425 | 7.271 |
| 10.1   | 0.415   | 0.127 | 4.163 | 4.777 | 5.440    | 6.154 | 6.920 | -0.095 | 0.122 | 4.491 | 5.062 | 5.714    | 6.458 | 7.310 |
| 10.2   | 0.403   | 0.127 | 4.188 | 4.804 | 5.471    | 6.190 | 6.963 | -0.095 | 0.122 | 4.513 | 5.088 | 5.743    | 6.492 | 7.350 |
| 10.3   | 0.391   | 0.127 | 4.213 | 4.831 | 5.502    | 6.226 | 7.006 | -0.096 | 0.122 | 4.536 | 5.114 | 5.773    | 6.527 | 7.390 |
| 10.4   | 0.379   | 0.127 | 4.238 | 4.859 | 5.533    | 6.263 | 7.049 | -0.096 | 0.122 | 4.558 | 5.140 | 5.803    | 6.562 | 7.431 |
| 10.5   | 0.367   | 0.127 | 4.263 | 4.886 | 5.565    | 6.299 | 7.093 | -0.097 | 0.122 | 4.582 | 5.167 | 5.835    | 6.598 | 7.473 |
| 10.6   | 0.355   | 0.127 | 4.288 | 4.914 | 5.596    | 6.336 | 7.137 | -0.097 | 0.122 | 4.605 | 5.194 | 5.866    | 6.635 | 7.516 |
| 10.7   | 0.343   | 0.127 | 4.313 | 4.942 | 5.627    | 6.373 | 7.180 | -0.098 | 0.123 | 4.630 | 5.222 | 5.898    | 6.672 | 7.559 |

**Table S2. Appendicular Lean Soft Tissue Mass Index, kg/m<sup>2</sup>**

| Age, y | Females |       |       |       |          |       |       | Males  |       |       |       |          |       |        |
|--------|---------|-------|-------|-------|----------|-------|-------|--------|-------|-------|-------|----------|-------|--------|
|        | L       | S     | -2 SD | -1 SD | 0 SD (M) | 1 SD  | 2 SD  | L      | S     | -2 SD | -1 SD | 0 SD (M) | 1 SD  | 2 SD   |
| 10.8   | 0.332   | 0.127 | 4.338 | 4.969 | 5.659    | 6.409 | 7.224 | -0.098 | 0.123 | 4.654 | 5.250 | 5.931    | 6.711 | 7.604  |
| 10.9   | 0.320   | 0.127 | 4.364 | 4.997 | 5.690    | 6.446 | 7.267 | -0.099 | 0.123 | 4.680 | 5.279 | 5.965    | 6.750 | 7.649  |
| 11.0   | 0.308   | 0.127 | 4.389 | 5.024 | 5.721    | 6.482 | 7.311 | -0.099 | 0.123 | 4.705 | 5.309 | 5.999    | 6.789 | 7.695  |
| 11.1   | 0.296   | 0.127 | 4.414 | 5.052 | 5.752    | 6.518 | 7.354 | -0.100 | 0.123 | 4.732 | 5.340 | 6.034    | 6.830 | 7.743  |
| 11.2   | 0.284   | 0.127 | 4.439 | 5.079 | 5.783    | 6.554 | 7.397 | -0.101 | 0.123 | 4.759 | 5.370 | 6.070    | 6.871 | 7.791  |
| 11.3   | 0.272   | 0.128 | 4.464 | 5.106 | 5.814    | 6.590 | 7.440 | -0.101 | 0.123 | 4.786 | 5.402 | 6.107    | 6.914 | 7.840  |
| 11.4   | 0.260   | 0.128 | 4.488 | 5.133 | 5.844    | 6.626 | 7.482 | -0.102 | 0.123 | 4.814 | 5.434 | 6.144    | 6.957 | 7.890  |
| 11.5   | 0.248   | 0.128 | 4.513 | 5.160 | 5.874    | 6.661 | 7.524 | -0.102 | 0.124 | 4.843 | 5.467 | 6.182    | 7.001 | 7.941  |
| 11.6   | 0.236   | 0.128 | 4.537 | 5.186 | 5.904    | 6.696 | 7.566 | -0.103 | 0.124 | 4.872 | 5.501 | 6.221    | 7.046 | 7.993  |
| 11.7   | 0.224   | 0.128 | 4.561 | 5.212 | 5.933    | 6.730 | 7.607 | -0.103 | 0.124 | 4.902 | 5.535 | 6.260    | 7.092 | 8.046  |
| 11.8   | 0.212   | 0.128 | 4.585 | 5.238 | 5.962    | 6.764 | 7.647 | -0.104 | 0.124 | 4.932 | 5.570 | 6.301    | 7.138 | 8.100  |
| 11.9   | 0.200   | 0.128 | 4.608 | 5.263 | 5.991    | 6.797 | 7.687 | -0.104 | 0.124 | 4.963 | 5.606 | 6.342    | 7.186 | 8.155  |
| 12.0   | 0.188   | 0.128 | 4.631 | 5.288 | 6.019    | 6.830 | 7.727 | -0.105 | 0.124 | 4.995 | 5.642 | 6.383    | 7.234 | 8.211  |
| 12.1   | 0.176   | 0.128 | 4.654 | 5.312 | 6.046    | 6.862 | 7.766 | -0.105 | 0.124 | 5.027 | 5.679 | 6.426    | 7.282 | 8.267  |
| 12.2   | 0.164   | 0.128 | 4.676 | 5.336 | 6.073    | 6.893 | 7.804 | -0.106 | 0.124 | 5.059 | 5.716 | 6.468    | 7.332 | 8.325  |
| 12.3   | 0.152   | 0.128 | 4.698 | 5.360 | 6.100    | 6.924 | 7.841 | -0.106 | 0.125 | 5.092 | 5.754 | 6.512    | 7.382 | 8.383  |
| 12.4   | 0.140   | 0.128 | 4.719 | 5.383 | 6.125    | 6.954 | 7.878 | -0.107 | 0.125 | 5.126 | 5.792 | 6.556    | 7.433 | 8.442  |
| 12.5   | 0.128   | 0.128 | 4.740 | 5.405 | 6.151    | 6.984 | 7.914 | -0.107 | 0.125 | 5.159 | 5.831 | 6.601    | 7.484 | 8.501  |
| 12.6   | 0.116   | 0.128 | 4.760 | 5.427 | 6.175    | 7.013 | 7.949 | -0.108 | 0.125 | 5.194 | 5.870 | 6.646    | 7.536 | 8.561  |
| 12.7   | 0.104   | 0.128 | 4.780 | 5.448 | 6.199    | 7.041 | 7.984 | -0.108 | 0.125 | 5.228 | 5.910 | 6.691    | 7.589 | 8.622  |
| 12.8   | 0.092   | 0.128 | 4.800 | 5.469 | 6.222    | 7.068 | 8.018 | -0.109 | 0.125 | 5.263 | 5.950 | 6.737    | 7.642 | 8.683  |
| 12.9   | 0.080   | 0.128 | 4.819 | 5.489 | 6.245    | 7.095 | 8.051 | -0.109 | 0.125 | 5.298 | 5.990 | 6.783    | 7.695 | 8.744  |
| 13.0   | 0.068   | 0.128 | 4.837 | 5.509 | 6.267    | 7.121 | 8.083 | -0.110 | 0.125 | 5.334 | 6.030 | 6.830    | 7.748 | 8.806  |
| 13.1   | 0.056   | 0.128 | 4.855 | 5.528 | 6.288    | 7.146 | 8.114 | -0.110 | 0.125 | 5.369 | 6.071 | 6.876    | 7.802 | 8.868  |
| 13.2   | 0.044   | 0.128 | 4.872 | 5.546 | 6.308    | 7.170 | 8.144 | -0.111 | 0.126 | 5.405 | 6.112 | 6.923    | 7.856 | 8.930  |
| 13.3   | 0.032   | 0.128 | 4.889 | 5.564 | 6.328    | 7.194 | 8.174 | -0.111 | 0.126 | 5.441 | 6.153 | 6.970    | 7.910 | 8.993  |
| 13.4   | 0.020   | 0.129 | 4.905 | 5.581 | 6.347    | 7.217 | 8.203 | -0.112 | 0.126 | 5.476 | 6.194 | 7.017    | 7.964 | 9.055  |
| 13.5   | 0.008   | 0.129 | 4.921 | 5.597 | 6.366    | 7.239 | 8.231 | -0.112 | 0.126 | 5.512 | 6.235 | 7.064    | 8.018 | 9.117  |
| 13.6   | -0.004  | 0.129 | 4.936 | 5.613 | 6.384    | 7.260 | 8.258 | -0.113 | 0.126 | 5.548 | 6.276 | 7.111    | 8.072 | 9.179  |
| 13.7   | -0.016  | 0.129 | 4.951 | 5.629 | 6.401    | 7.281 | 8.284 | -0.113 | 0.126 | 5.584 | 6.316 | 7.158    | 8.125 | 9.241  |
| 13.8   | -0.028  | 0.129 | 4.965 | 5.643 | 6.417    | 7.301 | 8.310 | -0.114 | 0.126 | 5.619 | 6.357 | 7.204    | 8.179 | 9.302  |
| 13.9   | -0.040  | 0.129 | 4.979 | 5.658 | 6.433    | 7.320 | 8.335 | -0.114 | 0.126 | 5.655 | 6.397 | 7.250    | 8.232 | 9.364  |
| 14.0   | -0.052  | 0.129 | 4.992 | 5.671 | 6.449    | 7.339 | 8.359 | -0.115 | 0.126 | 5.690 | 6.437 | 7.296    | 8.284 | 9.424  |
| 14.1   | -0.064  | 0.129 | 5.004 | 5.684 | 6.463    | 7.357 | 8.383 | -0.115 | 0.126 | 5.725 | 6.477 | 7.342    | 8.337 | 9.484  |
| 14.2   | -0.076  | 0.129 | 5.017 | 5.697 | 6.477    | 7.374 | 8.406 | -0.116 | 0.126 | 5.759 | 6.516 | 7.387    | 8.388 | 9.544  |
| 14.3   | -0.088  | 0.129 | 5.028 | 5.709 | 6.491    | 7.390 | 8.428 | -0.116 | 0.126 | 5.793 | 6.555 | 7.431    | 8.439 | 9.603  |
| 14.4   | -0.100  | 0.129 | 5.039 | 5.720 | 6.503    | 7.406 | 8.449 | -0.117 | 0.126 | 5.827 | 6.594 | 7.475    | 8.490 | 9.661  |
| 14.5   | -0.112  | 0.129 | 5.050 | 5.731 | 6.516    | 7.422 | 8.470 | -0.117 | 0.126 | 5.860 | 6.632 | 7.518    | 8.539 | 9.718  |
| 14.6   | -0.124  | 0.129 | 5.060 | 5.741 | 6.527    | 7.436 | 8.490 | -0.118 | 0.126 | 5.893 | 6.669 | 7.561    | 8.588 | 9.774  |
| 14.7   | -0.136  | 0.129 | 5.070 | 5.751 | 6.538    | 7.450 | 8.509 | -0.118 | 0.126 | 5.925 | 6.706 | 7.603    | 8.636 | 9.829  |
| 14.8   | -0.148  | 0.129 | 5.079 | 5.761 | 6.549    | 7.464 | 8.528 | -0.119 | 0.127 | 5.957 | 6.742 | 7.644    | 8.683 | 9.883  |
| 14.9   | -0.160  | 0.130 | 5.088 | 5.770 | 6.559    | 7.477 | 8.546 | -0.119 | 0.127 | 5.988 | 6.777 | 7.684    | 8.729 | 9.937  |
| 15.0   | -0.172  | 0.130 | 5.097 | 5.778 | 6.569    | 7.489 | 8.564 | -0.120 | 0.127 | 6.018 | 6.811 | 7.724    | 8.775 | 9.989  |
| 15.1   | -0.184  | 0.130 | 5.105 | 5.786 | 6.578    | 7.501 | 8.581 | -0.120 | 0.127 | 6.048 | 6.845 | 7.762    | 8.819 | 10.039 |
| 15.2   | -0.196  | 0.130 | 5.113 | 5.794 | 6.586    | 7.512 | 8.598 | -0.121 | 0.127 | 6.077 | 6.878 | 7.800    | 8.862 | 10.089 |
| 15.3   | -0.208  | 0.130 | 5.120 | 5.801 | 6.594    | 7.523 | 8.614 | -0.121 | 0.127 | 6.105 | 6.910 | 7.837    | 8.904 | 10.138 |
| 15.4   | -0.220  | 0.130 | 5.127 | 5.808 | 6.602    | 7.533 | 8.630 | -0.122 | 0.127 | 6.133 | 6.942 | 7.872    | 8.945 | 10.185 |
| 15.5   | -0.232  | 0.130 | 5.133 | 5.814 | 6.609    | 7.543 | 8.645 | -0.122 | 0.127 | 6.160 | 6.972 | 7.907    | 8.985 | 10.230 |
| 15.6   | -0.244  | 0.130 | 5.140 | 5.820 | 6.616    | 7.552 | 8.660 | -0.123 | 0.127 | 6.186 | 7.002 | 7.941    | 9.024 | 10.275 |
| 15.7   | -0.256  | 0.130 | 5.145 | 5.826 | 6.623    | 7.561 | 8.674 | -0.123 | 0.127 | 6.211 | 7.031 | 7.974    | 9.061 | 10.318 |
| 15.8   | -0.268  | 0.130 | 5.151 | 5.831 | 6.629    | 7.570 | 8.688 | -0.124 | 0.127 | 6.236 | 7.059 | 8.006    | 9.098 | 10.360 |
| 15.9   | -0.280  | 0.131 | 5.156 | 5.836 | 6.634    | 7.578 | 8.701 | -0.124 | 0.127 | 6.260 | 7.086 | 8.036    | 9.133 | 10.401 |
| 16.0   | -0.292  | 0.131 | 5.161 | 5.840 | 6.640    | 7.586 | 8.714 | -0.125 | 0.127 | 6.283 | 7.112 | 8.066    | 9.167 | 10.440 |
| 16.1   | -0.304  | 0.131 | 5.166 | 5.845 | 6.645    | 7.594 | 8.727 | -0.125 | 0.127 | 6.305 | 7.137 | 8.095    | 9.200 | 10.478 |
| 16.2   | -0.316  | 0.131 | 5.170 | 5.849 | 6.649    | 7.601 | 8.740 | -0.126 | 0.127 | 6.327 | 7.162 | 8.123    | 9.232 | 10.514 |
| 16.3   | -0.328  | 0.131 | 5.174 | 5.853 | 6.654    | 7.608 | 8.752 | -0.126 | 0.127 | 6.347 | 7.185 | 8.150    | 9.263 | 10.550 |
| 16.4   | -0.340  | 0.131 | 5.178 | 5.856 | 6.658    | 7.614 | 8.764 | -0.127 | 0.127 | 6.367 | 7.208 | 8.176    | 9.292 | 10.584 |
| 16.5   | -0.352  | 0.131 | 5.182 | 5.859 | 6.662    | 7.621 | 8.776 | -0.127 | 0.127 | 6.387 | 7.230 | 8.200    | 9.321 | 10.616 |

**Table S2. Appendicular Lean Soft Tissue Mass Index, kg/m<sup>2</sup>**

| Age, y | Females |       |       |       |          |       |       | Males  |       |       |       |          |       |        |
|--------|---------|-------|-------|-------|----------|-------|-------|--------|-------|-------|-------|----------|-------|--------|
|        | L       | S     | -2 SD | -1 SD | 0 SD (M) | 1 SD  | 2 SD  | L      | S     | -2 SD | -1 SD | 0 SD (M) | 1 SD  | 2 SD   |
| 16.6   | -0.364  | 0.131 | 5.186 | 5.862 | 6.666    | 7.627 | 8.788 | -0.128 | 0.127 | 6.405 | 7.251 | 8.224    | 9.348 | 10.648 |
| 16.7   | -0.376  | 0.132 | 5.189 | 5.865 | 6.669    | 7.633 | 8.799 | -0.128 | 0.127 | 6.423 | 7.271 | 8.248    | 9.374 | 10.678 |
| 16.8   | -0.388  | 0.132 | 5.192 | 5.868 | 6.672    | 7.638 | 8.810 | -0.129 | 0.127 | 6.441 | 7.291 | 8.270    | 9.400 | 10.707 |
| 16.9   | -0.400  | 0.132 | 5.195 | 5.871 | 6.676    | 7.644 | 8.821 | -0.129 | 0.127 | 6.457 | 7.309 | 8.291    | 9.424 | 10.735 |
| 17.0   | -0.412  | 0.132 | 5.198 | 5.873 | 6.678    | 7.649 | 8.832 | -0.130 | 0.127 | 6.473 | 7.328 | 8.311    | 9.447 | 10.761 |
| 17.1   | -0.424  | 0.132 | 5.201 | 5.875 | 6.681    | 7.654 | 8.843 | -0.130 | 0.127 | 6.489 | 7.345 | 8.331    | 9.469 | 10.787 |
| 17.2   | -0.436  | 0.132 | 5.203 | 5.877 | 6.684    | 7.659 | 8.853 | -0.131 | 0.127 | 6.503 | 7.361 | 8.350    | 9.491 | 10.811 |
| 17.3   | -0.448  | 0.132 | 5.206 | 5.879 | 6.686    | 7.664 | 8.863 | -0.131 | 0.127 | 6.517 | 7.377 | 8.368    | 9.511 | 10.835 |
| 17.4   | -0.460  | 0.133 | 5.208 | 5.881 | 6.688    | 7.669 | 8.874 | -0.132 | 0.127 | 6.531 | 7.393 | 8.385    | 9.531 | 10.857 |
| 17.5   | -0.472  | 0.133 | 5.210 | 5.882 | 6.690    | 7.673 | 8.884 | -0.132 | 0.127 | 6.544 | 7.407 | 8.401    | 9.549 | 10.878 |
| 17.6   | -0.484  | 0.133 | 5.212 | 5.884 | 6.692    | 7.677 | 8.894 | -0.133 | 0.127 | 6.557 | 7.421 | 8.417    | 9.567 | 10.899 |
| 17.7   | -0.496  | 0.133 | 5.214 | 5.885 | 6.694    | 7.681 | 8.904 | -0.133 | 0.127 | 6.569 | 7.435 | 8.432    | 9.584 | 10.918 |
| 17.8   | -0.508  | 0.133 | 5.216 | 5.886 | 6.695    | 7.685 | 8.913 | -0.134 | 0.127 | 6.580 | 7.448 | 8.447    | 9.601 | 10.937 |
| 17.9   | -0.520  | 0.133 | 5.217 | 5.887 | 6.697    | 7.689 | 8.923 | -0.134 | 0.127 | 6.591 | 7.460 | 8.461    | 9.617 | 10.955 |
| 18.0   | -0.532  | 0.133 | 5.219 | 5.888 | 6.698    | 7.693 | 8.932 | -0.135 | 0.127 | 6.602 | 7.472 | 8.474    | 9.631 | 10.972 |
| 18.1   | -0.544  | 0.134 | 5.220 | 5.889 | 6.699    | 7.696 | 8.942 | -0.135 | 0.127 | 6.612 | 7.483 | 8.487    | 9.646 | 10.988 |
| 18.2   | -0.556  | 0.134 | 5.221 | 5.889 | 6.700    | 7.699 | 8.951 | -0.136 | 0.127 | 6.622 | 7.494 | 8.499    | 9.659 | 11.003 |
| 18.3   | -0.568  | 0.134 | 5.223 | 5.890 | 6.701    | 7.702 | 8.960 | -0.136 | 0.127 | 6.632 | 7.505 | 8.511    | 9.673 | 11.018 |
| 18.4   | -0.580  | 0.134 | 5.224 | 5.890 | 6.702    | 7.705 | 8.969 | -0.137 | 0.127 | 6.641 | 7.515 | 8.522    | 9.685 | 11.032 |
| 18.5   | -0.592  | 0.134 | 5.225 | 5.891 | 6.702    | 7.708 | 8.977 | -0.138 | 0.127 | 6.650 | 7.524 | 8.533    | 9.697 | 11.046 |
| 18.6   | -0.604  | 0.134 | 5.226 | 5.891 | 6.703    | 7.711 | 8.986 | -0.138 | 0.127 | 6.658 | 7.534 | 8.543    | 9.709 | 11.059 |
| 18.7   | -0.616  | 0.134 | 5.226 | 5.891 | 6.703    | 7.713 | 8.995 | -0.139 | 0.127 | 6.667 | 7.543 | 8.553    | 9.720 | 11.072 |
| 18.8   | -0.628  | 0.135 | 5.227 | 5.891 | 6.703    | 7.716 | 9.003 | -0.139 | 0.127 | 6.675 | 7.552 | 8.563    | 9.731 | 11.084 |
| 18.9   | -0.640  | 0.135 | 5.228 | 5.890 | 6.703    | 7.718 | 9.011 | -0.140 | 0.127 | 6.683 | 7.561 | 8.572    | 9.741 | 11.096 |
| 19.0   | -0.652  | 0.135 | 5.228 | 5.890 | 6.703    | 7.720 | 9.019 | -0.140 | 0.127 | 6.690 | 7.569 | 8.582    | 9.752 | 11.107 |
| 19.1   | -0.664  | 0.135 | 5.228 | 5.890 | 6.703    | 7.722 | 9.027 | -0.141 | 0.127 | 6.698 | 7.577 | 8.591    | 9.762 | 11.118 |
| 19.2   | -0.676  | 0.135 | 5.229 | 5.889 | 6.703    | 7.724 | 9.035 | -0.141 | 0.127 | 6.705 | 7.585 | 8.599    | 9.771 | 11.129 |
| 19.3   | -0.688  | 0.135 | 5.229 | 5.889 | 6.702    | 7.726 | 9.043 | -0.142 | 0.127 | 6.713 | 7.593 | 8.608    | 9.781 | 11.139 |
| 19.4   | -0.700  | 0.136 | 5.229 | 5.888 | 6.702    | 7.727 | 9.051 | -0.142 | 0.127 | 6.720 | 7.601 | 8.617    | 9.790 | 11.150 |
| 19.5   | -0.712  | 0.136 | 5.229 | 5.887 | 6.701    | 7.729 | 9.059 | -0.143 | 0.126 | 6.727 | 7.609 | 8.625    | 9.799 | 11.160 |
| 19.6   | -0.724  | 0.136 | 5.229 | 5.887 | 6.701    | 7.730 | 9.066 | -0.143 | 0.126 | 6.734 | 7.617 | 8.634    | 9.809 | 11.170 |
| 19.7   | -0.736  | 0.136 | 5.229 | 5.886 | 6.700    | 7.732 | 9.074 | -0.144 | 0.126 | 6.742 | 7.624 | 8.642    | 9.818 | 11.180 |
| 19.8   | -0.748  | 0.136 | 5.229 | 5.885 | 6.699    | 7.733 | 9.081 | -0.144 | 0.126 | 6.749 | 7.632 | 8.650    | 9.827 | 11.190 |
| 19.9   | -0.760  | 0.136 | 5.229 | 5.884 | 6.698    | 7.734 | 9.089 | -0.145 | 0.126 | 6.756 | 7.640 | 8.659    | 9.836 | 11.200 |
| 20.0   | -0.772  | 0.136 | 5.229 | 5.883 | 6.697    | 7.735 | 9.096 | -0.145 | 0.126 | 6.763 | 7.648 | 8.667    | 9.845 | 11.211 |







**Table S3. Fat Mass Index, kg/m<sup>2</sup>**

| Age, y | Females |       |       |       |          |       |        | Males  |       |       |       |          |       |        |
|--------|---------|-------|-------|-------|----------|-------|--------|--------|-------|-------|-------|----------|-------|--------|
|        | L       | S     | -2 SD | -1 SD | 0 SD (M) | 1 SD  | 2 SD   | L      | S     | -2 SD | -1 SD | 0 SD (M) | 1 SD  | 2 SD   |
| 17.4   | -0.238  | 0.341 | 3.420 | 4.636 | 6.437    | 9.189 | 13.557 | -0.504 | 0.421 | 1.647 | 2.269 | 3.325    | 5.339 | 9.958  |
| 17.5   | -0.238  | 0.341 | 3.431 | 4.653 | 6.460    | 9.223 | 13.609 | -0.502 | 0.421 | 1.653 | 2.278 | 3.339    | 5.361 | 9.988  |
| 17.6   | -0.238  | 0.342 | 3.443 | 4.668 | 6.483    | 9.257 | 13.661 | -0.499 | 0.422 | 1.659 | 2.287 | 3.353    | 5.384 | 10.018 |
| 17.7   | -0.238  | 0.342 | 3.454 | 4.684 | 6.505    | 9.290 | 13.712 | -0.496 | 0.422 | 1.664 | 2.296 | 3.368    | 5.407 | 10.049 |
| 17.8   | -0.238  | 0.342 | 3.465 | 4.699 | 6.527    | 9.323 | 13.763 | -0.493 | 0.422 | 1.670 | 2.306 | 3.383    | 5.431 | 10.080 |
| 17.9   | -0.238  | 0.342 | 3.475 | 4.714 | 6.549    | 9.355 | 13.814 | -0.490 | 0.422 | 1.676 | 2.315 | 3.399    | 5.455 | 10.112 |
| 18.0   | -0.238  | 0.342 | 3.486 | 4.728 | 6.570    | 9.387 | 13.864 | -0.487 | 0.422 | 1.683 | 2.325 | 3.415    | 5.480 | 10.143 |
| 18.1   | -0.238  | 0.342 | 3.496 | 4.743 | 6.590    | 9.418 | 13.913 | -0.484 | 0.423 | 1.689 | 2.335 | 3.431    | 5.505 | 10.175 |
| 18.2   | -0.238  | 0.342 | 3.505 | 4.756 | 6.610    | 9.448 | 13.962 | -0.481 | 0.423 | 1.695 | 2.346 | 3.447    | 5.531 | 10.207 |
| 18.3   | -0.239  | 0.343 | 3.515 | 4.770 | 6.630    | 9.478 | 14.010 | -0.477 | 0.423 | 1.701 | 2.356 | 3.463    | 5.556 | 10.239 |
| 18.4   | -0.239  | 0.343 | 3.524 | 4.783 | 6.649    | 9.508 | 14.057 | -0.474 | 0.423 | 1.708 | 2.366 | 3.480    | 5.582 | 10.271 |
| 18.5   | -0.239  | 0.343 | 3.534 | 4.796 | 6.668    | 9.537 | 14.104 | -0.470 | 0.424 | 1.714 | 2.376 | 3.497    | 5.608 | 10.302 |
| 18.6   | -0.240  | 0.343 | 3.542 | 4.809 | 6.687    | 9.565 | 14.150 | -0.467 | 0.424 | 1.720 | 2.387 | 3.513    | 5.634 | 10.333 |
| 18.7   | -0.240  | 0.343 | 3.551 | 4.821 | 6.705    | 9.593 | 14.196 | -0.463 | 0.424 | 1.726 | 2.397 | 3.530    | 5.660 | 10.363 |
| 18.8   | -0.240  | 0.343 | 3.559 | 4.832 | 6.722    | 9.620 | 14.240 | -0.459 | 0.424 | 1.733 | 2.407 | 3.547    | 5.685 | 10.393 |
| 18.9   | -0.241  | 0.344 | 3.567 | 4.844 | 6.739    | 9.646 | 14.284 | -0.456 | 0.424 | 1.739 | 2.417 | 3.563    | 5.711 | 10.423 |
| 19.0   | -0.241  | 0.344 | 3.575 | 4.855 | 6.755    | 9.672 | 14.328 | -0.452 | 0.425 | 1.744 | 2.427 | 3.580    | 5.736 | 10.452 |
| 19.1   | -0.241  | 0.344 | 3.583 | 4.866 | 6.771    | 9.697 | 14.370 | -0.448 | 0.425 | 1.750 | 2.437 | 3.596    | 5.762 | 10.480 |
| 19.2   | -0.242  | 0.344 | 3.590 | 4.876 | 6.787    | 9.722 | 14.411 | -0.444 | 0.425 | 1.756 | 2.447 | 3.613    | 5.787 | 10.508 |
| 19.3   | -0.242  | 0.344 | 3.597 | 4.886 | 6.802    | 9.746 | 14.452 | -0.440 | 0.425 | 1.762 | 2.457 | 3.629    | 5.812 | 10.535 |
| 19.4   | -0.243  | 0.345 | 3.604 | 4.896 | 6.816    | 9.769 | 14.492 | -0.436 | 0.426 | 1.767 | 2.467 | 3.645    | 5.837 | 10.561 |
| 19.5   | -0.243  | 0.345 | 3.611 | 4.905 | 6.830    | 9.792 | 14.531 | -0.432 | 0.426 | 1.773 | 2.477 | 3.661    | 5.862 | 10.588 |
| 19.6   | -0.244  | 0.345 | 3.617 | 4.914 | 6.844    | 9.814 | 14.570 | -0.428 | 0.426 | 1.778 | 2.486 | 3.678    | 5.886 | 10.614 |
| 19.7   | -0.244  | 0.345 | 3.623 | 4.923 | 6.857    | 9.835 | 14.608 | -0.424 | 0.426 | 1.784 | 2.496 | 3.694    | 5.911 | 10.639 |
| 19.8   | -0.245  | 0.345 | 3.629 | 4.931 | 6.870    | 9.856 | 14.645 | -0.419 | 0.427 | 1.789 | 2.506 | 3.710    | 5.936 | 10.665 |
| 19.9   | -0.246  | 0.346 | 3.635 | 4.939 | 6.883    | 9.877 | 14.681 | -0.415 | 0.427 | 1.794 | 2.515 | 3.726    | 5.960 | 10.690 |
| 20.0   | -0.246  | 0.346 | 3.640 | 4.947 | 6.895    | 9.897 | 14.716 | -0.411 | 0.427 | 1.800 | 2.525 | 3.742    | 5.985 | 10.715 |





**Table S4. Total Lean Soft Tissue Mass Index, kg/m<sup>2</sup>**

| Age, y | Females |       |        |        |          |        |        | Males  |       |        |        |          |        |        |
|--------|---------|-------|--------|--------|----------|--------|--------|--------|-------|--------|--------|----------|--------|--------|
|        | L       | S     | -2 SD  | -1 SD  | 0 SD (M) | 1 SD   | 2 SD   | L      | S     | -2 SD  | -1 SD  | 0 SD (M) | 1 SD   | 2 SD   |
| 17.3   | -0.466  | 0.104 | 12.655 | 13.946 | 15.438   | 17.177 | 19.218 | -0.303 | 0.109 | 14.594 | 16.191 | 18.024   | 20.136 | 22.582 |
| 17.4   | -0.477  | 0.104 | 12.665 | 13.955 | 15.448   | 17.191 | 19.240 | -0.303 | 0.109 | 14.628 | 16.230 | 18.068   | 20.187 | 22.641 |
| 17.5   | -0.489  | 0.104 | 12.674 | 13.963 | 15.458   | 17.204 | 19.261 | -0.303 | 0.109 | 14.662 | 16.268 | 18.111   | 20.236 | 22.698 |
| 17.6   | -0.501  | 0.104 | 12.683 | 13.972 | 15.468   | 17.217 | 19.282 | -0.303 | 0.109 | 14.694 | 16.305 | 18.153   | 20.284 | 22.753 |
| 17.7   | -0.513  | 0.104 | 12.691 | 13.980 | 15.477   | 17.230 | 19.302 | -0.303 | 0.109 | 14.726 | 16.340 | 18.193   | 20.330 | 22.806 |
| 17.8   | -0.524  | 0.105 | 12.699 | 13.987 | 15.485   | 17.242 | 19.322 | -0.303 | 0.109 | 14.756 | 16.375 | 18.233   | 20.375 | 22.858 |
| 17.9   | -0.536  | 0.105 | 12.707 | 13.994 | 15.493   | 17.254 | 19.342 | -0.303 | 0.109 | 14.786 | 16.408 | 18.271   | 20.418 | 22.907 |
| 18.0   | -0.548  | 0.105 | 12.715 | 14.001 | 15.501   | 17.265 | 19.361 | -0.303 | 0.109 | 14.814 | 16.441 | 18.307   | 20.460 | 22.955 |
| 18.1   | -0.560  | 0.105 | 12.722 | 14.008 | 15.509   | 17.276 | 19.379 | -0.304 | 0.109 | 14.842 | 16.472 | 18.343   | 20.501 | 23.002 |
| 18.2   | -0.572  | 0.105 | 12.729 | 14.014 | 15.516   | 17.287 | 19.397 | -0.304 | 0.109 | 14.869 | 16.502 | 18.377   | 20.540 | 23.047 |
| 18.3   | -0.583  | 0.105 | 12.735 | 14.020 | 15.522   | 17.297 | 19.415 | -0.304 | 0.109 | 14.895 | 16.532 | 18.411   | 20.578 | 23.090 |
| 18.4   | -0.595  | 0.105 | 12.741 | 14.025 | 15.529   | 17.306 | 19.432 | -0.304 | 0.109 | 14.921 | 16.560 | 18.443   | 20.615 | 23.132 |
| 18.5   | -0.607  | 0.105 | 12.747 | 14.030 | 15.534   | 17.316 | 19.449 | -0.304 | 0.109 | 14.945 | 16.588 | 18.474   | 20.650 | 23.173 |
| 18.6   | -0.619  | 0.105 | 12.753 | 14.035 | 15.540   | 17.324 | 19.466 | -0.304 | 0.110 | 14.969 | 16.615 | 18.505   | 20.685 | 23.212 |
| 18.7   | -0.630  | 0.105 | 12.758 | 14.040 | 15.545   | 17.333 | 19.482 | -0.304 | 0.110 | 14.993 | 16.641 | 18.534   | 20.718 | 23.250 |
| 18.8   | -0.642  | 0.105 | 12.763 | 14.044 | 15.550   | 17.341 | 19.498 | -0.305 | 0.110 | 15.015 | 16.667 | 18.563   | 20.751 | 23.287 |
| 18.9   | -0.654  | 0.105 | 12.768 | 14.048 | 15.554   | 17.349 | 19.513 | -0.305 | 0.110 | 15.037 | 16.691 | 18.591   | 20.782 | 23.323 |
| 19.0   | -0.666  | 0.105 | 12.772 | 14.051 | 15.559   | 17.356 | 19.528 | -0.305 | 0.110 | 15.059 | 16.715 | 18.618   | 20.813 | 23.358 |
| 19.1   | -0.678  | 0.106 | 12.776 | 14.054 | 15.562   | 17.363 | 19.543 | -0.305 | 0.110 | 15.080 | 16.739 | 18.644   | 20.843 | 23.392 |
| 19.2   | -0.689  | 0.106 | 12.780 | 14.057 | 15.566   | 17.370 | 19.557 | -0.305 | 0.110 | 15.101 | 16.762 | 18.670   | 20.872 | 23.425 |
| 19.3   | -0.701  | 0.106 | 12.784 | 14.060 | 15.569   | 17.376 | 19.571 | -0.305 | 0.110 | 15.121 | 16.784 | 18.695   | 20.900 | 23.457 |
| 19.4   | -0.713  | 0.106 | 12.788 | 14.063 | 15.572   | 17.382 | 19.585 | -0.305 | 0.110 | 15.140 | 16.806 | 18.720   | 20.928 | 23.489 |
| 19.5   | -0.725  | 0.106 | 12.791 | 14.065 | 15.575   | 17.388 | 19.598 | -0.305 | 0.110 | 15.160 | 16.828 | 18.744   | 20.955 | 23.519 |
| 19.6   | -0.736  | 0.106 | 12.794 | 14.067 | 15.577   | 17.393 | 19.611 | -0.306 | 0.110 | 15.179 | 16.849 | 18.768   | 20.982 | 23.550 |
| 19.7   | -0.748  | 0.106 | 12.797 | 14.069 | 15.579   | 17.398 | 19.624 | -0.306 | 0.110 | 15.198 | 16.870 | 18.791   | 21.008 | 23.579 |
| 19.8   | -0.760  | 0.106 | 12.800 | 14.070 | 15.581   | 17.403 | 19.637 | -0.306 | 0.110 | 15.216 | 16.891 | 18.814   | 21.034 | 23.609 |
| 19.9   | -0.772  | 0.106 | 12.802 | 14.072 | 15.583   | 17.408 | 19.649 | -0.306 | 0.110 | 15.235 | 16.911 | 18.837   | 21.060 | 23.638 |
| 20.0   | -0.784  | 0.106 | 12.805 | 14.073 | 15.585   | 17.413 | 19.661 | -0.306 | 0.110 | 15.253 | 16.932 | 18.860   | 21.085 | 23.667 |







**Table S5. Subtotal Lean Soft Tissue Mass Index, kg/m<sup>2</sup>**

| Age, y | Females |       |        |        |          |        |        | Males  |       |        |        |          |        |        |
|--------|---------|-------|--------|--------|----------|--------|--------|--------|-------|--------|--------|----------|--------|--------|
|        | L       | S     | -2 SD  | -1 SD  | 0 SD (M) | 1 SD   | 2 SD   | L      | S     | -2 SD  | -1 SD  | 0 SD (M) | 1 SD   | 2 SD   |
| 17.4   | -0.308  | 0.110 | 11.567 | 12.841 | 14.304   | 15.993 | 17.953 | -0.221 | 0.114 | 13.561 | 15.134 | 16.935   | 19.005 | 21.393 |
| 17.5   | -0.319  | 0.110 | 11.576 | 12.849 | 14.314   | 16.006 | 17.973 | -0.222 | 0.114 | 13.595 | 15.171 | 16.977   | 19.053 | 21.447 |
| 17.6   | -0.329  | 0.110 | 11.585 | 12.858 | 14.323   | 16.019 | 17.992 | -0.223 | 0.114 | 13.627 | 15.208 | 17.018   | 19.099 | 21.500 |
| 17.7   | -0.340  | 0.110 | 11.594 | 12.866 | 14.332   | 16.031 | 18.011 | -0.223 | 0.114 | 13.659 | 15.243 | 17.058   | 19.144 | 21.551 |
| 17.8   | -0.351  | 0.110 | 11.602 | 12.873 | 14.340   | 16.043 | 18.030 | -0.224 | 0.114 | 13.689 | 15.277 | 17.096   | 19.187 | 21.600 |
| 17.9   | -0.361  | 0.110 | 11.609 | 12.880 | 14.348   | 16.054 | 18.048 | -0.225 | 0.114 | 13.719 | 15.310 | 17.133   | 19.229 | 21.647 |
| 18.0   | -0.372  | 0.110 | 11.617 | 12.887 | 14.356   | 16.065 | 18.065 | -0.225 | 0.114 | 13.747 | 15.341 | 17.168   | 19.269 | 21.693 |
| 18.1   | -0.383  | 0.110 | 11.624 | 12.894 | 14.363   | 16.075 | 18.083 | -0.226 | 0.114 | 13.775 | 15.372 | 17.203   | 19.307 | 21.737 |
| 18.2   | -0.393  | 0.110 | 11.631 | 12.900 | 14.370   | 16.085 | 18.099 | -0.227 | 0.114 | 13.802 | 15.402 | 17.236   | 19.345 | 21.779 |
| 18.3   | -0.404  | 0.110 | 11.637 | 12.906 | 14.377   | 16.095 | 18.116 | -0.227 | 0.114 | 13.828 | 15.431 | 17.268   | 19.381 | 21.820 |
| 18.4   | -0.415  | 0.110 | 11.643 | 12.911 | 14.383   | 16.104 | 18.132 | -0.228 | 0.114 | 13.853 | 15.458 | 17.299   | 19.416 | 21.860 |
| 18.5   | -0.425  | 0.110 | 11.649 | 12.916 | 14.389   | 16.113 | 18.148 | -0.229 | 0.114 | 13.877 | 15.485 | 17.329   | 19.449 | 21.898 |
| 18.6   | -0.436  | 0.111 | 11.655 | 12.921 | 14.394   | 16.122 | 18.163 | -0.229 | 0.114 | 13.901 | 15.511 | 17.358   | 19.482 | 21.935 |
| 18.7   | -0.446  | 0.111 | 11.660 | 12.926 | 14.400   | 16.130 | 18.178 | -0.230 | 0.114 | 13.924 | 15.537 | 17.386   | 19.513 | 21.970 |
| 18.8   | -0.457  | 0.111 | 11.665 | 12.930 | 14.404   | 16.138 | 18.192 | -0.231 | 0.114 | 13.946 | 15.561 | 17.413   | 19.544 | 22.005 |
| 18.9   | -0.468  | 0.111 | 11.670 | 12.934 | 14.409   | 16.145 | 18.206 | -0.231 | 0.114 | 13.968 | 15.585 | 17.440   | 19.573 | 22.038 |
| 19.0   | -0.478  | 0.111 | 11.674 | 12.937 | 14.413   | 16.152 | 18.220 | -0.232 | 0.114 | 13.989 | 15.608 | 17.465   | 19.602 | 22.070 |
| 19.1   | -0.489  | 0.111 | 11.679 | 12.941 | 14.417   | 16.159 | 18.234 | -0.233 | 0.114 | 14.010 | 15.631 | 17.490   | 19.630 | 22.102 |
| 19.2   | -0.500  | 0.111 | 11.683 | 12.944 | 14.421   | 16.165 | 18.247 | -0.234 | 0.114 | 14.030 | 15.653 | 17.515   | 19.657 | 22.132 |
| 19.3   | -0.510  | 0.111 | 11.686 | 12.947 | 14.424   | 16.172 | 18.260 | -0.234 | 0.114 | 14.050 | 15.675 | 17.539   | 19.684 | 22.162 |
| 19.4   | -0.521  | 0.111 | 11.690 | 12.949 | 14.427   | 16.177 | 18.272 | -0.235 | 0.114 | 14.069 | 15.696 | 17.562   | 19.709 | 22.191 |
| 19.5   | -0.532  | 0.111 | 11.693 | 12.952 | 14.430   | 16.183 | 18.285 | -0.236 | 0.114 | 14.088 | 15.717 | 17.585   | 19.735 | 22.219 |
| 19.6   | -0.542  | 0.111 | 11.697 | 12.954 | 14.432   | 16.188 | 18.297 | -0.236 | 0.114 | 14.107 | 15.737 | 17.607   | 19.760 | 22.247 |
| 19.7   | -0.553  | 0.111 | 11.700 | 12.956 | 14.435   | 16.193 | 18.309 | -0.237 | 0.114 | 14.125 | 15.757 | 17.629   | 19.784 | 22.274 |
| 19.8   | -0.564  | 0.111 | 11.703 | 12.958 | 14.437   | 16.198 | 18.320 | -0.238 | 0.114 | 14.143 | 15.777 | 17.651   | 19.808 | 22.301 |
| 19.9   | -0.574  | 0.112 | 11.705 | 12.959 | 14.439   | 16.203 | 18.332 | -0.238 | 0.114 | 14.161 | 15.797 | 17.672   | 19.832 | 22.328 |
| 20.0   | -0.585  | 0.112 | 11.708 | 12.961 | 14.441   | 16.207 | 18.343 | -0.239 | 0.114 | 14.179 | 15.816 | 17.694   | 19.855 | 22.354 |

**Table S6. Total Lean Soft Tissue Mass, kg**

| Age, y | Females |       |        |        |          |        |        | Males  |       |        |        |          |        |        |
|--------|---------|-------|--------|--------|----------|--------|--------|--------|-------|--------|--------|----------|--------|--------|
|        | L       | S     | -2 SD  | -1 SD  | 0 SD (M) | 1 SD   | 2 SD   | L      | S     | -2 SD  | -1 SD  | 0 SD (M) | 1 SD   | 2 SD   |
| 5.0    | 0.077   | 0.124 | 10.237 | 11.610 | 13.152   | 14.880 | 16.816 | -0.168 | 0.113 | 11.386 | 12.713 | 14.223   | 15.947 | 17.920 |
| 5.1    | 0.077   | 0.124 | 10.383 | 11.780 | 13.347   | 15.106 | 17.076 | -0.165 | 0.114 | 11.541 | 12.891 | 14.429   | 16.185 | 18.195 |
| 5.2    | 0.077   | 0.125 | 10.529 | 11.949 | 13.543   | 15.331 | 17.335 | -0.162 | 0.114 | 11.695 | 13.070 | 14.636   | 16.424 | 18.471 |
| 5.3    | 0.077   | 0.125 | 10.675 | 12.118 | 13.738   | 15.557 | 17.595 | -0.159 | 0.115 | 11.849 | 13.248 | 14.842   | 16.663 | 18.748 |
| 5.4    | 0.077   | 0.125 | 10.821 | 12.287 | 13.934   | 15.782 | 17.855 | -0.157 | 0.115 | 12.003 | 13.427 | 15.049   | 16.903 | 19.026 |
| 5.5    | 0.078   | 0.125 | 10.966 | 12.455 | 14.129   | 16.008 | 18.116 | -0.154 | 0.116 | 12.157 | 13.605 | 15.257   | 17.143 | 19.304 |
| 5.6    | 0.078   | 0.126 | 11.111 | 12.624 | 14.325   | 16.234 | 18.376 | -0.151 | 0.116 | 12.311 | 13.784 | 15.464   | 17.384 | 19.584 |
| 5.7    | 0.078   | 0.126 | 11.257 | 12.793 | 14.520   | 16.460 | 18.638 | -0.148 | 0.116 | 12.464 | 13.963 | 15.672   | 17.626 | 19.864 |
| 5.8    | 0.078   | 0.126 | 11.401 | 12.961 | 14.716   | 16.687 | 18.899 | -0.145 | 0.117 | 12.618 | 14.142 | 15.880   | 17.868 | 20.146 |
| 5.9    | 0.078   | 0.127 | 11.546 | 13.130 | 14.911   | 16.913 | 19.161 | -0.142 | 0.117 | 12.772 | 14.321 | 16.089   | 18.111 | 20.428 |
| 6.0    | 0.078   | 0.127 | 11.691 | 13.298 | 15.107   | 17.140 | 19.423 | -0.140 | 0.118 | 12.925 | 14.501 | 16.298   | 18.354 | 20.712 |
| 6.1    | 0.079   | 0.127 | 11.835 | 13.467 | 15.303   | 17.367 | 19.686 | -0.137 | 0.118 | 13.079 | 14.680 | 16.508   | 18.599 | 20.996 |
| 6.2    | 0.079   | 0.127 | 11.980 | 13.635 | 15.499   | 17.595 | 19.949 | -0.134 | 0.119 | 13.233 | 14.860 | 16.718   | 18.844 | 21.282 |
| 6.3    | 0.079   | 0.128 | 12.125 | 13.804 | 15.696   | 17.823 | 20.213 | -0.131 | 0.119 | 13.387 | 15.040 | 16.929   | 19.090 | 21.569 |
| 6.4    | 0.079   | 0.128 | 12.270 | 13.974 | 15.893   | 18.052 | 20.478 | -0.128 | 0.120 | 13.540 | 15.221 | 17.140   | 19.337 | 21.858 |
| 6.5    | 0.079   | 0.128 | 12.415 | 14.143 | 16.090   | 18.281 | 20.744 | -0.126 | 0.120 | 13.695 | 15.402 | 17.352   | 19.586 | 22.147 |
| 6.6    | 0.079   | 0.129 | 12.561 | 14.313 | 16.288   | 18.512 | 21.011 | -0.123 | 0.121 | 13.849 | 15.583 | 17.565   | 19.834 | 22.438 |
| 6.7    | 0.080   | 0.129 | 12.706 | 14.484 | 16.487   | 18.743 | 21.280 | -0.120 | 0.121 | 14.003 | 15.765 | 17.778   | 20.084 | 22.731 |
| 6.8    | 0.080   | 0.129 | 12.853 | 14.655 | 16.687   | 18.975 | 21.549 | -0.117 | 0.122 | 14.158 | 15.947 | 17.992   | 20.335 | 23.025 |
| 6.9    | 0.080   | 0.129 | 13.000 | 14.827 | 16.887   | 19.209 | 21.820 | -0.114 | 0.122 | 14.312 | 16.129 | 18.207   | 20.587 | 23.320 |
| 7.0    | 0.080   | 0.130 | 13.147 | 15.000 | 17.089   | 19.444 | 22.093 | -0.111 | 0.122 | 14.467 | 16.312 | 18.423   | 20.841 | 23.617 |
| 7.1    | 0.080   | 0.130 | 13.296 | 15.174 | 17.293   | 19.680 | 22.368 | -0.109 | 0.123 | 14.622 | 16.496 | 18.639   | 21.095 | 23.915 |
| 7.2    | 0.080   | 0.130 | 13.446 | 15.349 | 17.497   | 19.919 | 22.646 | -0.106 | 0.123 | 14.778 | 16.679 | 18.855   | 21.350 | 24.214 |
| 7.3    | 0.081   | 0.131 | 13.597 | 15.526 | 17.704   | 20.160 | 22.926 | -0.103 | 0.124 | 14.933 | 16.864 | 19.073   | 21.606 | 24.515 |
| 7.4    | 0.081   | 0.131 | 13.749 | 15.705 | 17.913   | 20.404 | 23.209 | -0.100 | 0.124 | 15.089 | 17.048 | 19.291   | 21.863 | 24.817 |
| 7.5    | 0.081   | 0.131 | 13.903 | 15.885 | 18.124   | 20.650 | 23.495 | -0.097 | 0.125 | 15.245 | 17.233 | 19.510   | 22.121 | 25.121 |
| 7.6    | 0.081   | 0.131 | 14.059 | 16.068 | 18.337   | 20.898 | 23.784 | -0.095 | 0.125 | 15.401 | 17.418 | 19.729   | 22.380 | 25.425 |
| 7.7    | 0.081   | 0.132 | 14.217 | 16.253 | 18.554   | 21.150 | 24.077 | -0.092 | 0.126 | 15.557 | 17.604 | 19.949   | 22.640 | 25.732 |
| 7.8    | 0.081   | 0.132 | 14.377 | 16.440 | 18.773   | 21.406 | 24.374 | -0.089 | 0.126 | 15.713 | 17.790 | 20.170   | 22.901 | 26.039 |
| 7.9    | 0.082   | 0.132 | 14.539 | 16.630 | 18.995   | 21.665 | 24.675 | -0.086 | 0.127 | 15.870 | 17.977 | 20.392   | 23.163 | 26.348 |
| 8.0    | 0.082   | 0.132 | 14.703 | 16.823 | 19.220   | 21.928 | 24.981 | -0.083 | 0.127 | 16.027 | 18.165 | 20.615   | 23.427 | 26.659 |
| 8.1    | 0.082   | 0.133 | 14.871 | 17.020 | 19.450   | 22.195 | 25.292 | -0.080 | 0.128 | 16.184 | 18.353 | 20.838   | 23.692 | 26.972 |
| 8.2    | 0.082   | 0.133 | 15.041 | 17.219 | 19.683   | 22.467 | 25.608 | -0.078 | 0.128 | 16.343 | 18.542 | 21.063   | 23.958 | 27.287 |
| 8.3    | 0.082   | 0.133 | 15.215 | 17.422 | 19.921   | 22.744 | 25.930 | -0.075 | 0.129 | 16.502 | 18.732 | 21.290   | 24.226 | 27.603 |
| 8.4    | 0.083   | 0.134 | 15.392 | 17.630 | 20.163   | 23.026 | 26.257 | -0.072 | 0.129 | 16.661 | 18.923 | 21.517   | 24.496 | 27.922 |
| 8.5    | 0.083   | 0.134 | 15.572 | 17.841 | 20.409   | 23.313 | 26.591 | -0.069 | 0.130 | 16.822 | 19.115 | 21.746   | 24.768 | 28.243 |
| 8.6    | 0.083   | 0.134 | 15.756 | 18.056 | 20.661   | 23.606 | 26.931 | -0.066 | 0.130 | 16.983 | 19.309 | 21.977   | 25.042 | 28.567 |
| 8.7    | 0.083   | 0.134 | 15.944 | 18.276 | 20.917   | 23.904 | 27.278 | -0.064 | 0.130 | 17.146 | 19.504 | 22.210   | 25.318 | 28.894 |
| 8.8    | 0.083   | 0.134 | 16.136 | 18.501 | 21.179   | 24.209 | 27.631 | -0.061 | 0.131 | 17.310 | 19.700 | 22.444   | 25.597 | 29.223 |
| 8.9    | 0.083   | 0.135 | 16.332 | 18.730 | 21.446   | 24.520 | 27.992 | -0.058 | 0.131 | 17.475 | 19.899 | 22.681   | 25.878 | 29.556 |
| 9.0    | 0.084   | 0.135 | 16.533 | 18.964 | 21.719   | 24.836 | 28.359 | -0.055 | 0.132 | 17.642 | 20.100 | 22.921   | 26.163 | 29.893 |
| 9.1    | 0.084   | 0.135 | 16.737 | 19.203 | 21.997   | 25.160 | 28.734 | -0.052 | 0.132 | 17.811 | 20.303 | 23.163   | 26.451 | 30.233 |
| 9.2    | 0.084   | 0.135 | 16.946 | 19.447 | 22.281   | 25.490 | 29.116 | -0.049 | 0.133 | 17.983 | 20.508 | 23.409   | 26.743 | 30.578 |
| 9.3    | 0.084   | 0.135 | 17.160 | 19.696 | 22.571   | 25.827 | 29.506 | -0.047 | 0.133 | 18.156 | 20.717 | 23.658   | 27.038 | 30.928 |
| 9.4    | 0.084   | 0.136 | 17.379 | 19.951 | 22.868   | 26.170 | 29.904 | -0.044 | 0.134 | 18.333 | 20.929 | 23.910   | 27.338 | 31.283 |
| 9.5    | 0.084   | 0.136 | 17.602 | 20.211 | 23.170   | 26.520 | 30.309 | -0.041 | 0.134 | 18.512 | 21.144 | 24.167   | 27.643 | 31.643 |
| 9.6    | 0.085   | 0.136 | 17.830 | 20.476 | 23.478   | 26.877 | 30.722 | -0.038 | 0.134 | 18.694 | 21.362 | 24.428   | 27.953 | 32.009 |
| 9.7    | 0.085   | 0.136 | 18.062 | 20.746 | 23.791   | 27.241 | 31.142 | -0.035 | 0.135 | 18.879 | 21.585 | 24.693   | 28.268 | 32.381 |
| 9.8    | 0.085   | 0.136 | 18.299 | 21.022 | 24.111   | 27.610 | 31.569 | -0.033 | 0.135 | 19.068 | 21.811 | 24.964   | 28.588 | 32.759 |
| 9.9    | 0.085   | 0.136 | 18.540 | 21.302 | 24.436   | 27.986 | 32.003 | -0.030 | 0.136 | 19.261 | 22.043 | 25.239   | 28.915 | 33.145 |
| 10.0   | 0.085   | 0.137 | 18.785 | 21.587 | 24.766   | 28.368 | 32.443 | -0.027 | 0.136 | 19.459 | 22.279 | 25.521   | 29.249 | 33.538 |
| 10.1   | 0.085   | 0.137 | 19.035 | 21.877 | 25.102   | 28.756 | 32.891 | -0.024 | 0.136 | 19.660 | 22.520 | 25.808   | 29.589 | 33.939 |
| 10.2   | 0.086   | 0.137 | 19.290 | 22.172 | 25.443   | 29.150 | 33.344 | -0.021 | 0.137 | 19.867 | 22.767 | 26.102   | 29.937 | 34.349 |
| 10.3   | 0.086   | 0.137 | 19.548 | 22.471 | 25.789   | 29.549 | 33.804 | -0.018 | 0.137 | 20.078 | 23.020 | 26.403   | 30.292 | 34.768 |
| 10.4   | 0.086   | 0.137 | 19.810 | 22.775 | 26.139   | 29.953 | 34.269 | -0.016 | 0.138 | 20.295 | 23.279 | 26.710   | 30.656 | 35.195 |
| 10.5   | 0.086   | 0.137 | 20.076 | 23.082 | 26.494   | 30.362 | 34.739 | -0.013 | 0.138 | 20.517 | 23.545 | 27.026   | 31.029 | 35.633 |
| 10.6   | 0.086   | 0.137 | 20.345 | 23.393 | 26.852   | 30.774 | 35.213 | -0.010 | 0.138 | 20.746 | 23.817 | 27.349   | 31.410 | 36.081 |
| 10.7   | 0.086   | 0.137 | 20.616 | 23.706 | 27.214   | 31.190 | 35.690 | -0.007 | 0.139 | 20.980 | 24.097 | 27.680   | 31.800 | 36.539 |
| 10.8   | 0.087   | 0.137 | 20.891 | 24.023 | 27.579   | 31.609 | 36.171 | -0.004 | 0.139 | 21.221 | 24.383 | 28.019   | 32.200 | 37.008 |
| 10.9   | 0.087   | 0.137 | 21.168 | 24.342 | 27.946   | 32.031 | 36.654 | -0.002 | 0.139 | 21.468 | 24.677 | 28.367   | 32.610 | 37.488 |
| 11.0   | 0.087   | 0.137 | 21.447 | 24.663 | 28.315   | 32.454 | 37.139 | 0.001  | 0.140 | 21.722 | 24.979 | 28.724   | 33.029 | 37.979 |
| 11.1   | 0.087   | 0.137 | 21.727 | 24.986 | 28.686   | 32.879 | 37.625 | 0.004  | 0.140 | 21.983 | 25.289 | 29.090   | 33.459 | 38.482 |

**Table S6. Total Lean Soft Tissue Mass, kg**

| Age, y | Females |       |        |        |          |        |        | Males |       |        |        |          |        |        |
|--------|---------|-------|--------|--------|----------|--------|--------|-------|-------|--------|--------|----------|--------|--------|
|        | L       | S     | -2 SD  | -1 SD  | 0 SD (M) | 1 SD   | 2 SD   | L     | S     | -2 SD  | -1 SD  | 0 SD (M) | 1 SD   | 2 SD   |
| 11.2   | 0.087   | 0.137 | 22.009 | 25.310 | 29.058   | 33.305 | 38.111 | 0.007 | 0.140 | 22.251 | 25.606 | 29.465   | 33.899 | 38.996 |
| 11.3   | 0.088   | 0.137 | 22.292 | 25.635 | 29.430   | 33.731 | 38.598 | 0.010 | 0.141 | 22.526 | 25.933 | 29.849   | 34.350 | 39.523 |
| 11.4   | 0.088   | 0.137 | 22.576 | 25.960 | 29.802   | 34.156 | 39.083 | 0.013 | 0.141 | 22.808 | 26.267 | 30.243   | 34.812 | 40.062 |
| 11.5   | 0.088   | 0.137 | 22.859 | 26.285 | 30.174   | 34.580 | 39.567 | 0.015 | 0.141 | 23.099 | 26.611 | 30.647   | 35.285 | 40.613 |
| 11.6   | 0.088   | 0.137 | 23.142 | 26.610 | 30.544   | 35.003 | 40.047 | 0.018 | 0.141 | 23.397 | 26.963 | 31.061   | 35.769 | 41.176 |
| 11.7   | 0.088   | 0.137 | 23.425 | 26.933 | 30.913   | 35.423 | 40.525 | 0.021 | 0.142 | 23.702 | 27.323 | 31.484   | 36.263 | 41.751 |
| 11.8   | 0.088   | 0.137 | 23.706 | 27.254 | 31.279   | 35.840 | 40.998 | 0.024 | 0.142 | 24.014 | 27.691 | 31.916   | 36.768 | 42.337 |
| 11.9   | 0.089   | 0.137 | 23.986 | 27.573 | 31.643   | 36.253 | 41.467 | 0.027 | 0.142 | 24.334 | 28.068 | 32.358   | 37.283 | 42.934 |
| 12.0   | 0.089   | 0.137 | 24.264 | 27.890 | 32.003   | 36.661 | 41.930 | 0.029 | 0.142 | 24.660 | 28.452 | 32.808   | 37.807 | 43.542 |
| 12.1   | 0.089   | 0.137 | 24.540 | 28.203 | 32.359   | 37.065 | 42.387 | 0.032 | 0.142 | 24.994 | 28.844 | 33.266   | 38.341 | 44.161 |
| 12.2   | 0.089   | 0.136 | 24.813 | 28.513 | 32.710   | 37.463 | 42.837 | 0.035 | 0.142 | 25.334 | 29.244 | 33.733   | 38.884 | 44.789 |
| 12.3   | 0.089   | 0.136 | 25.082 | 28.820 | 33.057   | 37.855 | 43.280 | 0.038 | 0.143 | 25.681 | 29.651 | 34.208   | 39.435 | 45.427 |
| 12.4   | 0.089   | 0.136 | 25.349 | 29.122 | 33.399   | 38.241 | 43.715 | 0.041 | 0.143 | 26.034 | 30.065 | 34.691   | 39.996 | 46.073 |
| 12.5   | 0.090   | 0.136 | 25.612 | 29.419 | 33.735   | 38.620 | 44.141 | 0.044 | 0.143 | 26.394 | 30.486 | 35.182   | 40.564 | 46.729 |
| 12.6   | 0.090   | 0.136 | 25.871 | 29.712 | 34.065   | 38.992 | 44.559 | 0.046 | 0.143 | 26.759 | 30.914 | 35.679   | 41.139 | 47.391 |
| 12.7   | 0.090   | 0.136 | 26.125 | 29.999 | 34.389   | 39.355 | 44.967 | 0.049 | 0.143 | 27.130 | 31.346 | 36.182   | 41.721 | 48.061 |
| 12.8   | 0.090   | 0.136 | 26.374 | 30.280 | 34.705   | 39.711 | 45.365 | 0.052 | 0.143 | 27.505 | 31.785 | 36.691   | 42.309 | 48.736 |
| 12.9   | 0.090   | 0.135 | 26.619 | 30.555 | 35.014   | 40.057 | 45.753 | 0.055 | 0.143 | 27.885 | 32.228 | 37.204   | 42.902 | 49.416 |
| 13.0   | 0.090   | 0.135 | 26.858 | 30.824 | 35.316   | 40.395 | 46.130 | 0.058 | 0.143 | 28.269 | 32.675 | 37.723   | 43.499 | 50.101 |
| 13.1   | 0.091   | 0.135 | 27.092 | 31.087 | 35.609   | 40.723 | 46.496 | 0.061 | 0.143 | 28.657 | 33.126 | 38.244   | 44.099 | 50.788 |
| 13.2   | 0.091   | 0.135 | 27.321 | 31.343 | 35.896   | 41.042 | 46.851 | 0.063 | 0.143 | 29.047 | 33.580 | 38.769   | 44.702 | 51.478 |
| 13.3   | 0.091   | 0.135 | 27.544 | 31.592 | 36.174   | 41.352 | 47.196 | 0.066 | 0.143 | 29.441 | 34.037 | 39.297   | 45.308 | 52.169 |
| 13.4   | 0.091   | 0.134 | 27.761 | 31.834 | 36.444   | 41.653 | 47.529 | 0.069 | 0.143 | 29.837 | 34.497 | 39.826   | 45.915 | 52.861 |
| 13.5   | 0.091   | 0.134 | 27.972 | 32.070 | 36.706   | 41.943 | 47.851 | 0.072 | 0.143 | 30.235 | 34.957 | 40.357   | 46.522 | 53.552 |
| 13.6   | 0.091   | 0.134 | 28.177 | 32.298 | 36.960   | 42.224 | 48.162 | 0.075 | 0.143 | 30.634 | 35.419 | 40.888   | 47.129 | 54.242 |
| 13.7   | 0.092   | 0.134 | 28.376 | 32.520 | 37.205   | 42.495 | 48.461 | 0.077 | 0.143 | 31.034 | 35.881 | 41.418   | 47.735 | 54.929 |
| 13.8   | 0.092   | 0.134 | 28.569 | 32.733 | 37.442   | 42.757 | 48.748 | 0.080 | 0.143 | 31.434 | 36.343 | 41.948   | 48.338 | 55.613 |
| 13.9   | 0.092   | 0.133 | 28.756 | 32.940 | 37.670   | 43.008 | 49.025 | 0.083 | 0.142 | 31.834 | 36.804 | 42.475   | 48.939 | 56.292 |
| 14.0   | 0.092   | 0.133 | 28.936 | 33.140 | 37.890   | 43.250 | 49.290 | 0.086 | 0.142 | 32.233 | 37.263 | 43.000   | 49.535 | 56.966 |
| 14.1   | 0.092   | 0.133 | 29.111 | 33.332 | 38.101   | 43.482 | 49.544 | 0.089 | 0.142 | 32.631 | 37.720 | 43.522   | 50.127 | 57.634 |
| 14.2   | 0.093   | 0.133 | 29.279 | 33.517 | 38.305   | 43.705 | 49.788 | 0.092 | 0.142 | 33.026 | 38.174 | 44.040   | 50.714 | 58.294 |
| 14.3   | 0.093   | 0.132 | 29.441 | 33.696 | 38.500   | 43.919 | 50.021 | 0.094 | 0.142 | 33.420 | 38.624 | 44.553   | 51.294 | 58.946 |
| 14.4   | 0.093   | 0.132 | 29.597 | 33.867 | 38.688   | 44.124 | 50.243 | 0.097 | 0.142 | 33.810 | 39.071 | 45.061   | 51.867 | 59.588 |
| 14.5   | 0.093   | 0.132 | 29.748 | 34.031 | 38.868   | 44.319 | 50.455 | 0.100 | 0.141 | 34.197 | 39.514 | 45.563   | 52.433 | 60.221 |
| 14.6   | 0.093   | 0.132 | 29.892 | 34.189 | 39.040   | 44.506 | 50.657 | 0.103 | 0.141 | 34.581 | 39.951 | 46.058   | 52.990 | 60.844 |
| 14.7   | 0.093   | 0.132 | 30.030 | 34.340 | 39.204   | 44.684 | 50.849 | 0.106 | 0.141 | 34.960 | 40.383 | 46.547   | 53.539 | 61.456 |
| 14.8   | 0.094   | 0.131 | 30.163 | 34.485 | 39.361   | 44.853 | 51.032 | 0.108 | 0.141 | 35.335 | 40.810 | 47.028   | 54.078 | 62.056 |
| 14.9   | 0.094   | 0.131 | 30.290 | 34.623 | 39.510   | 45.015 | 51.205 | 0.111 | 0.141 | 35.705 | 41.230 | 47.502   | 54.608 | 62.644 |
| 15.0   | 0.094   | 0.131 | 30.412 | 34.755 | 39.653   | 45.168 | 51.370 | 0.114 | 0.140 | 36.069 | 41.643 | 47.967   | 55.128 | 63.219 |
| 15.1   | 0.094   | 0.131 | 30.528 | 34.881 | 39.789   | 45.314 | 51.525 | 0.117 | 0.140 | 36.428 | 42.050 | 48.424   | 55.636 | 63.781 |
| 15.2   | 0.094   | 0.131 | 30.639 | 35.001 | 39.918   | 45.452 | 51.672 | 0.120 | 0.140 | 36.781 | 42.449 | 48.871   | 56.133 | 64.329 |
| 15.3   | 0.094   | 0.130 | 30.745 | 35.115 | 40.040   | 45.583 | 51.812 | 0.123 | 0.139 | 37.128 | 42.839 | 49.308   | 56.618 | 64.863 |
| 15.4   | 0.095   | 0.130 | 30.846 | 35.224 | 40.157   | 45.707 | 51.943 | 0.125 | 0.139 | 37.468 | 43.222 | 49.736   | 57.092 | 65.382 |
| 15.5   | 0.095   | 0.130 | 30.943 | 35.327 | 40.267   | 45.824 | 52.067 | 0.128 | 0.139 | 37.801 | 43.597 | 50.153   | 57.553 | 65.887 |
| 15.6   | 0.095   | 0.130 | 31.034 | 35.425 | 40.372   | 45.935 | 52.183 | 0.131 | 0.139 | 38.128 | 43.964 | 50.561   | 58.002 | 66.377 |
| 15.7   | 0.095   | 0.130 | 31.121 | 35.519 | 40.471   | 46.039 | 52.293 | 0.134 | 0.138 | 38.447 | 44.322 | 50.958   | 58.439 | 66.852 |
| 15.8   | 0.095   | 0.130 | 31.204 | 35.607 | 40.564   | 46.138 | 52.396 | 0.137 | 0.138 | 38.760 | 44.671 | 51.345   | 58.863 | 67.313 |
| 15.9   | 0.095   | 0.129 | 31.283 | 35.690 | 40.653   | 46.231 | 52.492 | 0.139 | 0.138 | 39.065 | 45.012 | 51.722   | 59.275 | 67.759 |
| 16.0   | 0.096   | 0.129 | 31.357 | 35.770 | 40.736   | 46.318 | 52.583 | 0.142 | 0.137 | 39.363 | 45.344 | 52.088   | 59.674 | 68.189 |
| 16.1   | 0.096   | 0.129 | 31.428 | 35.845 | 40.815   | 46.400 | 52.668 | 0.145 | 0.137 | 39.653 | 45.667 | 52.443   | 60.060 | 68.605 |
| 16.2   | 0.096   | 0.129 | 31.496 | 35.916 | 40.889   | 46.478 | 52.748 | 0.148 | 0.137 | 39.936 | 45.980 | 52.787   | 60.434 | 69.005 |
| 16.3   | 0.096   | 0.129 | 31.559 | 35.983 | 40.960   | 46.550 | 52.822 | 0.151 | 0.136 | 40.211 | 46.285 | 53.120   | 60.795 | 69.391 |
| 16.4   | 0.096   | 0.129 | 31.620 | 36.046 | 41.026   | 46.619 | 52.892 | 0.154 | 0.136 | 40.479 | 46.581 | 53.443   | 61.143 | 69.761 |
| 16.5   | 0.097   | 0.128 | 31.677 | 36.107 | 41.088   | 46.683 | 52.957 | 0.156 | 0.136 | 40.739 | 46.867 | 53.756   | 61.479 | 70.118 |
| 16.6   | 0.097   | 0.128 | 31.731 | 36.163 | 41.147   | 46.743 | 53.018 | 0.159 | 0.135 | 40.992 | 47.146 | 54.058   | 61.803 | 70.460 |
| 16.7   | 0.097   | 0.128 | 31.783 | 36.217 | 41.203   | 46.800 | 53.076 | 0.162 | 0.135 | 41.238 | 47.415 | 54.349   | 62.114 | 70.788 |
| 16.8   | 0.097   | 0.128 | 31.831 | 36.268 | 41.255   | 46.853 | 53.129 | 0.165 | 0.135 | 41.476 | 47.676 | 54.631   | 62.414 | 71.102 |
| 16.9   | 0.097   | 0.128 | 31.878 | 36.316 | 41.304   | 46.903 | 53.179 | 0.168 | 0.134 | 41.708 | 47.928 | 54.903   | 62.703 | 71.403 |
| 17.0   | 0.097   | 0.128 | 31.921 | 36.361 | 41.350   | 46.950 | 53.225 | 0.170 | 0.134 | 41.932 | 48.172 | 55.165   | 62.979 | 71.691 |
| 17.1   | 0.098   | 0.128 | 31.963 | 36.404 | 41.394   | 46.994 | 53.268 | 0.173 | 0.134 | 42.149 | 48.408 | 55.417   | 63.245 | 71.965 |
| 17.2   | 0.098   | 0.128 | 32.002 | 36.444 | 41.435   | 47.035 | 53.309 | 0.176 | 0.133 | 42.359 | 48.636 | 55.660   | 63.500 | 72.227 |
| 17.3   | 0.098   | 0.127 | 32.039 | 36.482 | 41.474   | 47.073 | 53.346 | 0.179 | 0.133 | 42.562 | 48.856 | 55.894   | 63.744 | 72.477 |

**Table S6. Total Lean Soft Tissue Mass, kg**

| Age, y | Females |       |        |        |          |        |        | Males |       |        |        |          |        |        |
|--------|---------|-------|--------|--------|----------|--------|--------|-------|-------|--------|--------|----------|--------|--------|
|        | L       | S     | -2 SD  | -1 SD  | 0 SD (M) | 1 SD   | 2 SD   | L     | S     | -2 SD  | -1 SD  | 0 SD (M) | 1 SD   | 2 SD   |
| 17.4   | 0.098   | 0.127 | 32.074 | 36.518 | 41.510   | 47.110 | 53.382 | 0.182 | 0.133 | 42.759 | 49.068 | 56.118   | 63.977 | 72.714 |
| 17.5   | 0.098   | 0.127 | 32.108 | 36.552 | 41.545   | 47.144 | 53.414 | 0.185 | 0.132 | 42.949 | 49.272 | 56.334   | 64.200 | 72.940 |
| 17.6   | 0.098   | 0.127 | 32.139 | 36.585 | 41.577   | 47.176 | 53.445 | 0.187 | 0.132 | 43.133 | 49.469 | 56.541   | 64.414 | 73.155 |
| 17.7   | 0.099   | 0.127 | 32.169 | 36.615 | 41.607   | 47.205 | 53.473 | 0.190 | 0.132 | 43.311 | 49.659 | 56.740   | 64.618 | 73.358 |
| 17.8   | 0.099   | 0.127 | 32.198 | 36.644 | 41.636   | 47.233 | 53.499 | 0.193 | 0.131 | 43.484 | 49.842 | 56.931   | 64.812 | 73.551 |
| 17.9   | 0.099   | 0.127 | 32.225 | 36.671 | 41.663   | 47.259 | 53.524 | 0.196 | 0.131 | 43.650 | 50.019 | 57.114   | 64.998 | 73.734 |
| 18.0   | 0.099   | 0.127 | 32.250 | 36.696 | 41.688   | 47.283 | 53.546 | 0.199 | 0.131 | 43.811 | 50.189 | 57.290   | 65.175 | 73.907 |
| 18.1   | 0.099   | 0.127 | 32.274 | 36.721 | 41.712   | 47.306 | 53.567 | 0.201 | 0.130 | 43.966 | 50.352 | 57.459   | 65.344 | 74.070 |
| 18.2   | 0.099   | 0.127 | 32.297 | 36.743 | 41.734   | 47.327 | 53.586 | 0.204 | 0.130 | 44.116 | 50.510 | 57.620   | 65.505 | 74.225 |
| 18.3   | 0.100   | 0.126 | 32.318 | 36.765 | 41.755   | 47.346 | 53.603 | 0.207 | 0.130 | 44.262 | 50.662 | 57.775   | 65.658 | 74.370 |
| 18.4   | 0.100   | 0.126 | 32.339 | 36.785 | 41.774   | 47.364 | 53.619 | 0.210 | 0.129 | 44.402 | 50.808 | 57.923   | 65.803 | 74.507 |
| 18.5   | 0.100   | 0.126 | 32.358 | 36.804 | 41.792   | 47.381 | 53.634 | 0.213 | 0.129 | 44.538 | 50.949 | 58.066   | 65.942 | 74.637 |
| 18.6   | 0.100   | 0.126 | 32.376 | 36.822 | 41.809   | 47.397 | 53.647 | 0.216 | 0.129 | 44.670 | 51.085 | 58.202   | 66.075 | 74.759 |
| 18.7   | 0.100   | 0.126 | 32.393 | 36.838 | 41.825   | 47.411 | 53.660 | 0.218 | 0.128 | 44.797 | 51.217 | 58.333   | 66.201 | 74.874 |
| 18.8   | 0.100   | 0.126 | 32.409 | 36.854 | 41.840   | 47.424 | 53.670 | 0.221 | 0.128 | 44.921 | 51.343 | 58.459   | 66.321 | 74.982 |
| 18.9   | 0.101   | 0.126 | 32.425 | 36.869 | 41.854   | 47.437 | 53.680 | 0.224 | 0.128 | 45.041 | 51.466 | 58.580   | 66.436 | 75.084 |
| 19.0   | 0.101   | 0.126 | 32.439 | 36.883 | 41.867   | 47.448 | 53.689 | 0.227 | 0.127 | 45.158 | 51.585 | 58.697   | 66.545 | 75.181 |
| 19.1   | 0.101   | 0.126 | 32.453 | 36.896 | 41.879   | 47.458 | 53.697 | 0.230 | 0.127 | 45.271 | 51.700 | 58.809   | 66.650 | 75.271 |
| 19.2   | 0.101   | 0.126 | 32.466 | 36.909 | 41.890   | 47.467 | 53.704 | 0.232 | 0.127 | 45.382 | 51.811 | 58.918   | 66.750 | 75.357 |
| 19.3   | 0.101   | 0.126 | 32.479 | 36.920 | 41.900   | 47.476 | 53.710 | 0.235 | 0.126 | 45.489 | 51.919 | 59.022   | 66.845 | 75.438 |
| 19.4   | 0.102   | 0.126 | 32.490 | 36.931 | 41.910   | 47.484 | 53.715 | 0.238 | 0.126 | 45.594 | 52.024 | 59.123   | 66.937 | 75.515 |
| 19.5   | 0.102   | 0.126 | 32.502 | 36.942 | 41.919   | 47.491 | 53.720 | 0.241 | 0.126 | 45.697 | 52.127 | 59.221   | 67.026 | 75.587 |
| 19.6   | 0.102   | 0.126 | 32.512 | 36.951 | 41.928   | 47.498 | 53.723 | 0.244 | 0.125 | 45.797 | 52.227 | 59.316   | 67.111 | 75.656 |
| 19.7   | 0.102   | 0.125 | 32.522 | 36.961 | 41.936   | 47.504 | 53.727 | 0.247 | 0.125 | 45.896 | 52.324 | 59.409   | 67.193 | 75.722 |
| 19.8   | 0.102   | 0.125 | 32.532 | 36.970 | 41.943   | 47.509 | 53.729 | 0.249 | 0.125 | 45.993 | 52.420 | 59.499   | 67.273 | 75.785 |
| 19.9   | 0.102   | 0.125 | 32.542 | 36.978 | 41.950   | 47.514 | 53.731 | 0.252 | 0.124 | 46.088 | 52.514 | 59.587   | 67.350 | 75.845 |
| 20.0   | 0.103   | 0.125 | 32.550 | 36.986 | 41.956   | 47.518 | 53.733 | 0.255 | 0.124 | 46.182 | 52.606 | 59.673   | 67.425 | 75.903 |

**Table S7. Subtotal Lean Soft Tissue Mass, kg**

| Age, y | Females |       |        |        |          |        |        | Males  |       |        |        |          |        |        |
|--------|---------|-------|--------|--------|----------|--------|--------|--------|-------|--------|--------|----------|--------|--------|
|        | L       | S     | -2 SD  | -1 SD  | 0 SD (M) | 1 SD   | 2 SD   | L      | S     | -2 SD  | -1 SD  | 0 SD (M) | 1 SD   | 2 SD   |
| 5.0    | 0.151   | 0.140 | 8.190  | 9.464  | 10.903   | 12.523 | 14.342 | -0.072 | 0.128 | 9.206  | 10.441 | 11.854   | 13.475 | 15.335 |
| 5.1    | 0.151   | 0.140 | 8.329  | 9.626  | 11.091   | 12.742 | 14.596 | -0.070 | 0.128 | 9.352  | 10.610 | 12.051   | 13.704 | 15.601 |
| 5.2    | 0.152   | 0.140 | 8.467  | 9.788  | 11.280   | 12.961 | 14.849 | -0.067 | 0.128 | 9.497  | 10.780 | 12.249   | 13.934 | 15.868 |
| 5.3    | 0.152   | 0.141 | 8.605  | 9.950  | 11.469   | 13.180 | 15.103 | -0.065 | 0.129 | 9.643  | 10.950 | 12.447   | 14.164 | 16.135 |
| 5.4    | 0.152   | 0.141 | 8.743  | 10.111 | 11.657   | 13.399 | 15.356 | -0.062 | 0.129 | 9.788  | 11.120 | 12.645   | 14.394 | 16.403 |
| 5.5    | 0.152   | 0.141 | 8.881  | 10.273 | 11.846   | 13.618 | 15.610 | -0.060 | 0.129 | 9.933  | 11.289 | 12.843   | 14.626 | 16.673 |
| 5.6    | 0.152   | 0.141 | 9.019  | 10.434 | 12.034   | 13.837 | 15.864 | -0.058 | 0.130 | 10.079 | 11.460 | 13.042   | 14.858 | 16.943 |
| 5.7    | 0.153   | 0.141 | 9.156  | 10.596 | 12.223   | 14.057 | 16.119 | -0.055 | 0.130 | 10.224 | 11.630 | 13.241   | 15.090 | 17.214 |
| 5.8    | 0.153   | 0.141 | 9.294  | 10.757 | 12.411   | 14.276 | 16.373 | -0.053 | 0.131 | 10.370 | 11.801 | 13.441   | 15.323 | 17.485 |
| 5.9    | 0.153   | 0.142 | 9.431  | 10.918 | 12.600   | 14.496 | 16.628 | -0.050 | 0.131 | 10.515 | 11.971 | 13.641   | 15.557 | 17.758 |
| 6.0    | 0.153   | 0.142 | 9.568  | 11.080 | 12.789   | 14.715 | 16.883 | -0.048 | 0.131 | 10.661 | 12.143 | 13.842   | 15.792 | 18.033 |
| 6.1    | 0.153   | 0.142 | 9.706  | 11.241 | 12.977   | 14.936 | 17.138 | -0.046 | 0.132 | 10.807 | 12.314 | 14.043   | 16.028 | 18.308 |
| 6.2    | 0.153   | 0.142 | 9.843  | 11.403 | 13.167   | 15.156 | 17.394 | -0.043 | 0.132 | 10.953 | 12.486 | 14.245   | 16.264 | 18.584 |
| 6.3    | 0.154   | 0.142 | 9.981  | 11.565 | 13.356   | 15.377 | 17.651 | -0.041 | 0.133 | 11.099 | 12.658 | 14.448   | 16.502 | 18.862 |
| 6.4    | 0.154   | 0.143 | 10.119 | 11.727 | 13.546   | 15.598 | 17.908 | -0.039 | 0.133 | 11.245 | 12.831 | 14.651   | 16.740 | 19.141 |
| 6.5    | 0.154   | 0.143 | 10.257 | 11.889 | 13.736   | 15.821 | 18.166 | -0.036 | 0.133 | 11.392 | 13.004 | 14.855   | 16.979 | 19.421 |
| 6.6    | 0.154   | 0.143 | 10.395 | 12.052 | 13.927   | 16.043 | 18.425 | -0.034 | 0.134 | 11.538 | 13.178 | 15.059   | 17.220 | 19.702 |
| 6.7    | 0.154   | 0.143 | 10.534 | 12.216 | 14.119   | 16.267 | 18.685 | -0.031 | 0.134 | 11.685 | 13.352 | 15.264   | 17.461 | 19.985 |
| 6.8    | 0.154   | 0.143 | 10.673 | 12.380 | 14.311   | 16.492 | 18.947 | -0.029 | 0.135 | 11.833 | 13.526 | 15.470   | 17.703 | 20.269 |
| 6.9    | 0.155   | 0.144 | 10.813 | 12.545 | 14.505   | 16.717 | 19.209 | -0.027 | 0.135 | 11.980 | 13.701 | 15.677   | 17.946 | 20.554 |
| 7.0    | 0.155   | 0.144 | 10.954 | 12.710 | 14.699   | 16.945 | 19.474 | -0.024 | 0.135 | 12.128 | 13.877 | 15.885   | 18.191 | 20.841 |
| 7.1    | 0.155   | 0.144 | 11.096 | 12.877 | 14.895   | 17.174 | 19.740 | -0.022 | 0.136 | 12.276 | 14.053 | 16.093   | 18.436 | 21.129 |
| 7.2    | 0.155   | 0.144 | 11.239 | 13.046 | 15.093   | 17.405 | 20.009 | -0.019 | 0.136 | 12.425 | 14.229 | 16.302   | 18.682 | 21.419 |
| 7.3    | 0.155   | 0.144 | 11.383 | 13.216 | 15.292   | 17.638 | 20.280 | -0.017 | 0.137 | 12.573 | 14.406 | 16.511   | 18.930 | 21.709 |
| 7.4    | 0.156   | 0.144 | 11.528 | 13.387 | 15.493   | 17.873 | 20.554 | -0.015 | 0.137 | 12.722 | 14.583 | 16.721   | 19.178 | 22.001 |
| 7.5    | 0.156   | 0.145 | 11.675 | 13.561 | 15.697   | 18.111 | 20.831 | -0.012 | 0.137 | 12.871 | 14.761 | 16.932   | 19.427 | 22.295 |
| 7.6    | 0.156   | 0.145 | 11.824 | 13.736 | 15.903   | 18.351 | 21.111 | -0.010 | 0.138 | 13.021 | 14.939 | 17.144   | 19.677 | 22.589 |
| 7.7    | 0.156   | 0.145 | 11.974 | 13.913 | 16.111   | 18.595 | 21.395 | -0.008 | 0.138 | 13.170 | 15.118 | 17.356   | 19.928 | 22.885 |
| 7.8    | 0.156   | 0.145 | 12.127 | 14.094 | 16.323   | 18.842 | 21.682 | -0.005 | 0.139 | 13.320 | 15.297 | 17.569   | 20.180 | 23.182 |
| 7.9    | 0.156   | 0.145 | 12.282 | 14.276 | 16.537   | 19.093 | 21.974 | -0.003 | 0.139 | 13.470 | 15.477 | 17.783   | 20.433 | 23.481 |
| 8.0    | 0.157   | 0.145 | 12.439 | 14.462 | 16.755   | 19.347 | 22.270 | 0.000  | 0.139 | 13.621 | 15.657 | 17.997   | 20.688 | 23.781 |
| 8.1    | 0.157   | 0.146 | 12.600 | 14.651 | 16.977   | 19.606 | 22.571 | 0.002  | 0.140 | 13.772 | 15.838 | 18.213   | 20.944 | 24.083 |
| 8.2    | 0.157   | 0.146 | 12.763 | 14.843 | 17.202   | 19.870 | 22.878 | 0.004  | 0.140 | 13.924 | 16.020 | 18.430   | 21.201 | 24.387 |
| 8.3    | 0.157   | 0.146 | 12.929 | 15.039 | 17.432   | 20.138 | 23.190 | 0.007  | 0.140 | 14.077 | 16.203 | 18.649   | 21.460 | 24.692 |
| 8.4    | 0.157   | 0.146 | 13.098 | 15.238 | 17.665   | 20.411 | 23.507 | 0.009  | 0.141 | 14.230 | 16.387 | 18.868   | 21.721 | 25.000 |
| 8.5    | 0.157   | 0.146 | 13.271 | 15.442 | 17.904   | 20.689 | 23.831 | 0.012  | 0.141 | 14.384 | 16.573 | 19.090   | 21.984 | 25.311 |
| 8.6    | 0.158   | 0.146 | 13.447 | 15.649 | 18.147   | 20.973 | 24.161 | 0.014  | 0.142 | 14.540 | 16.759 | 19.313   | 22.249 | 25.624 |
| 8.7    | 0.158   | 0.147 | 13.627 | 15.861 | 18.396   | 21.263 | 24.498 | 0.016  | 0.142 | 14.696 | 16.947 | 19.537   | 22.515 | 25.939 |
| 8.8    | 0.158   | 0.147 | 13.811 | 16.078 | 18.649   | 21.559 | 24.841 | 0.019  | 0.142 | 14.854 | 17.137 | 19.764   | 22.785 | 26.258 |
| 8.9    | 0.158   | 0.147 | 13.999 | 16.299 | 18.908   | 21.860 | 25.191 | 0.021  | 0.143 | 15.013 | 17.329 | 19.993   | 23.057 | 26.579 |
| 9.0    | 0.158   | 0.147 | 14.191 | 16.524 | 19.172   | 22.168 | 25.548 | 0.024  | 0.143 | 15.174 | 17.523 | 20.225   | 23.333 | 26.905 |
| 9.1    | 0.159   | 0.147 | 14.388 | 16.755 | 19.442   | 22.482 | 25.913 | 0.026  | 0.144 | 15.337 | 17.719 | 20.460   | 23.611 | 27.234 |
| 9.2    | 0.159   | 0.147 | 14.588 | 16.991 | 19.717   | 22.803 | 26.285 | 0.028  | 0.144 | 15.502 | 17.918 | 20.697   | 23.894 | 27.568 |
| 9.3    | 0.159   | 0.147 | 14.794 | 17.231 | 19.998   | 23.130 | 26.664 | 0.031  | 0.144 | 15.670 | 18.120 | 20.939   | 24.181 | 27.907 |
| 9.4    | 0.159   | 0.147 | 15.003 | 17.477 | 20.286   | 23.464 | 27.051 | 0.033  | 0.145 | 15.840 | 18.324 | 21.183   | 24.472 | 28.251 |
| 9.5    | 0.159   | 0.147 | 15.218 | 17.729 | 20.579   | 23.805 | 27.446 | 0.035  | 0.145 | 16.013 | 18.533 | 21.432   | 24.767 | 28.600 |
| 9.6    | 0.159   | 0.147 | 15.437 | 17.985 | 20.878   | 24.152 | 27.848 | 0.038  | 0.145 | 16.189 | 18.744 | 21.685   | 25.068 | 28.955 |
| 9.7    | 0.160   | 0.147 | 15.660 | 18.246 | 21.182   | 24.506 | 28.257 | 0.040  | 0.146 | 16.368 | 18.960 | 21.943   | 25.374 | 29.316 |
| 9.8    | 0.160   | 0.147 | 15.887 | 18.512 | 21.492   | 24.865 | 28.673 | 0.043  | 0.146 | 16.551 | 19.180 | 22.206   | 25.685 | 29.684 |
| 9.9    | 0.160   | 0.148 | 16.119 | 18.783 | 21.808   | 25.231 | 29.096 | 0.045  | 0.146 | 16.738 | 19.404 | 22.474   | 26.003 | 30.059 |
| 10.0   | 0.160   | 0.148 | 16.355 | 19.059 | 22.129   | 25.603 | 29.525 | 0.047  | 0.147 | 16.929 | 19.634 | 22.747   | 26.328 | 30.441 |
| 10.1   | 0.160   | 0.148 | 16.596 | 19.340 | 22.455   | 25.981 | 29.961 | 0.050  | 0.147 | 17.124 | 19.868 | 23.027   | 26.659 | 30.832 |
| 10.2   | 0.161   | 0.148 | 16.840 | 19.625 | 22.786   | 26.365 | 30.404 | 0.052  | 0.147 | 17.324 | 20.108 | 23.313   | 26.998 | 31.231 |
| 10.3   | 0.161   | 0.148 | 17.089 | 19.915 | 23.123   | 26.754 | 30.852 | 0.055  | 0.148 | 17.528 | 20.353 | 23.605   | 27.344 | 31.639 |
| 10.4   | 0.161   | 0.148 | 17.341 | 20.208 | 23.464   | 27.148 | 31.306 | 0.057  | 0.148 | 17.738 | 20.605 | 23.905   | 27.699 | 32.056 |
| 10.5   | 0.161   | 0.148 | 17.596 | 20.506 | 23.808   | 27.546 | 31.764 | 0.059  | 0.148 | 17.954 | 20.864 | 24.213   | 28.062 | 32.483 |
| 10.6   | 0.161   | 0.148 | 17.855 | 20.807 | 24.157   | 27.948 | 32.227 | 0.062  | 0.148 | 18.175 | 21.128 | 24.528   | 28.435 | 32.920 |
| 10.7   | 0.161   | 0.147 | 18.117 | 21.111 | 24.509   | 28.354 | 32.693 | 0.064  | 0.149 | 18.402 | 21.400 | 24.851   | 28.816 | 33.368 |
| 10.8   | 0.162   | 0.147 | 18.381 | 21.417 | 24.863   | 28.762 | 33.162 | 0.067  | 0.149 | 18.636 | 21.679 | 25.182   | 29.207 | 33.827 |
| 10.9   | 0.162   | 0.147 | 18.648 | 21.726 | 25.220   | 29.173 | 33.633 | 0.069  | 0.149 | 18.875 | 21.965 | 25.521   | 29.607 | 34.296 |
| 11.0   | 0.162   | 0.147 | 18.916 | 22.037 | 25.579   | 29.586 | 34.106 | 0.071  | 0.150 | 19.121 | 22.259 | 25.870   | 30.018 | 34.777 |
| 11.1   | 0.162   | 0.147 | 19.186 | 22.350 | 25.940   | 30.000 | 34.581 | 0.074  | 0.150 | 19.374 | 22.561 | 26.227   | 30.438 | 35.269 |

**Table S7. Subtotal Lean Soft Tissue Mass, kg**

| Age, y | Females |       |        |        |          |        |        | Males |       |        |        |          |        |        |
|--------|---------|-------|--------|--------|----------|--------|--------|-------|-------|--------|--------|----------|--------|--------|
|        | L       | S     | -2 SD  | -1 SD  | 0 SD (M) | 1 SD   | 2 SD   | L     | S     | -2 SD  | -1 SD  | 0 SD (M) | 1 SD   | 2 SD   |
| 11.2   | 0.162   | 0.147 | 19.458 | 22.664 | 26.302   | 30.416 | 35.056 | 0.076 | 0.150 | 19.634 | 22.870 | 26.593   | 30.869 | 35.773 |
| 11.3   | 0.162   | 0.147 | 19.731 | 22.979 | 26.664   | 30.831 | 35.530 | 0.078 | 0.150 | 19.901 | 23.187 | 26.968   | 31.310 | 36.289 |
| 11.4   | 0.163   | 0.147 | 20.004 | 23.294 | 27.026   | 31.246 | 36.004 | 0.081 | 0.150 | 20.174 | 23.513 | 27.353   | 31.763 | 36.817 |
| 11.5   | 0.163   | 0.147 | 20.277 | 23.609 | 27.387   | 31.659 | 36.476 | 0.083 | 0.151 | 20.456 | 23.848 | 27.748   | 32.226 | 37.357 |
| 11.6   | 0.163   | 0.147 | 20.550 | 23.923 | 27.748   | 32.071 | 36.945 | 0.086 | 0.151 | 20.744 | 24.190 | 28.152   | 32.700 | 37.910 |
| 11.7   | 0.163   | 0.146 | 20.823 | 24.236 | 28.106   | 32.481 | 37.411 | 0.088 | 0.151 | 21.040 | 24.541 | 28.566   | 33.184 | 38.473 |
| 11.8   | 0.163   | 0.146 | 21.094 | 24.548 | 28.463   | 32.887 | 37.873 | 0.090 | 0.151 | 21.343 | 24.900 | 28.988   | 33.678 | 39.049 |
| 11.9   | 0.164   | 0.146 | 21.364 | 24.857 | 28.816   | 33.290 | 38.330 | 0.093 | 0.151 | 21.652 | 25.266 | 29.419   | 34.182 | 39.635 |
| 12.0   | 0.164   | 0.146 | 21.632 | 25.164 | 29.167   | 33.688 | 38.781 | 0.095 | 0.151 | 21.969 | 25.640 | 29.859   | 34.696 | 40.232 |
| 12.1   | 0.164   | 0.146 | 21.898 | 25.468 | 29.513   | 34.081 | 39.227 | 0.098 | 0.151 | 22.291 | 26.022 | 30.307   | 35.219 | 40.838 |
| 12.2   | 0.164   | 0.145 | 22.161 | 25.769 | 29.855   | 34.470 | 39.665 | 0.100 | 0.151 | 22.621 | 26.411 | 30.763   | 35.751 | 41.455 |
| 12.3   | 0.164   | 0.145 | 22.422 | 26.066 | 30.193   | 34.852 | 40.097 | 0.102 | 0.151 | 22.957 | 26.807 | 31.227   | 36.291 | 42.081 |
| 12.4   | 0.164   | 0.145 | 22.679 | 26.359 | 30.525   | 35.228 | 40.521 | 0.105 | 0.151 | 23.298 | 27.210 | 31.699   | 36.840 | 42.716 |
| 12.5   | 0.165   | 0.145 | 22.933 | 26.648 | 30.852   | 35.597 | 40.937 | 0.107 | 0.152 | 23.646 | 27.619 | 32.178   | 37.397 | 43.359 |
| 12.6   | 0.165   | 0.145 | 23.183 | 26.932 | 31.173   | 35.959 | 41.344 | 0.109 | 0.152 | 24.000 | 28.035 | 32.663   | 37.960 | 44.009 |
| 12.7   | 0.165   | 0.144 | 23.429 | 27.210 | 31.488   | 36.314 | 41.742 | 0.112 | 0.152 | 24.358 | 28.456 | 33.155   | 38.530 | 44.666 |
| 12.8   | 0.165   | 0.144 | 23.670 | 27.483 | 31.796   | 36.660 | 42.129 | 0.114 | 0.152 | 24.721 | 28.882 | 33.651   | 39.105 | 45.329 |
| 12.9   | 0.165   | 0.144 | 23.907 | 27.750 | 32.097   | 36.997 | 42.507 | 0.117 | 0.151 | 25.089 | 29.312 | 34.153   | 39.686 | 45.996 |
| 13.0   | 0.165   | 0.144 | 24.138 | 28.012 | 32.390   | 37.326 | 42.874 | 0.119 | 0.151 | 25.460 | 29.747 | 34.658   | 40.270 | 46.667 |
| 13.1   | 0.166   | 0.143 | 24.365 | 28.267 | 32.676   | 37.646 | 43.231 | 0.121 | 0.151 | 25.835 | 30.186 | 35.168   | 40.858 | 47.342 |
| 13.2   | 0.166   | 0.143 | 24.586 | 28.515 | 32.955   | 37.957 | 43.577 | 0.124 | 0.151 | 26.213 | 30.627 | 35.680   | 41.448 | 48.018 |
| 13.3   | 0.166   | 0.143 | 24.802 | 28.758 | 33.226   | 38.259 | 43.913 | 0.126 | 0.151 | 26.593 | 31.071 | 36.194   | 42.041 | 48.696 |
| 13.4   | 0.166   | 0.142 | 25.012 | 28.993 | 33.489   | 38.552 | 44.237 | 0.129 | 0.151 | 26.976 | 31.517 | 36.711   | 42.634 | 49.375 |
| 13.5   | 0.166   | 0.142 | 25.217 | 29.222 | 33.744   | 38.835 | 44.551 | 0.131 | 0.151 | 27.361 | 31.965 | 37.228   | 43.228 | 50.052 |
| 13.6   | 0.167   | 0.142 | 25.416 | 29.444 | 33.991   | 39.109 | 44.853 | 0.133 | 0.151 | 27.747 | 32.413 | 37.746   | 43.822 | 50.728 |
| 13.7   | 0.167   | 0.142 | 25.609 | 29.659 | 34.230   | 39.373 | 45.145 | 0.136 | 0.151 | 28.133 | 32.862 | 38.263   | 44.414 | 51.402 |
| 13.8   | 0.167   | 0.141 | 25.796 | 29.867 | 34.461   | 39.628 | 45.425 | 0.138 | 0.150 | 28.520 | 33.310 | 38.779   | 45.004 | 52.072 |
| 13.9   | 0.167   | 0.141 | 25.977 | 30.069 | 34.683   | 39.873 | 45.694 | 0.141 | 0.150 | 28.906 | 33.758 | 39.293   | 45.591 | 52.738 |
| 14.0   | 0.167   | 0.141 | 26.153 | 30.263 | 34.897   | 40.109 | 45.952 | 0.143 | 0.150 | 29.292 | 34.204 | 39.805   | 46.174 | 53.398 |
| 14.1   | 0.167   | 0.141 | 26.322 | 30.450 | 35.104   | 40.335 | 46.200 | 0.145 | 0.150 | 29.677 | 34.647 | 40.313   | 46.753 | 54.052 |
| 14.2   | 0.168   | 0.140 | 26.485 | 30.631 | 35.302   | 40.552 | 46.437 | 0.148 | 0.150 | 30.059 | 35.088 | 40.818   | 47.326 | 54.698 |
| 14.3   | 0.168   | 0.140 | 26.643 | 30.804 | 35.493   | 40.761 | 46.663 | 0.150 | 0.149 | 30.439 | 35.526 | 41.317   | 47.893 | 55.337 |
| 14.4   | 0.168   | 0.140 | 26.795 | 30.971 | 35.676   | 40.960 | 46.880 | 0.152 | 0.149 | 30.817 | 35.960 | 41.812   | 48.452 | 55.966 |
| 14.5   | 0.168   | 0.139 | 26.941 | 31.132 | 35.851   | 41.151 | 47.086 | 0.155 | 0.149 | 31.191 | 36.389 | 42.301   | 49.005 | 56.586 |
| 14.6   | 0.168   | 0.139 | 27.082 | 31.286 | 36.019   | 41.333 | 47.283 | 0.157 | 0.149 | 31.562 | 36.814 | 42.783   | 49.549 | 57.195 |
| 14.7   | 0.168   | 0.139 | 27.217 | 31.433 | 36.179   | 41.506 | 47.470 | 0.160 | 0.148 | 31.929 | 37.233 | 43.259   | 50.085 | 57.794 |
| 14.8   | 0.169   | 0.139 | 27.346 | 31.574 | 36.332   | 41.671 | 47.648 | 0.162 | 0.148 | 32.291 | 37.647 | 43.728   | 50.612 | 58.381 |
| 14.9   | 0.169   | 0.138 | 27.470 | 31.709 | 36.478   | 41.829 | 47.816 | 0.164 | 0.148 | 32.649 | 38.055 | 44.189   | 51.129 | 58.956 |
| 15.0   | 0.169   | 0.138 | 27.589 | 31.838 | 36.617   | 41.978 | 47.976 | 0.167 | 0.147 | 33.002 | 38.456 | 44.642   | 51.636 | 59.519 |
| 15.1   | 0.169   | 0.138 | 27.702 | 31.961 | 36.750   | 42.121 | 48.128 | 0.169 | 0.147 | 33.349 | 38.851 | 45.086   | 52.132 | 60.069 |
| 15.2   | 0.169   | 0.138 | 27.811 | 32.078 | 36.876   | 42.255 | 48.271 | 0.172 | 0.147 | 33.691 | 39.238 | 45.522   | 52.617 | 60.605 |
| 15.3   | 0.170   | 0.138 | 27.915 | 32.190 | 36.996   | 42.383 | 48.406 | 0.174 | 0.146 | 34.026 | 39.618 | 45.947   | 53.090 | 61.126 |
| 15.4   | 0.170   | 0.137 | 28.014 | 32.297 | 37.110   | 42.504 | 48.534 | 0.176 | 0.146 | 34.355 | 39.989 | 46.363   | 53.552 | 61.634 |
| 15.5   | 0.170   | 0.137 | 28.108 | 32.398 | 37.218   | 42.618 | 48.654 | 0.179 | 0.146 | 34.678 | 40.353 | 46.770   | 54.002 | 62.127 |
| 15.6   | 0.170   | 0.137 | 28.197 | 32.494 | 37.320   | 42.726 | 48.767 | 0.181 | 0.145 | 34.994 | 40.709 | 47.166   | 54.440 | 62.607 |
| 15.7   | 0.170   | 0.137 | 28.283 | 32.585 | 37.417   | 42.828 | 48.874 | 0.183 | 0.145 | 35.304 | 41.056 | 47.553   | 54.865 | 63.071 |
| 15.8   | 0.170   | 0.136 | 28.364 | 32.671 | 37.508   | 42.924 | 48.974 | 0.186 | 0.145 | 35.606 | 41.396 | 47.929   | 55.279 | 63.521 |
| 15.9   | 0.171   | 0.136 | 28.441 | 32.754 | 37.595   | 43.015 | 49.068 | 0.188 | 0.144 | 35.902 | 41.726 | 48.296   | 55.680 | 63.956 |
| 16.0   | 0.171   | 0.136 | 28.514 | 32.831 | 37.676   | 43.100 | 49.156 | 0.191 | 0.144 | 36.191 | 42.049 | 48.651   | 56.069 | 64.377 |
| 16.1   | 0.171   | 0.136 | 28.584 | 32.905 | 37.754   | 43.181 | 49.239 | 0.193 | 0.143 | 36.472 | 42.362 | 48.997   | 56.446 | 64.783 |
| 16.2   | 0.171   | 0.136 | 28.650 | 32.975 | 37.827   | 43.256 | 49.316 | 0.195 | 0.143 | 36.746 | 42.667 | 49.331   | 56.809 | 65.174 |
| 16.3   | 0.171   | 0.135 | 28.713 | 33.041 | 37.895   | 43.327 | 49.389 | 0.198 | 0.143 | 37.013 | 42.962 | 49.656   | 57.161 | 65.550 |
| 16.4   | 0.172   | 0.135 | 28.772 | 33.103 | 37.960   | 43.394 | 49.457 | 0.200 | 0.142 | 37.272 | 43.249 | 49.970   | 57.500 | 65.912 |
| 16.5   | 0.172   | 0.135 | 28.829 | 33.162 | 38.022   | 43.457 | 49.520 | 0.203 | 0.142 | 37.525 | 43.528 | 50.273   | 57.827 | 66.259 |
| 16.6   | 0.172   | 0.135 | 28.882 | 33.218 | 38.079   | 43.516 | 49.579 | 0.205 | 0.142 | 37.770 | 43.798 | 50.567   | 58.142 | 66.593 |
| 16.7   | 0.172   | 0.135 | 28.933 | 33.271 | 38.134   | 43.571 | 49.635 | 0.207 | 0.141 | 38.008 | 44.060 | 50.850   | 58.446 | 66.913 |
| 16.8   | 0.172   | 0.135 | 28.981 | 33.321 | 38.185   | 43.623 | 49.687 | 0.210 | 0.141 | 38.240 | 44.313 | 51.124   | 58.737 | 67.220 |
| 16.9   | 0.172   | 0.135 | 29.027 | 33.368 | 38.233   | 43.672 | 49.735 | 0.212 | 0.140 | 38.464 | 44.558 | 51.388   | 59.018 | 67.513 |
| 17.0   | 0.173   | 0.134 | 29.070 | 33.412 | 38.279   | 43.717 | 49.780 | 0.215 | 0.140 | 38.681 | 44.795 | 51.643   | 59.287 | 67.793 |
| 17.1   | 0.173   | 0.134 | 29.111 | 33.455 | 38.322   | 43.760 | 49.822 | 0.217 | 0.140 | 38.892 | 45.024 | 51.888   | 59.545 | 68.061 |
| 17.2   | 0.173   | 0.134 | 29.149 | 33.495 | 38.362   | 43.800 | 49.861 | 0.219 | 0.139 | 39.096 | 45.245 | 52.123   | 59.793 | 68.316 |
| 17.3   | 0.173   | 0.134 | 29.186 | 33.532 | 38.400   | 43.838 | 49.898 | 0.222 | 0.139 | 39.293 | 45.458 | 52.350   | 60.029 | 68.558 |

**Table S7. Subtotal Lean Soft Tissue Mass, kg**

| Age, y | Females |       |        |        |          |        |        | Males |       |        |        |          |        |        |
|--------|---------|-------|--------|--------|----------|--------|--------|-------|-------|--------|--------|----------|--------|--------|
|        | L       | S     | -2 SD  | -1 SD  | 0 SD (M) | 1 SD   | 2 SD   | L     | S     | -2 SD  | -1 SD  | 0 SD (M) | 1 SD   | 2 SD   |
| 17.4   | 0.173   | 0.134 | 29.221 | 33.568 | 38.436   | 43.874 | 49.932 | 0.224 | 0.139 | 39.484 | 45.664 | 52.568   | 60.256 | 68.790 |
| 17.5   | 0.173   | 0.134 | 29.255 | 33.602 | 38.470   | 43.907 | 49.964 | 0.226 | 0.138 | 39.669 | 45.862 | 52.777   | 60.473 | 69.009 |
| 17.6   | 0.174   | 0.134 | 29.286 | 33.634 | 38.502   | 43.938 | 49.993 | 0.229 | 0.138 | 39.848 | 46.053 | 52.978   | 60.680 | 69.218 |
| 17.7   | 0.174   | 0.133 | 29.316 | 33.664 | 38.532   | 43.967 | 50.021 | 0.231 | 0.137 | 40.021 | 46.238 | 53.171   | 60.878 | 69.416 |
| 17.8   | 0.174   | 0.133 | 29.344 | 33.693 | 38.560   | 43.994 | 50.046 | 0.234 | 0.137 | 40.188 | 46.415 | 53.357   | 61.067 | 69.603 |
| 17.9   | 0.174   | 0.133 | 29.371 | 33.719 | 38.587   | 44.020 | 50.070 | 0.236 | 0.137 | 40.350 | 46.587 | 53.534   | 61.247 | 69.781 |
| 18.0   | 0.174   | 0.133 | 29.396 | 33.745 | 38.612   | 44.044 | 50.092 | 0.238 | 0.136 | 40.506 | 46.751 | 53.704   | 61.418 | 69.949 |
| 18.1   | 0.175   | 0.133 | 29.420 | 33.769 | 38.635   | 44.066 | 50.112 | 0.241 | 0.136 | 40.657 | 46.910 | 53.868   | 61.582 | 70.107 |
| 18.2   | 0.175   | 0.133 | 29.443 | 33.792 | 38.657   | 44.087 | 50.131 | 0.243 | 0.136 | 40.803 | 47.063 | 54.024   | 61.737 | 70.257 |
| 18.3   | 0.175   | 0.133 | 29.465 | 33.813 | 38.678   | 44.106 | 50.148 | 0.246 | 0.135 | 40.944 | 47.210 | 54.174   | 61.886 | 70.398 |
| 18.4   | 0.175   | 0.133 | 29.485 | 33.833 | 38.697   | 44.124 | 50.164 | 0.248 | 0.135 | 41.081 | 47.352 | 54.318   | 62.027 | 70.531 |
| 18.5   | 0.175   | 0.133 | 29.505 | 33.852 | 38.715   | 44.141 | 50.178 | 0.250 | 0.135 | 41.213 | 47.489 | 54.455   | 62.161 | 70.656 |
| 18.6   | 0.175   | 0.133 | 29.523 | 33.870 | 38.732   | 44.156 | 50.191 | 0.253 | 0.134 | 41.341 | 47.621 | 54.587   | 62.289 | 70.774 |
| 18.7   | 0.176   | 0.132 | 29.540 | 33.887 | 38.748   | 44.170 | 50.203 | 0.255 | 0.134 | 41.466 | 47.748 | 54.714   | 62.410 | 70.885 |
| 18.8   | 0.176   | 0.132 | 29.557 | 33.903 | 38.763   | 44.184 | 50.214 | 0.258 | 0.133 | 41.586 | 47.871 | 54.836   | 62.526 | 70.990 |
| 18.9   | 0.176   | 0.132 | 29.573 | 33.919 | 38.778   | 44.196 | 50.224 | 0.260 | 0.133 | 41.703 | 47.990 | 54.953   | 62.637 | 71.089 |
| 19.0   | 0.176   | 0.132 | 29.588 | 33.933 | 38.791   | 44.208 | 50.233 | 0.262 | 0.133 | 41.816 | 48.105 | 55.066   | 62.743 | 71.181 |
| 19.1   | 0.176   | 0.132 | 29.602 | 33.946 | 38.803   | 44.218 | 50.241 | 0.265 | 0.132 | 41.927 | 48.217 | 55.174   | 62.843 | 71.269 |
| 19.2   | 0.176   | 0.132 | 29.616 | 33.959 | 38.815   | 44.228 | 50.248 | 0.267 | 0.132 | 42.035 | 48.325 | 55.279   | 62.940 | 71.351 |
| 19.3   | 0.177   | 0.132 | 29.629 | 33.972 | 38.826   | 44.237 | 50.254 | 0.269 | 0.132 | 42.139 | 48.430 | 55.380   | 63.032 | 71.429 |
| 19.4   | 0.177   | 0.132 | 29.641 | 33.983 | 38.836   | 44.245 | 50.260 | 0.272 | 0.131 | 42.242 | 48.532 | 55.478   | 63.121 | 71.503 |
| 19.5   | 0.177   | 0.132 | 29.653 | 33.994 | 38.846   | 44.253 | 50.265 | 0.274 | 0.131 | 42.342 | 48.631 | 55.572   | 63.206 | 71.573 |
| 19.6   | 0.177   | 0.132 | 29.664 | 34.005 | 38.855   | 44.260 | 50.270 | 0.277 | 0.131 | 42.440 | 48.728 | 55.664   | 63.288 | 71.639 |
| 19.7   | 0.177   | 0.132 | 29.675 | 34.015 | 38.863   | 44.267 | 50.273 | 0.279 | 0.130 | 42.536 | 48.823 | 55.753   | 63.367 | 71.702 |
| 19.8   | 0.178   | 0.132 | 29.685 | 34.024 | 38.871   | 44.273 | 50.277 | 0.281 | 0.130 | 42.630 | 48.915 | 55.840   | 63.443 | 71.763 |
| 19.9   | 0.178   | 0.132 | 29.695 | 34.033 | 38.879   | 44.278 | 50.280 | 0.284 | 0.130 | 42.723 | 49.006 | 55.925   | 63.517 | 71.820 |
| 20.0   | 0.178   | 0.131 | 29.705 | 34.042 | 38.886   | 44.284 | 50.282 | 0.286 | 0.129 | 42.814 | 49.095 | 56.008   | 63.589 | 71.876 |

**Table S8. Appendicular Lean Soft Tissue Mass, kg**

| Age, y | Females |       |       |        |          |        |        | Males  |       |       |        |          |        |        |
|--------|---------|-------|-------|--------|----------|--------|--------|--------|-------|-------|--------|----------|--------|--------|
|        | L       | S     | -2 SD | -1 SD  | 0 SD (M) | 1 SD   | 2 SD   | L      | S     | -2 SD | -1 SD  | 0 SD (M) | 1 SD   | 2 SD   |
| 5.0    | 0.349   | 0.164 | 3.375 | 4.040  | 4.785    | 5.614  | 6.532  | 0.122  | 0.148 | 3.943 | 4.590  | 5.329    | 6.169  | 7.124  |
| 5.1    | 0.347   | 0.164 | 3.445 | 4.124  | 4.885    | 5.732  | 6.669  | 0.118  | 0.148 | 4.015 | 4.675  | 5.428    | 6.287  | 7.263  |
| 5.2    | 0.345   | 0.164 | 3.516 | 4.208  | 4.984    | 5.849  | 6.807  | 0.115  | 0.148 | 4.087 | 4.759  | 5.528    | 6.404  | 7.402  |
| 5.3    | 0.343   | 0.165 | 3.586 | 4.292  | 5.084    | 5.967  | 6.944  | 0.111  | 0.149 | 4.159 | 4.844  | 5.628    | 6.522  | 7.541  |
| 5.4    | 0.341   | 0.165 | 3.657 | 4.377  | 5.184    | 6.084  | 7.082  | 0.107  | 0.149 | 4.231 | 4.929  | 5.728    | 6.641  | 7.682  |
| 5.5    | 0.339   | 0.165 | 3.727 | 4.461  | 5.284    | 6.202  | 7.219  | 0.104  | 0.149 | 4.303 | 5.014  | 5.829    | 6.760  | 7.823  |
| 5.6    | 0.337   | 0.165 | 3.798 | 4.545  | 5.384    | 6.320  | 7.357  | 0.100  | 0.150 | 4.376 | 5.100  | 5.930    | 6.880  | 7.965  |
| 5.7    | 0.334   | 0.165 | 3.868 | 4.629  | 5.484    | 6.437  | 7.495  | 0.097  | 0.150 | 4.449 | 5.186  | 6.032    | 7.001  | 8.108  |
| 5.8    | 0.332   | 0.165 | 3.939 | 4.714  | 5.584    | 6.555  | 7.633  | 0.093  | 0.150 | 4.522 | 5.273  | 6.135    | 7.123  | 8.252  |
| 5.9    | 0.330   | 0.165 | 4.010 | 4.798  | 5.684    | 6.673  | 7.771  | 0.089  | 0.151 | 4.596 | 5.360  | 6.238    | 7.245  | 8.398  |
| 6.0    | 0.328   | 0.165 | 4.080 | 4.882  | 5.784    | 6.791  | 7.909  | 0.086  | 0.151 | 4.671 | 5.448  | 6.342    | 7.368  | 8.544  |
| 6.1    | 0.326   | 0.165 | 4.151 | 4.967  | 5.884    | 6.909  | 8.048  | 0.082  | 0.151 | 4.745 | 5.536  | 6.446    | 7.492  | 8.692  |
| 6.2    | 0.324   | 0.165 | 4.222 | 5.052  | 5.985    | 7.028  | 8.187  | 0.079  | 0.152 | 4.820 | 5.625  | 6.551    | 7.617  | 8.840  |
| 6.3    | 0.322   | 0.165 | 4.294 | 5.137  | 6.085    | 7.146  | 8.326  | 0.075  | 0.152 | 4.896 | 5.714  | 6.657    | 7.743  | 8.990  |
| 6.4    | 0.320   | 0.165 | 4.365 | 5.222  | 6.187    | 7.266  | 8.466  | 0.071  | 0.152 | 4.971 | 5.804  | 6.764    | 7.870  | 9.141  |
| 6.5    | 0.318   | 0.165 | 4.437 | 5.307  | 6.288    | 7.385  | 8.606  | 0.068  | 0.153 | 5.048 | 5.894  | 6.871    | 7.997  | 9.294  |
| 6.6    | 0.316   | 0.165 | 4.509 | 5.393  | 6.390    | 7.505  | 8.747  | 0.064  | 0.153 | 5.124 | 5.985  | 6.979    | 8.126  | 9.447  |
| 6.7    | 0.314   | 0.165 | 4.581 | 5.479  | 6.492    | 7.626  | 8.888  | 0.061  | 0.153 | 5.202 | 6.076  | 7.087    | 8.255  | 9.602  |
| 6.8    | 0.312   | 0.165 | 4.654 | 5.566  | 6.594    | 7.747  | 9.031  | 0.057  | 0.154 | 5.279 | 6.168  | 7.197    | 8.386  | 9.758  |
| 6.9    | 0.310   | 0.165 | 4.727 | 5.653  | 6.698    | 7.869  | 9.174  | 0.054  | 0.154 | 5.357 | 6.260  | 7.307    | 8.517  | 9.916  |
| 7.0    | 0.308   | 0.165 | 4.800 | 5.741  | 6.802    | 7.991  | 9.318  | 0.050  | 0.154 | 5.435 | 6.353  | 7.417    | 8.649  | 10.074 |
| 7.1    | 0.306   | 0.165 | 4.874 | 5.829  | 6.906    | 8.115  | 9.463  | 0.046  | 0.155 | 5.514 | 6.447  | 7.528    | 8.782  | 10.233 |
| 7.2    | 0.304   | 0.165 | 4.949 | 5.918  | 7.012    | 8.239  | 9.609  | 0.043  | 0.155 | 5.593 | 6.540  | 7.640    | 8.916  | 10.394 |
| 7.3    | 0.302   | 0.165 | 5.024 | 6.008  | 7.119    | 8.365  | 9.757  | 0.039  | 0.155 | 5.672 | 6.634  | 7.752    | 9.050  | 10.555 |
| 7.4    | 0.300   | 0.165 | 5.101 | 6.099  | 7.226    | 8.492  | 9.906  | 0.036  | 0.156 | 5.751 | 6.728  | 7.864    | 9.184  | 10.717 |
| 7.5    | 0.297   | 0.165 | 5.178 | 6.190  | 7.335    | 8.620  | 10.056 | 0.032  | 0.156 | 5.830 | 6.822  | 7.977    | 9.319  | 10.879 |
| 7.6    | 0.295   | 0.165 | 5.255 | 6.283  | 7.445    | 8.750  | 10.209 | 0.029  | 0.156 | 5.909 | 6.916  | 8.089    | 9.455  | 11.043 |
| 7.7    | 0.293   | 0.165 | 5.334 | 6.377  | 7.556    | 8.881  | 10.363 | 0.026  | 0.157 | 5.988 | 7.011  | 8.202    | 9.590  | 11.206 |
| 7.8    | 0.291   | 0.166 | 5.414 | 6.472  | 7.669    | 9.014  | 10.519 | 0.022  | 0.157 | 6.068 | 7.105  | 8.315    | 9.726  | 11.371 |
| 7.9    | 0.289   | 0.166 | 5.495 | 6.568  | 7.783    | 9.149  | 10.677 | 0.019  | 0.157 | 6.147 | 7.199  | 8.428    | 9.863  | 11.535 |
| 8.0    | 0.287   | 0.166 | 5.577 | 6.666  | 7.898    | 9.285  | 10.837 | 0.015  | 0.158 | 6.226 | 7.294  | 8.542    | 9.999  | 11.701 |
| 8.1    | 0.285   | 0.166 | 5.661 | 6.765  | 8.016    | 9.424  | 11.000 | 0.012  | 0.158 | 6.306 | 7.389  | 8.656    | 10.137 | 11.867 |
| 8.2    | 0.283   | 0.166 | 5.745 | 6.866  | 8.135    | 9.564  | 11.165 | 0.009  | 0.158 | 6.385 | 7.484  | 8.770    | 10.274 | 12.034 |
| 8.3    | 0.281   | 0.166 | 5.832 | 6.968  | 8.256    | 9.707  | 11.333 | 0.005  | 0.159 | 6.465 | 7.579  | 8.884    | 10.413 | 12.203 |
| 8.4    | 0.279   | 0.166 | 5.919 | 7.073  | 8.380    | 9.853  | 11.504 | 0.002  | 0.159 | 6.545 | 7.675  | 8.999    | 10.552 | 12.372 |
| 8.5    | 0.277   | 0.166 | 6.008 | 7.179  | 8.505    | 10.000 | 11.677 | -0.001 | 0.160 | 6.625 | 7.771  | 9.115    | 10.692 | 12.542 |
| 8.6    | 0.275   | 0.166 | 6.099 | 7.286  | 8.633    | 10.151 | 11.853 | -0.004 | 0.160 | 6.705 | 7.867  | 9.231    | 10.833 | 12.713 |
| 8.7    | 0.273   | 0.166 | 6.192 | 7.396  | 8.762    | 10.303 | 12.033 | -0.007 | 0.160 | 6.786 | 7.964  | 9.348    | 10.974 | 12.886 |
| 8.8    | 0.271   | 0.166 | 6.286 | 7.508  | 8.894    | 10.459 | 12.215 | -0.010 | 0.161 | 6.868 | 8.062  | 9.466    | 11.117 | 13.060 |
| 8.9    | 0.269   | 0.166 | 6.382 | 7.621  | 9.029    | 10.617 | 12.401 | -0.013 | 0.161 | 6.950 | 8.160  | 9.584    | 11.261 | 13.236 |
| 9.0    | 0.267   | 0.166 | 6.479 | 7.737  | 9.165    | 10.778 | 12.589 | -0.016 | 0.161 | 7.032 | 8.259  | 9.704    | 11.406 | 13.413 |
| 9.1    | 0.265   | 0.166 | 6.579 | 7.855  | 9.304    | 10.941 | 12.781 | -0.019 | 0.162 | 7.115 | 8.359  | 9.825    | 11.553 | 13.593 |
| 9.2    | 0.263   | 0.166 | 6.680 | 7.975  | 9.446    | 11.108 | 12.976 | -0.021 | 0.162 | 7.199 | 8.460  | 9.947    | 11.702 | 13.775 |
| 9.3    | 0.260   | 0.166 | 6.784 | 8.097  | 9.590    | 11.277 | 13.175 | -0.024 | 0.163 | 7.284 | 8.562  | 10.071   | 11.853 | 13.959 |
| 9.4    | 0.258   | 0.166 | 6.889 | 8.222  | 9.737    | 11.450 | 13.377 | -0.027 | 0.163 | 7.371 | 8.666  | 10.196   | 12.005 | 14.146 |
| 9.5    | 0.256   | 0.165 | 6.996 | 8.348  | 9.886    | 11.625 | 13.582 | -0.029 | 0.163 | 7.458 | 8.771  | 10.324   | 12.160 | 14.335 |
| 9.6    | 0.254   | 0.165 | 7.105 | 8.477  | 10.037   | 11.803 | 13.790 | -0.031 | 0.164 | 7.546 | 8.878  | 10.453   | 12.318 | 14.528 |
| 9.7    | 0.252   | 0.165 | 7.215 | 8.607  | 10.191   | 11.983 | 14.001 | -0.034 | 0.164 | 7.636 | 8.986  | 10.584   | 12.478 | 14.723 |
| 9.8    | 0.250   | 0.165 | 7.328 | 8.740  | 10.347   | 12.166 | 14.215 | -0.036 | 0.165 | 7.728 | 9.096  | 10.718   | 12.640 | 14.923 |
| 9.9    | 0.248   | 0.165 | 7.442 | 8.874  | 10.505   | 12.352 | 14.432 | -0.038 | 0.165 | 7.821 | 9.209  | 10.854   | 12.806 | 15.125 |
| 10.0   | 0.246   | 0.165 | 7.557 | 9.011  | 10.666   | 12.540 | 14.652 | -0.039 | 0.165 | 7.916 | 9.323  | 10.993   | 12.976 | 15.332 |
| 10.1   | 0.244   | 0.165 | 7.675 | 9.149  | 10.828   | 12.730 | 14.874 | -0.041 | 0.166 | 8.013 | 9.440  | 11.135   | 13.148 | 15.544 |
| 10.2   | 0.242   | 0.165 | 7.794 | 9.289  | 10.992   | 12.922 | 15.099 | -0.043 | 0.166 | 8.112 | 9.560  | 11.280   | 13.325 | 15.760 |
| 10.3   | 0.240   | 0.165 | 7.914 | 9.431  | 11.158   | 13.117 | 15.326 | -0.044 | 0.166 | 8.214 | 9.683  | 11.429   | 13.506 | 15.980 |
| 10.4   | 0.238   | 0.165 | 8.036 | 9.574  | 11.326   | 13.313 | 15.555 | -0.045 | 0.167 | 8.318 | 9.809  | 11.581   | 13.691 | 16.206 |
| 10.5   | 0.236   | 0.165 | 8.159 | 9.718  | 11.495   | 13.510 | 15.785 | -0.046 | 0.167 | 8.424 | 9.937  | 11.737   | 13.881 | 16.437 |
| 10.6   | 0.234   | 0.165 | 8.283 | 9.864  | 11.666   | 13.709 | 16.017 | -0.047 | 0.167 | 8.534 | 10.070 | 11.897   | 14.075 | 16.674 |
| 10.7   | 0.232   | 0.164 | 8.408 | 10.010 | 11.837   | 13.909 | 16.250 | -0.048 | 0.168 | 8.647 | 10.206 | 12.062   | 14.274 | 16.916 |
| 10.8   | 0.230   | 0.164 | 8.534 | 10.157 | 12.009   | 14.110 | 16.483 | -0.048 | 0.168 | 8.762 | 10.345 | 12.230   | 14.479 | 17.165 |
| 10.9   | 0.228   | 0.164 | 8.661 | 10.305 | 12.181   | 14.311 | 16.718 | -0.049 | 0.168 | 8.881 | 10.489 | 12.404   | 14.689 | 17.420 |
| 11.0   | 0.225   | 0.164 | 8.788 | 10.454 | 12.354   | 14.513 | 16.952 | -0.049 | 0.169 | 9.004 | 10.636 | 12.582   | 14.905 | 17.681 |
| 11.1   | 0.223   | 0.164 | 8.915 | 10.602 | 12.527   | 14.714 | 17.186 | -0.049 | 0.169 | 9.130 | 10.788 | 12.765   | 15.126 | 17.948 |
| 11.2   | 0.221   | 0.164 | 9.042 | 10.751 | 12.700   | 14.915 | 17.419 | -0.048 | 0.169 | 9.259 | 10.944 | 12.954   | 15.353 | 18.222 |
| 11.3   | 0.219   | 0.163 | 9.170 | 10.899 | 12.873   | 15.116 | 17.652 | -0.048 | 0.169 | 9.393 | 11.105 | 13.147   | 15.586 | 18.504 |
| 11.4   | 0.217   | 0.163 | 9.297 | 11.047 | 13.045   | 15.315 | 17.884 | -0.047 | 0.170 | 9.531 | 11.271 | 13.346   | 15.826 | 18.792 |
| 11.5   | 0.215   | 0.163 | 9.424 | 11.194 | 13.216   | 15.514 | 18.114 | -0.046 | 0.170 | 9.672 | 11.441 | 13.551   | 16.072 | 19.087 |





**Table S8. Appendicular Lean Soft Tissue Mass, kg**

| Age, y | Females |       |        |        |          |        |        | Males |       |        |        |          |        |        |
|--------|---------|-------|--------|--------|----------|--------|--------|-------|-------|--------|--------|----------|--------|--------|
|        | L       | S     | -2 SD  | -1 SD  | 0 SD (M) | 1 SD   | 2 SD   | L     | S     | -2 SD  | -1 SD  | 0 SD (M) | 1 SD   | 2 SD   |
| 18.1   | 0.079   | 0.154 | 13.236 | 15.480 | 18.069   | 21.051 | 24.481 | 0.324 | 0.146 | 19.629 | 22.964 | 26.663   | 30.744 | 35.229 |
| 18.2   | 0.077   | 0.154 | 13.241 | 15.484 | 18.073   | 21.057 | 24.490 | 0.332 | 0.145 | 19.676 | 23.017 | 26.718   | 30.796 | 35.271 |
| 18.3   | 0.075   | 0.154 | 13.244 | 15.487 | 18.077   | 21.063 | 24.499 | 0.339 | 0.145 | 19.721 | 23.068 | 26.770   | 30.845 | 35.310 |
| 18.4   | 0.073   | 0.154 | 13.248 | 15.490 | 18.081   | 21.068 | 24.507 | 0.347 | 0.145 | 19.763 | 23.116 | 26.819   | 30.890 | 35.345 |
| 18.5   | 0.071   | 0.154 | 13.250 | 15.493 | 18.084   | 21.072 | 24.514 | 0.354 | 0.145 | 19.804 | 23.161 | 26.866   | 30.933 | 35.377 |
| 18.6   | 0.069   | 0.154 | 13.253 | 15.495 | 18.086   | 21.076 | 24.521 | 0.362 | 0.144 | 19.842 | 23.205 | 26.910   | 30.972 | 35.406 |
| 18.7   | 0.067   | 0.154 | 13.255 | 15.496 | 18.088   | 21.079 | 24.527 | 0.370 | 0.144 | 19.879 | 23.246 | 26.952   | 31.009 | 35.432 |
| 18.8   | 0.065   | 0.154 | 13.256 | 15.498 | 18.089   | 21.082 | 24.533 | 0.377 | 0.144 | 19.914 | 23.286 | 26.991   | 31.044 | 35.456 |
| 18.9   | 0.063   | 0.154 | 13.258 | 15.498 | 18.090   | 21.084 | 24.538 | 0.385 | 0.143 | 19.948 | 23.324 | 27.029   | 31.077 | 35.477 |
| 19.0   | 0.061   | 0.154 | 13.259 | 15.499 | 18.091   | 21.086 | 24.543 | 0.393 | 0.143 | 19.980 | 23.360 | 27.066   | 31.108 | 35.497 |
| 19.1   | 0.059   | 0.154 | 13.259 | 15.499 | 18.091   | 21.088 | 24.547 | 0.400 | 0.143 | 20.012 | 23.395 | 27.100   | 31.137 | 35.514 |
| 19.2   | 0.057   | 0.154 | 13.259 | 15.499 | 18.091   | 21.089 | 24.551 | 0.408 | 0.142 | 20.042 | 23.429 | 27.134   | 31.165 | 35.531 |
| 19.3   | 0.055   | 0.154 | 13.260 | 15.498 | 18.091   | 21.090 | 24.554 | 0.415 | 0.142 | 20.072 | 23.462 | 27.166   | 31.192 | 35.546 |
| 19.4   | 0.053   | 0.154 | 13.259 | 15.497 | 18.090   | 21.090 | 24.558 | 0.423 | 0.142 | 20.101 | 23.495 | 27.198   | 31.217 | 35.560 |
| 19.5   | 0.051   | 0.154 | 13.259 | 15.496 | 18.089   | 21.090 | 24.561 | 0.430 | 0.142 | 20.129 | 23.526 | 27.228   | 31.242 | 35.573 |
| 19.6   | 0.049   | 0.154 | 13.258 | 15.495 | 18.088   | 21.090 | 24.563 | 0.438 | 0.141 | 20.156 | 23.557 | 27.258   | 31.266 | 35.585 |
| 19.7   | 0.047   | 0.154 | 13.257 | 15.494 | 18.087   | 21.090 | 24.566 | 0.445 | 0.141 | 20.184 | 23.588 | 27.288   | 31.290 | 35.597 |
| 19.8   | 0.044   | 0.154 | 13.256 | 15.492 | 18.085   | 21.090 | 24.568 | 0.453 | 0.141 | 20.211 | 23.618 | 27.317   | 31.313 | 35.609 |
| 19.9   | 0.042   | 0.154 | 13.255 | 15.490 | 18.083   | 21.089 | 24.570 | 0.460 | 0.141 | 20.238 | 23.648 | 27.346   | 31.336 | 35.621 |
| 20.0   | 0.040   | 0.154 | 13.254 | 15.488 | 18.081   | 21.088 | 24.572 | 0.468 | 0.140 | 20.265 | 23.678 | 27.375   | 31.359 | 35.633 |





**Table S9. Leg Lean Soft Tissue Mass, kg**

| Age, y | Females |       |        |        |          |        |        | Males |       |        |        |          |        |        |
|--------|---------|-------|--------|--------|----------|--------|--------|-------|-------|--------|--------|----------|--------|--------|
|        | L       | S     | -2 SD  | -1 SD  | 0 SD (M) | 1 SD   | 2 SD   | L     | S     | -2 SD  | -1 SD  | 0 SD (M) | 1 SD   | 2 SD   |
| 17.4   | 0.121   | 0.156 | 10.092 | 11.845 | 13.860   | 16.170 | 18.812 | 0.254 | 0.152 | 13.940 | 16.384 | 19.134   | 22.215 | 25.652 |
| 17.5   | 0.119   | 0.156 | 10.099 | 11.851 | 13.866   | 16.178 | 18.821 | 0.257 | 0.152 | 13.990 | 16.438 | 19.190   | 22.272 | 25.706 |
| 17.6   | 0.117   | 0.156 | 10.105 | 11.857 | 13.873   | 16.185 | 18.830 | 0.260 | 0.151 | 14.038 | 16.489 | 19.243   | 22.325 | 25.757 |
| 17.7   | 0.115   | 0.156 | 10.110 | 11.863 | 13.878   | 16.191 | 18.839 | 0.263 | 0.151 | 14.083 | 16.537 | 19.293   | 22.374 | 25.803 |
| 17.8   | 0.113   | 0.155 | 10.115 | 11.867 | 13.883   | 16.197 | 18.846 | 0.266 | 0.151 | 14.126 | 16.583 | 19.341   | 22.420 | 25.846 |
| 17.9   | 0.111   | 0.155 | 10.120 | 11.871 | 13.887   | 16.202 | 18.853 | 0.269 | 0.150 | 14.168 | 16.627 | 19.385   | 22.463 | 25.885 |
| 18.0   | 0.109   | 0.155 | 10.124 | 11.875 | 13.891   | 16.206 | 18.860 | 0.272 | 0.150 | 14.207 | 16.669 | 19.427   | 22.503 | 25.920 |
| 18.1   | 0.107   | 0.155 | 10.128 | 11.878 | 13.894   | 16.210 | 18.865 | 0.275 | 0.150 | 14.245 | 16.708 | 19.466   | 22.540 | 25.952 |
| 18.2   | 0.105   | 0.155 | 10.131 | 11.881 | 13.897   | 16.214 | 18.870 | 0.278 | 0.149 | 14.281 | 16.745 | 19.503   | 22.575 | 25.981 |
| 18.3   | 0.103   | 0.155 | 10.133 | 11.883 | 13.899   | 16.217 | 18.875 | 0.281 | 0.149 | 14.315 | 16.781 | 19.538   | 22.606 | 26.007 |
| 18.4   | 0.101   | 0.155 | 10.136 | 11.885 | 13.901   | 16.219 | 18.879 | 0.284 | 0.149 | 14.348 | 16.814 | 19.570   | 22.635 | 26.030 |
| 18.5   | 0.099   | 0.155 | 10.138 | 11.886 | 13.902   | 16.221 | 18.883 | 0.287 | 0.148 | 14.380 | 16.846 | 19.601   | 22.662 | 26.050 |
| 18.6   | 0.097   | 0.155 | 10.139 | 11.887 | 13.903   | 16.222 | 18.886 | 0.290 | 0.148 | 14.410 | 16.877 | 19.630   | 22.687 | 26.068 |
| 18.7   | 0.095   | 0.155 | 10.141 | 11.888 | 13.903   | 16.223 | 18.889 | 0.293 | 0.147 | 14.439 | 16.906 | 19.657   | 22.710 | 26.084 |
| 18.8   | 0.093   | 0.155 | 10.141 | 11.888 | 13.903   | 16.224 | 18.891 | 0.296 | 0.147 | 14.466 | 16.933 | 19.682   | 22.731 | 26.098 |
| 18.9   | 0.091   | 0.155 | 10.142 | 11.888 | 13.903   | 16.224 | 18.893 | 0.299 | 0.147 | 14.493 | 16.960 | 19.706   | 22.751 | 26.110 |
| 19.0   | 0.089   | 0.155 | 10.143 | 11.888 | 13.903   | 16.224 | 18.894 | 0.302 | 0.146 | 14.519 | 16.985 | 19.729   | 22.768 | 26.120 |
| 19.1   | 0.086   | 0.156 | 10.143 | 11.887 | 13.902   | 16.224 | 18.896 | 0.306 | 0.146 | 14.544 | 17.009 | 19.751   | 22.785 | 26.128 |
| 19.2   | 0.084   | 0.156 | 10.143 | 11.886 | 13.901   | 16.223 | 18.897 | 0.309 | 0.146 | 14.568 | 17.033 | 19.771   | 22.800 | 26.136 |
| 19.3   | 0.082   | 0.156 | 10.142 | 11.885 | 13.899   | 16.223 | 18.897 | 0.312 | 0.145 | 14.592 | 17.055 | 19.791   | 22.814 | 26.141 |
| 19.4   | 0.080   | 0.156 | 10.142 | 11.884 | 13.898   | 16.222 | 18.898 | 0.315 | 0.145 | 14.614 | 17.077 | 19.809   | 22.827 | 26.146 |
| 19.5   | 0.078   | 0.156 | 10.141 | 11.883 | 13.896   | 16.220 | 18.898 | 0.318 | 0.145 | 14.637 | 17.098 | 19.827   | 22.839 | 26.150 |
| 19.6   | 0.076   | 0.156 | 10.140 | 11.881 | 13.894   | 16.219 | 18.898 | 0.321 | 0.144 | 14.658 | 17.118 | 19.844   | 22.851 | 26.153 |
| 19.7   | 0.074   | 0.156 | 10.139 | 11.879 | 13.892   | 16.217 | 18.898 | 0.324 | 0.144 | 14.680 | 17.138 | 19.861   | 22.861 | 26.155 |
| 19.8   | 0.072   | 0.156 | 10.138 | 11.877 | 13.890   | 16.215 | 18.898 | 0.327 | 0.144 | 14.701 | 17.158 | 19.877   | 22.872 | 26.156 |
| 19.9   | 0.070   | 0.156 | 10.137 | 11.875 | 13.888   | 16.213 | 18.897 | 0.330 | 0.143 | 14.722 | 17.177 | 19.892   | 22.881 | 26.157 |
| 20.0   | 0.068   | 0.156 | 10.136 | 11.873 | 13.885   | 16.211 | 18.897 | 0.333 | 0.143 | 14.742 | 17.196 | 19.908   | 22.891 | 26.158 |





**Table S10. Fat Mass, kg**

| Age, y | Females |       |       |        |          |        |        | Males  |       |       |       |          |        |        |
|--------|---------|-------|-------|--------|----------|--------|--------|--------|-------|-------|-------|----------|--------|--------|
|        | L       | S     | -2 SD | -1 SD  | 0 SD (M) | 1 SD   | 2 SD   | L      | S     | -2 SD | -1 SD | 0 SD (M) | 1 SD   | 2 SD   |
| 17.4   | -0.274  | 0.340 | 9.272 | 12.494 | 17.287   | 24.689 | 36.648 | -0.477 | 0.420 | 5.166 | 7.139 | 10.465   | 16.712 | 30.560 |
| 17.5   | -0.275  | 0.340 | 9.308 | 12.539 | 17.348   | 24.777 | 36.787 | -0.475 | 0.420 | 5.187 | 7.169 | 10.510   | 16.781 | 30.658 |
| 17.6   | -0.276  | 0.340 | 9.342 | 12.584 | 17.408   | 24.864 | 36.923 | -0.474 | 0.419 | 5.209 | 7.200 | 10.557   | 16.851 | 30.755 |
| 17.7   | -0.277  | 0.339 | 9.376 | 12.627 | 17.466   | 24.948 | 37.057 | -0.472 | 0.419 | 5.230 | 7.232 | 10.603   | 16.921 | 30.851 |
| 17.8   | -0.278  | 0.339 | 9.409 | 12.668 | 17.523   | 25.030 | 37.188 | -0.470 | 0.419 | 5.252 | 7.263 | 10.650   | 16.992 | 30.948 |
| 17.9   | -0.279  | 0.339 | 9.440 | 12.709 | 17.577   | 25.110 | 37.317 | -0.469 | 0.419 | 5.273 | 7.295 | 10.698   | 17.063 | 31.043 |
| 18.0   | -0.281  | 0.339 | 9.471 | 12.748 | 17.631   | 25.188 | 37.444 | -0.467 | 0.419 | 5.295 | 7.327 | 10.745   | 17.134 | 31.139 |
| 18.1   | -0.282  | 0.339 | 9.501 | 12.787 | 17.683   | 25.265 | 37.568 | -0.465 | 0.419 | 5.316 | 7.358 | 10.793   | 17.206 | 31.233 |
| 18.2   | -0.283  | 0.339 | 9.529 | 12.824 | 17.733   | 25.339 | 37.689 | -0.463 | 0.419 | 5.338 | 7.390 | 10.842   | 17.278 | 31.327 |
| 18.3   | -0.284  | 0.339 | 9.557 | 12.859 | 17.782   | 25.411 | 37.808 | -0.461 | 0.419 | 5.359 | 7.423 | 10.890   | 17.351 | 31.420 |
| 18.4   | -0.285  | 0.340 | 9.584 | 12.894 | 17.829   | 25.481 | 37.924 | -0.458 | 0.419 | 5.381 | 7.455 | 10.939   | 17.424 | 31.513 |
| 18.5   | -0.286  | 0.340 | 9.610 | 12.927 | 17.875   | 25.549 | 38.038 | -0.456 | 0.419 | 5.402 | 7.487 | 10.988   | 17.496 | 31.605 |
| 18.6   | -0.288  | 0.340 | 9.635 | 12.959 | 17.919   | 25.615 | 38.149 | -0.454 | 0.419 | 5.424 | 7.519 | 11.037   | 17.569 | 31.696 |
| 18.7   | -0.289  | 0.340 | 9.659 | 12.990 | 17.961   | 25.679 | 38.256 | -0.451 | 0.419 | 5.445 | 7.552 | 11.086   | 17.642 | 31.786 |
| 18.8   | -0.290  | 0.340 | 9.683 | 13.020 | 18.001   | 25.740 | 38.361 | -0.449 | 0.419 | 5.466 | 7.584 | 11.135   | 17.716 | 31.876 |
| 18.9   | -0.291  | 0.340 | 9.705 | 13.048 | 18.040   | 25.799 | 38.463 | -0.447 | 0.419 | 5.487 | 7.616 | 11.184   | 17.789 | 31.964 |
| 19.0   | -0.292  | 0.340 | 9.726 | 13.075 | 18.077   | 25.856 | 38.561 | -0.444 | 0.419 | 5.508 | 7.648 | 11.233   | 17.862 | 32.052 |
| 19.1   | -0.293  | 0.340 | 9.746 | 13.101 | 18.113   | 25.910 | 38.656 | -0.441 | 0.419 | 5.529 | 7.680 | 11.283   | 17.935 | 32.139 |
| 19.2   | -0.295  | 0.340 | 9.765 | 13.125 | 18.146   | 25.962 | 38.748 | -0.439 | 0.419 | 5.550 | 7.713 | 11.332   | 18.008 | 32.225 |
| 19.3   | -0.296  | 0.340 | 9.783 | 13.148 | 18.178   | 26.012 | 38.837 | -0.436 | 0.419 | 5.570 | 7.745 | 11.381   | 18.081 | 32.311 |
| 19.4   | -0.297  | 0.340 | 9.800 | 13.170 | 18.209   | 26.059 | 38.923 | -0.433 | 0.419 | 5.591 | 7.777 | 11.431   | 18.154 | 32.396 |
| 19.5   | -0.298  | 0.340 | 9.817 | 13.191 | 18.238   | 26.105 | 39.005 | -0.430 | 0.419 | 5.611 | 7.809 | 11.480   | 18.227 | 32.480 |
| 19.6   | -0.299  | 0.340 | 9.832 | 13.210 | 18.265   | 26.148 | 39.085 | -0.428 | 0.419 | 5.632 | 7.841 | 11.530   | 18.300 | 32.563 |
| 19.7   | -0.300  | 0.340 | 9.847 | 13.229 | 18.290   | 26.189 | 39.162 | -0.425 | 0.419 | 5.652 | 7.873 | 11.579   | 18.373 | 32.646 |
| 19.8   | -0.301  | 0.340 | 9.860 | 13.246 | 18.314   | 26.227 | 39.235 | -0.422 | 0.419 | 5.672 | 7.904 | 11.629   | 18.446 | 32.729 |
| 19.9   | -0.303  | 0.340 | 9.873 | 13.262 | 18.337   | 26.264 | 39.306 | -0.419 | 0.419 | 5.692 | 7.936 | 11.678   | 18.519 | 32.811 |
| 20.0   | -0.304  | 0.341 | 9.886 | 13.277 | 18.358   | 26.299 | 39.374 | -0.416 | 0.419 | 5.712 | 7.968 | 11.728   | 18.592 | 32.893 |



**Table S11. Total Lean Soft Tissue mass, kg**

| Age, y    | Females |       |        |        |          |        |        |                        | Males  |       |        |        |          |        |        |                        |
|-----------|---------|-------|--------|--------|----------|--------|--------|------------------------|--------|-------|--------|--------|----------|--------|--------|------------------------|
|           | L       | S     | -2 SD  | -1 SD  | 0 SD (M) | 1 SD   | 2 SD   | HAZ Adjustment         | L      | S     | -2 SD  | -1 SD  | 0 SD (M) | 1 SD   | 2 SD   | HAZ Adjustment         |
| 5.0-5.9   | 0.078   | 0.125 | 10.966 | 12.455 | 14.129   | 16.008 | 18.116 | -0.224 + (HAZ • 0.885) | -0.154 | 0.116 | 12.157 | 13.605 | 15.257   | 17.143 | 19.304 | -0.180 + (HAZ • 0.935) |
| 6.0-6.9   | 0.079   | 0.128 | 12.415 | 14.143 | 16.090   | 18.281 | 20.744 | -0.079 + (HAZ • 0.858) | -0.126 | 0.120 | 13.695 | 15.402 | 17.352   | 19.586 | 22.147 | -0.161 + (HAZ • 0.859) |
| 7.0-7.0   | 0.081   | 0.131 | 13.903 | 15.885 | 18.124   | 20.650 | 23.495 | -0.014 + (HAZ • 0.843) | -0.097 | 0.125 | 15.245 | 17.233 | 19.510   | 22.121 | 25.121 | -0.076 + (HAZ • 0.894) |
| 8.0-8.9   | 0.083   | 0.134 | 15.572 | 17.841 | 20.409   | 23.313 | 26.591 | -0.089 + (HAZ • 0.855) | -0.069 | 0.130 | 16.822 | 19.115 | 21.746   | 24.768 | 28.243 | -0.034 + (HAZ • 0.863) |
| 9.0-9.9   | 0.084   | 0.136 | 17.602 | 20.211 | 23.170   | 26.520 | 30.309 | -0.255 + (HAZ • 0.871) | -0.041 | 0.134 | 18.512 | 21.144 | 24.167   | 27.643 | 31.643 | -0.027 + (HAZ • 0.839) |
| 10.0-10.9 | 0.086   | 0.137 | 20.076 | 23.082 | 26.494   | 30.362 | 34.739 | -0.383 + (HAZ • 0.927) | -0.013 | 0.138 | 20.517 | 23.545 | 27.026   | 31.029 | 35.633 | -0.138 + (HAZ • 0.870) |
| 11.0-11.9 | 0.088   | 0.137 | 22.859 | 26.285 | 30.174   | 34.580 | 39.567 | -0.346 + (HAZ • 0.993) | 0.015  | 0.141 | 23.099 | 26.611 | 30.647   | 35.285 | 40.613 | -0.338 + (HAZ • 0.943) |
| 12.0-12.0 | 0.090   | 0.136 | 25.612 | 29.419 | 33.735   | 38.620 | 44.141 | -0.128 + (HAZ • 0.894) | 0.044  | 0.143 | 26.394 | 30.486 | 35.182   | 40.564 | 46.729 | -0.406 + (HAZ • 1.000) |
| 13.0-13.9 | 0.091   | 0.134 | 27.972 | 32.070 | 36.706   | 41.943 | 47.851 | 0.028 + (HAZ • 0.690)  | 0.072  | 0.143 | 30.235 | 34.957 | 40.357   | 46.522 | 53.552 | -0.282 + (HAZ • 0.970) |
| 14.0-14.0 | 0.093   | 0.132 | 29.748 | 34.031 | 38.868   | 44.319 | 50.455 | -0.014 + (HAZ • 0.645) | 0.100  | 0.141 | 34.197 | 39.514 | 45.563   | 52.433 | 60.221 | -0.069 + (HAZ • 0.833) |
| 15.0-15.9 | 0.095   | 0.130 | 30.943 | 35.327 | 40.267   | 45.824 | 52.067 | -0.047 + (HAZ • 0.599) | 0.128  | 0.139 | 37.801 | 43.597 | 50.153   | 57.553 | 65.887 | 0.055 + (HAZ • 0.638)  |
| 16.0-16.0 | 0.097   | 0.128 | 31.677 | 36.107 | 41.088   | 46.683 | 52.957 | -0.094 + (HAZ • 0.629) | 0.156  | 0.136 | 40.739 | 46.867 | 53.756   | 61.479 | 70.118 | 0.028 + (HAZ • 0.558)  |
| 17.0-17.9 | 0.098   | 0.127 | 32.108 | 36.552 | 41.545   | 47.144 | 53.414 | -0.096 + (HAZ • 0.652) | 0.185  | 0.132 | 42.949 | 49.272 | 56.334   | 64.200 | 72.940 | -0.024 + (HAZ • 0.525) |
| 18.0-18.9 | 0.100   | 0.126 | 32.358 | 36.804 | 41.792   | 47.381 | 53.634 | -0.042 + (HAZ • 0.621) | 0.213  | 0.129 | 44.538 | 50.949 | 58.066   | 65.942 | 74.637 | -0.022 + (HAZ • 0.502) |
| 19.0-19.9 | 0.102   | 0.126 | 32.502 | 36.942 | 41.919   | 47.491 | 53.720 | -0.044 + (HAZ • 0.590) | 0.241  | 0.126 | 45.697 | 52.127 | 59.221   | 67.026 | 75.587 | -0.088 + (HAZ • 0.610) |

**Table S12. Subtotal Lean Soft Tissue Mass, kg**

| Age, y    | Females |       |        |        |          |        |        |                        | Males  |       |        |        |          |        |        |                        |
|-----------|---------|-------|--------|--------|----------|--------|--------|------------------------|--------|-------|--------|--------|----------|--------|--------|------------------------|
|           | L       | S     | -2 SD  | -1 SD  | 0 SD (M) | 1 SD   | 2 SD   | HAZ Adjustment         | L      | S     | -2 SD  | -1 SD  | 0 SD (M) | 1 SD   | 2 SD   | HAZ Adjustment         |
| 5.0-5.9   | 0.152   | 0.141 | 8.881  | 10.273 | 11.846   | 13.618 | 15.610 | -0.229 + (HAZ • 0.895) | -0.060 | 0.129 | 9.933  | 11.289 | 12.843   | 14.626 | 16.673 | -0.179 + (HAZ • 0.936) |
| 6.0-6.9   | 0.154   | 0.143 | 10.257 | 11.889 | 13.736   | 15.821 | 18.166 | -0.074 + (HAZ • 0.853) | -0.036 | 0.133 | 11.392 | 13.004 | 14.855   | 16.979 | 19.421 | -0.161 + (HAZ • 0.851) |
| 7.0-7.0   | 0.156   | 0.145 | 11.675 | 13.561 | 15.697   | 18.111 | 20.831 | -0.013 + (HAZ • 0.837) | -0.012 | 0.137 | 12.871 | 14.761 | 16.932   | 19.427 | 22.295 | -0.071 + (HAZ • 0.886) |
| 8.0-8.9   | 0.157   | 0.146 | 13.271 | 15.442 | 17.904   | 20.689 | 23.831 | -0.087 + (HAZ • 0.853) | 0.012  | 0.141 | 14.384 | 16.573 | 19.090   | 21.984 | 25.311 | -0.034 + (HAZ • 0.854) |
| 9.0-9.9   | 0.159   | 0.147 | 15.218 | 17.729 | 20.579   | 23.805 | 27.446 | -0.258 + (HAZ • 0.869) | 0.035  | 0.145 | 16.013 | 18.533 | 21.432   | 24.767 | 28.600 | -0.025 + (HAZ • 0.829) |
| 10.0-10.9 | 0.161   | 0.148 | 17.596 | 20.506 | 23.808   | 27.546 | 31.764 | -0.387 + (HAZ • 0.922) | 0.059  | 0.148 | 17.954 | 20.864 | 24.213   | 28.062 | 32.483 | -0.140 + (HAZ • 0.866) |
| 11.0-11.9 | 0.163   | 0.147 | 20.277 | 23.609 | 27.387   | 31.659 | 36.476 | -0.344 + (HAZ • 0.985) | 0.083  | 0.151 | 20.456 | 23.848 | 27.748   | 32.226 | 37.357 | -0.340 + (HAZ • 0.941) |
| 12.0-12.0 | 0.165   | 0.145 | 22.933 | 26.648 | 30.852   | 35.597 | 40.937 | -0.126 + (HAZ • 0.885) | 0.107  | 0.152 | 23.646 | 27.619 | 32.178   | 37.397 | 43.359 | -0.407 + (HAZ • 0.998) |
| 13.0-13.9 | 0.166   | 0.142 | 25.217 | 29.222 | 33.744   | 38.835 | 44.551 | 0.030 + (HAZ • 0.688)  | 0.131  | 0.151 | 27.361 | 31.965 | 37.228   | 43.228 | 50.052 | -0.282 + (HAZ • 0.968) |
| 14.0-14.0 | 0.168   | 0.139 | 26.941 | 31.132 | 35.851   | 41.151 | 47.086 | -0.013 + (HAZ • 0.644) | 0.155  | 0.149 | 31.191 | 36.389 | 42.301   | 49.005 | 56.586 | -0.067 + (HAZ • 0.832) |
| 15.0-15.9 | 0.170   | 0.137 | 28.108 | 32.398 | 37.218   | 42.618 | 48.654 | -0.043 + (HAZ • 0.599) | 0.179  | 0.146 | 34.678 | 40.353 | 46.770   | 54.002 | 62.127 | 0.058 + (HAZ • 0.638)  |
| 16.0-16.0 | 0.172   | 0.135 | 28.829 | 33.162 | 38.022   | 43.457 | 49.520 | -0.095 + (HAZ • 0.633) | 0.203  | 0.142 | 37.525 | 43.528 | 50.273   | 57.827 | 66.259 | 0.031 + (HAZ • 0.561)  |
| 17.0-17.9 | 0.173   | 0.134 | 29.255 | 33.602 | 38.470   | 43.907 | 49.964 | -0.095 + (HAZ • 0.655) | 0.226  | 0.138 | 39.669 | 45.862 | 52.777   | 60.473 | 69.009 | -0.021 + (HAZ • 0.530) |
| 18.0-18.9 | 0.175   | 0.133 | 29.505 | 33.852 | 38.715   | 44.141 | 50.178 | -0.043 + (HAZ • 0.627) | 0.250  | 0.135 | 41.213 | 47.489 | 54.455   | 62.161 | 70.656 | -0.024 + (HAZ • 0.510) |
| 19.0-19.9 | 0.177   | 0.132 | 29.653 | 33.994 | 38.846   | 44.253 | 50.265 | -0.048 + (HAZ • 0.591) | 0.274  | 0.131 | 42.342 | 48.631 | 55.572   | 63.206 | 71.573 | -0.090 + (HAZ • 0.614) |

**Table S13. Appendicular Lean Soft Tissue Mass, kg**

| Age, y    | Females |       |        |        |          |        |        |                        | Males  |       |        |        |          |        |        |                        |
|-----------|---------|-------|--------|--------|----------|--------|--------|------------------------|--------|-------|--------|--------|----------|--------|--------|------------------------|
|           | L       | S     | -2 SD  | -1 SD  | 0 SD (M) | 1 SD   | 2 SD   | HAZ Adjustment         | L      | S     | -2 SD  | -1 SD  | 0 SD (M) | 1 SD   | 2 SD   | HAZ Adjustment         |
| 5.0-5.9   | 0.339   | 0.165 | 3.727  | 4.461  | 5.284    | 6.202  | 7.219  | -0.233 + (HAZ • 0.91)  | 0.104  | 0.149 | 4.303  | 5.014  | 5.829    | 6.760  | 7.823  | -0.160 + (HAZ • 0.925) |
| 6.0-6.9   | 0.318   | 0.165 | 4.437  | 5.307  | 6.288    | 7.385  | 8.606  | -0.079 + (HAZ • 0.804) | 0.068  | 0.153 | 5.048  | 5.894  | 6.871    | 7.997  | 9.294  | -0.169 + (HAZ • 0.817) |
| 7.0-7.0   | 0.297   | 0.165 | 5.178  | 6.190  | 7.335    | 8.620  | 10.056 | -0.020 + (HAZ • 0.803) | 0.032  | 0.156 | 5.830  | 6.822  | 7.977    | 9.319  | 10.879 | -0.059 + (HAZ • 0.835) |
| 8.0-8.9   | 0.277   | 0.166 | 6.008  | 7.179  | 8.505    | 10.000 | 11.677 | -0.077 + (HAZ • 0.814) | -0.001 | 0.160 | 6.625  | 7.771  | 9.115    | 10.692 | 12.542 | -0.078 + (HAZ • 0.797) |
| 9.0-9.9   | 0.256   | 0.165 | 6.996  | 8.348  | 9.886    | 11.625 | 13.582 | -0.242 + (HAZ • 0.829) | -0.029 | 0.163 | 7.458  | 8.771  | 10.324   | 12.160 | 14.335 | -0.031 + (HAZ • 0.774) |
| 10.0-10.9 | 0.236   | 0.165 | 8.159  | 9.718  | 11.495   | 13.510 | 15.785 | -0.349 + (HAZ • 0.849) | -0.046 | 0.167 | 8.424  | 9.937  | 11.737   | 13.881 | 16.437 | -0.093 + (HAZ • 0.809) |
| 11.0-11.9 | 0.215   | 0.163 | 9.424  | 11.194 | 13.216   | 15.514 | 18.114 | -0.296 + (HAZ • 0.905) | -0.046 | 0.170 | 9.672  | 11.441 | 13.551   | 16.072 | 19.087 | -0.271 + (HAZ • 0.893) |
| 12.0-12.0 | 0.195   | 0.161 | 10.631 | 12.587 | 14.823   | 17.369 | 20.255 | -0.109 + (HAZ • 0.807) | -0.025 | 0.171 | 11.310 | 13.399 | 15.885   | 18.845 | 22.374 | -0.340 + (HAZ • 0.944) |
| 13.0-13.9 | 0.174   | 0.159 | 11.630 | 13.722 | 16.117   | 18.846 | 21.947 | 0.012 + (HAZ • 0.626)  | 0.017  | 0.168 | 13.265 | 15.705 | 18.585   | 21.983 | 25.990 | -0.249 + (HAZ • 0.885) |
| 14.0-14.0 | 0.153   | 0.156 | 12.352 | 14.529 | 17.023   | 19.870 | 23.110 | -0.013 + (HAZ • 0.577) | 0.073  | 0.163 | 15.291 | 18.054 | 21.275   | 25.022 | 29.374 | -0.108 + (HAZ • 0.782) |
| 15.0-15.9 | 0.133   | 0.155 | 12.812 | 15.033 | 17.580   | 20.494 | 23.817 | -0.051 + (HAZ • 0.519) | 0.136  | 0.157 | 17.075 | 20.089 | 23.551   | 27.517 | 32.047 | 0.008 + (HAZ • 0.594)  |
| 16.0-16.0 | 0.112   | 0.154 | 13.070 | 15.309 | 17.882   | 20.831 | 24.205 | -0.092 + (HAZ • 0.529) | 0.205  | 0.152 | 18.412 | 21.595 | 25.201   | 29.270 | 33.845 | -0.022 + (HAZ • 0.545) |
| 17.0-17.9 | 0.092   | 0.154 | 13.198 | 15.442 | 18.027   | 20.999 | 24.409 | -0.080 + (HAZ • 0.563) | 0.279  | 0.148 | 19.284 | 22.576 | 26.255   | 30.347 | 34.882 | -0.057 + (HAZ • 0.522) |
| 18.0-18.9 | 0.071   | 0.154 | 13.250 | 15.493 | 18.084   | 21.072 | 24.514 | -0.036 + (HAZ • 0.515) | 0.354  | 0.145 | 19.804 | 23.161 | 26.866   | 30.933 | 35.377 | -0.037 + (HAZ • 0.514) |
| 19.0-19.9 | 0.051   | 0.154 | 13.259 | 15.496 | 18.089   | 21.090 | 24.561 | -0.033 + (HAZ • 0.553) | 0.430  | 0.142 | 20.129 | 23.526 | 27.228   | 31.242 | 35.573 | -0.096 + (HAZ • 0.625) |

**Table S14. Leg Lean Soft Tissue Mass, kg**

| Age, y           | Females |       |        |        |          |        |        |                        | Males  |       |        |        |          |        |        |                        |
|------------------|---------|-------|--------|--------|----------|--------|--------|------------------------|--------|-------|--------|--------|----------|--------|--------|------------------------|
|                  | L       | S     | -2 SD  | -1 SD  | 0 SD (M) | 1 SD   | 2 SD   | HAZ Adjustment         | L      | S     | -2 SD  | -1 SD  | 0 SD (M) | 1 SD   | 2 SD   | HAZ Adjustment         |
| <b>5.0-5.9</b>   | 0.365   | 0.171 | 2.706  | 3.269  | 3.901    | 4.605  | 5.385  | -0.238 + (HAZ • 0.918) | -0.109 | 0.163 | 3.074  | 3.605  | 4.238    | 4.998  | 5.911  | -0.142 + (HAZ • 0.865) |
| <b>6.0-6.9</b>   | 0.345   | 0.171 | 3.262  | 3.937  | 4.697    | 5.548  | 6.494  | -0.076 + (HAZ • 0.795) | -0.079 | 0.165 | 3.652  | 4.293  | 5.056    | 5.968  | 7.061  | -0.156 + (HAZ • 0.773) |
| <b>7.0-7.0</b>   | 0.324   | 0.171 | 3.842  | 4.632  | 5.526    | 6.529  | 7.648  | -0.022 + (HAZ • 0.810) | -0.048 | 0.166 | 4.247  | 5.006  | 5.907    | 6.980  | 8.258  | -0.045 + (HAZ • 0.799) |
| <b>8.0-8.9</b>   | 0.304   | 0.171 | 4.490  | 5.407  | 6.447    | 7.618  | 8.931  | -0.070 + (HAZ • 0.819) | -0.018 | 0.168 | 4.867  | 5.750  | 6.798    | 8.040  | 9.513  | -0.054 + (HAZ • 0.769) |
| <b>9.0-9.9</b>   | 0.283   | 0.171 | 5.255  | 6.318  | 7.526    | 8.892  | 10.426 | -0.245 + (HAZ • 0.841) | 0.013  | 0.169 | 5.547  | 6.569  | 7.778    | 9.205  | 10.890 | -0.045 + (HAZ • 0.769) |
| <b>10.0-10.9</b> | 0.263   | 0.169 | 6.155  | 7.381  | 8.778    | 10.361 | 12.145 | -0.347 + (HAZ • 0.842) | 0.043  | 0.169 | 6.356  | 7.543  | 8.940    | 10.583 | 12.513 | -0.136 + (HAZ • 0.823) |
| <b>11.0-11.9</b> | 0.242   | 0.167 | 7.133  | 8.525  | 10.114   | 11.918 | 13.956 | -0.290 + (HAZ • 0.890) | 0.074  | 0.169 | 7.365  | 8.753  | 10.378   | 12.280 | 14.501 | -0.322 + (HAZ • 0.915) |
| <b>12.0-12.0</b> | 0.222   | 0.165 | 8.070  | 9.607  | 11.363   | 13.359 | 15.618 | -0.117 + (HAZ • 0.804) | 0.104  | 0.168 | 8.596  | 10.218 | 12.108   | 14.306 | 16.855 | -0.369 + (HAZ • 0.951) |
| <b>13.0-13.9</b> | 0.201   | 0.162 | 8.852  | 10.495 | 12.374   | 14.511 | 16.934 | 0.009 + (HAZ • 0.626)  | 0.135  | 0.166 | 9.967  | 11.836 | 14.000   | 16.499 | 19.374 | -0.235 + (HAZ • 0.880) |
| <b>14.0-14.0</b> | 0.181   | 0.159 | 9.423  | 11.132 | 13.086   | 15.312 | 17.840 | -0.010 + (HAZ • 0.571) | 0.165  | 0.163 | 11.320 | 13.415 | 15.823   | 18.583 | 21.733 | -0.063 + (HAZ • 0.772) |
| <b>15.0-15.9</b> | 0.160   | 0.157 | 9.791  | 11.531 | 13.524   | 15.799 | 18.387 | -0.045 + (HAZ • 0.511) | 0.196  | 0.159 | 12.490 | 14.761 | 17.354   | 20.300 | 23.636 | 0.068 + (HAZ • 0.598)  |
| <b>16.0-16.0</b> | 0.140   | 0.156 | 9.997  | 11.749 | 13.759   | 16.058 | 18.679 | -0.086 + (HAZ • 0.516) | 0.226  | 0.155 | 13.381 | 15.768 | 18.472   | 21.522 | 24.947 | 0.021 + (HAZ • 0.554)  |
| <b>17.0-17.9</b> | 0.119   | 0.156 | 10.099 | 11.851 | 13.866   | 16.178 | 18.821 | -0.079 + (HAZ • 0.558) | 0.257  | 0.152 | 13.990 | 16.438 | 19.190   | 22.272 | 25.706 | -0.034 + (HAZ • 0.534) |
| <b>18.0-18.9</b> | 0.099   | 0.155 | 10.138 | 11.886 | 13.902   | 16.221 | 18.883 | -0.031 + (HAZ • 0.492) | 0.287  | 0.148 | 14.380 | 16.846 | 19.601   | 22.662 | 26.050 | -0.036 + (HAZ • 0.522) |
| <b>19.0-19.9</b> | 0.078   | 0.156 | 10.141 | 11.883 | 13.896   | 16.220 | 18.898 | -0.032 + (HAZ • 0.554) | 0.318  | 0.145 | 14.637 | 17.098 | 19.827   | 22.839 | 26.150 | -0.142 + (HAZ • 0.638) |

**Table S15. Fat Mass, kg**

| Age, y    | Females |       |       |        |          |        |        |                        | Males  |       |       |       |          |        |        |                        |
|-----------|---------|-------|-------|--------|----------|--------|--------|------------------------|--------|-------|-------|-------|----------|--------|--------|------------------------|
|           | L       | S     | -2 SD | -1 SD  | 0 SD (M) | 1 SD   | 2 SD   | HAZ Adjustment         | L      | S     | -2 SD | -1 SD | 0 SD (M) | 1 SD   | 2 SD   | HAZ Adjustment         |
| 5.0-5.9   | -0.136  | 0.290 | 2.964 | 3.898  | 5.182    | 6.968  | 9.486  | -0.002 + (haz • 0.341) | -0.169 | 0.296 | 2.386 | 3.143 | 4.196    | 5.685  | 7.830  | 0.055 + (haz • 0.358)  |
| 6.0-6.9   | -0.148  | 0.303 | 3.231 | 4.292  | 5.772    | 7.868  | 10.885 | -0.127 + (haz • 0.426) | -0.202 | 0.315 | 2.596 | 3.462 | 4.700    | 6.512  | 9.231  | -0.119 + (haz • 0.344) |
| 7.0-7.0   | -0.159  | 0.315 | 3.580 | 4.800  | 6.530    | 9.025  | 12.695 | -0.033 + (haz • 0.495) | -0.237 | 0.335 | 2.848 | 3.844 | 5.309    | 7.530  | 11.023 | -0.143 + (haz • 0.409) |
| 8.0-8.9   | -0.171  | 0.327 | 4.012 | 5.427  | 7.462    | 10.449 | 14.936 | -0.042 + (haz • 0.526) | -0.272 | 0.355 | 3.154 | 4.302 | 6.041    | 8.778  | 13.309 | -0.115 + (haz • 0.452) |
| 9.0-9.9   | -0.182  | 0.337 | 4.507 | 6.139  | 8.516    | 12.062 | 17.491 | -0.055 + (haz • 0.443) | -0.309 | 0.374 | 3.486 | 4.796 | 6.834    | 10.171 | 16.003 | 0.013 + (haz • 0.400)  |
| 10.0-10.9 | -0.194  | 0.345 | 5.045 | 6.902  | 9.635    | 13.764 | 20.191 | -0.079 + (haz • 0.405) | -0.347 | 0.390 | 3.804 | 5.263 | 7.591    | 11.546 | 18.867 | 0.025 + (haz • 0.473)  |
| 11.0-11.9 | -0.205  | 0.349 | 5.626 | 7.709  | 10.796   | 15.503 | 22.919 | -0.127 + (haz • 0.382) | -0.385 | 0.403 | 4.076 | 5.656 | 8.229    | 12.754 | 21.610 | 0.020 + (haz • 0.418)  |
| 12.0-12.0 | -0.217  | 0.350 | 6.277 | 8.593  | 12.037   | 17.315 | 25.696 | -0.157 + (haz • 0.363) | -0.421 | 0.412 | 4.297 | 5.963 | 8.721    | 13.714 | 24.001 | -0.024 + (haz • 0.268) |
| 13.0-13.9 | -0.229  | 0.348 | 7.000 | 9.554  | 13.355   | 19.193 | 28.504 | -0.055 + (haz • 0.256) | -0.452 | 0.418 | 4.476 | 6.202 | 9.092    | 14.441 | 25.937 | -0.031 + (haz • 0.161) |
| 14.0-14.0 | -0.240  | 0.345 | 7.729 | 10.508 | 14.641   | 20.994 | 31.151 | 0.040 + (haz • 0.118)  | -0.474 | 0.420 | 4.636 | 6.411 | 9.402    | 15.018 | 27.443 | -0.016 + (haz • 0.056) |
| 15.0-15.9 | -0.252  | 0.342 | 8.379 | 11.349 | 15.762   | 22.550 | 33.426 | 0.023 + (haz • 0.050)  | -0.486 | 0.420 | 4.800 | 6.627 | 9.716    | 15.550 | 28.638 | -0.087 + (haz • 0.053) |
| 16.0-16.0 | -0.263  | 0.340 | 8.905 | 12.023 | 16.658   | 23.797 | 35.277 | 0.010 + (haz • 0.041)  | -0.486 | 0.420 | 4.983 | 6.878 | 10.080   | 16.126 | 29.673 | -0.084 + (haz • 0.046) |
| 17.0-17.9 | -0.275  | 0.340 | 9.308 | 12.539 | 17.348   | 24.777 | 36.787 | -0.074 + (haz • 0.078) | -0.475 | 0.420 | 5.187 | 7.169 | 10.510   | 16.781 | 30.658 | -0.061 + (haz • 0.034) |
| 18.0-18.9 | -0.286  | 0.340 | 9.610 | 12.927 | 17.875   | 25.549 | 38.038 | 0.018 + (haz • -0.008) | -0.456 | 0.419 | 5.402 | 7.487 | 10.988   | 17.496 | 31.605 | 0.089 + (haz • -0.096) |
| 19.0-19.9 | -0.298  | 0.340 | 9.817 | 13.191 | 18.238   | 26.105 | 39.005 | 0.105 + (haz • 0.131)  | -0.430 | 0.419 | 5.611 | 7.809 | 11.480   | 18.227 | 32.480 | 0.065 + (haz • 0.000)  |

**Table S16. Appendicular Lean Soft Tissue Mass Index, kg/m<sup>2</sup>**

| Non-Black Children |         |       |       |       |          |       |       |        |       |       |       |          |        |        |
|--------------------|---------|-------|-------|-------|----------|-------|-------|--------|-------|-------|-------|----------|--------|--------|
| Age, y             | Females |       |       |       |          |       |       | Males  |       |       |       |          |        |        |
|                    | L       | S     | -2 SD | -1 SD | 0 SD (M) | 1 SD  | 2 SD  | L      | S     | -2 SD | -1 SD | 0 SD (M) | 1 SD   | 2 SD   |
| 5.0-5.9            | 1.449   | 0.112 | 3.134 | 3.637 | 4.111    | 4.562 | 4.993 | 0.472  | 0.102 | 3.577 | 3.993 | 4.432    | 4.896  | 5.384  |
| 6.0-6.9            | 1.288   | 0.113 | 3.336 | 3.858 | 4.359    | 4.845 | 5.317 | 0.445  | 0.103 | 3.764 | 4.207 | 4.676    | 5.173  | 5.699  |
| 7.0-7.0            | 1.128   | 0.114 | 3.541 | 4.079 | 4.609    | 5.131 | 5.647 | 0.417  | 0.105 | 3.951 | 4.420 | 4.920    | 5.452  | 6.016  |
| 8.0-8.9            | 0.968   | 0.115 | 3.751 | 4.306 | 4.865    | 5.425 | 5.987 | 0.389  | 0.106 | 4.134 | 4.631 | 5.162    | 5.729  | 6.333  |
| 9.0-9.9            | 0.807   | 0.116 | 3.971 | 4.545 | 5.133    | 5.735 | 6.349 | 0.361  | 0.108 | 4.323 | 4.848 | 5.412    | 6.016  | 6.662  |
| 10.0-10.9          | 0.647   | 0.117 | 4.203 | 4.796 | 5.416    | 6.061 | 6.732 | 0.333  | 0.109 | 4.535 | 5.091 | 5.692    | 6.338  | 7.031  |
| 11.0-11.9          | 0.486   | 0.118 | 4.436 | 5.046 | 5.697    | 6.388 | 7.120 | 0.306  | 0.111 | 4.790 | 5.385 | 6.029    | 6.724  | 7.474  |
| 12.0-12.0          | 0.326   | 0.119 | 4.648 | 5.273 | 5.952    | 6.688 | 7.482 | 0.278  | 0.113 | 5.099 | 5.738 | 6.434    | 7.189  | 8.005  |
| 13.0-13.9          | 0.165   | 0.120 | 4.825 | 5.458 | 6.160    | 6.935 | 7.790 | 0.250  | 0.114 | 5.443 | 6.133 | 6.887    | 7.708  | 8.600  |
| 14.0-14.0          | 0.005   | 0.121 | 4.959 | 5.595 | 6.313    | 7.123 | 8.035 | 0.222  | 0.116 | 5.782 | 6.523 | 7.336    | 8.225  | 9.196  |
| 15.0-15.9          | -0.155  | 0.122 | 5.053 | 5.688 | 6.417    | 7.255 | 8.223 | 0.195  | 0.118 | 6.071 | 6.856 | 7.722    | 8.674  | 9.718  |
| 16.0-16.0          | -0.316  | 0.123 | 5.116 | 5.745 | 6.480    | 7.343 | 8.364 | 0.167  | 0.119 | 6.282 | 7.104 | 8.013    | 9.018  | 10.125 |
| 17.0-17.9          | -0.476  | 0.124 | 5.157 | 5.778 | 6.516    | 7.401 | 8.476 | 0.139  | 0.121 | 6.424 | 7.272 | 8.216    | 9.263  | 10.423 |
| 18.0-18.9          | -0.637  | 0.125 | 5.186 | 5.797 | 6.536    | 7.443 | 8.574 | 0.111  | 0.123 | 6.516 | 7.386 | 8.357    | 9.440  | 10.647 |
| 19.0-19.9          | -0.797  | 0.126 | 5.208 | 5.810 | 6.549    | 7.476 | 8.669 | 0.083  | 0.124 | 6.583 | 7.471 | 8.466    | 9.583  | 10.832 |
| Black Children     |         |       |       |       |          |       |       |        |       |       |       |          |        |        |
| Age, y             | Females |       |       |       |          |       |       | Males  |       |       |       |          |        |        |
|                    | L       | S     | -2 SD | -1 SD | 0 SD (M) | 1 SD  | 2 SD  | L      | S     | -2 SD | -1 SD | 0 SD (M) | 1 SD   | 2 SD   |
| 5.0-5.9            | -0.477  | 0.090 | 3.841 | 4.181 | 4.568    | 5.010 | 5.518 | 1.311  | 0.114 | 3.794 | 4.395 | 4.971    | 5.528  | 6.067  |
| 6.0-6.9            | -0.449  | 0.092 | 4.089 | 4.460 | 4.883    | 5.366 | 5.921 | 1.055  | 0.113 | 4.078 | 4.682 | 5.283    | 5.879  | 6.472  |
| 7.0-7.0            | -0.421  | 0.094 | 4.335 | 4.739 | 5.199    | 5.725 | 6.330 | 0.799  | 0.113 | 4.357 | 4.964 | 5.586    | 6.223  | 6.873  |
| 8.0-8.9            | -0.394  | 0.097 | 4.583 | 5.022 | 5.521    | 6.093 | 6.750 | 0.543  | 0.112 | 4.632 | 5.241 | 5.884    | 6.561  | 7.271  |
| 9.0-9.9            | -0.366  | 0.099 | 4.832 | 5.307 | 5.848    | 6.467 | 7.179 | 0.286  | 0.112 | 4.914 | 5.525 | 6.189    | 6.908  | 7.685  |
| 10.0-10.9          | -0.338  | 0.101 | 5.075 | 5.587 | 6.170    | 6.838 | 7.606 | 0.030  | 0.111 | 5.219 | 5.836 | 6.523    | 7.288  | 8.140  |
| 11.0-11.9          | -0.310  | 0.103 | 5.298 | 5.847 | 6.473    | 7.190 | 8.014 | -0.226 | 0.111 | 5.560 | 6.186 | 6.900    | 7.717  | 8.656  |
| 12.0-12.0          | -0.282  | 0.106 | 5.490 | 6.074 | 6.740    | 7.503 | 8.381 | -0.482 | 0.110 | 5.937 | 6.575 | 7.319    | 8.195  | 9.236  |
| 13.0-13.9          | -0.254  | 0.108 | 5.642 | 6.259 | 6.963    | 7.769 | 8.696 | -0.738 | 0.110 | 6.329 | 6.978 | 7.753    | 8.691  | 9.845  |
| 14.0-14.0          | -0.227  | 0.110 | 5.754 | 6.401 | 7.139    | 7.984 | 8.955 | -0.994 | 0.109 | 6.704 | 7.363 | 8.166    | 9.164  | 10.439 |
| 15.0-15.9          | -0.199  | 0.113 | 5.831 | 6.505 | 7.274    | 8.154 | 9.166 | -1.250 | 0.108 | 7.035 | 7.699 | 8.523    | 9.577  | 10.977 |
| 16.0-16.0          | -0.171  | 0.116 | 5.881 | 6.580 | 7.377    | 8.291 | 9.339 | -1.506 | 0.108 | 7.302 | 7.965 | 8.803    | 9.903  | 11.429 |
| 17.0-17.9          | -0.143  | 0.118 | 5.911 | 6.633 | 7.458    | 8.402 | 9.485 | -1.762 | 0.107 | 7.498 | 8.153 | 8.996    | 10.133 | 11.784 |
| 18.0-18.9          | -0.115  | 0.121 | 5.925 | 6.669 | 7.520    | 8.493 | 9.608 | -2.019 | 0.107 | 7.623 | 8.266 | 9.106    | 10.271 | 12.046 |
| 19.0-19.9          | -0.087  | 0.124 | 5.926 | 6.692 | 7.567    | 8.568 | 9.715 | -2.275 | 0.106 | 7.696 | 8.322 | 9.154    | 10.339 | 12.244 |

**Table S17. Fat Mass Index, kg/m<sup>2</sup>**

| <b>Non-Black Children</b> |         |       |       |       |          |       |        |        |       |       |       |          |       |        |
|---------------------------|---------|-------|-------|-------|----------|-------|--------|--------|-------|-------|-------|----------|-------|--------|
| Age, y                    | Females |       |       |       |          |       |        | Males  |       |       |       |          |       |        |
|                           | L       | S     | -2 SD | -1 SD | 0 SD (M) | 1 SD  | 2 SD   | L      | S     | -2 SD | -1 SD | 0 SD (M) | 1 SD  | 2 SD   |
| 5.0-5.9                   | -0.321  | 0.230 | 2.633 | 3.238 | 4.041    | 5.130 | 6.643  | -0.281 | 0.221 | 2.254 | 2.759 | 3.418    | 4.292 | 5.474  |
| 6.0-6.9                   | -0.317  | 0.253 | 2.595 | 3.252 | 4.146    | 5.394 | 7.189  | -0.302 | 0.255 | 2.095 | 2.633 | 3.365    | 4.386 | 5.850  |
| 7.0-7.0                   | -0.313  | 0.276 | 2.560 | 3.270 | 4.263    | 5.692 | 7.822  | -0.324 | 0.292 | 1.997 | 2.578 | 3.408    | 4.630 | 6.507  |
| 8.0-8.9                   | -0.309  | 0.300 | 2.534 | 3.298 | 4.393    | 6.018 | 8.526  | -0.345 | 0.328 | 1.968 | 2.606 | 3.556    | 5.039 | 7.487  |
| 9.0-9.9                   | -0.305  | 0.320 | 2.527 | 3.342 | 4.535    | 6.351 | 9.243  | -0.366 | 0.360 | 1.979 | 2.673 | 3.748    | 5.512 | 8.639  |
| 10.0-10.9                 | -0.300  | 0.335 | 2.547 | 3.407 | 4.687    | 6.671 | 9.899  | -0.388 | 0.383 | 1.988 | 2.721 | 3.890    | 5.892 | 9.667  |
| 11.0-11.9                 | -0.296  | 0.342 | 2.604 | 3.505 | 4.856    | 6.967 | 10.436 | -0.409 | 0.399 | 1.962 | 2.705 | 3.914    | 6.053 | 10.291 |
| 12.0-12.0                 | -0.292  | 0.342 | 2.708 | 3.647 | 5.055    | 7.251 | 10.855 | -0.431 | 0.408 | 1.892 | 2.614 | 3.806    | 5.960 | 10.396 |
| 13.0-13.9                 | -0.288  | 0.337 | 2.857 | 3.835 | 5.291    | 7.544 | 11.201 | -0.452 | 0.411 | 1.798 | 2.481 | 3.615    | 5.693 | 10.089 |
| 14.0-14.0                 | -0.284  | 0.330 | 3.036 | 4.054 | 5.556    | 7.854 | 11.532 | -0.473 | 0.408 | 1.719 | 2.361 | 3.428    | 5.397 | 9.624  |
| 15.0-15.9                 | -0.280  | 0.323 | 3.220 | 4.280 | 5.830    | 8.179 | 11.889 | -0.495 | 0.402 | 1.685 | 2.299 | 3.317    | 5.195 | 9.254  |
| 16.0-16.0                 | -0.276  | 0.319 | 3.389 | 4.492 | 6.098    | 8.515 | 12.301 | -0.516 | 0.395 | 1.709 | 2.314 | 3.316    | 5.160 | 9.158  |
| 17.0-17.9                 | -0.272  | 0.319 | 3.528 | 4.678 | 6.350    | 8.862 | 12.786 | -0.538 | 0.390 | 1.784 | 2.403 | 3.424    | 5.306 | 9.421  |
| 18.0-18.9                 | -0.268  | 0.321 | 3.640 | 4.838 | 6.585    | 9.216 | 13.334 | -0.559 | 0.389 | 1.889 | 2.535 | 3.604    | 5.587 | 10.000 |
| 19.0-19.9                 | -0.264  | 0.326 | 3.728 | 4.976 | 6.803    | 9.566 | 13.913 | -0.581 | 0.391 | 1.998 | 2.676 | 3.805    | 5.926 | 10.773 |

  

| <b>Black Children</b> |         |       |       |       |          |        |        |        |       |       |       |          |       |        |
|-----------------------|---------|-------|-------|-------|----------|--------|--------|--------|-------|-------|-------|----------|-------|--------|
| Age, y                | Females |       |       |       |          |        |        | Males  |       |       |       |          |       |        |
|                       | L       | S     | -2 SD | -1 SD | 0 SD (M) | 1 SD   | 2 SD   | L      | S     | -2 SD | -1 SD | 0 SD (M) | 1 SD  | 2 SD   |
| 5.0-5.9               | -0.194  | 0.266 | 2.290 | 2.932 | 3.800    | 4.994  | 6.663  | -0.790 | 0.242 | 1.958 | 2.364 | 2.950    | 3.857 | 5.423  |
| 6.0-6.9               | -0.193  | 0.289 | 2.242 | 2.928 | 3.879    | 5.222  | 7.160  | -0.760 | 0.274 | 1.900 | 2.343 | 3.005    | 4.087 | 6.107  |
| 7.0-7.0               | -0.192  | 0.313 | 2.210 | 2.944 | 3.989    | 5.506  | 7.765  | -0.731 | 0.308 | 1.842 | 2.320 | 3.064    | 4.346 | 6.957  |
| 8.0-8.9               | -0.192  | 0.334 | 2.206 | 2.993 | 4.139    | 5.847  | 8.465  | -0.706 | 0.342 | 1.786 | 2.298 | 3.122    | 4.618 | 7.950  |
| 9.0-9.9               | -0.191  | 0.351 | 2.236 | 3.077 | 4.324    | 6.222  | 9.198  | -0.688 | 0.373 | 1.735 | 2.273 | 3.167    | 4.870 | 9.000  |
| 10.0-10.9             | -0.190  | 0.362 | 2.302 | 3.197 | 4.539    | 6.607  | 9.900  | -0.678 | 0.397 | 1.688 | 2.242 | 3.187    | 5.063 | 9.979  |
| 11.0-11.9             | -0.189  | 0.366 | 2.409 | 3.357 | 4.785    | 6.995  | 10.533 | -0.678 | 0.415 | 1.645 | 2.204 | 3.176    | 5.167 | 10.735 |
| 12.0-12.0             | -0.189  | 0.364 | 2.560 | 3.563 | 5.068    | 7.393  | 11.102 | -0.686 | 0.423 | 1.609 | 2.163 | 3.136    | 5.170 | 11.134 |
| 13.0-13.9             | -0.188  | 0.360 | 2.742 | 3.801 | 5.383    | 7.811  | 11.658 | -0.699 | 0.424 | 1.581 | 2.123 | 3.079    | 5.094 | 11.151 |
| 14.0-14.0             | -0.187  | 0.357 | 2.922 | 4.041 | 5.708    | 8.257  | 12.276 | -0.711 | 0.421 | 1.561 | 2.089 | 3.020    | 4.983 | 10.925 |
| 15.0-15.9             | -0.187  | 0.359 | 3.069 | 4.253 | 6.021    | 8.730  | 13.014 | -0.719 | 0.418 | 1.546 | 2.064 | 2.974    | 4.890 | 10.681 |
| 16.0-16.0             | -0.186  | 0.367 | 3.166 | 4.419 | 6.306    | 9.226  | 13.897 | -0.721 | 0.417 | 1.536 | 2.050 | 2.951    | 4.845 | 10.551 |
| 17.0-17.9             | -0.185  | 0.381 | 3.213 | 4.536 | 6.556    | 9.735  | 14.914 | -0.715 | 0.418 | 1.532 | 2.046 | 2.949    | 4.844 | 10.528 |
| 18.0-18.9             | -0.185  | 0.398 | 3.219 | 4.609 | 6.768    | 10.236 | 16.019 | -0.703 | 0.420 | 1.530 | 2.050 | 2.962    | 4.873 | 10.553 |
| 19.0-19.9             | -0.184  | 0.417 | 3.198 | 4.649 | 6.948    | 10.722 | 17.181 | -0.686 | 0.423 | 1.529 | 2.056 | 2.982    | 4.917 | 10.593 |

**Table S18. Total Lean Soft Tissue Mass Index, kg/m<sup>2</sup>**

| Non-Black Children |         |       |        |        |          |        |        |        |       |        |        |          |        |        |
|--------------------|---------|-------|--------|--------|----------|--------|--------|--------|-------|--------|--------|----------|--------|--------|
| Age, y             | Females |       |        |        |          |        |        | Males  |       |        |        |          |        |        |
|                    | L       | S     | -2 SD  | -1 SD  | 0 SD (M) | 1 SD   | 2 SD   | L      | S     | -2 SD  | -1 SD  | 0 SD (M) | 1 SD   | 2 SD   |
| 5.0-5.9            | 1.177   | 0.088 | 9.055  | 10.052 | 11.032   | 11.997 | 12.948 | -0.245 | 0.070 | 10.282 | 11.005 | 11.793   | 12.652 | 13.590 |
| 6.0-6.9            | 1.030   | 0.089 | 9.265  | 10.276 | 11.283   | 12.288 | 13.291 | -0.224 | 0.073 | 10.403 | 11.174 | 12.017   | 12.938 | 13.948 |
| 7.0-7.0            | 0.883   | 0.090 | 9.488  | 10.512 | 11.549   | 12.597 | 13.655 | -0.203 | 0.077 | 10.532 | 11.356 | 12.258   | 13.248 | 14.335 |
| 8.0-8.9            | 0.735   | 0.091 | 9.743  | 10.785 | 11.855   | 12.951 | 14.072 | -0.183 | 0.081 | 10.678 | 11.559 | 12.526   | 13.591 | 14.765 |
| 9.0-9.9            | 0.588   | 0.092 | 10.056 | 11.121 | 12.231   | 13.383 | 14.577 | -0.162 | 0.085 | 10.856 | 11.800 | 12.840   | 13.989 | 15.259 |
| 10.0-10.9          | 0.441   | 0.094 | 10.439 | 11.534 | 12.690   | 13.909 | 15.190 | -0.142 | 0.089 | 11.093 | 12.108 | 13.231   | 14.475 | 15.854 |
| 11.0-11.9          | 0.293   | 0.095 | 10.873 | 12.002 | 13.212   | 14.505 | 15.886 | -0.121 | 0.093 | 11.423 | 12.522 | 13.740   | 15.092 | 16.596 |
| 12.0-12.0          | 0.146   | 0.096 | 11.313 | 12.477 | 13.741   | 15.113 | 16.601 | -0.100 | 0.097 | 11.864 | 13.057 | 14.383   | 15.859 | 17.504 |
| 13.0-13.9          | -0.001  | 0.097 | 11.710 | 12.903 | 14.217   | 15.666 | 17.262 | -0.080 | 0.101 | 12.397 | 13.693 | 15.136   | 16.744 | 18.539 |
| 14.0-14.0          | -0.148  | 0.098 | 12.035 | 13.249 | 14.606   | 16.124 | 17.826 | -0.059 | 0.103 | 12.968 | 14.367 | 15.927   | 17.667 | 19.610 |
| 15.0-15.9          | -0.296  | 0.099 | 12.281 | 13.507 | 14.897   | 16.478 | 18.283 | -0.039 | 0.105 | 13.513 | 15.007 | 16.674   | 18.533 | 20.608 |
| 16.0-16.0          | -0.443  | 0.101 | 12.454 | 13.685 | 15.100   | 16.736 | 18.641 | -0.018 | 0.107 | 13.989 | 15.564 | 17.320   | 19.278 | 21.463 |
| 17.0-17.9          | -0.590  | 0.102 | 12.572 | 13.803 | 15.237   | 16.923 | 18.927 | 0.003  | 0.108 | 14.383 | 16.025 | 17.853   | 19.889 | 22.157 |
| 18.0-18.9          | -0.738  | 0.103 | 12.656 | 13.883 | 15.332   | 17.065 | 19.170 | 0.023  | 0.109 | 14.707 | 16.402 | 18.287   | 20.383 | 22.714 |
| 19.0-19.9          | -0.885  | 0.104 | 12.717 | 13.938 | 15.399   | 17.179 | 19.391 | 0.044  | 0.109 | 14.981 | 16.720 | 18.650   | 20.793 | 23.170 |
| Black Children     |         |       |        |        |          |        |        |        |       |        |        |          |        |        |
| Age, y             | Females |       |        |        |          |        |        | Males  |       |        |        |          |        |        |
|                    | L       | S     | -2 SD  | -1 SD  | 0 SD (M) | 1 SD   | 2 SD   | L      | S     | -2 SD  | -1 SD  | 0 SD (M) | 1 SD   | 2 SD   |
| 5.0-5.9            | -0.694  | 0.075 | 9.954  | 10.673 | 11.484   | 12.406 | 13.460 | 0.749  | 0.077 | 10.371 | 11.283 | 12.215   | 13.165 | 14.132 |
| 6.0-6.9            | -0.631  | 0.077 | 10.168 | 10.924 | 11.778   | 12.745 | 13.849 | 0.539  | 0.083 | 10.551 | 11.530 | 12.548   | 13.607 | 14.704 |
| 7.0-7.0            | -0.567  | 0.079 | 10.402 | 11.200 | 12.098   | 13.115 | 14.272 | 0.329  | 0.088 | 10.748 | 11.781 | 12.879   | 14.044 | 15.278 |
| 8.0-8.9            | -0.504  | 0.081 | 10.693 | 11.539 | 12.490   | 13.564 | 14.783 | 0.118  | 0.092 | 10.984 | 12.056 | 13.220   | 14.481 | 15.848 |
| 9.0-9.9            | -0.441  | 0.083 | 11.063 | 11.967 | 12.980   | 14.122 | 15.415 | -0.092 | 0.094 | 11.282 | 12.382 | 13.600   | 14.950 | 16.447 |
| 10.0-10.9          | -0.378  | 0.085 | 11.506 | 12.475 | 13.561   | 14.781 | 16.158 | -0.303 | 0.096 | 11.661 | 12.787 | 14.059   | 15.501 | 17.142 |
| 11.0-11.9          | -0.315  | 0.087 | 11.977 | 13.019 | 14.184   | 15.490 | 16.958 | -0.513 | 0.098 | 12.133 | 13.294 | 14.632   | 16.184 | 18.000 |
| 12.0-12.0          | -0.252  | 0.089 | 12.417 | 13.533 | 14.777   | 16.169 | 17.728 | -0.724 | 0.100 | 12.710 | 13.911 | 15.322   | 17.000 | 19.022 |
| 13.0-13.9          | -0.189  | 0.091 | 12.775 | 13.962 | 15.282   | 16.754 | 18.396 | -0.934 | 0.101 | 13.376 | 14.611 | 16.089   | 17.885 | 20.115 |
| 14.0-14.0          | -0.125  | 0.093 | 13.032 | 14.284 | 15.673   | 17.216 | 18.932 | -1.145 | 0.100 | 14.079 | 15.337 | 16.863   | 18.758 | 21.176 |
| 15.0-15.9          | -0.062  | 0.096 | 13.199 | 14.511 | 15.963   | 17.569 | 19.349 | -1.355 | 0.099 | 14.740 | 16.012 | 17.578   | 19.559 | 22.160 |
| 16.0-16.0          | 0.001   | 0.098 | 13.305 | 14.674 | 16.183   | 17.849 | 19.685 | -1.565 | 0.099 | 15.300 | 16.581 | 18.180   | 20.245 | 23.042 |
| 17.0-17.9          | 0.064   | 0.100 | 13.368 | 14.793 | 16.359   | 18.080 | 19.969 | -1.776 | 0.099 | 15.736 | 17.017 | 18.637   | 20.774 | 23.766 |
| 18.0-18.9          | 0.127   | 0.103 | 13.391 | 14.871 | 16.492   | 18.265 | 20.201 | -1.986 | 0.098 | 16.042 | 17.313 | 18.941   | 21.134 | 24.314 |
| 19.0-19.9          | 0.190   | 0.105 | 13.376 | 14.910 | 16.582   | 18.404 | 20.384 | -2.197 | 0.099 | 16.223 | 17.481 | 19.115   | 21.366 | 24.765 |



**Table S19. Subtotal Lean Soft Tissue Mass Index, kg/m<sup>2</sup>**

| Non-Black Children |         |       |        |        |          |        |        |        |       |        |        |          |        |        |
|--------------------|---------|-------|--------|--------|----------|--------|--------|--------|-------|--------|--------|----------|--------|--------|
| Age, y             | Females |       |        |        |          |        |        | Males  |       |        |        |          |        |        |
|                    | L       | S     | -2 SD  | -1 SD  | 0 SD (M) | 1 SD   | 2 SD   | L      | S     | -2 SD  | -1 SD  | 0 SD (M) | 1 SD   | 2 SD   |
| 5.0-5.9            | 1.155   | 0.100 | 7.421  | 8.373  | 9.308    | 10.229 | 11.137 | -0.106 | 0.081 | 8.435  | 9.140  | 9.911    | 10.755 | 11.679 |
| 6.0-6.9            | 1.023   | 0.100 | 7.713  | 8.686  | 9.656    | 10.623 | 11.589 | -0.091 | 0.084 | 8.671  | 9.425  | 10.251   | 11.157 | 12.151 |
| 7.0-7.0            | 0.891   | 0.101 | 7.996  | 8.987  | 9.991    | 11.005 | 12.030 | -0.077 | 0.087 | 8.911  | 9.717  | 10.602   | 11.574 | 12.643 |
| 8.0-8.9            | 0.759   | 0.102 | 8.289  | 9.299  | 10.337   | 11.400 | 12.488 | -0.062 | 0.091 | 9.157  | 10.019 | 10.968   | 12.013 | 13.164 |
| 9.0-9.9            | 0.627   | 0.102 | 8.643  | 9.679  | 10.759   | 11.881 | 13.043 | -0.047 | 0.094 | 9.425  | 10.349 | 11.368   | 12.494 | 13.736 |
| 10.0-10.9          | 0.495   | 0.103 | 9.099  | 10.173 | 11.307   | 12.502 | 13.758 | -0.033 | 0.098 | 9.743  | 10.738 | 11.838   | 13.055 | 14.402 |
| 11.0-11.9          | 0.363   | 0.104 | 9.636  | 10.755 | 11.954   | 13.235 | 14.600 | -0.018 | 0.101 | 10.147 | 11.224 | 12.418   | 13.742 | 15.210 |
| 12.0-12.0          | 0.231   | 0.104 | 10.171 | 11.335 | 12.598   | 13.966 | 15.446 | -0.003 | 0.104 | 10.653 | 11.825 | 13.127   | 14.573 | 16.178 |
| 13.0-13.9          | 0.099   | 0.105 | 10.622 | 11.818 | 13.134   | 14.581 | 16.170 | 0.012  | 0.107 | 11.240 | 12.515 | 13.934   | 15.511 | 17.265 |
| 14.0-14.0          | -0.033  | 0.106 | 10.960 | 12.176 | 13.531   | 15.043 | 16.730 | 0.026  | 0.110 | 11.853 | 13.231 | 14.766   | 16.473 | 18.372 |
| 15.0-15.9          | -0.165  | 0.106 | 11.198 | 12.422 | 13.804   | 15.369 | 17.145 | 0.041  | 0.111 | 12.426 | 13.899 | 15.538   | 17.361 | 19.389 |
| 16.0-16.0          | -0.297  | 0.107 | 11.352 | 12.575 | 13.973   | 15.581 | 17.436 | 0.056  | 0.112 | 12.917 | 14.469 | 16.195   | 18.114 | 20.246 |
| 17.0-17.9          | -0.429  | 0.108 | 11.456 | 12.672 | 14.081   | 15.724 | 17.657 | 0.070  | 0.113 | 13.318 | 14.932 | 16.726   | 18.720 | 20.932 |
| 18.0-18.9          | -0.561  | 0.109 | 11.539 | 12.746 | 14.163   | 15.841 | 17.852 | 0.085  | 0.113 | 13.641 | 15.304 | 17.152   | 19.201 | 21.472 |
| 19.0-19.9          | -0.693  | 0.109 | 11.607 | 12.804 | 14.226   | 15.938 | 18.030 | 0.100  | 0.114 | 13.911 | 15.614 | 17.502   | 19.594 | 21.908 |
| Black Children     |         |       |        |        |          |        |        |        |       |        |        |          |        |        |
| Age, y             | Females |       |        |        |          |        |        | Males  |       |        |        |          |        |        |
|                    | L       | S     | -2 SD  | -1 SD  | 0 SD (M) | 1 SD   | 2 SD   | L      | S     | -2 SD  | -1 SD  | 0 SD (M) | 1 SD   | 2 SD   |
| 5.0-5.9            | -0.725  | 0.084 | 8.268  | 8.931  | 9.691    | 10.570 | 11.597 | 0.863  | 0.099 | 8.348  | 9.358  | 10.383   | 11.423 | 12.476 |
| 6.0-6.9            | -0.660  | 0.086 | 8.582  | 9.287  | 10.094   | 11.024 | 12.105 | 0.652  | 0.100 | 8.736  | 9.760  | 10.822   | 11.922 | 13.058 |
| 7.0-7.0            | -0.595  | 0.087 | 8.912  | 9.662  | 10.519   | 11.502 | 12.641 | 0.440  | 0.100 | 9.118  | 10.153 | 11.250   | 12.411 | 13.636 |
| 8.0-8.9            | -0.529  | 0.089 | 9.292  | 10.093 | 11.005   | 12.050 | 13.255 | 0.229  | 0.101 | 9.500  | 10.545 | 11.677   | 12.901 | 14.221 |
| 9.0-9.9            | -0.464  | 0.090 | 9.740  | 10.602 | 11.579   | 12.695 | 13.976 | 0.017  | 0.101 | 9.907  | 10.965 | 12.134   | 13.426 | 14.852 |
| 10.0-10.9          | -0.399  | 0.092 | 10.248 | 11.178 | 12.231   | 13.427 | 14.793 | -0.195 | 0.102 | 10.373 | 11.449 | 12.662   | 14.032 | 15.582 |
| 11.0-11.9          | -0.333  | 0.093 | 10.774 | 11.777 | 12.908   | 14.190 | 15.646 | -0.406 | 0.102 | 10.929 | 12.032 | 13.298   | 14.760 | 16.459 |
| 12.0-12.0          | -0.268  | 0.095 | 11.255 | 12.330 | 13.540   | 14.903 | 16.446 | -0.618 | 0.103 | 11.580 | 12.717 | 14.047   | 15.617 | 17.493 |
| 13.0-13.9          | -0.203  | 0.096 | 11.643 | 12.786 | 14.066   | 15.504 | 17.122 | -0.829 | 0.103 | 12.289 | 13.465 | 14.864   | 16.555 | 18.633 |
| 14.0-14.0          | -0.137  | 0.098 | 11.922 | 13.124 | 14.466   | 15.966 | 17.646 | -1.041 | 0.103 | 12.999 | 14.211 | 15.678   | 17.493 | 19.794 |
| 15.0-15.9          | -0.072  | 0.100 | 12.107 | 13.362 | 14.757   | 16.310 | 18.039 | -1.253 | 0.104 | 13.649 | 14.890 | 16.419   | 18.353 | 20.890 |
| 16.0-16.0          | -0.007  | 0.101 | 12.230 | 13.533 | 14.977   | 16.576 | 18.346 | -1.464 | 0.104 | 14.197 | 15.457 | 17.034   | 19.078 | 21.855 |
| 17.0-17.9          | 0.059   | 0.103 | 12.313 | 13.663 | 15.152   | 16.792 | 18.599 | -1.676 | 0.105 | 14.616 | 15.883 | 17.494   | 19.633 | 22.654 |
| 18.0-18.9          | 0.124   | 0.105 | 12.359 | 13.754 | 15.286   | 16.964 | 18.802 | -1.887 | 0.105 | 14.903 | 16.165 | 17.795   | 20.013 | 23.277 |
| 19.0-19.9          | 0.190   | 0.107 | 12.371 | 13.809 | 15.381   | 17.094 | 18.958 | -2.099 | 0.106 | 15.077 | 16.325 | 17.962   | 20.244 | 23.760 |

**Table S20. Total Lean Soft Tissue Mass, kg**

**Non-Black Children**

| Age, y    | Females |       |        |        |          |        |        |                        | Males  |       |        |        |          |        |        |                        |
|-----------|---------|-------|--------|--------|----------|--------|--------|------------------------|--------|-------|--------|--------|----------|--------|--------|------------------------|
|           | L       | S     | -2 SD  | -1 SD  | 0 SD (M) | 1 SD   | 2 SD   | HAZ equations          | L      | S     | -2 SD  | -1 SD  | 0 SD (M) | 1 SD   | 2 SD   | HAZ equations          |
| 5.0-5.9   | 0.239   | 0.133 | 10.604 | 12.194 | 13.959   | 15.913 | 18.068 | -0.158 + (haz • 0.855) | -0.216 | 0.128 | 11.721 | 13.248 | 15.024   | 17.098 | 19.531 | -0.112 + (haz • 0.840) |
| 6.0-6.9   | 0.203   | 0.133 | 12.103 | 13.901 | 15.904   | 18.132 | 20.601 | -0.060 + (haz • 0.817) | -0.183 | 0.128 | 13.313 | 15.065 | 17.096   | 19.458 | 22.217 | -0.110 + (haz • 0.787) |
| 7.0-7.0   | 0.168   | 0.133 | 13.646 | 15.653 | 17.900   | 20.409 | 23.203 | 0.041 + (haz • 0.823)  | -0.149 | 0.128 | 14.943 | 16.929 | 19.225   | 21.885 | 24.977 | -0.053 + (haz • 0.846) |
| 8.0-8.9   | 0.132   | 0.132 | 15.344 | 17.579 | 20.091   | 22.910 | 26.065 | -0.049 + (haz • 0.840) | -0.116 | 0.129 | 16.619 | 18.850 | 21.420   | 24.387 | 27.820 | 0.011 + (haz • 0.867)  |
| 9.0-9.9   | 0.097   | 0.132 | 17.373 | 19.880 | 22.709   | 25.898 | 29.484 | -0.213 + (haz • 0.886) | -0.082 | 0.129 | 18.395 | 20.889 | 23.754   | 27.048 | 30.843 | 0.032 + (haz • 0.837)  |
| 10.0-10.9 | 0.062   | 0.132 | 19.842 | 22.679 | 25.893   | 29.531 | 33.645 | -0.323 + (haz • 0.896) | -0.049 | 0.130 | 20.458 | 23.261 | 26.469   | 30.144 | 34.358 | -0.070 + (haz • 0.901) |
| 11.0-11.9 | 0.026   | 0.132 | 22.636 | 25.842 | 29.489   | 33.636 | 38.348 | -0.312 + (haz • 1.034) | -0.015 | 0.130 | 23.090 | 26.286 | 29.932   | 34.093 | 38.842 | -0.251 + (haz • 0.993) |
| 12.0-12.0 | -0.009  | 0.132 | 25.405 | 28.971 | 33.043   | 37.693 | 43.004 | -0.110 + (haz • 0.956) | 0.018  | 0.130 | 26.452 | 30.151 | 34.357   | 39.139 | 44.572 | -0.351 + (haz • 1.057) |
| 13.0-13.9 | -0.045  | 0.131 | 27.760 | 31.621 | 36.047   | 41.124 | 46.953 | 0.026 + (haz • 0.759)  | 0.051  | 0.131 | 30.360 | 34.651 | 39.513   | 45.018 | 51.245 | -0.252 + (haz • 1.039) |
| 14.0-14.0 | -0.080  | 0.131 | 29.501 | 33.567 | 38.246   | 43.637 | 49.858 | -0.049 + (haz • 0.709) | 0.085  | 0.131 | 34.327 | 39.231 | 44.768   | 51.012 | 58.043 | -0.036 + (haz • 0.895) |
| 15.0-15.9 | -0.116  | 0.131 | 30.644 | 34.830 | 39.665   | 45.261 | 51.751 | -0.053 + (haz • 0.646) | 0.118  | 0.132 | 37.809 | 43.268 | 49.411   | 56.309 | 64.044 | 0.096 + (haz • 0.678)  |
| 16.0-16.0 | -0.151  | 0.131 | 31.319 | 35.560 | 40.476   | 46.191 | 52.854 | -0.097 + (haz • 0.690) | 0.152  | 0.132 | 40.499 | 46.410 | 53.037   | 60.451 | 68.725 | 0.020 + (haz • 0.582)  |
| 17.0-17.9 | -0.186  | 0.131 | 31.696 | 35.951 | 40.901   | 46.681 | 53.455 | -0.127 + (haz • 0.688) | 0.185  | 0.133 | 42.396 | 48.652 | 55.640   | 63.426 | 72.077 | -0.040 + (haz • 0.504) |
| 18.0-18.9 | -0.222  | 0.130 | 31.915 | 36.162 | 41.120   | 46.936 | 53.788 | -0.090 + (haz • 0.709) | 0.219  | 0.133 | 43.666 | 50.182 | 57.433   | 65.478 | 74.378 | -0.035 + (haz • 0.505) |
| 19.0-19.9 | -0.257  | 0.130 | 32.051 | 36.280 | 41.235   | 47.071 | 53.984 | -0.051 + (haz • 0.656) | 0.252  | 0.133 | 44.530 | 51.249 | 58.699   | 66.930 | 75.996 | -0.082 + (haz • 0.618) |

**Black Children**

| Age, y    | Females |       |        |        |          |        |        |                        | Males  |       |        |        |          |        |        |                        |
|-----------|---------|-------|--------|--------|----------|--------|--------|------------------------|--------|-------|--------|--------|----------|--------|--------|------------------------|
|           | L       | S     | -2 SD  | -1 SD  | 0 SD (M) | 1 SD   | 2 SD   | HAZ equations          | L      | S     | -2 SD  | -1 SD  | 0 SD (M) | 1 SD   | 2 SD   | HAZ equations          |
| 5.0-5.9   | -0.149  | 0.137 | 11.149 | 12.731 | 14.576   | 16.735 | 19.270 | -0.227 + (haz • 0.706) | 0.998  | 0.115 | 12.262 | 14.102 | 15.943   | 17.784 | 19.626 | -0.329 + (haz • 0.887) |
| 6.0-6.9   | -0.113  | 0.134 | 12.917 | 14.722 | 16.813   | 19.239 | 22.062 | -0.061 + (haz • 0.770) | 0.923  | 0.120 | 13.963 | 16.133 | 18.324   | 20.537 | 22.768 | -0.212 + (haz • 0.755) |
| 7.0-7.0   | -0.078  | 0.131 | 14.813 | 16.852 | 19.197   | 21.898 | 25.012 | -0.271 + (haz • 0.847) | 0.848  | 0.125 | 15.637 | 18.145 | 20.707   | 23.318 | 25.975 | -0.176 + (haz • 0.861) |
| 8.0-8.9   | -0.043  | 0.128 | 16.987 | 19.289 | 21.919   | 24.924 | 28.362 | -0.357 + (haz • 0.925) | 0.773  | 0.130 | 17.358 | 20.220 | 23.178   | 26.224 | 29.352 | -0.170 + (haz • 0.767) |
| 9.0-9.9   | -0.008  | 0.125 | 19.542 | 22.149 | 25.107   | 28.464 | 32.273 | -0.530 + (haz • 0.859) | 0.699  | 0.134 | 19.300 | 22.552 | 25.952   | 29.492 | 33.165 | -0.230 + (haz • 0.832) |
| 10.0-10.9 | 0.028   | 0.123 | 22.430 | 25.375 | 28.695   | 32.436 | 36.649 | -0.692 + (haz • 1.100) | 0.624  | 0.137 | 21.680 | 25.380 | 29.294   | 33.416 | 37.739 | -0.352 + (haz • 0.776) |
| 11.0-11.9 | 0.063   | 0.120 | 25.420 | 28.704 | 32.383   | 36.499 | 41.103 | -0.431 + (haz • 0.936) | 0.549  | 0.140 | 24.683 | 28.899 | 33.413   | 38.221 | 43.318 | -0.629 + (haz • 0.890) |
| 12.0-12.0 | 0.098   | 0.118 | 28.193 | 31.776 | 35.765   | 40.199 | 45.124 | -0.089 + (haz • 0.768) | 0.474  | 0.140 | 28.341 | 33.119 | 38.289   | 43.856 | 49.820 | -0.640 + (haz • 0.994) |
| 13.0-13.9 | 0.133   | 0.115 | 30.508 | 34.321 | 38.540   | 43.202 | 48.344 | 0.096 + (haz • 0.602)  | 0.399  | 0.139 | 32.427 | 37.738 | 43.541   | 49.849 | 56.676 | -0.456 + (haz • 0.955) |
| 14.0-14.0 | 0.168   | 0.113 | 32.284 | 36.251 | 40.615   | 45.408 | 50.661 | 0.100 + (haz • 0.586)  | 0.325  | 0.136 | 36.555 | 42.294 | 48.613   | 55.540 | 63.105 | -0.192 + (haz • 0.790) |
| 15.0-15.9 | 0.204   | 0.110 | 33.576 | 37.632 | 42.069   | 46.913 | 52.190 | -0.024 + (haz • 0.504) | 0.250  | 0.132 | 40.332 | 46.350 | 53.018   | 60.381 | 68.485 | -0.103 + (haz • 0.607) |
| 16.0-16.0 | 0.239   | 0.108 | 34.517 | 38.615 | 43.073   | 47.912 | 53.154 | -0.130 + (haz • 0.483) | 0.175  | 0.128 | 43.477 | 49.625 | 56.472   | 64.081 | 72.516 | -0.006 + (haz • 0.537) |
| 17.0-17.9 | 0.274   | 0.106 | 35.234 | 39.344 | 43.792   | 48.593 | 53.766 | -0.020 + (haz • 0.545) | 0.100  | 0.123 | 45.859 | 52.008 | 58.889   | 66.578 | 75.158 | 0.003 + (haz • 0.634)  |
| 18.0-18.9 | 0.309   | 0.103 | 35.814 | 39.919 | 44.337   | 49.082 | 54.167 | 0.054 + (haz • 0.363)  | 0.026  | 0.119 | 47.486 | 53.539 | 60.340   | 67.980 | 76.560 | 0.016 + (haz • 0.436)  |
| 19.0-19.9 | 0.345   | 0.101 | 36.321 | 40.409 | 44.789   | 49.468 | 54.456 | -0.053 + (haz • 0.224) | -0.049 | 0.116 | 48.491 | 54.386 | 61.038   | 68.549 | 77.035 | -0.066 + (haz • 0.355) |

**Table S21. Subtotal Lean Soft Tissue Mass, kg**

| <b>Non-Black Children</b> |                |          |              |              |                 |             |             |                        |              |          |              |              |                 |             |             |                        |
|---------------------------|----------------|----------|--------------|--------------|-----------------|-------------|-------------|------------------------|--------------|----------|--------------|--------------|-----------------|-------------|-------------|------------------------|
| <b>Age, y</b>             | <b>Females</b> |          |              |              |                 |             |             |                        | <b>Males</b> |          |              |              |                 |             |             |                        |
|                           | <b>L</b>       | <b>S</b> | <b>-2 SD</b> | <b>-1 SD</b> | <b>0 SD (M)</b> | <b>1 SD</b> | <b>2 SD</b> | <b>HAZ equations</b>   | <b>L</b>     | <b>S</b> | <b>-2 SD</b> | <b>-1 SD</b> | <b>0 SD (M)</b> | <b>1 SD</b> | <b>2 SD</b> | <b>HAZ equations</b>   |
| 5.0-5.9                   | 0.329          | 0.147    | 8.585        | 10.056       | 11.688          | 13.489      | 15.468      | -0.164 + (haz • 0.882) | -0.086       | 0.140    | 9.562        | 10.969       | 12.604          | 14.507      | 16.727      | -0.110 + (haz • 0.859) |
| 6.0-6.9                   | 0.294          | 0.146    | 9.996        | 11.683       | 13.563          | 15.647      | 17.947      | -0.057 + (haz • 0.824) | -0.060       | 0.140    | 11.060       | 12.697       | 14.592          | 16.790      | 19.341      | -0.109 + (haz • 0.788) |
| 7.0-7.0                   | 0.258          | 0.145    | 11.451       | 13.355       | 15.485          | 17.858      | 20.489      | 0.041 + (haz • 0.828)  | -0.034       | 0.140    | 12.606       | 14.481       | 16.645          | 19.145      | 22.036      | -0.046 + (haz • 0.845) |
| 8.0-8.9                   | 0.223          | 0.144    | 13.058       | 15.198       | 17.601          | 20.289      | 23.286      | -0.048 + (haz • 0.843) | -0.007       | 0.140    | 14.202       | 16.325       | 18.768          | 21.580      | 24.817      | 0.014 + (haz • 0.862)  |
| 9.0-9.9                   | 0.188          | 0.144    | 14.987       | 17.408       | 20.138          | 23.205      | 26.640      | -0.218 + (haz • 0.884) | 0.019        | 0.139    | 15.902       | 18.292       | 21.033          | 24.176      | 27.779      | 0.034 + (haz • 0.828)  |
| 10.0-10.9                 | 0.153          | 0.143    | 17.345       | 20.107       | 23.232          | 26.760      | 30.731      | -0.327 + (haz • 0.891) | 0.045        | 0.139    | 17.889       | 20.591       | 23.681          | 27.211      | 31.240      | -0.073 + (haz • 0.896) |
| 11.0-11.9                 | 0.118          | 0.142    | 20.019       | 23.162       | 26.732          | 30.779      | 35.357      | -0.308 + (haz • 1.019) | 0.071        | 0.139    | 20.430       | 23.533       | 27.069          | 31.093      | 35.667      | -0.255 + (haz • 0.987) |
| 12.0-12.0                 | 0.083          | 0.141    | 22.677       | 26.188       | 30.190          | 34.747      | 39.927      | -0.106 + (haz • 0.939) | 0.097        | 0.139    | 23.672       | 27.287       | 31.393          | 36.048      | 41.318      | -0.354 + (haz • 1.051) |
| 13.0-13.9                 | 0.048          | 0.141    | 24.950       | 28.759       | 33.117          | 38.101      | 43.793      | 0.028 + (haz • 0.750)  | 0.124        | 0.139    | 27.438       | 31.650       | 36.419          | 41.806      | 47.878      | -0.251 + (haz • 1.031) |
| 14.0-14.0                 | 0.012          | 0.140    | 26.645       | 30.657       | 35.264          | 40.555      | 46.628      | -0.046 + (haz • 0.700) | 0.150        | 0.139    | 31.261       | 36.087       | 41.531          | 47.659      | 54.538      | -0.035 + (haz • 0.892) |
| 15.0-15.9                 | -0.023         | 0.139    | 27.774       | 31.900       | 36.655          | 42.137      | 48.460      | -0.047 + (haz • 0.640) | 0.176        | 0.139    | 34.628       | 40.002       | 46.045          | 52.822      | 60.399      | 0.100 + (haz • 0.674)  |
| 16.0-16.0                 | -0.058         | 0.138    | 28.456       | 32.627       | 37.450          | 43.034      | 49.507      | -0.097 + (haz • 0.689) | 0.202        | 0.139    | 37.247       | 43.059       | 49.573          | 56.850      | 64.955      | 0.025 + (haz • 0.584)  |
| 17.0-17.9                 | -0.093         | 0.138    | 28.851       | 33.024       | 37.866          | 43.495      | 50.051      | -0.123 + (haz • 0.688) | 0.229        | 0.139    | 39.112       | 45.249       | 52.104          | 59.733      | 68.197      | -0.035 + (haz • 0.509) |
| 18.0-18.9                 | -0.128         | 0.137    | 29.090       | 33.243       | 38.078          | 43.720      | 50.324      | -0.093 + (haz • 0.717) | 0.255        | 0.139    | 40.381       | 46.752       | 53.844          | 61.708      | 70.398      | -0.037 + (haz • 0.514) |
| 19.0-19.9                 | -0.163         | 0.136    | 29.251       | 33.373       | 38.187          | 43.828      | 50.463      | -0.054 + (haz • 0.663) | 0.281        | 0.139    | 41.261       | 47.808       | 55.070          | 63.093      | 71.925      | -0.084 + (haz • 0.625) |
| <b>Black Children</b>     |                |          |              |              |                 |             |             |                        |              |          |              |              |                 |             |             |                        |
| <b>Age, y</b>             | <b>Females</b> |          |              |              |                 |             |             |                        | <b>Males</b> |          |              |              |                 |             |             |                        |
|                           | <b>L</b>       | <b>S</b> | <b>-2 SD</b> | <b>-1 SD</b> | <b>0 SD (M)</b> | <b>1 SD</b> | <b>2 SD</b> | <b>HAZ equations</b>   | <b>L</b>     | <b>S</b> | <b>-2 SD</b> | <b>-1 SD</b> | <b>0 SD (M)</b> | <b>1 SD</b> | <b>2 SD</b> | <b>HAZ equations</b>   |
| 5.0-5.9                   | -0.137         | 0.151    | 8.841        | 10.235       | 11.885          | 13.844      | 16.178      | -0.030 + (haz • 0.731) | 0.914        | 0.129    | 10.098       | 11.808       | 13.540          | 15.290      | 17.058      | -0.331 + (haz • 0.885) |
| 6.0-6.9                   | -0.093         | 0.149    | 10.753       | 12.443       | 14.429          | 16.765      | 19.522      | -0.044 + (haz • 0.762) | 0.848        | 0.133    | 11.717       | 13.750       | 15.830          | 17.952      | 20.113      | -0.207 + (haz • 0.752) |
| 7.0-7.0                   | -0.049         | 0.147    | 12.747       | 14.743       | 17.068          | 19.781      | 22.950      | -0.395 + (haz • 0.820) | 0.782        | 0.137    | 13.313       | 15.675       | 18.117          | 20.634      | 23.219      | -0.175 + (haz • 0.861) |
| 8.0-8.9                   | -0.005         | 0.145    | 14.905       | 17.220       | 19.896          | 22.990      | 26.569      | -0.527 + (haz • 0.888) | 0.716        | 0.141    | 14.958       | 17.661       | 20.487          | 23.429      | 26.480      | -0.176 + (haz • 0.772) |
| 9.0-9.9                   | 0.039          | 0.141    | 17.276       | 19.921       | 22.952          | 26.424      | 30.398      | -0.661 + (haz • 0.824) | 0.649        | 0.144    | 16.824       | 19.902       | 23.158          | 26.582      | 30.169      | -0.227 + (haz • 0.826) |
| 10.0-10.9                 | 0.083          | 0.137    | 19.836       | 22.804       | 26.173          | 29.994      | 34.320      | -0.731 + (haz • 1.043) | 0.583        | 0.147    | 19.120       | 22.635       | 26.393          | 30.389      | 34.618      | -0.355 + (haz • 0.774) |
| 11.0-11.9                 | 0.127          | 0.132    | 22.473       | 25.727       | 29.386          | 33.491      | 38.089      | -0.384 + (haz • 0.897) | 0.517        | 0.148    | 22.025       | 26.050       | 30.401          | 35.074      | 40.070      | -0.632 + (haz • 0.890) |
| 12.0-12.0                 | 0.171          | 0.126    | 25.007       | 28.491       | 32.368          | 36.673      | 41.442      | 0.014 + (haz • 0.750)  | 0.451        | 0.148    | 25.571       | 30.154       | 35.156          | 40.582      | 46.438      | -0.639 + (haz • 0.993) |
| 13.0-13.9                 | 0.215          | 0.121    | 27.263       | 30.914       | 34.939          | 39.363      | 44.216      | 0.227 + (haz • 0.606)  | 0.385        | 0.146    | 29.534       | 34.651       | 40.280          | 46.440      | 53.148      | -0.457 + (haz • 0.953) |
| 14.0-14.0                 | 0.259          | 0.116    | 29.131       | 32.898       | 37.014          | 41.500      | 46.377      | 0.213 + (haz • 0.605)  | 0.318        | 0.143    | 33.541       | 39.088       | 45.229          | 51.998      | 59.426      | -0.185 + (haz • 0.784) |
| 15.0-15.9                 | 0.303          | 0.113    | 30.586       | 34.437       | 38.613          | 43.131      | 48.004      | 0.045 + (haz • 0.525)  | 0.252        | 0.138    | 37.208       | 43.037       | 49.523          | 56.715      | 64.659      | -0.102 + (haz • 0.608) |
| 16.0-16.0                 | 0.347          | 0.110    | 31.674       | 35.596       | 39.822          | 44.363      | 49.230      | -0.119 + (haz • 0.504) | 0.186        | 0.133    | 40.261       | 46.222       | 52.883          | 60.306      | 68.555      | -0.003 + (haz • 0.541) |
| 17.0-17.9                 | 0.391          | 0.109    | 32.476       | 36.469       | 40.747          | 45.319      | 50.189      | -0.059 + (haz • 0.562) | 0.120        | 0.128    | 42.572       | 48.537       | 55.227          | 62.715      | 71.083      | 0.005 + (haz • 0.642)  |
| 18.0-18.9                 | 0.435          | 0.108    | 33.077       | 37.146       | 41.484          | 46.095      | 50.982      | -0.017 + (haz • 0.365) | 0.054        | 0.124    | 44.150       | 50.023       | 56.629          | 64.056      | 72.397      | 0.012 + (haz • 0.444)  |
| 19.0-19.9                 | 0.478          | 0.108    | 33.557       | 37.707       | 42.110          | 46.767      | 51.679      | -0.169 + (haz • 0.209) | -0.013       | 0.120    | 45.127       | 50.847       | 57.301          | 64.587      | 72.812      | -0.068 + (haz • 0.357) |

**Table S22. Appendicular Lean Soft Tissue Mass, kg**

| <b>Non-Black Children</b> |         |       |        |        |          |        |        |                        |        |       |        |        |          |        |        |                        |
|---------------------------|---------|-------|--------|--------|----------|--------|--------|------------------------|--------|-------|--------|--------|----------|--------|--------|------------------------|
| Age, y                    | Females |       |        |        |          |        |        |                        | Males  |       |        |        |          |        |        |                        |
|                           | L       | S     | -2 SD  | -1 SD  | 0 SD (M) | 1 SD   | 2 SD   | HAZ equations          | L      | S     | -2 SD  | -1 SD  | 0 SD (M) | 1 SD   | 2 SD   | HAZ equations          |
| 5.0-5.9                   | 0.610   | 0.159 | 3.587  | 4.320  | 5.104    | 5.938  | 6.821  | -0.112 + (haz • 0.977) | 0.170  | 0.139 | 4.228  | 4.882  | 5.617    | 6.442  | 7.365  | -0.126 + (haz • 0.910) |
| 6.0-6.9                   | 0.548   | 0.158 | 4.323  | 5.185  | 6.117    | 7.117  | 8.186  | -0.049 + (haz • 0.813) | 0.184  | 0.141 | 4.976  | 5.761  | 6.646    | 7.638  | 8.748  | -0.111 + (haz • 0.802) |
| 7.0-7.0                   | 0.486   | 0.157 | 5.101  | 6.094  | 7.178    | 8.354  | 9.621  | 0.012 + (haz • 0.830)  | 0.197  | 0.143 | 5.742  | 6.668  | 7.712    | 8.883  | 10.193 | -0.018 + (haz • 0.847) |
| 8.0-8.9                   | 0.425   | 0.157 | 5.961  | 7.096  | 8.346    | 9.714  | 11.203 | -0.114 + (haz • 0.834) | 0.210  | 0.146 | 6.528  | 7.606  | 8.819    | 10.181 | 11.704 | -0.012 + (haz • 0.849) |
| 9.0-9.9                   | 0.363   | 0.156 | 6.943  | 8.236  | 9.674    | 11.261 | 13.005 | -0.294 + (haz • 0.861) | 0.223  | 0.148 | 7.376  | 8.621  | 10.023   | 11.597 | 13.356 | 0.023 + (haz • 0.779)  |
| 10.0-10.9                 | 0.302   | 0.156 | 8.050  | 9.517  | 11.162   | 12.996 | 15.030 | -0.352 + (haz • 0.827) | 0.236  | 0.150 | 8.379  | 9.823  | 11.449   | 13.274 | 15.313 | -0.070 + (haz • 0.814) |
| 11.0-11.9                 | 0.240   | 0.155 | 9.219  | 10.864 | 12.724   | 14.816 | 17.160 | -0.256 + (haz • 0.933) | 0.249  | 0.152 | 9.652  | 11.344 | 13.250   | 15.386 | 17.772 | -0.253 + (haz • 0.918) |
| 12.0-12.0                 | 0.179   | 0.154 | 10.335 | 12.142 | 14.201   | 16.539 | 19.183 | -0.026 + (haz • 0.851) | 0.262  | 0.153 | 11.245 | 13.239 | 15.482   | 17.994 | 20.795 | -0.336 + (haz • 0.980) |
| 13.0-13.9                 | 0.117   | 0.154 | 11.287 | 13.221 | 15.442   | 17.986 | 20.894 | 0.091 + (haz • 0.702)  | 0.275  | 0.153 | 13.068 | 15.393 | 18.003   | 20.921 | 24.167 | -0.218 + (haz • 0.933) |
| 14.0-14.0                 | 0.055   | 0.153 | 12.017 | 14.035 | 16.372   | 19.072 | 22.189 | 0.012 + (haz • 0.659)  | 0.288  | 0.152 | 14.909 | 17.551 | 20.509   | 23.807 | 27.465 | -0.017 + (haz • 0.823) |
| 15.0-15.9                 | -0.006  | 0.153 | 12.525 | 14.589 | 16.995   | 19.801 | 23.073 | -0.017 + (haz • 0.578) | 0.301  | 0.151 | 16.536 | 19.438 | 22.678   | 26.277 | 30.258 | 0.125 + (haz • 0.605)  |
| 16.0-16.0                 | -0.068  | 0.152 | 12.849 | 14.926 | 17.366   | 20.235 | 23.617 | -0.091 + (haz • 0.607) | 0.314  | 0.149 | 17.809 | 20.895 | 24.330   | 28.133 | 32.326 | 0.038 + (haz • 0.562)  |
| 17.0-17.9                 | -0.129  | 0.152 | 13.042 | 15.111 | 17.558   | 20.463 | 23.922 | -0.132 + (haz • 0.627) | 0.327  | 0.147 | 18.720 | 21.922 | 25.474   | 29.394 | 33.700 | -0.030 + (haz • 0.498) |
| 18.0-18.9                 | -0.191  | 0.151 | 13.153 | 15.202 | 17.642   | 20.563 | 24.079 | -0.141 + (haz • 0.653) | 0.340  | 0.144 | 19.347 | 22.615 | 26.227   | 30.200 | 34.550 | -0.050 + (haz • 0.522) |
| 19.0-19.9                 | -0.252  | 0.150 | 13.219 | 15.241 | 17.666   | 20.594 | 24.157 | -0.082 + (haz • 0.659) | 0.354  | 0.142 | 19.800 | 23.101 | 26.738   | 30.727 | 35.080 | -0.113 + (haz • 0.654) |
| <b>Black Children</b>     |         |       |        |        |          |        |        |                        |        |       |        |        |          |        |        |                        |
| Age, y                    | Females |       |        |        |          |        |        |                        | Males  |       |        |        |          |        |        |                        |
|                           | L       | S     | -2 SD  | -1 SD  | 0 SD (M) | 1 SD   | 2 SD   | HAZ equations          | L      | S     | -2 SD  | -1 SD  | 0 SD (M) | 1 SD   | 2 SD   | HAZ equations          |
| 5.0-5.9                   | -0.109  | 0.149 | 4.322  | 4.998  | 5.793    | 6.732  | 7.842  | -0.350 + (haz • 0.796) | 1.063  | 0.171 | 4.206  | 5.322  | 6.425    | 7.515  | 8.595  | -0.237 + (haz • 0.801) |
| 6.0-6.9                   | -0.082  | 0.147 | 5.229  | 6.039  | 6.986    | 8.096  | 9.399  | -0.084 + (haz • 0.810) | 0.982  | 0.167 | 5.141  | 6.423  | 7.710    | 9.000  | 10.293 | -0.195 + (haz • 0.707) |
| 7.0-7.0                   | -0.055  | 0.144 | 6.194  | 7.143  | 8.247    | 9.533  | 11.031 | -0.301 + (haz • 0.864) | 0.901  | 0.164 | 6.102  | 7.535  | 8.995    | 10.480 | 11.986 | -0.154 + (haz • 0.789) |
| 8.0-8.9                   | -0.027  | 0.142 | 7.281  | 8.385  | 9.662    | 11.140 | 12.851 | -0.322 + (haz • 0.905) | 0.820  | 0.160 | 7.104  | 8.680  | 10.310   | 11.987 | 13.708 | -0.143 + (haz • 0.716) |
| 9.0-9.9                   | 0.000   | 0.140 | 8.527  | 9.806  | 11.277   | 12.969 | 14.915 | -0.495 + (haz • 0.814) | 0.738  | 0.157 | 8.222  | 9.949  | 11.760   | 13.646 | 15.603 | -0.196 + (haz • 0.824) |
| 10.0-10.9                 | 0.027   | 0.138 | 9.893  | 11.361 | 13.041   | 14.961 | 17.154 | -0.600 + (haz • 1.004) | 0.657  | 0.154 | 9.562  | 11.470 | 13.493   | 15.627 | 17.865 | -0.340 + (haz • 0.824) |
| 11.0-11.9                 | 0.055   | 0.135 | 11.265 | 12.918 | 14.799   | 16.938 | 19.366 | -0.342 + (haz • 0.851) | 0.576  | 0.151 | 11.243 | 13.377 | 15.667   | 18.108 | 20.697 | -0.624 + (haz • 0.940) |
| 12.0-12.0                 | 0.082   | 0.133 | 12.500 | 14.315 | 16.369   | 18.689 | 21.309 | -0.088 + (haz • 0.740) | 0.495  | 0.148 | 13.278 | 15.681 | 18.286   | 21.093 | 24.103 | -0.628 + (haz • 1.058) |
| 13.0-13.9                 | 0.110   | 0.131 | 13.508 | 15.447 | 17.630   | 20.083 | 22.836 | 0.061 + (haz • 0.581)  | 0.413  | 0.145 | 15.478 | 18.152 | 21.080   | 24.268 | 27.722 | -0.468 + (haz • 0.950) |
| 14.0-14.0                 | 0.137   | 0.129 | 14.268 | 16.292 | 18.561   | 21.096 | 23.925 | 0.094 + (haz • 0.528)  | 0.332  | 0.142 | 17.587 | 20.494 | 23.705   | 27.235 | 31.101 | -0.244 + (haz • 0.798) |
| 15.0-15.9                 | 0.164   | 0.127 | 14.814 | 16.892 | 19.209   | 21.785 | 24.643 | -0.047 + (haz • 0.476) | 0.251  | 0.139 | 19.402 | 22.474 | 25.896   | 29.694 | 33.895 | -0.155 + (haz • 0.633) |
| 16.0-16.0                 | 0.192   | 0.125 | 15.209 | 17.317 | 19.656   | 22.244 | 25.101 | -0.142 + (haz • 0.437) | 0.169  | 0.136 | 20.812 | 23.972 | 27.521   | 31.496 | 35.936 | -0.061 + (haz • 0.558) |
| 17.0-17.9                 | 0.219   | 0.123 | 15.507 | 17.632 | 19.977   | 22.559 | 25.395 | -0.012 + (haz • 0.463) | 0.088  | 0.134 | 21.791 | 24.968 | 28.563   | 32.624 | 37.204 | -0.038 + (haz • 0.684) |
| 18.0-18.9                 | 0.246   | 0.121 | 15.741 | 17.872 | 20.214   | 22.779 | 25.583 | 0.121 + (haz • 0.241)  | 0.007  | 0.131 | 22.370 | 25.506 | 29.079   | 33.148 | 37.782 | -0.003 + (haz • 0.472) |
| 19.0-19.9                 | 0.274   | 0.119 | 15.935 | 18.066 | 20.398   | 22.940 | 25.705 | -0.055 + (haz • 0.152) | -0.074 | 0.128 | 22.651 | 25.707 | 29.211   | 33.234 | 37.858 | -0.106 + (haz • 0.379) |

**Table S23. Leg Lean Soft Tissue Mass, kg**

| <b>Non-Black Children</b> |         |       |        |        |          |        |        |                        |        |       |        |        |          |        |        |                        |
|---------------------------|---------|-------|--------|--------|----------|--------|--------|------------------------|--------|-------|--------|--------|----------|--------|--------|------------------------|
| Age, y                    | Females |       |        |        |          |        |        |                        | Males  |       |        |        |          |        |        |                        |
|                           | L       | S     | -2 SD  | -1 SD  | 0 SD (M) | 1 SD   | 2 SD   | HAZ equations          | L      | S     | -2 SD  | -1 SD  | 0 SD (M) | 1 SD   | 2 SD   | HAZ equations          |
| 5.0-5.9                   | 0.612   | 0.165 | 2.604  | 3.161  | 3.760    | 4.398  | 5.074  | -0.123 + (haz • 0.995) | 0.148  | 0.145 | 3.030  | 3.521  | 4.078    | 4.709  | 5.421  | -0.129 + (haz • 0.907) |
| 6.0-6.9                   | 0.554   | 0.164 | 3.178  | 3.841  | 4.560    | 5.334  | 6.161  | -0.049 + (haz • 0.809) | 0.170  | 0.147 | 3.612  | 4.207  | 4.882    | 5.644  | 6.502  | -0.103 + (haz • 0.781) |
| 7.0-7.0                   | 0.496   | 0.163 | 3.784  | 4.555  | 5.397    | 6.312  | 7.299  | 0.010 + (haz • 0.844)  | 0.192  | 0.148 | 4.210  | 4.916  | 5.715    | 6.616  | 7.628  | -0.019 + (haz • 0.832) |
| 8.0-8.9                   | 0.438   | 0.162 | 4.453  | 5.338  | 6.315    | 7.384  | 8.549  | -0.103 + (haz • 0.845) | 0.214  | 0.150 | 4.827  | 5.652  | 6.583    | 7.632  | 8.807  | -0.009 + (haz • 0.830) |
| 9.0-9.9                   | 0.379   | 0.161 | 5.214  | 6.227  | 7.353    | 8.597  | 9.965  | -0.296 + (haz • 0.888) | 0.236  | 0.152 | 5.496  | 6.452  | 7.530    | 8.741  | 10.095 | 0.008 + (haz • 0.774)  |
| 10.0-10.9                 | 0.321   | 0.160 | 6.070  | 7.222  | 8.513    | 9.953  | 11.550 | -0.352 + (haz • 0.827) | 0.258  | 0.153 | 6.283  | 7.395  | 8.646    | 10.048 | 11.612 | -0.079 + (haz • 0.816) |
| 11.0-11.9                 | 0.263   | 0.159 | 6.974  | 8.268  | 9.730    | 11.374 | 13.215 | -0.252 + (haz • 0.919) | 0.280  | 0.154 | 7.264  | 8.567  | 10.030   | 11.666 | 13.485 | -0.246 + (haz • 0.923) |
| 12.0-12.0                 | 0.204   | 0.159 | 7.840  | 9.262  | 10.882   | 12.720 | 14.797 | -0.037 + (haz • 0.848) | 0.302  | 0.155 | 8.462  | 9.993  | 11.707   | 13.616 | 15.732 | -0.326 + (haz • 0.965) |
| 13.0-13.9                 | 0.146   | 0.158 | 8.582  | 10.106 | 11.854   | 13.855 | 16.137 | 0.084 + (haz • 0.707)  | 0.323  | 0.154 | 9.802  | 11.577 | 13.558   | 15.756 | 18.183 | -0.207 + (haz • 0.913) |
| 14.0-14.0                 | 0.088   | 0.157 | 9.155  | 10.746 | 12.586   | 14.709 | 17.153 | 0.016 + (haz • 0.655)  | 0.345  | 0.153 | 11.126 | 13.131 | 15.359   | 17.822 | 20.529 | -0.016 + (haz • 0.812) |
| 15.0-15.9                 | 0.029   | 0.156 | 9.557  | 11.184 | 13.078   | 15.282 | 17.845 | -0.008 + (haz • 0.568) | 0.367  | 0.151 | 12.267 | 14.458 | 16.881   | 19.546 | 22.463 | 0.130 + (haz • 0.615)  |
| 16.0-16.0                 | -0.029  | 0.155 | 9.814  | 11.451 | 13.370   | 15.621 | 18.265 | -0.079 + (haz • 0.591) | 0.389  | 0.148 | 13.130 | 15.447 | 17.998   | 20.792 | 23.835 | 0.026 + (haz • 0.587)  |
| 17.0-17.9                 | -0.087  | 0.154 | 9.966  | 11.596 | 13.519   | 15.793 | 18.490 | -0.131 + (haz • 0.620) | 0.411  | 0.146 | 13.716 | 16.107 | 18.728   | 21.584 | 24.682 | -0.036 + (haz • 0.523) |
| 18.0-18.9                 | -0.145  | 0.154 | 10.053 | 11.664 | 13.578   | 15.861 | 18.594 | -0.137 + (haz • 0.626) | 0.433  | 0.144 | 14.092 | 16.518 | 19.165   | 22.037 | 25.139 | -0.054 + (haz • 0.549) |
| 19.0-19.9                 | -0.204  | 0.153 | 10.103 | 11.691 | 13.590   | 15.873 | 18.633 | -0.078 + (haz • 0.661) | 0.455  | 0.142 | 14.344 | 16.782 | 19.430   | 22.291 | 25.367 | -0.134 + (haz • 0.684) |
| <b>Black Children</b>     |         |       |        |        |          |        |        |                        |        |       |        |        |          |        |        |                        |
| Age, y                    | Females |       |        |        |          |        |        |                        | Males  |       |        |        |          |        |        |                        |
|                           | L       | S     | -2 SD  | -1 SD  | 0 SD (M) | 1 SD   | 2 SD   | HAZ equations          | L      | S     | -2 SD  | -1 SD  | 0 SD (M) | 1 SD   | 2 SD   | HAZ equations          |
| 5.0-5.9                   | -0.034  | 0.152 | 3.189  | 3.709  | 4.318    | 5.031  | 5.866  | -0.362 + (haz • 0.794) | 1.306  | 0.169 | 3.024  | 3.900  | 4.718    | 5.495  | 6.240  | -0.181 + (haz • 0.773) |
| 6.0-6.9                   | -0.015  | 0.150 | 3.903  | 4.532  | 5.264    | 6.117  | 7.110  | -0.071 + (haz • 0.790) | 1.199  | 0.166 | 3.747  | 4.754  | 5.721    | 6.656  | 7.565  | -0.151 + (haz • 0.727) |
| 7.0-7.0                   | 0.005   | 0.148 | 4.659  | 5.401  | 6.260    | 7.255  | 8.408  | -0.302 + (haz • 0.862) | 1.091  | 0.163 | 4.507  | 5.638  | 6.750    | 7.844  | 8.925  | -0.149 + (haz • 0.794) |
| 8.0-8.9                   | 0.024   | 0.145 | 5.507  | 6.372  | 7.370    | 8.520  | 9.844  | -0.316 + (haz • 0.901) | 0.983  | 0.161 | 5.334  | 6.589  | 7.849    | 9.112  | 10.378 | -0.164 + (haz • 0.724) |
| 9.0-9.9                   | 0.043   | 0.143 | 6.472  | 7.477  | 8.629    | 9.951  | 11.464 | -0.488 + (haz • 0.788) | 0.875  | 0.158 | 6.273  | 7.662  | 9.084    | 10.535 | 12.011 | -0.299 + (haz • 0.828) |
| 10.0-10.9                 | 0.063   | 0.141 | 7.527  | 8.680  | 9.997    | 11.499 | 13.212 | -0.582 + (haz • 0.974) | 0.767  | 0.156 | 7.367  | 8.909  | 10.515   | 12.180 | 13.900 | -0.488 + (haz • 0.835) |
| 11.0-11.9                 | 0.082   | 0.138 | 8.582  | 9.879  | 11.355   | 13.030 | 14.930 | -0.323 + (haz • 0.824) | 0.659  | 0.153 | 8.634  | 10.345 | 12.157   | 14.067 | 16.070 | -0.727 + (haz • 0.934) |
| 12.0-12.0                 | 0.102   | 0.136 | 9.530  | 10.953 | 12.563   | 14.383 | 16.436 | -0.097 + (haz • 0.728) | 0.552  | 0.151 | 10.035 | 11.922 | 13.954   | 16.128 | 18.442 | -0.631 + (haz • 1.021) |
| 13.0-13.9                 | 0.121   | 0.134 | 10.304 | 11.822 | 13.532   | 15.457 | 17.618 | 0.063 + (haz • 0.545)  | 0.444  | 0.148 | 11.473 | 13.526 | 15.769   | 18.204 | 20.836 | -0.389 + (haz • 0.908) |
| 14.0-14.0                 | 0.140   | 0.132 | 10.887 | 12.470 | 14.246   | 16.235 | 18.459 | 0.093 + (haz • 0.501)  | 0.336  | 0.146 | 12.830 | 15.020 | 17.445   | 20.116 | 23.046 | -0.126 + (haz • 0.762) |
| 15.0-15.9                 | 0.160   | 0.130 | 11.305 | 12.926 | 14.738   | 16.759 | 19.007 | -0.038 + (haz • 0.454) | 0.228  | 0.144 | 14.009 | 16.294 | 18.856   | 21.718 | 24.905 | -0.031 + (haz • 0.634) |
| 16.0-16.0                 | 0.179   | 0.128 | 11.603 | 13.244 | 15.072   | 17.101 | 19.349 | -0.145 + (haz • 0.409) | 0.120  | 0.141 | 14.952 | 17.286 | 19.934   | 22.933 | 26.323 | 0.061 + (haz • 0.551)  |
| 17.0-17.9                 | 0.198   | 0.126 | 11.824 | 13.474 | 15.303   | 17.327 | 19.560 | -0.003 + (haz • 0.445) | 0.012  | 0.139 | 15.647 | 17.988 | 20.675   | 23.757 | 27.293 | 0.035 + (haz • 0.689)  |
| 18.0-18.9                 | 0.218   | 0.124 | 11.992 | 13.643 | 15.466   | 17.475 | 19.681 | 0.142 + (haz • 0.209)  | -0.095 | 0.137 | 16.122 | 18.439 | 21.124   | 24.245 | 27.877 | 0.036 + (haz • 0.455)  |
| 19.0-19.9                 | 0.237   | 0.122 | 12.127 | 13.773 | 15.584   | 17.572 | 19.747 | -0.057 + (haz • 0.140) | -0.203 | 0.135 | 16.436 | 18.706 | 21.364   | 24.490 | 28.183 | -0.182 + (haz • 0.386) |

**Table S24. Fat Mass, kg**

**Non-Black Children**

| Age, y    | Females |       |        |        |          |        |        |                        | Males  |       |       |       |          |        |        |                         |
|-----------|---------|-------|--------|--------|----------|--------|--------|------------------------|--------|-------|-------|-------|----------|--------|--------|-------------------------|
|           | L       | S     | -2 SD  | -1 SD  | 0 SD (M) | 1 SD   | 2 SD   | HAZ equations          | L      | S     | -2 SD | -1 SD | 0 SD (M) | 1 SD   | 2 SD   | HAZ equations           |
| 5.0-5.9   | -0.207  | 0.247 | 3.160  | 3.975  | 5.058    | 6.517  | 8.517  | 0.144 + (haz • 0.233)  | -0.195 | 0.250 | 2.694 | 3.402 | 4.344    | 5.615  | 7.357  | 0.142 + (haz • 0.375)   |
| 6.0-6.9   | -0.214  | 0.272 | 3.499  | 4.491  | 5.848    | 7.736  | 10.417 | -0.130 + (haz • 0.436) | -0.223 | 0.280 | 2.830 | 3.655 | 4.796    | 6.404  | 8.722  | -0.116 + (haz • 0.399)  |
| 7.0-7.0   | -0.221  | 0.297 | 3.832  | 5.023  | 6.697    | 9.105  | 12.659 | -0.047 + (haz • 0.514) | -0.251 | 0.312 | 3.018 | 3.989 | 5.385    | 7.449  | 10.604 | -0.134 + (haz • 0.427)  |
| 8.0-8.9   | -0.228  | 0.321 | 4.189  | 5.595  | 7.628    | 10.647 | 15.274 | -0.065 + (haz • 0.554) | -0.278 | 0.343 | 3.273 | 4.419 | 6.132    | 8.795  | 13.131 | -0.105 + (haz • 0.429)  |
| 9.0-9.9   | -0.235  | 0.341 | 4.590  | 6.225  | 8.642    | 12.331 | 18.174 | -0.065 + (haz • 0.497) | -0.306 | 0.371 | 3.568 | 4.900 | 6.965    | 10.329 | 16.170 | 0.046 + (haz • 0.374)   |
| 10.0-10.9 | -0.242  | 0.354 | 5.056  | 6.922  | 9.725    | 14.084 | 21.154 | -0.063 + (haz • 0.393) | -0.334 | 0.393 | 3.864 | 5.368 | 7.768    | 11.842 | 19.348 | 0.035 + (haz • 0.465)   |
| 11.0-11.9 | -0.248  | 0.359 | 5.606  | 7.696  | 10.856   | 15.814 | 23.948 | -0.150 + (haz • 0.434) | -0.362 | 0.408 | 4.135 | 5.776 | 8.449    | 13.135 | 22.211 | 0.058 + (haz • 0.425)   |
| 12.0-12.0 | -0.255  | 0.356 | 6.248  | 8.547  | 12.015   | 17.448 | 26.353 | -0.152 + (haz • 0.412) | -0.390 | 0.415 | 4.373 | 6.108 | 8.970    | 14.099 | 24.421 | 0.003 + (haz • 0.272)   |
| 13.0-13.9 | -0.262  | 0.347 | 6.964  | 9.451  | 13.172   | 18.949 | 28.326 | -0.063 + (haz • 0.317) | -0.418 | 0.415 | 4.588 | 6.381 | 9.355    | 14.757 | 25.924 | -0.025 + (haz • 0.145)  |
| 14.0-14.0 | -0.269  | 0.336 | 7.701  | 10.354 | 14.282   | 20.311 | 29.970 | 0.074 + (haz • 0.163)  | -0.446 | 0.411 | 4.800 | 6.630 | 9.670    | 15.228 | 26.926 | -0.010 + (haz • 0.046)  |
| 15.0-15.9 | -0.276  | 0.327 | 8.392  | 11.192 | 15.303   | 21.552 | 31.458 | 0.093 + (haz • 0.108)  | -0.474 | 0.405 | 5.031 | 6.894 | 9.985    | 15.651 | 27.725 | -0.058 + (haz • 0.039)  |
| 16.0-16.0 | -0.283  | 0.321 | 8.982  | 11.920 | 16.213   | 22.709 | 32.959 | 0.080 + (haz • 0.108)  | -0.502 | 0.398 | 5.301 | 7.205 | 10.358   | 16.147 | 28.614 | -0.093 + (haz • 0.021)  |
| 17.0-17.9 | -0.290  | 0.321 | 9.451  | 12.525 | 17.018   | 23.825 | 34.591 | -0.085 + (haz • 0.190) | -0.529 | 0.392 | 5.611 | 7.572 | 10.815   | 16.788 | 29.812 | -0.073 + (haz • -0.012) |
| 18.0-18.9 | -0.297  | 0.324 | 9.814  | 13.023 | 17.737   | 24.922 | 36.381 | -0.026 + (haz • 0.140) | -0.557 | 0.388 | 5.950 | 7.982 | 11.345   | 17.574 | 31.393 | 0.055 + (haz • -0.078)  |
| 19.0-19.9 | -0.304  | 0.329 | 10.098 | 13.443 | 18.390   | 26.001 | 38.290 | 0.086 + (haz • 0.208)  | -0.585 | 0.386 | 6.298 | 8.409 | 11.912   | 18.455 | 33.295 | 0.067 + (haz • 0.055)   |

**Black Children**

| Age, y    | Females |       |       |        |          |        |        |                        | Males  |       |       |       |          |        |        |                        |
|-----------|---------|-------|-------|--------|----------|--------|--------|------------------------|--------|-------|-------|-------|----------|--------|--------|------------------------|
|           | L       | S     | -2 SD | -1 SD  | 0 SD (M) | 1 SD   | 2 SD   | HAZ equations          | L      | S     | -2 SD | -1 SD | 0 SD (M) | 1 SD   | 2 SD   | HAZ equations          |
| 5.0-5.9   | 0.072   | 0.306 | 2.608 | 3.580  | 4.879    | 6.605  | 8.885  | 0.040 + (haz • 0.708)  | -0.466 | 0.268 | 2.365 | 2.964 | 3.814    | 5.077  | 7.063  | -0.151 + (haz • 0.686) |
| 6.0-6.9   | 0.051   | 0.325 | 2.890 | 4.033  | 5.597    | 7.724  | 10.606 | -0.232 + (haz • 0.552) | -0.477 | 0.303 | 2.573 | 3.301 | 4.382    | 6.078  | 8.959  | -0.323 + (haz • 0.490) |
| 7.0-7.0   | 0.031   | 0.343 | 3.206 | 4.545  | 6.420    | 9.035  | 12.669 | -0.254 + (haz • 0.544) | -0.487 | 0.340 | 2.762 | 3.629 | 4.972    | 7.215  | 11.373 | -0.227 + (haz • 0.497) |
| 8.0-8.9   | 0.010   | 0.360 | 3.588 | 5.151  | 7.385    | 10.574 | 15.119 | -0.170 + (haz • 0.463) | -0.498 | 0.377 | 2.945 | 3.955 | 5.588    | 8.487  | 14.394 | -0.219 + (haz • 0.645) |
| 9.0-9.9   | -0.010  | 0.371 | 4.056 | 5.864  | 8.490    | 12.307 | 17.865 | -0.128 + (haz • 0.281) | -0.508 | 0.410 | 3.129 | 4.279 | 6.208    | 9.828  | 17.918 | -0.143 + (haz • 0.566) |
| 10.0-10.9 | -0.030  | 0.375 | 4.621 | 6.681  | 9.701    | 14.146 | 20.718 | -0.245 + (haz • 0.413) | -0.519 | 0.434 | 3.319 | 4.596 | 6.799    | 11.124 | 21.585 | -0.044 + (haz • 0.553) |
| 11.0-11.9 | -0.051  | 0.372 | 5.285 | 7.592  | 10.980   | 15.992 | 23.462 | -0.078 + (haz • 0.176) | -0.530 | 0.449 | 3.520 | 4.904 | 7.335    | 12.244 | 24.793 | -0.198 + (haz • 0.519) |
| 12.0-12.0 | -0.071  | 0.364 | 6.039 | 8.575  | 12.285   | 17.768 | 25.955 | -0.160 + (haz • 0.160) | -0.540 | 0.452 | 3.738 | 5.207 | 7.801    | 13.094 | 26.947 | -0.151 + (haz • 0.336) |
| 13.0-13.9 | -0.091  | 0.354 | 6.831 | 9.576  | 13.568   | 19.446 | 28.213 | 0.031 + (haz • 0.008)  | -0.551 | 0.446 | 3.970 | 5.503 | 8.196    | 13.667 | 27.925 | -0.051 + (haz • 0.232) |
| 14.0-14.0 | -0.112  | 0.347 | 7.575 | 10.512 | 14.772   | 21.039 | 30.403 | 0.121 + (haz • -0.017) | -0.562 | 0.435 | 4.197 | 5.777 | 8.528    | 14.049 | 28.186 | -0.047 + (haz • 0.134) |
| 15.0-15.9 | -0.132  | 0.345 | 8.187 | 11.313 | 15.858   | 22.584 | 32.723 | 0.060 + (haz • -0.182) | -0.572 | 0.426 | 4.399 | 6.016 | 8.810    | 14.363 | 28.377 | -0.178 + (haz • 0.152) |
| 16.0-16.0 | -0.152  | 0.351 | 8.625 | 11.940 | 16.814   | 24.126 | 35.354 | 0.019 + (haz • -0.184) | -0.583 | 0.421 | 4.565 | 6.215 | 9.058    | 14.687 | 28.855 | -0.046 + (haz • 0.138) |
| 17.0-17.9 | -0.173  | 0.364 | 8.889 | 12.397 | 17.644   | 25.694 | 38.406 | 0.110 + (haz • -0.331) | -0.593 | 0.420 | 4.696 | 6.379 | 9.278    | 15.033 | 29.637 | -0.025 + (haz • 0.211) |
| 18.0-18.9 | -0.193  | 0.381 | 9.015 | 12.711 | 18.366   | 27.296 | 41.920 | 0.142 + (haz • -0.452) | -0.604 | 0.420 | 4.800 | 6.513 | 9.472    | 15.381 | 30.617 | 0.215 + (haz • -0.140) |
| 19.0-19.9 | -0.213  | 0.402 | 9.045 | 12.920 | 19.007   | 28.949 | 45.962 | 0.025 + (haz • -0.121) | -0.615 | 0.422 | 4.882 | 6.623 | 9.642    | 15.724 | 31.749 | 0.088 + (haz • -0.148) |







| Age, y | Females |       |       |       |          |       |       | Males |       |       |       |          |       |        |
|--------|---------|-------|-------|-------|----------|-------|-------|-------|-------|-------|-------|----------|-------|--------|
|        | L       | S     | -2 SD | -1 SD | 0 SD (M) | 1 SD  | 2 SD  | L     | S     | -2 SD | -1 SD | 0 SD (M) | 1 SD  | 2 SD   |
| 18.7   | -0.669  | 0.125 | 5.191 | 5.800 | 6.539    | 7.450 | 8.593 | 0.106 | 0.123 | 6.531 | 7.404 | 8.381    | 9.471 | 10.686 |
| 18.8   | -0.685  | 0.125 | 5.193 | 5.802 | 6.541    | 7.453 | 8.603 | 0.103 | 0.123 | 6.538 | 7.413 | 8.392    | 9.485 | 10.705 |
| 18.9   | -0.701  | 0.125 | 5.196 | 5.803 | 6.542    | 7.457 | 8.612 | 0.100 | 0.123 | 6.545 | 7.422 | 8.403    | 9.500 | 10.723 |
| 19.0   | -0.717  | 0.125 | 5.198 | 5.804 | 6.543    | 7.460 | 8.622 | 0.097 | 0.124 | 6.551 | 7.430 | 8.414    | 9.514 | 10.742 |
| 19.1   | -0.733  | 0.125 | 5.200 | 5.806 | 6.545    | 7.463 | 8.631 | 0.095 | 0.124 | 6.558 | 7.439 | 8.425    | 9.528 | 10.760 |
| 19.2   | -0.749  | 0.125 | 5.202 | 5.807 | 6.546    | 7.467 | 8.640 | 0.092 | 0.124 | 6.564 | 7.447 | 8.435    | 9.542 | 10.778 |
| 19.3   | -0.765  | 0.125 | 5.204 | 5.808 | 6.547    | 7.470 | 8.650 | 0.089 | 0.124 | 6.571 | 7.455 | 8.446    | 9.555 | 10.796 |
| 19.4   | -0.781  | 0.126 | 5.206 | 5.809 | 6.548    | 7.473 | 8.659 | 0.086 | 0.124 | 6.577 | 7.463 | 8.456    | 9.569 | 10.814 |
| 19.5   | -0.797  | 0.126 | 5.208 | 5.810 | 6.549    | 7.476 | 8.669 | 0.083 | 0.124 | 6.583 | 7.471 | 8.466    | 9.583 | 10.832 |
| 19.6   | -0.813  | 0.126 | 5.210 | 5.811 | 6.550    | 7.479 | 8.678 | 0.081 | 0.125 | 6.589 | 7.478 | 8.477    | 9.596 | 10.850 |
| 19.7   | -0.829  | 0.126 | 5.212 | 5.812 | 6.551    | 7.482 | 8.688 | 0.078 | 0.125 | 6.595 | 7.486 | 8.487    | 9.609 | 10.867 |
| 19.8   | -0.845  | 0.126 | 5.214 | 5.813 | 6.552    | 7.485 | 8.697 | 0.075 | 0.125 | 6.601 | 7.494 | 8.497    | 9.623 | 10.885 |
| 19.9   | -0.861  | 0.126 | 5.216 | 5.814 | 6.553    | 7.488 | 8.707 | 0.072 | 0.125 | 6.607 | 7.502 | 8.507    | 9.636 | 10.903 |
| 20.0   | -0.877  | 0.126 | 5.218 | 5.815 | 6.554    | 7.491 | 8.717 | 0.070 | 0.125 | 6.613 | 7.509 | 8.517    | 9.649 | 10.921 |

**Black Children**

| Age, y | Females |       |       |       |          |       |       | Males |       |       |       |          |       |       |
|--------|---------|-------|-------|-------|----------|-------|-------|-------|-------|-------|-------|----------|-------|-------|
|        | L       | S     | -2 SD | -1 SD | 0 SD (M) | 1 SD  | 2 SD  | L     | S     | -2 SD | -1 SD | 0 SD (M) | 1 SD  | 2 SD  |
| 5.0    | -0.491  | 0.089 | 3.717 | 4.041 | 4.411    | 4.832 | 5.317 | 1.439 | 0.114 | 3.651 | 4.250 | 4.814    | 5.351 | 5.865 |
| 5.1    | -0.488  | 0.090 | 3.742 | 4.069 | 4.442    | 4.868 | 5.357 | 1.413 | 0.114 | 3.680 | 4.279 | 4.846    | 5.386 | 5.905 |
| 5.2    | -0.485  | 0.090 | 3.767 | 4.097 | 4.474    | 4.903 | 5.397 | 1.388 | 0.114 | 3.708 | 4.308 | 4.877    | 5.422 | 5.946 |
| 5.3    | -0.483  | 0.090 | 3.792 | 4.125 | 4.505    | 4.939 | 5.437 | 1.362 | 0.114 | 3.737 | 4.337 | 4.909    | 5.457 | 5.986 |
| 5.4    | -0.480  | 0.090 | 3.816 | 4.153 | 4.537    | 4.974 | 5.477 | 1.336 | 0.114 | 3.765 | 4.366 | 4.940    | 5.492 | 6.027 |
| 5.5    | -0.477  | 0.090 | 3.841 | 4.181 | 4.568    | 5.010 | 5.518 | 1.311 | 0.114 | 3.794 | 4.395 | 4.971    | 5.528 | 6.067 |
| 5.6    | -0.474  | 0.091 | 3.866 | 4.209 | 4.599    | 5.045 | 5.558 | 1.285 | 0.114 | 3.822 | 4.424 | 5.003    | 5.563 | 6.108 |
| 5.7    | -0.471  | 0.091 | 3.891 | 4.237 | 4.631    | 5.081 | 5.598 | 1.260 | 0.114 | 3.851 | 4.453 | 5.034    | 5.598 | 6.148 |
| 5.8    | -0.469  | 0.091 | 3.916 | 4.265 | 4.662    | 5.116 | 5.638 | 1.234 | 0.114 | 3.879 | 4.481 | 5.065    | 5.634 | 6.189 |
| 5.9    | -0.466  | 0.091 | 3.941 | 4.293 | 4.694    | 5.152 | 5.679 | 1.208 | 0.114 | 3.908 | 4.510 | 5.096    | 5.669 | 6.229 |
| 6.0    | -0.463  | 0.091 | 3.965 | 4.321 | 4.725    | 5.188 | 5.719 | 1.183 | 0.114 | 3.936 | 4.539 | 5.128    | 5.704 | 6.270 |
| 6.1    | -0.460  | 0.092 | 3.990 | 4.349 | 4.757    | 5.223 | 5.759 | 1.157 | 0.113 | 3.964 | 4.568 | 5.159    | 5.739 | 6.311 |
| 6.2    | -0.458  | 0.092 | 4.015 | 4.377 | 4.788    | 5.259 | 5.800 | 1.132 | 0.113 | 3.993 | 4.596 | 5.190    | 5.774 | 6.351 |
| 6.3    | -0.455  | 0.092 | 4.040 | 4.405 | 4.820    | 5.294 | 5.840 | 1.106 | 0.113 | 4.021 | 4.625 | 5.221    | 5.809 | 6.392 |
| 6.4    | -0.452  | 0.092 | 4.064 | 4.433 | 4.851    | 5.330 | 5.881 | 1.080 | 0.113 | 4.049 | 4.654 | 5.252    | 5.844 | 6.432 |
| 6.5    | -0.449  | 0.092 | 4.089 | 4.460 | 4.883    | 5.366 | 5.921 | 1.055 | 0.113 | 4.078 | 4.682 | 5.283    | 5.879 | 6.472 |
| 6.6    | -0.446  | 0.093 | 4.114 | 4.488 | 4.914    | 5.402 | 5.962 | 1.029 | 0.113 | 4.106 | 4.711 | 5.313    | 5.914 | 6.513 |
| 6.7    | -0.444  | 0.093 | 4.138 | 4.516 | 4.946    | 5.437 | 6.002 | 1.003 | 0.113 | 4.134 | 4.739 | 5.344    | 5.949 | 6.553 |
| 6.8    | -0.441  | 0.093 | 4.163 | 4.544 | 4.977    | 5.473 | 6.043 | 0.978 | 0.113 | 4.162 | 4.767 | 5.375    | 5.983 | 6.593 |
| 6.9    | -0.438  | 0.093 | 4.187 | 4.572 | 5.009    | 5.509 | 6.084 | 0.952 | 0.113 | 4.190 | 4.796 | 5.405    | 6.018 | 6.633 |
| 7.0    | -0.435  | 0.093 | 4.212 | 4.600 | 5.041    | 5.545 | 6.125 | 0.927 | 0.113 | 4.218 | 4.824 | 5.435    | 6.052 | 6.673 |
| 7.1    | -0.432  | 0.094 | 4.237 | 4.628 | 5.072    | 5.581 | 6.166 | 0.901 | 0.113 | 4.246 | 4.852 | 5.466    | 6.086 | 6.713 |
| 7.2    | -0.430  | 0.094 | 4.261 | 4.655 | 5.104    | 5.617 | 6.207 | 0.875 | 0.113 | 4.274 | 4.880 | 5.496    | 6.121 | 6.753 |
| 7.3    | -0.427  | 0.094 | 4.286 | 4.683 | 5.136    | 5.653 | 6.248 | 0.850 | 0.113 | 4.301 | 4.908 | 5.526    | 6.155 | 6.793 |
| 7.4    | -0.424  | 0.094 | 4.311 | 4.711 | 5.167    | 5.689 | 6.289 | 0.824 | 0.113 | 4.329 | 4.936 | 5.556    | 6.189 | 6.833 |
| 7.5    | -0.421  | 0.094 | 4.335 | 4.739 | 5.199    | 5.725 | 6.330 | 0.799 | 0.113 | 4.357 | 4.964 | 5.586    | 6.223 | 6.873 |
| 7.6    | -0.419  | 0.095 | 4.360 | 4.767 | 5.231    | 5.762 | 6.372 | 0.773 | 0.113 | 4.384 | 4.991 | 5.616    | 6.257 | 6.913 |
| 7.7    | -0.416  | 0.095 | 4.385 | 4.796 | 5.263    | 5.798 | 6.413 | 0.747 | 0.113 | 4.412 | 5.019 | 5.646    | 6.290 | 6.952 |
| 7.8    | -0.413  | 0.095 | 4.409 | 4.824 | 5.295    | 5.835 | 6.455 | 0.722 | 0.113 | 4.439 | 5.047 | 5.676    | 6.324 | 6.992 |
| 7.9    | -0.410  | 0.095 | 4.434 | 4.852 | 5.327    | 5.871 | 6.497 | 0.696 | 0.113 | 4.467 | 5.075 | 5.705    | 6.358 | 7.032 |
| 8.0    | -0.407  | 0.096 | 4.459 | 4.880 | 5.360    | 5.908 | 6.539 | 0.671 | 0.112 | 4.494 | 5.102 | 5.735    | 6.392 | 7.071 |
| 8.1    | -0.405  | 0.096 | 4.484 | 4.908 | 5.392    | 5.945 | 6.581 | 0.645 | 0.112 | 4.522 | 5.130 | 5.765    | 6.425 | 7.111 |
| 8.2    | -0.402  | 0.096 | 4.509 | 4.937 | 5.424    | 5.982 | 6.623 | 0.619 | 0.112 | 4.549 | 5.157 | 5.794    | 6.459 | 7.151 |
| 8.3    | -0.399  | 0.096 | 4.534 | 4.965 | 5.456    | 6.019 | 6.665 | 0.594 | 0.112 | 4.577 | 5.185 | 5.824    | 6.493 | 7.191 |
| 8.4    | -0.396  | 0.096 | 4.559 | 4.994 | 5.489    | 6.056 | 6.707 | 0.568 | 0.112 | 4.604 | 5.213 | 5.854    | 6.527 | 7.231 |
| 8.5    | -0.394  | 0.097 | 4.583 | 5.022 | 5.521    | 6.093 | 6.750 | 0.543 | 0.112 | 4.632 | 5.241 | 5.884    | 6.561 | 7.271 |
| 8.6    | -0.391  | 0.097 | 4.608 | 5.050 | 5.554    | 6.130 | 6.792 | 0.517 | 0.112 | 4.659 | 5.268 | 5.914    | 6.595 | 7.311 |
| 8.7    | -0.388  | 0.097 | 4.633 | 5.079 | 5.586    | 6.167 | 6.835 | 0.491 | 0.112 | 4.687 | 5.296 | 5.944    | 6.629 | 7.352 |
| 8.8    | -0.385  | 0.097 | 4.658 | 5.108 | 5.619    | 6.204 | 6.878 | 0.466 | 0.112 | 4.715 | 5.324 | 5.974    | 6.663 | 7.392 |
| 8.9    | -0.382  | 0.097 | 4.683 | 5.136 | 5.652    | 6.242 | 6.921 | 0.440 | 0.112 | 4.743 | 5.353 | 6.004    | 6.697 | 7.433 |
| 9.0    | -0.380  | 0.098 | 4.708 | 5.165 | 5.684    | 6.279 | 6.964 | 0.414 | 0.112 | 4.771 | 5.381 | 6.034    | 6.732 | 7.475 |
| 9.1    | -0.377  | 0.098 | 4.733 | 5.193 | 5.717    | 6.317 | 7.006 | 0.389 | 0.112 | 4.799 | 5.409 | 6.065    | 6.767 | 7.516 |
| 9.2    | -0.374  | 0.098 | 4.758 | 5.222 | 5.750    | 6.354 | 7.049 | 0.363 | 0.112 | 4.828 | 5.438 | 6.096    | 6.802 | 7.558 |
| 9.3    | -0.371  | 0.098 | 4.783 | 5.250 | 5.782    | 6.392 | 7.093 | 0.338 | 0.112 | 4.856 | 5.467 | 6.127    | 6.837 | 7.600 |
| 9.4    | -0.369  | 0.099 | 4.808 | 5.279 | 5.815    | 6.429 | 7.136 | 0.312 | 0.112 | 4.885 | 5.496 | 6.158    | 6.872 | 7.642 |
| 9.5    | -0.366  | 0.099 | 4.832 | 5.307 | 5.848    | 6.467 | 7.179 | 0.286 | 0.112 | 4.914 | 5.525 | 6.189    | 6.908 | 7.685 |
| 9.6    | -0.363  | 0.099 | 4.857 | 5.335 | 5.880    | 6.504 | 7.222 | 0.261 | 0.112 | 4.943 | 5.555 | 6.221    | 6.944 | 7.728 |
| 9.7    | -0.360  | 0.099 | 4.882 | 5.364 | 5.913    | 6.542 | 7.265 | 0.235 | 0.112 | 4.973 | 5.585 | 6.253    | 6.981 | 7.772 |
| 9.8    | -0.357  | 0.099 | 4.906 | 5.392 | 5.946    | 6.579 | 7.308 | 0.210 | 0.111 | 5.002 | 5.615 | 6.286    | 7.018 | 7.816 |
| 9.9    | -0.355  | 0.100 | 4.931 | 5.420 | 5.978    | 6.616 | 7.351 | 0.184 | 0.111 | 5.032 | 5.646 | 6.318    | 7.055 | 7.861 |
| 10.0   | -0.352  | 0.100 | 4.955 | 5.448 | 6.010    | 6.654 | 7.394 | 0.158 | 0.111 | 5.063 | 5.676 | 6.351    | 7.093 | 7.906 |
| 10.1   | -0.349  | 0.100 | 4.979 | 5.476 | 6.043    | 6.691 | 7.436 | 0.133 | 0.111 | 5.093 | 5.707 | 6.385    | 7.131 | 7.951 |
| 10.2   | -0.346  | 0.100 | 5.003 | 5.504 | 6.075    | 6.728 | 7.479 | 0.107 | 0.111 | 5.124 | 5.739 | 6.419    | 7.169 | 7.997 |

| Age, y | Females |       |       |       |          |       |       | Males  |       |       |       |          |        |        |
|--------|---------|-------|-------|-------|----------|-------|-------|--------|-------|-------|-------|----------|--------|--------|
|        | L       | S     | -2 SD | -1 SD | 0 SD (M) | 1 SD  | 2 SD  | L      | S     | -2 SD | -1 SD | 0 SD (M) | 1 SD   | 2 SD   |
| 10.3   | -0.343  | 0.101 | 5.027 | 5.532 | 6.107    | 6.765 | 7.522 | 0.082  | 0.111 | 5.155 | 5.771 | 6.453    | 7.208  | 8.044  |
| 10.4   | -0.341  | 0.101 | 5.051 | 5.559 | 6.138    | 6.801 | 7.564 | 0.056  | 0.111 | 5.187 | 5.803 | 6.488    | 7.248  | 8.092  |
| 10.5   | -0.338  | 0.101 | 5.075 | 5.587 | 6.170    | 6.838 | 7.606 | 0.030  | 0.111 | 5.219 | 5.836 | 6.523    | 7.288  | 8.140  |
| 10.6   | -0.335  | 0.101 | 5.098 | 5.614 | 6.202    | 6.874 | 7.648 | 0.005  | 0.111 | 5.251 | 5.869 | 6.558    | 7.328  | 8.188  |
| 10.7   | -0.332  | 0.101 | 5.122 | 5.641 | 6.233    | 6.911 | 7.690 | -0.021 | 0.111 | 5.284 | 5.902 | 6.594    | 7.369  | 8.238  |
| 10.8   | -0.330  | 0.102 | 5.145 | 5.668 | 6.264    | 6.946 | 7.732 | -0.047 | 0.111 | 5.317 | 5.936 | 6.631    | 7.411  | 8.288  |
| 10.9   | -0.327  | 0.102 | 5.167 | 5.694 | 6.295    | 6.982 | 7.773 | -0.072 | 0.111 | 5.351 | 5.971 | 6.668    | 7.453  | 8.338  |
| 11.0   | -0.324  | 0.102 | 5.190 | 5.720 | 6.325    | 7.017 | 7.814 | -0.098 | 0.111 | 5.385 | 6.005 | 6.705    | 7.496  | 8.390  |
| 11.1   | -0.321  | 0.102 | 5.212 | 5.746 | 6.355    | 7.053 | 7.855 | -0.123 | 0.111 | 5.419 | 6.041 | 6.743    | 7.539  | 8.442  |
| 11.2   | -0.318  | 0.103 | 5.234 | 5.772 | 6.385    | 7.087 | 7.895 | -0.149 | 0.111 | 5.454 | 6.076 | 6.782    | 7.583  | 8.494  |
| 11.3   | -0.316  | 0.103 | 5.256 | 5.797 | 6.415    | 7.122 | 7.935 | -0.175 | 0.111 | 5.489 | 6.112 | 6.820    | 7.627  | 8.548  |
| 11.4   | -0.313  | 0.103 | 5.277 | 5.823 | 6.444    | 7.156 | 7.974 | -0.200 | 0.111 | 5.524 | 6.149 | 6.860    | 7.672  | 8.602  |
| 11.5   | -0.310  | 0.103 | 5.298 | 5.847 | 6.473    | 7.190 | 8.014 | -0.226 | 0.111 | 5.560 | 6.186 | 6.900    | 7.717  | 8.656  |
| 11.6   | -0.307  | 0.104 | 5.319 | 5.872 | 6.502    | 7.223 | 8.053 | -0.251 | 0.111 | 5.597 | 6.223 | 6.940    | 7.763  | 8.712  |
| 11.7   | -0.305  | 0.104 | 5.340 | 5.896 | 6.530    | 7.256 | 8.091 | -0.277 | 0.110 | 5.633 | 6.261 | 6.981    | 7.809  | 8.768  |
| 11.8   | -0.302  | 0.104 | 5.360 | 5.919 | 6.558    | 7.288 | 8.129 | -0.303 | 0.110 | 5.670 | 6.299 | 7.022    | 7.856  | 8.825  |
| 11.9   | -0.299  | 0.104 | 5.379 | 5.943 | 6.585    | 7.321 | 8.166 | -0.328 | 0.110 | 5.708 | 6.338 | 7.063    | 7.904  | 8.882  |
| 12.0   | -0.296  | 0.104 | 5.399 | 5.966 | 6.612    | 7.352 | 8.203 | -0.354 | 0.110 | 5.745 | 6.377 | 7.105    | 7.951  | 8.940  |
| 12.1   | -0.293  | 0.105 | 5.418 | 5.988 | 6.639    | 7.383 | 8.240 | -0.379 | 0.110 | 5.783 | 6.416 | 7.147    | 7.999  | 8.998  |
| 12.2   | -0.291  | 0.105 | 5.436 | 6.010 | 6.665    | 7.414 | 8.276 | -0.405 | 0.110 | 5.822 | 6.455 | 7.190    | 8.048  | 9.057  |
| 12.3   | -0.288  | 0.105 | 5.455 | 6.032 | 6.690    | 7.444 | 8.311 | -0.431 | 0.110 | 5.860 | 6.495 | 7.233    | 8.096  | 9.116  |
| 12.4   | -0.285  | 0.105 | 5.472 | 6.053 | 6.716    | 7.474 | 8.346 | -0.456 | 0.110 | 5.899 | 6.535 | 7.276    | 8.145  | 9.176  |
| 12.5   | -0.282  | 0.106 | 5.490 | 6.074 | 6.740    | 7.503 | 8.381 | -0.482 | 0.110 | 5.937 | 6.575 | 7.319    | 8.195  | 9.236  |
| 12.6   | -0.279  | 0.106 | 5.507 | 6.095 | 6.765    | 7.532 | 8.415 | -0.508 | 0.110 | 5.976 | 6.615 | 7.362    | 8.244  | 9.296  |
| 12.7   | -0.277  | 0.106 | 5.524 | 6.115 | 6.789    | 7.561 | 8.448 | -0.533 | 0.110 | 6.015 | 6.655 | 7.405    | 8.294  | 9.356  |
| 12.8   | -0.274  | 0.106 | 5.540 | 6.134 | 6.812    | 7.588 | 8.481 | -0.559 | 0.110 | 6.055 | 6.696 | 7.449    | 8.343  | 9.417  |
| 12.9   | -0.271  | 0.107 | 5.556 | 6.153 | 6.835    | 7.616 | 8.513 | -0.584 | 0.110 | 6.094 | 6.736 | 7.493    | 8.393  | 9.478  |
| 13.0   | -0.268  | 0.107 | 5.571 | 6.172 | 6.858    | 7.643 | 8.545 | -0.610 | 0.110 | 6.133 | 6.777 | 7.536    | 8.443  | 9.539  |
| 13.1   | -0.266  | 0.107 | 5.586 | 6.190 | 6.880    | 7.669 | 8.576 | -0.636 | 0.110 | 6.172 | 6.817 | 7.580    | 8.493  | 9.600  |
| 13.2   | -0.263  | 0.107 | 5.601 | 6.208 | 6.901    | 7.695 | 8.607 | -0.661 | 0.110 | 6.211 | 6.857 | 7.623    | 8.542  | 9.662  |
| 13.3   | -0.260  | 0.108 | 5.615 | 6.225 | 6.922    | 7.720 | 8.637 | -0.687 | 0.110 | 6.251 | 6.898 | 7.667    | 8.592  | 9.723  |
| 13.4   | -0.257  | 0.108 | 5.629 | 6.242 | 6.943    | 7.745 | 8.667 | -0.712 | 0.110 | 6.290 | 6.938 | 7.710    | 8.642  | 9.784  |
| 13.5   | -0.254  | 0.108 | 5.642 | 6.259 | 6.963    | 7.769 | 8.696 | -0.738 | 0.110 | 6.329 | 6.978 | 7.753    | 8.691  | 9.845  |
| 13.6   | -0.252  | 0.108 | 5.655 | 6.275 | 6.982    | 7.793 | 8.724 | -0.764 | 0.109 | 6.367 | 7.018 | 7.796    | 8.740  | 9.906  |
| 13.7   | -0.249  | 0.109 | 5.668 | 6.291 | 7.002    | 7.816 | 8.752 | -0.789 | 0.109 | 6.406 | 7.058 | 7.838    | 8.789  | 9.967  |
| 13.8   | -0.246  | 0.109 | 5.680 | 6.306 | 7.020    | 7.839 | 8.779 | -0.815 | 0.109 | 6.444 | 7.097 | 7.881    | 8.837  | 10.027 |
| 13.9   | -0.243  | 0.109 | 5.692 | 6.321 | 7.039    | 7.861 | 8.806 | -0.840 | 0.109 | 6.482 | 7.136 | 7.923    | 8.885  | 10.087 |
| 14.0   | -0.241  | 0.109 | 5.703 | 6.335 | 7.056    | 7.882 | 8.832 | -0.866 | 0.109 | 6.520 | 7.175 | 7.964    | 8.933  | 10.147 |
| 14.1   | -0.238  | 0.109 | 5.714 | 6.349 | 7.074    | 7.904 | 8.858 | -0.892 | 0.109 | 6.558 | 7.213 | 8.006    | 8.980  | 10.206 |
| 14.2   | -0.235  | 0.110 | 5.725 | 6.363 | 7.091    | 7.924 | 8.883 | -0.917 | 0.109 | 6.595 | 7.252 | 8.046    | 9.027  | 10.265 |
| 14.3   | -0.232  | 0.110 | 5.735 | 6.376 | 7.107    | 7.945 | 8.907 | -0.943 | 0.109 | 6.631 | 7.289 | 8.087    | 9.073  | 10.324 |
| 14.4   | -0.229  | 0.110 | 5.745 | 6.388 | 7.123    | 7.965 | 8.931 | -0.969 | 0.109 | 6.668 | 7.326 | 8.126    | 9.119  | 10.382 |
| 14.5   | -0.227  | 0.110 | 5.754 | 6.401 | 7.139    | 7.984 | 8.955 | -0.994 | 0.109 | 6.704 | 7.363 | 8.166    | 9.164  | 10.439 |
| 14.6   | -0.224  | 0.111 | 5.763 | 6.413 | 7.154    | 8.003 | 8.978 | -1.020 | 0.109 | 6.739 | 7.399 | 8.204    | 9.209  | 10.496 |
| 14.7   | -0.221  | 0.111 | 5.772 | 6.424 | 7.169    | 8.021 | 9.001 | -1.045 | 0.109 | 6.774 | 7.435 | 8.243    | 9.252  | 10.553 |
| 14.8   | -0.218  | 0.111 | 5.781 | 6.436 | 7.183    | 8.039 | 9.023 | -1.071 | 0.109 | 6.809 | 7.470 | 8.280    | 9.296  | 10.608 |
| 14.9   | -0.215  | 0.111 | 5.789 | 6.447 | 7.197    | 8.057 | 9.045 | -1.097 | 0.109 | 6.843 | 7.505 | 8.317    | 9.338  | 10.663 |
| 15.0   | -0.213  | 0.112 | 5.797 | 6.457 | 7.211    | 8.074 | 9.066 | -1.122 | 0.109 | 6.876 | 7.539 | 8.353    | 9.380  | 10.718 |
| 15.1   | -0.210  | 0.112 | 5.804 | 6.467 | 7.224    | 8.091 | 9.087 | -1.148 | 0.109 | 6.909 | 7.572 | 8.389    | 9.421  | 10.771 |
| 15.2   | -0.207  | 0.112 | 5.811 | 6.477 | 7.237    | 8.107 | 9.107 | -1.173 | 0.109 | 6.942 | 7.605 | 8.423    | 9.461  | 10.824 |
| 15.3   | -0.204  | 0.112 | 5.818 | 6.487 | 7.250    | 8.123 | 9.127 | -1.199 | 0.109 | 6.973 | 7.637 | 8.457    | 9.501  | 10.876 |
| 15.4   | -0.202  | 0.113 | 5.825 | 6.496 | 7.262    | 8.139 | 9.146 | -1.225 | 0.109 | 7.004 | 7.668 | 8.491    | 9.539  | 10.927 |
| 15.5   | -0.199  | 0.113 | 5.831 | 6.505 | 7.274    | 8.154 | 9.166 | -1.250 | 0.108 | 7.035 | 7.699 | 8.523    | 9.577  | 10.977 |
| 15.6   | -0.196  | 0.113 | 5.837 | 6.513 | 7.285    | 8.169 | 9.184 | -1.276 | 0.108 | 7.065 | 7.729 | 8.555    | 9.614  | 11.026 |
| 15.7   | -0.193  | 0.113 | 5.843 | 6.522 | 7.297    | 8.184 | 9.203 | -1.301 | 0.108 | 7.094 | 7.758 | 8.586    | 9.650  | 11.075 |
| 15.8   | -0.190  | 0.114 | 5.849 | 6.530 | 7.308    | 8.198 | 9.221 | -1.327 | 0.108 | 7.122 | 7.787 | 8.616    | 9.685  | 11.123 |
| 15.9   | -0.188  | 0.114 | 5.854 | 6.538 | 7.318    | 8.212 | 9.239 | -1.353 | 0.108 | 7.150 | 7.815 | 8.645    | 9.719  | 11.169 |
| 16.0   | -0.185  | 0.114 | 5.859 | 6.545 | 7.329    | 8.226 | 9.256 | -1.378 | 0.108 | 7.177 | 7.842 | 8.674    | 9.752  | 11.215 |
| 16.1   | -0.182  | 0.115 | 5.864 | 6.553 | 7.339    | 8.239 | 9.273 | -1.404 | 0.108 | 7.204 | 7.868 | 8.701    | 9.784  | 11.260 |
| 16.2   | -0.179  | 0.115 | 5.869 | 6.560 | 7.349    | 8.253 | 9.290 | -1.429 | 0.108 | 7.230 | 7.893 | 8.728    | 9.815  | 11.304 |
| 16.3   | -0.177  | 0.115 | 5.873 | 6.567 | 7.359    | 8.265 | 9.307 | -1.455 | 0.108 | 7.255 | 7.918 | 8.754    | 9.846  | 11.346 |
| 16.4   | -0.174  | 0.115 | 5.877 | 6.573 | 7.368    | 8.278 | 9.323 | -1.481 | 0.108 | 7.279 | 7.942 | 8.779    | 9.875  | 11.388 |
| 16.5   | -0.171  | 0.116 | 5.881 | 6.580 | 7.377    | 8.291 | 9.339 | -1.506 | 0.108 | 7.302 | 7.965 | 8.803    | 9.903  | 11.429 |
| 16.6   | -0.168  | 0.116 | 5.885 | 6.586 | 7.386    | 8.303 | 9.355 | -1.532 | 0.108 | 7.325 | 7.988 | 8.826    | 9.931  | 11.469 |
| 16.7   | -0.165  | 0.116 | 5.889 | 6.592 | 7.395    | 8.315 | 9.370 | -1.558 | 0.108 | 7.347 | 8.009 | 8.849    | 9.957  | 11.508 |
| 16.8   | -0.163  | 0.116 | 5.892 | 6.598 | 7.404    | 8.326 | 9.385 | -1.583 | 0.108 | 7.369 | 8.030 | 8.870    | 9.983  | 11.546 |
| 16.9   | -0.160  | 0.117 | 5.895 | 6.603 | 7.412    | 8.338 | 9.400 | -1.609 | 0.108 | 7.389 | 8.050 | 8.891    | 10.007 | 11.583 |
| 17.0   | -0.157  | 0.117 | 5.899 | 6.609 | 7.420    | 8.349 | 9.415 | -1.634 | 0.108 | 7.409 | 8.069 | 8.910    | 10.030 | 11.619 |
| 17.1   | -0.154  | 0.117 | 5.901 | 6.614 | 7.428    | 8.360 | 9.429 | -1.660 | 0.108 | 7.428 | 8.087 | 8.929    | 10.053 | 11.654 |
| 17.2   | -0.151  | 0.117 | 5.904 | 6.619 | 7.436    | 8.371 | 9.443 | -1.686 | 0.108 | 7.447 | 8.105 | 8.947    | 10.074 | 11.688 |

| Age, y | Females |       |       |       |          |       |       | Males  |       |       |       |          |        |        |
|--------|---------|-------|-------|-------|----------|-------|-------|--------|-------|-------|-------|----------|--------|--------|
|        | L       | S     | -2 SD | -1 SD | 0 SD (M) | 1 SD  | 2 SD  | L      | S     | -2 SD | -1 SD | 0 SD (M) | 1 SD   | 2 SD   |
| 17.3   | -0.149  | 0.118 | 5.907 | 6.624 | 7.443    | 8.381 | 9.457 | -1.711 | 0.108 | 7.464 | 8.122 | 8.964    | 10.095 | 11.720 |
| 17.4   | -0.146  | 0.118 | 5.909 | 6.629 | 7.451    | 8.392 | 9.471 | -1.737 | 0.107 | 7.481 | 8.138 | 8.980    | 10.115 | 11.753 |
| 17.5   | -0.143  | 0.118 | 5.911 | 6.633 | 7.458    | 8.402 | 9.485 | -1.762 | 0.107 | 7.498 | 8.153 | 8.996    | 10.133 | 11.784 |
| 17.6   | -0.140  | 0.118 | 5.913 | 6.638 | 7.465    | 8.412 | 9.498 | -1.788 | 0.107 | 7.513 | 8.167 | 9.010    | 10.151 | 11.814 |
| 17.7   | -0.138  | 0.119 | 5.915 | 6.642 | 7.472    | 8.421 | 9.511 | -1.814 | 0.107 | 7.528 | 8.181 | 9.024    | 10.168 | 11.843 |
| 17.8   | -0.135  | 0.119 | 5.917 | 6.646 | 7.478    | 8.431 | 9.524 | -1.839 | 0.107 | 7.542 | 8.194 | 9.037    | 10.184 | 11.871 |
| 17.9   | -0.132  | 0.119 | 5.918 | 6.650 | 7.485    | 8.440 | 9.536 | -1.865 | 0.107 | 7.556 | 8.207 | 9.049    | 10.199 | 11.899 |
| 18.0   | -0.129  | 0.119 | 5.920 | 6.653 | 7.491    | 8.449 | 9.549 | -1.890 | 0.107 | 7.569 | 8.218 | 9.060    | 10.213 | 11.925 |
| 18.1   | -0.126  | 0.120 | 5.921 | 6.657 | 7.497    | 8.458 | 9.561 | -1.916 | 0.107 | 7.581 | 8.229 | 9.071    | 10.226 | 11.951 |
| 18.2   | -0.124  | 0.120 | 5.922 | 6.660 | 7.503    | 8.467 | 9.573 | -1.942 | 0.107 | 7.592 | 8.239 | 9.081    | 10.239 | 11.976 |
| 18.3   | -0.121  | 0.120 | 5.923 | 6.663 | 7.509    | 8.476 | 9.585 | -1.967 | 0.107 | 7.603 | 8.249 | 9.090    | 10.250 | 12.000 |
| 18.4   | -0.118  | 0.121 | 5.924 | 6.666 | 7.514    | 8.484 | 9.597 | -1.993 | 0.107 | 7.614 | 8.258 | 9.098    | 10.261 | 12.023 |
| 18.5   | -0.115  | 0.121 | 5.925 | 6.669 | 7.520    | 8.493 | 9.608 | -2.019 | 0.107 | 7.623 | 8.266 | 9.106    | 10.271 | 12.046 |
| 18.6   | -0.113  | 0.121 | 5.925 | 6.672 | 7.525    | 8.501 | 9.619 | -2.044 | 0.107 | 7.633 | 8.274 | 9.113    | 10.281 | 12.068 |
| 18.7   | -0.110  | 0.121 | 5.926 | 6.675 | 7.530    | 8.509 | 9.631 | -2.070 | 0.107 | 7.641 | 8.281 | 9.120    | 10.289 | 12.090 |
| 18.8   | -0.107  | 0.122 | 5.926 | 6.677 | 7.535    | 8.517 | 9.642 | -2.095 | 0.107 | 7.650 | 8.288 | 9.126    | 10.298 | 12.111 |
| 18.9   | -0.104  | 0.122 | 5.926 | 6.680 | 7.540    | 8.524 | 9.652 | -2.121 | 0.107 | 7.657 | 8.294 | 9.131    | 10.305 | 12.131 |
| 19.0   | -0.101  | 0.122 | 5.927 | 6.682 | 7.545    | 8.532 | 9.663 | -2.147 | 0.107 | 7.665 | 8.300 | 9.136    | 10.312 | 12.151 |
| 19.1   | -0.099  | 0.122 | 5.927 | 6.684 | 7.549    | 8.539 | 9.674 | -2.172 | 0.107 | 7.672 | 8.305 | 9.140    | 10.318 | 12.170 |
| 19.2   | -0.096  | 0.123 | 5.926 | 6.686 | 7.554    | 8.547 | 9.684 | -2.198 | 0.107 | 7.678 | 8.310 | 9.144    | 10.324 | 12.189 |
| 19.3   | -0.093  | 0.123 | 5.926 | 6.688 | 7.558    | 8.554 | 9.694 | -2.223 | 0.106 | 7.684 | 8.314 | 9.148    | 10.330 | 12.207 |
| 19.4   | -0.090  | 0.123 | 5.926 | 6.690 | 7.563    | 8.561 | 9.705 | -2.249 | 0.106 | 7.690 | 8.318 | 9.151    | 10.335 | 12.226 |
| 19.5   | -0.087  | 0.124 | 5.926 | 6.692 | 7.567    | 8.568 | 9.715 | -2.275 | 0.106 | 7.696 | 8.322 | 9.154    | 10.339 | 12.244 |
| 19.6   | -0.085  | 0.124 | 5.925 | 6.693 | 7.571    | 8.575 | 9.725 | -2.300 | 0.106 | 7.701 | 8.326 | 9.156    | 10.344 | 12.261 |
| 19.7   | -0.082  | 0.124 | 5.925 | 6.695 | 7.575    | 8.582 | 9.735 | -2.326 | 0.106 | 7.706 | 8.329 | 9.159    | 10.348 | 12.279 |
| 19.8   | -0.079  | 0.124 | 5.924 | 6.697 | 7.579    | 8.589 | 9.744 | -2.351 | 0.106 | 7.711 | 8.332 | 9.161    | 10.351 | 12.296 |
| 19.9   | -0.076  | 0.125 | 5.923 | 6.698 | 7.583    | 8.595 | 9.754 | -2.377 | 0.106 | 7.715 | 8.335 | 9.162    | 10.355 | 12.314 |
| 20.0   | -0.074  | 0.125 | 5.923 | 6.700 | 7.587    | 8.602 | 9.764 | -2.403 | 0.106 | 7.720 | 8.337 | 9.164    | 10.358 | 12.331 |



















| Age, y | Females |       |        |        |          |        |        | Males  |       |        |        |          |        |        |
|--------|---------|-------|--------|--------|----------|--------|--------|--------|-------|--------|--------|----------|--------|--------|
|        | L       | S     | -2 SD  | -1 SD  | 0 SD (M) | 1 SD   | 2 SD   | L      | S     | -2 SD  | -1 SD  | 0 SD (M) | 1 SD   | 2 SD   |
| 19.0   | 0.159   | 0.104 | 13.388 | 14.895 | 16.542   | 18.339 | 20.298 | -2.092 | 0.098 | 16.147 | 17.411 | 19.042   | 21.261 | 24.543 |
| 19.1   | 0.165   | 0.104 | 13.386 | 14.899 | 16.551   | 18.353 | 20.316 | -2.113 | 0.098 | 16.164 | 17.427 | 19.058   | 21.284 | 24.587 |
| 19.2   | 0.171   | 0.105 | 13.384 | 14.902 | 16.559   | 18.366 | 20.334 | -2.134 | 0.099 | 16.181 | 17.442 | 19.074   | 21.305 | 24.631 |
| 19.3   | 0.178   | 0.105 | 13.382 | 14.905 | 16.567   | 18.379 | 20.351 | -2.155 | 0.099 | 16.196 | 17.456 | 19.089   | 21.326 | 24.676 |
| 19.4   | 0.184   | 0.105 | 13.379 | 14.907 | 16.575   | 18.392 | 20.368 | -2.176 | 0.099 | 16.210 | 17.469 | 19.102   | 21.346 | 24.720 |
| 19.5   | 0.190   | 0.105 | 13.376 | 14.910 | 16.582   | 18.404 | 20.384 | -2.197 | 0.099 | 16.223 | 17.481 | 19.115   | 21.366 | 24.765 |
| 19.6   | 0.196   | 0.106 | 13.373 | 14.912 | 16.590   | 18.416 | 20.400 | -2.218 | 0.099 | 16.236 | 17.492 | 19.127   | 21.385 | 24.811 |
| 19.7   | 0.203   | 0.106 | 13.370 | 14.914 | 16.597   | 18.428 | 20.416 | -2.239 | 0.099 | 16.247 | 17.502 | 19.139   | 21.404 | 24.857 |
| 19.8   | 0.209   | 0.106 | 13.366 | 14.915 | 16.603   | 18.439 | 20.432 | -2.260 | 0.099 | 16.257 | 17.512 | 19.150   | 21.422 | 24.904 |
| 19.9   | 0.215   | 0.106 | 13.362 | 14.917 | 16.610   | 18.450 | 20.447 | -2.281 | 0.099 | 16.267 | 17.521 | 19.160   | 21.441 | 24.953 |
| 20.0   | 0.222   | 0.107 | 13.358 | 14.918 | 16.616   | 18.461 | 20.462 | -2.302 | 0.099 | 16.276 | 17.529 | 19.169   | 21.459 | 25.003 |











| Age, y | Females |       |        |        |          |        |        | Males  |       |        |        |          |        |        |
|--------|---------|-------|--------|--------|----------|--------|--------|--------|-------|--------|--------|----------|--------|--------|
|        | L       | S     | -2 SD  | -1 SD  | 0 SD (M) | 1 SD   | 2 SD   | L      | S     | -2 SD  | -1 SD  | 0 SD (M) | 1 SD   | 2 SD   |
| 19.0   | 0.157   | 0.106 | 12.369 | 13.786 | 15.337   | 17.034 | 18.885 | -1.993 | 0.106 | 15.002 | 16.258 | 17.892   | 20.144 | 23.533 |
| 19.1   | 0.163   | 0.106 | 12.370 | 13.791 | 15.347   | 17.046 | 18.901 | -2.014 | 0.106 | 15.018 | 16.273 | 17.908   | 20.166 | 23.580 |
| 19.2   | 0.170   | 0.106 | 12.370 | 13.796 | 15.356   | 17.059 | 18.916 | -2.036 | 0.106 | 15.034 | 16.287 | 17.923   | 20.187 | 23.627 |
| 19.3   | 0.176   | 0.106 | 12.371 | 13.801 | 15.364   | 17.071 | 18.930 | -2.057 | 0.106 | 15.049 | 16.301 | 17.937   | 20.207 | 23.672 |
| 19.4   | 0.183   | 0.106 | 12.371 | 13.805 | 15.372   | 17.082 | 18.944 | -2.078 | 0.106 | 15.063 | 16.313 | 17.950   | 20.226 | 23.717 |
| 19.5   | 0.190   | 0.107 | 12.371 | 13.809 | 15.381   | 17.094 | 18.958 | -2.099 | 0.106 | 15.077 | 16.325 | 17.962   | 20.244 | 23.760 |
| 19.6   | 0.196   | 0.107 | 12.371 | 13.813 | 15.388   | 17.105 | 18.972 | -2.120 | 0.106 | 15.089 | 16.336 | 17.973   | 20.262 | 23.804 |
| 19.7   | 0.203   | 0.107 | 12.370 | 13.817 | 15.396   | 17.115 | 18.985 | -2.141 | 0.106 | 15.101 | 16.346 | 17.983   | 20.278 | 23.846 |
| 19.8   | 0.209   | 0.107 | 12.369 | 13.820 | 15.403   | 17.126 | 18.998 | -2.163 | 0.106 | 15.113 | 16.356 | 17.993   | 20.293 | 23.888 |
| 19.9   | 0.216   | 0.107 | 12.368 | 13.824 | 15.410   | 17.136 | 19.011 | -2.184 | 0.106 | 15.124 | 16.365 | 18.002   | 20.308 | 23.930 |
| 20.0   | 0.222   | 0.108 | 12.367 | 13.827 | 15.417   | 17.147 | 19.023 | -2.205 | 0.106 | 15.134 | 16.374 | 18.011   | 20.323 | 23.971 |

**Table S29. Total Lean Soft Tissue, kg**

| Non-Black Children |         |       |        |        |          |        |        |        |       |        |        |          |        |        |
|--------------------|---------|-------|--------|--------|----------|--------|--------|--------|-------|--------|--------|----------|--------|--------|
| Age, y             | Females |       |        |        |          |        |        | Males  |       |        |        |          |        |        |
|                    | L       | S     | -2 SD  | -1 SD  | 0 SD (M) | 1 SD   | 2 SD   | L      | S     | -2 SD  | -1 SD  | 0 SD (M) | 1 SD   | 2 SD   |
| 5.0                | 0.256   | 0.133 | 9.857  | 11.342 | 12.987   | 14.804 | 16.803 | -0.233 | 0.127 | 10.933 | 12.351 | 14.002   | 15.934 | 18.205 |
| 5.1                | 0.253   | 0.133 | 10.006 | 11.512 | 13.182   | 15.026 | 17.056 | -0.229 | 0.127 | 11.091 | 12.530 | 14.206   | 16.166 | 18.470 |
| 5.2                | 0.249   | 0.133 | 10.156 | 11.683 | 13.376   | 15.248 | 17.309 | -0.226 | 0.127 | 11.248 | 12.709 | 14.410   | 16.399 | 18.735 |
| 5.3                | 0.246   | 0.133 | 10.305 | 11.853 | 13.571   | 15.469 | 17.562 | -0.223 | 0.127 | 11.405 | 12.889 | 14.615   | 16.632 | 19.000 |
| 5.4                | 0.242   | 0.133 | 10.455 | 12.024 | 13.765   | 15.691 | 17.815 | -0.219 | 0.127 | 11.563 | 13.068 | 14.819   | 16.865 | 19.266 |
| 5.5                | 0.239   | 0.133 | 10.604 | 12.194 | 13.959   | 15.913 | 18.068 | -0.216 | 0.128 | 11.721 | 13.248 | 15.024   | 17.098 | 19.531 |
| 5.6                | 0.235   | 0.133 | 10.754 | 12.364 | 14.154   | 16.134 | 18.320 | -0.213 | 0.128 | 11.879 | 13.428 | 15.229   | 17.332 | 19.798 |
| 5.7                | 0.232   | 0.133 | 10.903 | 12.535 | 14.348   | 16.356 | 18.573 | -0.209 | 0.128 | 12.037 | 13.609 | 15.435   | 17.566 | 20.064 |
| 5.8                | 0.228   | 0.133 | 11.053 | 12.705 | 14.542   | 16.577 | 18.826 | -0.206 | 0.128 | 12.195 | 13.789 | 15.641   | 17.801 | 20.331 |
| 5.9                | 0.225   | 0.133 | 11.202 | 12.875 | 14.736   | 16.799 | 19.079 | -0.203 | 0.128 | 12.354 | 13.970 | 15.847   | 18.036 | 20.599 |
| 6.0                | 0.221   | 0.133 | 11.352 | 13.046 | 14.930   | 17.021 | 19.332 | -0.199 | 0.128 | 12.513 | 14.152 | 16.054   | 18.272 | 20.867 |
| 6.1                | 0.217   | 0.133 | 11.502 | 13.216 | 15.125   | 17.242 | 19.585 | -0.196 | 0.128 | 12.672 | 14.333 | 16.261   | 18.508 | 21.136 |
| 6.2                | 0.214   | 0.133 | 11.652 | 13.387 | 15.319   | 17.464 | 19.838 | -0.193 | 0.128 | 12.832 | 14.515 | 16.469   | 18.745 | 21.405 |
| 6.3                | 0.210   | 0.133 | 11.802 | 13.558 | 15.514   | 17.686 | 20.092 | -0.189 | 0.128 | 12.992 | 14.698 | 16.677   | 18.982 | 21.675 |
| 6.4                | 0.207   | 0.133 | 11.953 | 13.729 | 15.709   | 17.909 | 20.346 | -0.186 | 0.128 | 13.152 | 14.881 | 16.886   | 19.220 | 21.946 |
| 6.5                | 0.203   | 0.133 | 12.103 | 13.901 | 15.904   | 18.132 | 20.601 | -0.183 | 0.128 | 13.313 | 15.065 | 17.096   | 19.458 | 22.217 |
| 6.6                | 0.200   | 0.133 | 12.255 | 14.073 | 16.100   | 18.355 | 20.856 | -0.179 | 0.128 | 13.474 | 15.249 | 17.306   | 19.698 | 22.490 |
| 6.7                | 0.196   | 0.133 | 12.406 | 14.245 | 16.296   | 18.579 | 21.112 | -0.176 | 0.128 | 13.635 | 15.433 | 17.516   | 19.938 | 22.763 |
| 6.8                | 0.193   | 0.133 | 12.558 | 14.418 | 16.493   | 18.804 | 21.368 | -0.173 | 0.128 | 13.797 | 15.618 | 17.728   | 20.179 | 23.037 |
| 6.9                | 0.189   | 0.133 | 12.711 | 14.591 | 16.691   | 19.029 | 21.626 | -0.169 | 0.128 | 13.960 | 15.804 | 17.940   | 20.420 | 23.312 |
| 7.0                | 0.186   | 0.133 | 12.864 | 14.765 | 16.889   | 19.255 | 21.885 | -0.166 | 0.128 | 14.123 | 15.990 | 18.152   | 20.663 | 23.587 |
| 7.1                | 0.182   | 0.133 | 13.019 | 14.941 | 17.089   | 19.483 | 22.145 | -0.163 | 0.128 | 14.286 | 16.177 | 18.365   | 20.906 | 23.864 |
| 7.2                | 0.179   | 0.133 | 13.174 | 15.117 | 17.289   | 19.712 | 22.407 | -0.159 | 0.128 | 14.450 | 16.364 | 18.579   | 21.149 | 24.141 |
| 7.3                | 0.175   | 0.133 | 13.330 | 15.294 | 17.491   | 19.943 | 22.670 | -0.156 | 0.128 | 14.614 | 16.552 | 18.794   | 21.394 | 24.419 |
| 7.4                | 0.171   | 0.133 | 13.488 | 15.473 | 17.695   | 20.175 | 22.936 | -0.153 | 0.128 | 14.778 | 16.741 | 19.009   | 21.639 | 24.697 |
| 7.5                | 0.168   | 0.133 | 13.646 | 15.653 | 17.900   | 20.409 | 23.203 | -0.149 | 0.128 | 14.943 | 16.929 | 19.225   | 21.885 | 24.977 |
| 7.6                | 0.164   | 0.133 | 13.806 | 15.835 | 18.107   | 20.645 | 23.473 | -0.146 | 0.128 | 15.109 | 17.119 | 19.441   | 22.131 | 25.257 |
| 7.7                | 0.161   | 0.133 | 13.968 | 16.018 | 18.316   | 20.883 | 23.746 | -0.142 | 0.128 | 15.274 | 17.308 | 19.658   | 22.378 | 25.538 |
| 7.8                | 0.157   | 0.133 | 14.132 | 16.204 | 18.527   | 21.124 | 24.022 | -0.139 | 0.128 | 15.440 | 17.499 | 19.875   | 22.626 | 25.820 |
| 7.9                | 0.154   | 0.133 | 14.297 | 16.392 | 18.741   | 21.368 | 24.301 | -0.136 | 0.129 | 15.607 | 17.689 | 20.093   | 22.875 | 26.102 |
| 8.0                | 0.150   | 0.133 | 14.465 | 16.582 | 18.957   | 21.615 | 24.584 | -0.132 | 0.129 | 15.774 | 17.881 | 20.312   | 23.124 | 26.386 |
| 8.1                | 0.147   | 0.132 | 14.635 | 16.775 | 19.177   | 21.866 | 24.870 | -0.129 | 0.129 | 15.942 | 18.073 | 20.532   | 23.375 | 26.670 |
| 8.2                | 0.143   | 0.132 | 14.808 | 16.971 | 19.400   | 22.120 | 25.162 | -0.126 | 0.129 | 16.110 | 18.266 | 20.752   | 23.626 | 26.956 |
| 8.3                | 0.140   | 0.132 | 14.983 | 17.170 | 19.626   | 22.379 | 25.458 | -0.122 | 0.129 | 16.279 | 18.460 | 20.974   | 23.879 | 27.243 |
| 8.4                | 0.136   | 0.132 | 15.162 | 17.373 | 19.857   | 22.642 | 25.758 | -0.119 | 0.129 | 16.448 | 18.654 | 21.196   | 24.132 | 27.531 |
| 8.5                | 0.132   | 0.132 | 15.344 | 17.579 | 20.091   | 22.910 | 26.065 | -0.116 | 0.129 | 16.619 | 18.850 | 21.420   | 24.387 | 27.820 |
| 8.6                | 0.129   | 0.132 | 15.529 | 17.789 | 20.330   | 23.182 | 26.377 | -0.112 | 0.129 | 16.790 | 19.046 | 21.644   | 24.643 | 28.111 |
| 8.7                | 0.125   | 0.132 | 15.718 | 18.003 | 20.574   | 23.460 | 26.695 | -0.109 | 0.129 | 16.962 | 19.243 | 21.870   | 24.901 | 28.404 |
| 8.8                | 0.122   | 0.132 | 15.910 | 18.221 | 20.822   | 23.743 | 27.019 | -0.106 | 0.129 | 17.135 | 19.442 | 22.098   | 25.160 | 28.698 |
| 8.9                | 0.118   | 0.132 | 16.106 | 18.443 | 21.075   | 24.032 | 27.349 | -0.102 | 0.129 | 17.310 | 19.643 | 22.327   | 25.421 | 28.995 |
| 9.0                | 0.115   | 0.132 | 16.306 | 18.670 | 21.333   | 24.327 | 27.687 | -0.099 | 0.129 | 17.486 | 19.845 | 22.558   | 25.685 | 29.295 |
| 9.1                | 0.111   | 0.132 | 16.511 | 18.902 | 21.597   | 24.628 | 28.031 | -0.096 | 0.129 | 17.663 | 20.049 | 22.792   | 25.951 | 29.597 |
| 9.2                | 0.108   | 0.132 | 16.719 | 19.139 | 21.866   | 24.935 | 28.383 | -0.092 | 0.129 | 17.843 | 20.255 | 23.028   | 26.220 | 29.903 |
| 9.3                | 0.104   | 0.132 | 16.933 | 19.381 | 22.142   | 25.249 | 28.742 | -0.089 | 0.129 | 18.024 | 20.464 | 23.267   | 26.493 | 30.212 |
| 9.4                | 0.101   | 0.132 | 17.151 | 19.628 | 22.423   | 25.570 | 29.110 | -0.086 | 0.129 | 18.208 | 20.675 | 23.508   | 26.769 | 30.525 |
| 9.5                | 0.097   | 0.132 | 17.373 | 19.880 | 22.709   | 25.898 | 29.484 | -0.082 | 0.129 | 18.395 | 20.889 | 23.754   | 27.048 | 30.843 |
| 9.6                | 0.093   | 0.132 | 17.600 | 20.137 | 23.002   | 26.232 | 29.867 | -0.079 | 0.129 | 18.584 | 21.106 | 24.002   | 27.332 | 31.165 |
| 9.7                | 0.090   | 0.132 | 17.831 | 20.400 | 23.301   | 26.572 | 30.257 | -0.076 | 0.129 | 18.776 | 21.327 | 24.255   | 27.620 | 31.492 |
| 9.8                | 0.086   | 0.132 | 18.067 | 20.667 | 23.605   | 26.920 | 30.654 | -0.072 | 0.129 | 18.971 | 21.552 | 24.512   | 27.913 | 31.825 |
| 9.9                | 0.083   | 0.132 | 18.308 | 20.940 | 23.915   | 27.274 | 31.060 | -0.069 | 0.129 | 19.170 | 21.780 | 24.774   | 28.212 | 32.164 |
| 10.0               | 0.079   | 0.132 | 18.553 | 21.218 | 24.231   | 27.634 | 31.473 | -0.066 | 0.129 | 19.373 | 22.014 | 25.041   | 28.516 | 32.510 |
| 10.1               | 0.076   | 0.132 | 18.803 | 21.501 | 24.553   | 28.001 | 31.893 | -0.062 | 0.129 | 19.581 | 22.252 | 25.314   | 28.827 | 32.863 |
| 10.2               | 0.072   | 0.132 | 19.056 | 21.789 | 24.880   | 28.375 | 32.321 | -0.059 | 0.129 | 19.792 | 22.495 | 25.593   | 29.145 | 33.223 |
| 10.3               | 0.069   | 0.132 | 19.315 | 22.081 | 25.213   | 28.755 | 32.756 | -0.056 | 0.130 | 20.009 | 22.744 | 25.878   | 29.470 | 33.593 |
| 10.4               | 0.065   | 0.132 | 19.577 | 22.378 | 25.551   | 29.140 | 33.197 | -0.052 | 0.130 | 20.231 | 23.000 | 26.170   | 29.803 | 33.971 |
| 10.5               | 0.062   | 0.132 | 19.842 | 22.679 | 25.893   | 29.531 | 33.645 | -0.049 | 0.130 | 20.458 | 23.261 | 26.469   | 30.144 | 34.358 |
| 10.6               | 0.058   | 0.132 | 20.111 | 22.984 | 26.240   | 29.927 | 34.098 | -0.046 | 0.130 | 20.691 | 23.529 | 26.776   | 30.494 | 34.756 |
| 10.7               | 0.055   | 0.132 | 20.383 | 23.292 | 26.590   | 30.327 | 34.556 | -0.042 | 0.130 | 20.931 | 23.804 | 27.091   | 30.853 | 35.163 |
| 10.8               | 0.051   | 0.132 | 20.658 | 23.604 | 26.945   | 30.731 | 35.019 | -0.039 | 0.130 | 21.176 | 24.086 | 27.414   | 31.221 | 35.581 |
| 10.9               | 0.047   | 0.132 | 20.936 | 23.918 | 27.302   | 31.139 | 35.487 | -0.035 | 0.130 | 21.428 | 24.376 | 27.745   | 31.599 | 36.011 |
| 11.0               | 0.044   | 0.132 | 21.216 | 24.235 | 27.662   | 31.551 | 35.958 | -0.032 | 0.130 | 21.687 | 24.673 | 28.086   | 31.988 | 36.451 |
| 11.1               | 0.040   | 0.132 | 21.498 | 24.554 | 28.025   | 31.965 | 36.433 | -0.029 | 0.130 | 21.953 | 24.979 | 28.435   | 32.386 | 36.904 |
| 11.2               | 0.037   | 0.132 | 21.781 | 24.875 | 28.390   | 32.381 | 36.910 | -0.025 | 0.130 | 22.226 | 25.292 | 28.795   | 32.796 | 37.369 |
| 11.3               | 0.033   | 0.132 | 22.066 | 25.197 | 28.756   | 32.799 | 37.388 | -0.022 | 0.130 | 22.506 | 25.615 | 29.164   | 33.217 | 37.847 |
| 11.4               | 0.030   | 0.132 | 22.351 | 25.520 | 29.123   | 33.217 | 37.868 | -0.019 | 0.130 | 22.794 | 25.946 | 29.543   | 33.649 | 38.338 |
| 11.5               | 0.026   | 0.132 | 22.636 | 25.842 | 29.489   | 33.636 | 38.348 | -0.015 | 0.130 | 23.090 | 26.286 | 29.932   | 34.093 | 38.842 |
| 11.6               | 0.023   | 0.132 | 22.921 | 26.165 | 29.856   | 34.054 | 38.828 | -0.012 | 0.130 | 23.394 | 26.635 | 30.332   | 34.549 | 39.360 |
| 11.7               | 0.019   | 0.132 | 23.205 | 26.486 | 30.221   | 34.471 | 39.306 | -0.009 | 0.130 | 23.705 | 26.993 | 30.741   | 35.015 | 39.890 |

| Age, y | Females |       |        |        |          |        |        | Males  |       |        |        |          |        |        |
|--------|---------|-------|--------|--------|----------|--------|--------|--------|-------|--------|--------|----------|--------|--------|
|        | L       | S     | -2 SD  | -1 SD  | 0 SD (M) | 1 SD   | 2 SD   | L      | S     | -2 SD  | -1 SD  | 0 SD (M) | 1 SD   | 2 SD   |
| 11.8   | 0.016   | 0.132 | 23.489 | 26.807 | 30.585   | 34.887 | 39.783 | -0.005 | 0.130 | 24.024 | 27.359 | 31.161   | 35.494 | 40.433 |
| 11.9   | 0.012   | 0.132 | 23.770 | 27.125 | 30.947   | 35.300 | 40.257 | -0.002 | 0.130 | 24.349 | 27.734 | 31.590   | 35.983 | 40.988 |
| 12.0   | 0.008   | 0.132 | 24.050 | 27.441 | 31.306   | 35.710 | 40.727 | 0.001  | 0.130 | 24.683 | 28.117 | 32.028   | 36.483 | 41.556 |
| 12.1   | 0.005   | 0.132 | 24.327 | 27.754 | 31.662   | 36.116 | 41.193 | 0.005  | 0.130 | 25.023 | 28.508 | 32.476   | 36.993 | 42.136 |
| 12.2   | 0.001   | 0.132 | 24.602 | 28.065 | 32.014   | 36.518 | 41.655 | 0.008  | 0.130 | 25.370 | 28.907 | 32.933   | 37.515 | 42.728 |
| 12.3   | -0.002  | 0.132 | 24.873 | 28.371 | 32.362   | 36.915 | 42.111 | 0.011  | 0.130 | 25.724 | 29.314 | 33.399   | 38.046 | 43.331 |
| 12.4   | -0.006  | 0.132 | 25.141 | 28.673 | 32.705   | 37.307 | 42.561 | 0.015  | 0.130 | 26.085 | 29.729 | 33.874   | 38.588 | 43.946 |
| 12.5   | -0.009  | 0.132 | 25.405 | 28.971 | 33.043   | 37.693 | 43.004 | 0.018  | 0.130 | 26.452 | 30.151 | 34.357   | 39.139 | 44.572 |
| 12.6   | -0.013  | 0.132 | 25.665 | 29.264 | 33.375   | 38.072 | 43.440 | 0.021  | 0.130 | 26.824 | 30.580 | 34.848   | 39.698 | 45.207 |
| 12.7   | -0.016  | 0.132 | 25.919 | 29.551 | 33.701   | 38.444 | 43.867 | 0.025  | 0.131 | 27.202 | 31.015 | 35.346   | 40.266 | 45.852 |
| 12.8   | -0.020  | 0.132 | 26.169 | 29.832 | 34.020   | 38.808 | 44.286 | 0.028  | 0.131 | 27.585 | 31.455 | 35.851   | 40.842 | 46.505 |
| 12.9   | -0.023  | 0.132 | 26.414 | 30.108 | 34.332   | 39.165 | 44.697 | 0.031  | 0.131 | 27.972 | 31.900 | 36.361   | 41.424 | 47.166 |
| 13.0   | -0.027  | 0.131 | 26.653 | 30.377 | 34.637   | 39.513 | 45.097 | 0.035  | 0.131 | 28.363 | 32.351 | 36.877   | 42.012 | 47.833 |
| 13.1   | -0.031  | 0.131 | 26.886 | 30.639 | 34.935   | 39.853 | 45.489 | 0.038  | 0.131 | 28.757 | 32.805 | 37.397   | 42.605 | 48.507 |
| 13.2   | -0.034  | 0.131 | 27.114 | 30.895 | 35.225   | 40.185 | 45.870 | 0.041  | 0.131 | 29.155 | 33.262 | 37.922   | 43.203 | 49.186 |
| 13.3   | -0.038  | 0.131 | 27.335 | 31.144 | 35.507   | 40.507 | 46.241 | 0.045  | 0.131 | 29.555 | 33.723 | 38.450   | 43.805 | 49.869 |
| 13.4   | -0.041  | 0.131 | 27.551 | 31.386 | 35.781   | 40.820 | 46.602 | 0.048  | 0.131 | 29.957 | 34.186 | 38.980   | 44.410 | 50.556 |
| 13.5   | -0.045  | 0.131 | 27.760 | 31.621 | 36.047   | 41.124 | 46.953 | 0.051  | 0.131 | 30.360 | 34.651 | 39.513   | 45.018 | 51.245 |
| 13.6   | -0.048  | 0.131 | 27.963 | 31.849 | 36.305   | 41.418 | 47.292 | 0.055  | 0.131 | 30.764 | 35.116 | 40.047   | 45.627 | 51.936 |
| 13.7   | -0.052  | 0.131 | 28.159 | 32.069 | 36.554   | 41.703 | 47.620 | 0.058  | 0.131 | 31.168 | 35.582 | 40.581   | 46.236 | 52.627 |
| 13.8   | -0.055  | 0.131 | 28.349 | 32.282 | 36.794   | 41.978 | 47.938 | 0.062  | 0.131 | 31.571 | 36.047 | 41.114   | 46.844 | 53.317 |
| 13.9   | -0.059  | 0.131 | 28.533 | 32.487 | 37.027   | 42.243 | 48.244 | 0.065  | 0.131 | 31.973 | 36.511 | 41.647   | 47.451 | 54.006 |
| 14.0   | -0.062  | 0.131 | 28.710 | 32.685 | 37.250   | 42.499 | 48.540 | 0.068  | 0.131 | 32.373 | 36.973 | 42.177   | 48.056 | 54.692 |
| 14.1   | -0.066  | 0.131 | 28.881 | 32.876 | 37.466   | 42.745 | 48.825 | 0.072  | 0.131 | 32.771 | 37.433 | 42.704   | 48.657 | 55.373 |
| 14.2   | -0.070  | 0.131 | 29.045 | 33.059 | 37.673   | 42.982 | 49.099 | 0.075  | 0.131 | 33.166 | 37.889 | 43.227   | 49.254 | 56.050 |
| 14.3   | -0.073  | 0.131 | 29.203 | 33.236 | 37.872   | 43.210 | 49.362 | 0.078  | 0.131 | 33.557 | 38.341 | 43.746   | 49.846 | 56.721 |
| 14.4   | -0.077  | 0.131 | 29.355 | 33.405 | 38.063   | 43.428 | 49.615 | 0.082  | 0.131 | 33.945 | 38.788 | 44.260   | 50.432 | 57.386 |
| 14.5   | -0.080  | 0.131 | 29.501 | 33.567 | 38.246   | 43.637 | 49.858 | 0.085  | 0.131 | 34.327 | 39.231 | 44.768   | 51.012 | 58.043 |
| 14.6   | -0.084  | 0.131 | 29.640 | 33.722 | 38.421   | 43.837 | 50.090 | 0.088  | 0.131 | 34.705 | 39.668 | 45.270   | 51.584 | 58.692 |
| 14.7   | -0.087  | 0.131 | 29.774 | 33.871 | 38.588   | 44.028 | 50.312 | 0.092  | 0.131 | 35.077 | 40.099 | 45.765   | 52.149 | 59.332 |
| 14.8   | -0.091  | 0.131 | 29.902 | 34.013 | 38.747   | 44.210 | 50.524 | 0.095  | 0.131 | 35.443 | 40.523 | 46.252   | 52.705 | 59.962 |
| 14.9   | -0.094  | 0.131 | 30.024 | 34.148 | 38.900   | 44.384 | 50.727 | 0.098  | 0.131 | 35.803 | 40.940 | 46.731   | 53.252 | 60.582 |
| 15.0   | -0.098  | 0.131 | 30.140 | 34.277 | 39.044   | 44.550 | 50.920 | 0.102  | 0.132 | 36.157 | 41.349 | 47.202   | 53.789 | 61.190 |
| 15.1   | -0.101  | 0.131 | 30.251 | 34.399 | 39.182   | 44.708 | 51.104 | 0.105  | 0.132 | 36.502 | 41.750 | 47.664   | 54.316 | 61.787 |
| 15.2   | -0.105  | 0.131 | 30.357 | 34.516 | 39.313   | 44.857 | 51.279 | 0.108  | 0.132 | 36.841 | 42.143 | 48.115   | 54.831 | 62.371 |
| 15.3   | -0.108  | 0.131 | 30.458 | 34.626 | 39.437   | 44.999 | 51.445 | 0.112  | 0.132 | 37.171 | 42.527 | 48.557   | 55.336 | 62.942 |
| 15.4   | -0.112  | 0.131 | 30.553 | 34.731 | 39.554   | 45.134 | 51.602 | 0.115  | 0.132 | 37.494 | 42.902 | 48.989   | 55.828 | 63.499 |
| 15.5   | -0.116  | 0.131 | 30.644 | 34.830 | 39.665   | 45.261 | 51.751 | 0.118  | 0.132 | 37.809 | 43.268 | 49.411   | 56.309 | 64.044 |
| 15.6   | -0.119  | 0.131 | 30.730 | 34.924 | 39.770   | 45.381 | 51.893 | 0.122  | 0.132 | 38.115 | 43.625 | 49.822   | 56.779 | 64.575 |
| 15.7   | -0.123  | 0.131 | 30.811 | 35.013 | 39.869   | 45.494 | 52.026 | 0.125  | 0.132 | 38.414 | 43.972 | 50.222   | 57.236 | 65.092 |
| 15.8   | -0.126  | 0.131 | 30.888 | 35.097 | 39.962   | 45.601 | 52.152 | 0.128  | 0.132 | 38.704 | 44.311 | 50.612   | 57.681 | 65.596 |
| 15.9   | -0.130  | 0.131 | 30.960 | 35.175 | 40.050   | 45.702 | 52.271 | 0.132  | 0.132 | 38.986 | 44.639 | 50.991   | 58.114 | 66.085 |
| 16.0   | -0.133  | 0.131 | 31.029 | 35.250 | 40.133   | 45.797 | 52.384 | 0.135  | 0.132 | 39.259 | 44.958 | 51.360   | 58.535 | 66.561 |
| 16.1   | -0.137  | 0.131 | 31.094 | 35.320 | 40.211   | 45.886 | 52.490 | 0.138  | 0.132 | 39.524 | 45.268 | 51.717   | 58.943 | 67.022 |
| 16.2   | -0.140  | 0.131 | 31.155 | 35.386 | 40.283   | 45.970 | 52.589 | 0.142  | 0.132 | 39.780 | 45.567 | 52.063   | 59.338 | 67.468 |
| 16.3   | -0.144  | 0.131 | 31.213 | 35.448 | 40.352   | 46.048 | 52.683 | 0.145  | 0.132 | 40.028 | 45.858 | 52.399   | 59.721 | 67.901 |
| 16.4   | -0.147  | 0.131 | 31.268 | 35.506 | 40.416   | 46.122 | 52.771 | 0.148  | 0.132 | 40.267 | 46.138 | 52.723   | 60.092 | 68.320 |
| 16.5   | -0.151  | 0.131 | 31.319 | 35.560 | 40.476   | 46.191 | 52.854 | 0.152  | 0.132 | 40.499 | 46.410 | 53.037   | 60.451 | 68.725 |
| 16.6   | -0.155  | 0.131 | 31.367 | 35.611 | 40.532   | 46.256 | 52.932 | 0.155  | 0.132 | 40.722 | 46.673 | 53.341   | 60.798 | 69.117 |
| 16.7   | -0.158  | 0.131 | 31.413 | 35.659 | 40.585   | 46.316 | 53.006 | 0.158  | 0.132 | 40.938 | 46.926 | 53.635   | 61.134 | 69.495 |
| 16.8   | -0.162  | 0.131 | 31.456 | 35.704 | 40.634   | 46.373 | 53.074 | 0.162  | 0.132 | 41.145 | 47.171 | 53.919   | 61.458 | 69.861 |
| 16.9   | -0.165  | 0.131 | 31.496 | 35.747 | 40.680   | 46.426 | 53.139 | 0.165  | 0.132 | 41.346 | 47.407 | 54.193   | 61.771 | 70.214 |
| 17.0   | -0.169  | 0.131 | 31.535 | 35.786 | 40.724   | 46.476 | 53.200 | 0.169  | 0.132 | 41.538 | 47.634 | 54.457   | 62.073 | 70.554 |
| 17.1   | -0.172  | 0.131 | 31.571 | 35.824 | 40.764   | 46.522 | 53.257 | 0.172  | 0.132 | 41.724 | 47.854 | 54.711   | 62.364 | 70.882 |
| 17.2   | -0.176  | 0.131 | 31.605 | 35.859 | 40.802   | 46.566 | 53.311 | 0.175  | 0.132 | 41.902 | 48.065 | 54.957   | 62.644 | 71.198 |
| 17.3   | -0.179  | 0.131 | 31.637 | 35.892 | 40.837   | 46.607 | 53.362 | 0.179  | 0.132 | 42.073 | 48.268 | 55.193   | 62.915 | 71.502 |
| 17.4   | -0.183  | 0.131 | 31.668 | 35.922 | 40.870   | 46.645 | 53.410 | 0.182  | 0.133 | 42.237 | 48.464 | 55.421   | 63.175 | 71.795 |
| 17.5   | -0.186  | 0.131 | 31.696 | 35.951 | 40.901   | 46.681 | 53.455 | 0.185  | 0.133 | 42.396 | 48.652 | 55.640   | 63.426 | 72.077 |
| 17.6   | -0.190  | 0.131 | 31.724 | 35.979 | 40.930   | 46.714 | 53.498 | 0.189  | 0.133 | 42.547 | 48.833 | 55.852   | 63.668 | 72.349 |
| 17.7   | -0.194  | 0.131 | 31.750 | 36.004 | 40.957   | 46.746 | 53.538 | 0.192  | 0.133 | 42.693 | 49.007 | 56.055   | 63.900 | 72.610 |
| 17.8   | -0.197  | 0.130 | 31.774 | 36.028 | 40.983   | 46.775 | 53.575 | 0.195  | 0.133 | 42.833 | 49.175 | 56.251   | 64.124 | 72.862 |
| 17.9   | -0.201  | 0.130 | 31.797 | 36.051 | 41.006   | 46.803 | 53.611 | 0.199  | 0.133 | 42.967 | 49.336 | 56.439   | 64.340 | 73.104 |
| 18.0   | -0.204  | 0.130 | 31.819 | 36.072 | 41.029   | 46.828 | 53.645 | 0.202  | 0.133 | 43.096 | 49.491 | 56.621   | 64.548 | 73.337 |
| 18.1   | -0.208  | 0.130 | 31.840 | 36.092 | 41.049   | 46.853 | 53.676 | 0.205  | 0.133 | 43.219 | 49.640 | 56.795   | 64.748 | 73.561 |
| 18.2   | -0.211  | 0.130 | 31.860 | 36.111 | 41.069   | 46.875 | 53.707 | 0.209  | 0.133 | 43.338 | 49.783 | 56.964   | 64.941 | 73.777 |
| 18.3   | -0.215  | 0.130 | 31.879 | 36.129 | 41.087   | 46.897 | 53.735 | 0.212  | 0.133 | 43.452 | 49.921 | 57.126   | 65.126 | 73.985 |
| 18.4   | -0.218  | 0.130 | 31.897 | 36.146 | 41.104   | 46.917 | 53.762 | 0.215  | 0.133 | 43.561 | 50.054 | 57.282   | 65.305 | 74.185 |
| 18.5   | -0.222  | 0.130 | 31.915 | 36.162 | 41.120   | 46.936 | 53.788 | 0.219  | 0.133 | 43.666 | 50.182 | 57.433   | 65.478 | 74.378 |
| 18.6   | -0.225  | 0.130 | 31.931 | 36.177 | 41.135   | 46.953 | 53.812 | 0.222  | 0.133 | 43.767 | 50.305 | 57.578   | 65.645 | 74.564 |
| 18.7   | -0.229  | 0.130 | 31.947 | 36.191 | 41.149   | 46.970 | 53.835 | 0.225  | 0.133 | 43.865 | 50.424 | 57.719   | 65.806 | 74.744 |

| Age, y | Females |       |        |        |          |        |        | Males |       |        |        |          |        |        |
|--------|---------|-------|--------|--------|----------|--------|--------|-------|-------|--------|--------|----------|--------|--------|
|        | L       | S     | -2 SD  | -1 SD  | 0 SD (M) | 1 SD   | 2 SD   | L     | S     | -2 SD  | -1 SD  | 0 SD (M) | 1 SD   | 2 SD   |
| 18.8   | -0.232  | 0.130 | 31.962 | 36.204 | 41.163   | 46.985 | 53.857 | 0.229 | 0.133 | 43.958 | 50.539 | 57.855   | 65.962 | 74.918 |
| 18.9   | -0.236  | 0.130 | 31.976 | 36.217 | 41.175   | 47.000 | 53.878 | 0.232 | 0.133 | 44.048 | 50.650 | 57.986   | 66.113 | 75.086 |
| 19.0   | -0.240  | 0.130 | 31.990 | 36.229 | 41.186   | 47.013 | 53.898 | 0.235 | 0.133 | 44.135 | 50.758 | 58.114   | 66.259 | 75.249 |
| 19.1   | -0.243  | 0.130 | 32.003 | 36.240 | 41.197   | 47.026 | 53.917 | 0.239 | 0.133 | 44.220 | 50.862 | 58.238   | 66.401 | 75.407 |
| 19.2   | -0.247  | 0.130 | 32.016 | 36.251 | 41.208   | 47.038 | 53.935 | 0.242 | 0.133 | 44.301 | 50.963 | 58.358   | 66.539 | 75.560 |
| 19.3   | -0.250  | 0.130 | 32.028 | 36.261 | 41.217   | 47.050 | 53.952 | 0.245 | 0.133 | 44.380 | 51.061 | 58.474   | 66.673 | 75.709 |
| 19.4   | -0.254  | 0.130 | 32.040 | 36.271 | 41.226   | 47.061 | 53.969 | 0.249 | 0.133 | 44.456 | 51.156 | 58.588   | 66.803 | 75.854 |
| 19.5   | -0.257  | 0.130 | 32.051 | 36.280 | 41.235   | 47.071 | 53.984 | 0.252 | 0.133 | 44.530 | 51.249 | 58.699   | 66.930 | 75.996 |
| 19.6   | -0.261  | 0.130 | 32.062 | 36.289 | 41.242   | 47.080 | 54.000 | 0.255 | 0.133 | 44.602 | 51.340 | 58.807   | 67.054 | 76.133 |
| 19.7   | -0.264  | 0.130 | 32.072 | 36.297 | 41.250   | 47.089 | 54.014 | 0.259 | 0.134 | 44.673 | 51.428 | 58.913   | 67.176 | 76.268 |
| 19.8   | -0.268  | 0.130 | 32.083 | 36.305 | 41.257   | 47.098 | 54.028 | 0.262 | 0.134 | 44.741 | 51.515 | 59.016   | 67.295 | 76.400 |
| 19.9   | -0.271  | 0.130 | 32.093 | 36.312 | 41.264   | 47.106 | 54.041 | 0.266 | 0.134 | 44.808 | 51.600 | 59.118   | 67.412 | 76.530 |
| 20.0   | -0.275  | 0.130 | 32.102 | 36.320 | 41.270   | 47.113 | 54.054 | 0.269 | 0.134 | 44.874 | 51.683 | 59.218   | 67.527 | 76.657 |

**Black Children**

| Age, y | Females |       |        |        |          |        |        | Males |       |        |        |          |        |        |
|--------|---------|-------|--------|--------|----------|--------|--------|-------|-------|--------|--------|----------|--------|--------|
|        | L       | S     | -2 SD  | -1 SD  | 0 SD (M) | 1 SD   | 2 SD   | L     | S     | -2 SD  | -1 SD  | 0 SD (M) | 1 SD   | 2 SD   |
| 5.0    | -0.166  | 0.138 | 10.284 | 11.754 | 13.475   | 15.497 | 17.882 | 1.035 | 0.113 | 11.400 | 13.081 | 14.755   | 16.421 | 18.082 |
| 5.1    | -0.163  | 0.138 | 10.457 | 11.949 | 13.695   | 15.745 | 18.160 | 1.027 | 0.114 | 11.573 | 13.286 | 14.992   | 16.693 | 18.390 |
| 5.2    | -0.159  | 0.138 | 10.630 | 12.144 | 13.915   | 15.992 | 18.438 | 1.020 | 0.114 | 11.746 | 13.490 | 15.230   | 16.966 | 18.698 |
| 5.3    | -0.156  | 0.137 | 10.803 | 12.340 | 14.135   | 16.240 | 18.715 | 1.013 | 0.115 | 11.918 | 13.694 | 15.468   | 17.238 | 19.007 |
| 5.4    | -0.152  | 0.137 | 10.976 | 12.535 | 14.356   | 16.488 | 18.992 | 1.005 | 0.115 | 12.090 | 13.898 | 15.705   | 17.511 | 19.316 |
| 5.5    | -0.149  | 0.137 | 11.149 | 12.731 | 14.576   | 16.735 | 19.270 | 0.998 | 0.115 | 12.262 | 14.102 | 15.943   | 17.784 | 19.626 |
| 5.6    | -0.145  | 0.136 | 11.323 | 12.928 | 14.797   | 16.983 | 19.547 | 0.990 | 0.116 | 12.434 | 14.306 | 16.181   | 18.058 | 19.937 |
| 5.7    | -0.142  | 0.136 | 11.498 | 13.124 | 15.019   | 17.232 | 19.825 | 0.983 | 0.116 | 12.605 | 14.510 | 16.419   | 18.332 | 20.249 |
| 5.8    | -0.138  | 0.136 | 11.673 | 13.321 | 15.240   | 17.480 | 20.102 | 0.975 | 0.117 | 12.776 | 14.713 | 16.657   | 18.607 | 20.561 |
| 5.9    | -0.135  | 0.136 | 11.848 | 13.519 | 15.462   | 17.729 | 20.380 | 0.968 | 0.117 | 12.946 | 14.917 | 16.895   | 18.882 | 20.875 |
| 6.0    | -0.131  | 0.135 | 12.024 | 13.717 | 15.685   | 17.979 | 20.658 | 0.960 | 0.118 | 13.117 | 15.120 | 17.133   | 19.157 | 21.189 |
| 6.1    | -0.127  | 0.135 | 12.201 | 13.916 | 15.909   | 18.229 | 20.937 | 0.953 | 0.118 | 13.287 | 15.323 | 17.372   | 19.432 | 21.503 |
| 6.2    | -0.124  | 0.135 | 12.378 | 14.116 | 16.133   | 18.480 | 21.217 | 0.945 | 0.119 | 13.456 | 15.526 | 17.610   | 19.708 | 21.818 |
| 6.3    | -0.120  | 0.134 | 12.557 | 14.317 | 16.358   | 18.732 | 21.498 | 0.938 | 0.119 | 13.626 | 15.728 | 17.848   | 19.984 | 22.134 |
| 6.4    | -0.117  | 0.134 | 12.736 | 14.519 | 16.585   | 18.985 | 21.779 | 0.930 | 0.120 | 13.795 | 15.930 | 18.086   | 20.260 | 22.451 |
| 6.5    | -0.113  | 0.134 | 12.917 | 14.722 | 16.813   | 19.239 | 22.062 | 0.923 | 0.120 | 13.963 | 16.133 | 18.324   | 20.537 | 22.768 |
| 6.6    | -0.110  | 0.134 | 13.098 | 14.926 | 17.042   | 19.495 | 22.347 | 0.915 | 0.121 | 14.132 | 16.334 | 18.562   | 20.813 | 23.085 |
| 6.7    | -0.106  | 0.133 | 13.282 | 15.132 | 17.272   | 19.753 | 22.633 | 0.908 | 0.121 | 14.300 | 16.536 | 18.800   | 21.090 | 23.403 |
| 6.8    | -0.103  | 0.133 | 13.466 | 15.340 | 17.505   | 20.012 | 22.921 | 0.900 | 0.122 | 14.467 | 16.737 | 19.038   | 21.367 | 23.722 |
| 6.9    | -0.099  | 0.133 | 13.652 | 15.549 | 17.739   | 20.273 | 23.211 | 0.893 | 0.122 | 14.635 | 16.938 | 19.276   | 21.644 | 24.041 |
| 7.0    | -0.096  | 0.132 | 13.840 | 15.760 | 17.975   | 20.537 | 23.503 | 0.885 | 0.123 | 14.802 | 17.139 | 19.513   | 21.922 | 24.360 |
| 7.1    | -0.092  | 0.132 | 14.030 | 15.973 | 18.214   | 20.803 | 23.799 | 0.878 | 0.123 | 14.969 | 17.340 | 19.751   | 22.199 | 24.681 |
| 7.2    | -0.089  | 0.132 | 14.222 | 16.189 | 18.455   | 21.072 | 24.097 | 0.870 | 0.124 | 15.135 | 17.541 | 19.990   | 22.478 | 25.003 |
| 7.3    | -0.085  | 0.132 | 14.417 | 16.407 | 18.700   | 21.344 | 24.398 | 0.863 | 0.124 | 15.302 | 17.742 | 20.228   | 22.757 | 25.325 |
| 7.4    | -0.082  | 0.131 | 14.614 | 16.628 | 18.947   | 21.619 | 24.703 | 0.856 | 0.124 | 15.470 | 17.943 | 20.467   | 23.037 | 25.649 |
| 7.5    | -0.078  | 0.131 | 14.813 | 16.852 | 19.197   | 21.898 | 25.012 | 0.848 | 0.125 | 15.637 | 18.145 | 20.707   | 23.318 | 25.975 |
| 7.6    | -0.075  | 0.131 | 15.016 | 17.079 | 19.451   | 22.180 | 25.325 | 0.841 | 0.125 | 15.805 | 18.347 | 20.948   | 23.600 | 26.302 |
| 7.7    | -0.071  | 0.130 | 15.221 | 17.310 | 19.708   | 22.467 | 25.643 | 0.833 | 0.126 | 15.973 | 18.550 | 21.189   | 23.884 | 26.630 |
| 7.8    | -0.068  | 0.130 | 15.430 | 17.544 | 19.970   | 22.758 | 25.965 | 0.826 | 0.126 | 16.142 | 18.754 | 21.431   | 24.168 | 26.961 |
| 7.9    | -0.064  | 0.130 | 15.641 | 17.781 | 20.235   | 23.053 | 26.291 | 0.818 | 0.127 | 16.312 | 18.959 | 21.675   | 24.455 | 27.293 |
| 8.0    | -0.061  | 0.130 | 15.857 | 18.022 | 20.505   | 23.352 | 26.623 | 0.811 | 0.127 | 16.482 | 19.165 | 21.920   | 24.743 | 27.628 |
| 8.1    | -0.057  | 0.129 | 16.075 | 18.267 | 20.778   | 23.657 | 26.960 | 0.803 | 0.128 | 16.654 | 19.372 | 22.167   | 25.034 | 27.966 |
| 8.2    | -0.054  | 0.129 | 16.297 | 18.517 | 21.056   | 23.966 | 27.302 | 0.796 | 0.128 | 16.827 | 19.581 | 22.416   | 25.327 | 28.307 |
| 8.3    | -0.050  | 0.129 | 16.523 | 18.770 | 21.339   | 24.280 | 27.650 | 0.788 | 0.129 | 17.002 | 19.792 | 22.667   | 25.623 | 28.652 |
| 8.4    | -0.046  | 0.128 | 16.753 | 19.027 | 21.626   | 24.600 | 28.003 | 0.781 | 0.129 | 17.179 | 20.005 | 22.921   | 25.921 | 29.000 |
| 8.5    | -0.043  | 0.128 | 16.987 | 19.289 | 21.919   | 24.924 | 28.362 | 0.773 | 0.130 | 17.358 | 20.220 | 23.178   | 26.224 | 29.352 |
| 8.6    | -0.039  | 0.128 | 17.225 | 19.556 | 22.216   | 25.255 | 28.727 | 0.766 | 0.130 | 17.538 | 20.438 | 23.437   | 26.529 | 29.709 |
| 8.7    | -0.036  | 0.128 | 17.466 | 19.826 | 22.518   | 25.590 | 29.098 | 0.758 | 0.130 | 17.722 | 20.658 | 23.700   | 26.839 | 30.070 |
| 8.8    | -0.032  | 0.127 | 17.712 | 20.101 | 22.825   | 25.931 | 29.475 | 0.751 | 0.131 | 17.908 | 20.882 | 23.966   | 27.153 | 30.436 |
| 8.9    | -0.029  | 0.127 | 17.962 | 20.381 | 23.137   | 26.277 | 29.858 | 0.743 | 0.131 | 18.096 | 21.109 | 24.236   | 27.471 | 30.807 |
| 9.0    | -0.025  | 0.127 | 18.215 | 20.665 | 23.453   | 26.629 | 30.246 | 0.736 | 0.132 | 18.288 | 21.339 | 24.511   | 27.794 | 31.184 |
| 9.1    | -0.022  | 0.127 | 18.473 | 20.953 | 23.775   | 26.985 | 30.641 | 0.728 | 0.132 | 18.483 | 21.573 | 24.789   | 28.123 | 31.567 |
| 9.2    | -0.018  | 0.126 | 18.734 | 21.246 | 24.101   | 27.347 | 31.040 | 0.721 | 0.133 | 18.682 | 21.811 | 25.072   | 28.456 | 31.956 |
| 9.3    | -0.015  | 0.126 | 19.000 | 21.543 | 24.432   | 27.714 | 31.446 | 0.713 | 0.133 | 18.884 | 22.054 | 25.360   | 28.795 | 32.352 |
| 9.4    | -0.011  | 0.126 | 19.269 | 21.844 | 24.767   | 28.087 | 31.857 | 0.706 | 0.133 | 19.090 | 22.301 | 25.654   | 29.141 | 32.755 |
| 9.5    | -0.008  | 0.125 | 19.542 | 22.149 | 25.107   | 28.464 | 32.273 | 0.699 | 0.134 | 19.300 | 22.552 | 25.952   | 29.492 | 33.165 |
| 9.6    | -0.004  | 0.125 | 19.818 | 22.458 | 25.451   | 28.845 | 32.694 | 0.691 | 0.134 | 19.515 | 22.809 | 26.257   | 29.851 | 33.583 |
| 9.7    | -0.001  | 0.125 | 20.098 | 22.771 | 25.799   | 29.231 | 33.120 | 0.684 | 0.135 | 19.735 | 23.071 | 26.567   | 30.216 | 34.009 |
| 9.8    | 0.003   | 0.125 | 20.381 | 23.087 | 26.151   | 29.621 | 33.550 | 0.676 | 0.135 | 19.959 | 23.338 | 26.884   | 30.588 | 34.444 |
| 9.9    | 0.006   | 0.124 | 20.667 | 23.406 | 26.507   | 30.015 | 33.983 | 0.669 | 0.135 | 20.188 | 23.611 | 27.207   | 30.968 | 34.886 |
| 10.0   | 0.010   | 0.124 | 20.955 | 23.729 | 26.865   | 30.412 | 34.421 | 0.661 | 0.136 | 20.423 | 23.890 | 27.537   | 31.355 | 35.338 |
| 10.1   | 0.013   | 0.124 | 21.246 | 24.054 | 27.226   | 30.812 | 34.862 | 0.654 | 0.136 | 20.662 | 24.175 | 27.873   | 31.750 | 35.799 |
| 10.2   | 0.017   | 0.124 | 21.539 | 24.381 | 27.590   | 31.214 | 35.305 | 0.646 | 0.136 | 20.908 | 24.466 | 28.217   | 32.154 | 36.269 |
| 10.3   | 0.020   | 0.123 | 21.835 | 24.711 | 27.957   | 31.620 | 35.751 | 0.639 | 0.137 | 21.159 | 24.764 | 28.568   | 32.566 | 36.749 |

| Age, y | Females |       |        |        |          |        |        | Males |       |        |        |          |        |        |
|--------|---------|-------|--------|--------|----------|--------|--------|-------|-------|--------|--------|----------|--------|--------|
|        | L       | S     | -2 SD  | -1 SD  | 0 SD (M) | 1 SD   | 2 SD   | L     | S     | -2 SD  | -1 SD  | 0 SD (M) | 1 SD   | 2 SD   |
| 10.4   | 0.024   | 0.123 | 22.132 | 25.042 | 28.325   | 32.027 | 36.199 | 0.631 | 0.137 | 21.417 | 25.068 | 28.927   | 32.987 | 37.239 |
| 10.5   | 0.028   | 0.123 | 22.430 | 25.375 | 28.695   | 32.436 | 36.649 | 0.624 | 0.137 | 21.680 | 25.380 | 29.294   | 33.416 | 37.739 |
| 10.6   | 0.031   | 0.122 | 22.730 | 25.709 | 29.066   | 32.845 | 37.099 | 0.616 | 0.137 | 21.950 | 25.699 | 29.669   | 33.855 | 38.250 |
| 10.7   | 0.035   | 0.122 | 23.030 | 26.044 | 29.438   | 33.256 | 37.550 | 0.609 | 0.138 | 22.227 | 26.024 | 30.052   | 34.303 | 38.771 |
| 10.8   | 0.038   | 0.122 | 23.331 | 26.380 | 29.809   | 33.666 | 38.000 | 0.601 | 0.138 | 22.510 | 26.358 | 30.443   | 34.760 | 39.303 |
| 10.9   | 0.042   | 0.122 | 23.632 | 26.715 | 30.181   | 34.076 | 38.450 | 0.594 | 0.138 | 22.800 | 26.698 | 30.843   | 35.227 | 39.845 |
| 11.0   | 0.045   | 0.121 | 23.933 | 27.050 | 30.552   | 34.485 | 38.899 | 0.586 | 0.139 | 23.096 | 27.046 | 31.250   | 35.702 | 40.397 |
| 11.1   | 0.049   | 0.121 | 24.233 | 27.384 | 30.922   | 34.893 | 39.345 | 0.579 | 0.139 | 23.400 | 27.402 | 31.666   | 36.187 | 40.960 |
| 11.2   | 0.052   | 0.121 | 24.532 | 27.716 | 31.290   | 35.298 | 39.789 | 0.571 | 0.139 | 23.710 | 27.764 | 32.090   | 36.682 | 41.534 |
| 11.3   | 0.056   | 0.121 | 24.830 | 28.048 | 31.657   | 35.702 | 40.231 | 0.564 | 0.139 | 24.027 | 28.135 | 32.523   | 37.185 | 42.118 |
| 11.4   | 0.059   | 0.120 | 25.126 | 28.377 | 32.021   | 36.102 | 40.669 | 0.556 | 0.139 | 24.351 | 28.513 | 32.964   | 37.698 | 42.713 |
| 11.5   | 0.063   | 0.120 | 25.420 | 28.704 | 32.383   | 36.499 | 41.103 | 0.549 | 0.140 | 24.683 | 28.899 | 33.413   | 38.221 | 43.318 |
| 11.6   | 0.066   | 0.120 | 25.713 | 29.029 | 32.741   | 36.893 | 41.532 | 0.542 | 0.140 | 25.021 | 29.293 | 33.871   | 38.752 | 43.933 |
| 11.7   | 0.070   | 0.120 | 26.002 | 29.350 | 33.096   | 37.282 | 41.957 | 0.534 | 0.140 | 25.366 | 29.693 | 34.336   | 39.292 | 44.557 |
| 11.8   | 0.073   | 0.119 | 26.289 | 29.669 | 33.447   | 37.667 | 42.376 | 0.527 | 0.140 | 25.718 | 30.101 | 34.809   | 39.839 | 45.190 |
| 11.9   | 0.077   | 0.119 | 26.573 | 29.983 | 33.794   | 38.047 | 42.790 | 0.519 | 0.140 | 26.075 | 30.514 | 35.288   | 40.394 | 45.832 |
| 12.0   | 0.080   | 0.119 | 26.853 | 30.293 | 34.135   | 38.421 | 43.197 | 0.512 | 0.140 | 26.439 | 30.935 | 35.774   | 40.956 | 46.481 |
| 12.1   | 0.084   | 0.119 | 27.129 | 30.600 | 34.472   | 38.789 | 43.597 | 0.504 | 0.140 | 26.809 | 31.361 | 36.266   | 41.525 | 47.137 |
| 12.2   | 0.087   | 0.118 | 27.402 | 30.901 | 34.804   | 39.152 | 43.990 | 0.497 | 0.140 | 27.184 | 31.792 | 36.764   | 42.100 | 47.799 |
| 12.3   | 0.091   | 0.118 | 27.670 | 31.198 | 35.130   | 39.508 | 44.375 | 0.489 | 0.140 | 27.564 | 32.230 | 37.268   | 42.680 | 48.468 |
| 12.4   | 0.094   | 0.118 | 27.934 | 31.490 | 35.450   | 39.857 | 44.754 | 0.482 | 0.140 | 27.950 | 32.672 | 37.776   | 43.266 | 49.142 |
| 12.5   | 0.098   | 0.118 | 28.193 | 31.776 | 35.765   | 40.199 | 45.124 | 0.474 | 0.140 | 28.341 | 33.119 | 38.289   | 43.856 | 49.820 |
| 12.6   | 0.101   | 0.117 | 28.448 | 32.057 | 36.073   | 40.534 | 45.486 | 0.467 | 0.140 | 28.736 | 33.570 | 38.806   | 44.449 | 50.503 |
| 12.7   | 0.105   | 0.117 | 28.698 | 32.333 | 36.374   | 40.862 | 45.839 | 0.459 | 0.140 | 29.135 | 34.025 | 39.327   | 45.046 | 51.188 |
| 12.8   | 0.109   | 0.117 | 28.943 | 32.603 | 36.670   | 41.182 | 46.184 | 0.452 | 0.140 | 29.538 | 34.483 | 39.850   | 45.646 | 51.875 |
| 12.9   | 0.112   | 0.117 | 29.183 | 32.867 | 36.958   | 41.495 | 46.520 | 0.444 | 0.140 | 29.944 | 34.943 | 40.375   | 46.247 | 52.564 |
| 13.0   | 0.116   | 0.116 | 29.417 | 33.124 | 37.239   | 41.799 | 46.847 | 0.437 | 0.140 | 30.353 | 35.406 | 40.902   | 46.848 | 53.253 |
| 13.1   | 0.119   | 0.116 | 29.646 | 33.376 | 37.513   | 42.096 | 47.164 | 0.429 | 0.140 | 30.764 | 35.871 | 41.430   | 47.451 | 53.942 |
| 13.2   | 0.123   | 0.116 | 29.870 | 33.622 | 37.781   | 42.384 | 47.473 | 0.422 | 0.140 | 31.178 | 36.337 | 41.959   | 48.053 | 54.629 |
| 13.3   | 0.126   | 0.116 | 30.088 | 33.861 | 38.041   | 42.665 | 47.773 | 0.414 | 0.139 | 31.593 | 36.804 | 42.487   | 48.653 | 55.315 |
| 13.4   | 0.130   | 0.115 | 30.301 | 34.094 | 38.294   | 42.937 | 48.063 | 0.407 | 0.139 | 32.009 | 37.271 | 43.015   | 49.252 | 55.997 |
| 13.5   | 0.133   | 0.115 | 30.508 | 34.321 | 38.540   | 43.202 | 48.344 | 0.399 | 0.139 | 32.427 | 37.738 | 43.541   | 49.849 | 56.676 |
| 13.6   | 0.137   | 0.115 | 30.710 | 34.542 | 38.779   | 43.458 | 48.616 | 0.392 | 0.139 | 32.845 | 38.205 | 44.066   | 50.442 | 57.351 |
| 13.7   | 0.140   | 0.115 | 30.906 | 34.756 | 39.011   | 43.706 | 48.879 | 0.385 | 0.139 | 33.263 | 38.670 | 44.588   | 51.032 | 58.020 |
| 13.8   | 0.144   | 0.114 | 31.097 | 34.964 | 39.235   | 43.946 | 49.132 | 0.377 | 0.138 | 33.680 | 39.134 | 45.107   | 51.618 | 58.684 |
| 13.9   | 0.147   | 0.114 | 31.282 | 35.166 | 39.453   | 44.178 | 49.377 | 0.370 | 0.138 | 34.097 | 39.596 | 45.623   | 52.198 | 59.341 |
| 14.0   | 0.151   | 0.114 | 31.462 | 35.361 | 39.663   | 44.402 | 49.612 | 0.362 | 0.138 | 34.512 | 40.055 | 46.134   | 52.773 | 59.990 |
| 14.1   | 0.154   | 0.114 | 31.637 | 35.551 | 39.867   | 44.618 | 49.839 | 0.355 | 0.137 | 34.926 | 40.511 | 46.641   | 53.341 | 60.632 |
| 14.2   | 0.158   | 0.113 | 31.806 | 35.735 | 40.064   | 44.826 | 50.057 | 0.347 | 0.137 | 35.337 | 40.963 | 47.143   | 53.902 | 61.265 |
| 14.3   | 0.161   | 0.113 | 31.970 | 35.912 | 40.254   | 45.027 | 50.267 | 0.340 | 0.137 | 35.746 | 41.411 | 47.639   | 54.456 | 61.888 |
| 14.4   | 0.165   | 0.113 | 32.130 | 36.084 | 40.438   | 45.221 | 50.468 | 0.332 | 0.136 | 36.152 | 41.855 | 48.129   | 55.002 | 62.502 |
| 14.5   | 0.168   | 0.113 | 32.284 | 36.251 | 40.615   | 45.408 | 50.661 | 0.325 | 0.136 | 36.555 | 42.294 | 48.613   | 55.540 | 63.105 |
| 14.6   | 0.172   | 0.112 | 32.433 | 36.411 | 40.786   | 45.587 | 50.847 | 0.317 | 0.136 | 36.954 | 42.728 | 49.089   | 56.069 | 63.697 |
| 14.7   | 0.175   | 0.112 | 32.577 | 36.567 | 40.951   | 45.759 | 51.024 | 0.310 | 0.135 | 37.349 | 43.156 | 49.559   | 56.589 | 64.279 |
| 14.8   | 0.179   | 0.112 | 32.717 | 36.717 | 41.110   | 45.925 | 51.194 | 0.302 | 0.135 | 37.740 | 43.579 | 50.021   | 57.099 | 64.848 |
| 14.9   | 0.183   | 0.112 | 32.852 | 36.862 | 41.263   | 46.084 | 51.356 | 0.295 | 0.135 | 38.126 | 43.996 | 50.475   | 57.600 | 65.406 |
| 15.0   | 0.186   | 0.111 | 32.983 | 37.002 | 41.410   | 46.237 | 51.511 | 0.287 | 0.134 | 38.508 | 44.406 | 50.921   | 58.091 | 65.952 |
| 15.1   | 0.190   | 0.111 | 33.110 | 37.137 | 41.552   | 46.383 | 51.660 | 0.280 | 0.134 | 38.884 | 44.809 | 51.359   | 58.571 | 66.485 |
| 15.2   | 0.193   | 0.111 | 33.232 | 37.267 | 41.689   | 46.524 | 51.802 | 0.272 | 0.133 | 39.255 | 45.206 | 51.787   | 59.040 | 67.005 |
| 15.3   | 0.197   | 0.111 | 33.351 | 37.393 | 41.820   | 46.659 | 51.937 | 0.265 | 0.133 | 39.620 | 45.595 | 52.207   | 59.498 | 67.512 |
| 15.4   | 0.200   | 0.110 | 33.465 | 37.515 | 41.947   | 46.788 | 52.067 | 0.257 | 0.133 | 39.979 | 45.976 | 52.617   | 59.945 | 68.005 |
| 15.5   | 0.204   | 0.110 | 33.576 | 37.632 | 42.069   | 46.913 | 52.190 | 0.250 | 0.132 | 40.332 | 46.350 | 53.018   | 60.381 | 68.485 |
| 15.6   | 0.207   | 0.110 | 33.684 | 37.746 | 42.187   | 47.032 | 52.308 | 0.242 | 0.132 | 40.678 | 46.716 | 53.409   | 60.805 | 68.952 |
| 15.7   | 0.211   | 0.110 | 33.788 | 37.855 | 42.300   | 47.146 | 52.421 | 0.235 | 0.131 | 41.018 | 47.073 | 53.790   | 61.217 | 69.404 |
| 15.8   | 0.214   | 0.109 | 33.889 | 37.962 | 42.409   | 47.256 | 52.528 | 0.227 | 0.131 | 41.351 | 47.423 | 54.162   | 61.618 | 69.843 |
| 15.9   | 0.218   | 0.109 | 33.987 | 38.064 | 42.514   | 47.361 | 52.630 | 0.220 | 0.130 | 41.677 | 47.764 | 54.523   | 62.006 | 70.268 |
| 16.0   | 0.221   | 0.109 | 34.082 | 38.163 | 42.616   | 47.463 | 52.728 | 0.213 | 0.130 | 41.996 | 48.096 | 54.874   | 62.383 | 70.678 |
| 16.1   | 0.225   | 0.109 | 34.174 | 38.259 | 42.713   | 47.560 | 52.821 | 0.205 | 0.130 | 42.307 | 48.420 | 55.215   | 62.747 | 71.074 |
| 16.2   | 0.228   | 0.109 | 34.263 | 38.352 | 42.808   | 47.653 | 52.910 | 0.198 | 0.129 | 42.611 | 48.735 | 55.545   | 63.099 | 71.456 |
| 16.3   | 0.232   | 0.108 | 34.350 | 38.442 | 42.899   | 47.743 | 52.995 | 0.190 | 0.129 | 42.907 | 49.040 | 55.865   | 63.439 | 71.824 |
| 16.4   | 0.235   | 0.108 | 34.435 | 38.530 | 42.987   | 47.829 | 53.077 | 0.183 | 0.128 | 43.196 | 49.337 | 56.174   | 63.766 | 72.177 |
| 16.5   | 0.239   | 0.108 | 34.517 | 38.615 | 43.073   | 47.912 | 53.154 | 0.175 | 0.128 | 43.477 | 49.625 | 56.472   | 64.081 | 72.516 |
| 16.6   | 0.242   | 0.108 | 34.597 | 38.697 | 43.155   | 47.992 | 53.229 | 0.168 | 0.127 | 43.750 | 49.903 | 56.760   | 64.384 | 72.842 |
| 16.7   | 0.246   | 0.107 | 34.675 | 38.777 | 43.235   | 48.069 | 53.299 | 0.160 | 0.127 | 44.016 | 50.173 | 57.038   | 64.675 | 73.153 |
| 16.8   | 0.249   | 0.107 | 34.751 | 38.855 | 43.312   | 48.143 | 53.367 | 0.153 | 0.126 | 44.274 | 50.434 | 57.305   | 64.954 | 73.451 |
| 16.9   | 0.253   | 0.107 | 34.825 | 38.930 | 43.387   | 48.214 | 53.432 | 0.145 | 0.126 | 44.524 | 50.686 | 57.562   | 65.221 | 73.735 |
| 17.0   | 0.257   | 0.107 | 34.897 | 39.004 | 43.460   | 48.283 | 53.494 | 0.138 | 0.126 | 44.766 | 50.928 | 57.809   | 65.476 | 74.005 |
| 17.1   | 0.260   | 0.106 | 34.967 | 39.075 | 43.530   | 48.350 | 53.553 | 0.130 | 0.125 | 45.000 | 51.162 | 58.045   | 65.720 | 74.262 |
| 17.2   | 0.264   | 0.106 | 35.036 | 39.145 | 43.598   | 48.414 | 53.610 | 0.123 | 0.125 | 45.226 | 51.387 | 58.271   | 65.951 | 74.505 |
| 17.3   | 0.267   | 0.106 | 35.103 | 39.213 | 43.664   | 48.476 | 53.664 | 0.115 | 0.124 | 45.445 | 51.602 | 58.487   | 66.171 | 74.736 |

| Age, y | Females |       |        |        |          |        |        | Males  |       |        |        |          |        |        |
|--------|---------|-------|--------|--------|----------|--------|--------|--------|-------|--------|--------|----------|--------|--------|
|        | L       | S     | -2 SD  | -1 SD  | 0 SD (M) | 1 SD   | 2 SD   | L      | S     | -2 SD  | -1 SD  | 0 SD (M) | 1 SD   | 2 SD   |
| 17.4   | 0.271   | 0.106 | 35.169 | 39.279 | 43.729   | 48.535 | 53.716 | 0.108  | 0.124 | 45.656 | 51.810 | 58.693   | 66.380 | 74.953 |
| 17.5   | 0.274   | 0.106 | 35.234 | 39.344 | 43.792   | 48.593 | 53.766 | 0.100  | 0.123 | 45.859 | 52.008 | 58.889   | 66.578 | 75.158 |
| 17.6   | 0.278   | 0.105 | 35.297 | 39.407 | 43.853   | 48.649 | 53.814 | 0.093  | 0.123 | 46.055 | 52.198 | 59.075   | 66.764 | 75.351 |
| 17.7   | 0.281   | 0.105 | 35.359 | 39.469 | 43.912   | 48.703 | 53.860 | 0.085  | 0.123 | 46.243 | 52.379 | 59.252   | 66.940 | 75.531 |
| 17.8   | 0.285   | 0.105 | 35.419 | 39.529 | 43.970   | 48.756 | 53.904 | 0.078  | 0.122 | 46.423 | 52.552 | 59.419   | 67.105 | 75.699 |
| 17.9   | 0.288   | 0.105 | 35.479 | 39.588 | 44.026   | 48.807 | 53.946 | 0.070  | 0.122 | 46.597 | 52.717 | 59.577   | 67.260 | 75.855 |
| 18.0   | 0.292   | 0.104 | 35.537 | 39.646 | 44.081   | 48.856 | 53.986 | 0.063  | 0.121 | 46.762 | 52.873 | 59.726   | 67.404 | 75.999 |
| 18.1   | 0.295   | 0.104 | 35.594 | 39.703 | 44.134   | 48.904 | 54.025 | 0.056  | 0.121 | 46.921 | 53.021 | 59.865   | 67.538 | 76.133 |
| 18.2   | 0.299   | 0.104 | 35.650 | 39.758 | 44.187   | 48.950 | 54.063 | 0.048  | 0.121 | 47.072 | 53.162 | 59.996   | 67.662 | 76.255 |
| 18.3   | 0.302   | 0.104 | 35.706 | 39.813 | 44.238   | 48.995 | 54.099 | 0.041  | 0.120 | 47.217 | 53.295 | 60.119   | 67.777 | 76.367 |
| 18.4   | 0.306   | 0.104 | 35.760 | 39.866 | 44.288   | 49.039 | 54.133 | 0.033  | 0.120 | 47.355 | 53.420 | 60.233   | 67.883 | 76.468 |
| 18.5   | 0.309   | 0.103 | 35.814 | 39.919 | 44.337   | 49.082 | 54.167 | 0.026  | 0.119 | 47.486 | 53.539 | 60.340   | 67.980 | 76.560 |
| 18.6   | 0.313   | 0.103 | 35.867 | 39.970 | 44.385   | 49.124 | 54.199 | 0.018  | 0.119 | 47.612 | 53.650 | 60.439   | 68.069 | 76.643 |
| 18.7   | 0.316   | 0.103 | 35.919 | 40.021 | 44.432   | 49.165 | 54.231 | 0.011  | 0.119 | 47.731 | 53.755 | 60.530   | 68.150 | 76.716 |
| 18.8   | 0.320   | 0.103 | 35.971 | 40.072 | 44.479   | 49.205 | 54.261 | 0.003  | 0.118 | 47.844 | 53.853 | 60.615   | 68.222 | 76.781 |
| 18.9   | 0.323   | 0.102 | 36.022 | 40.121 | 44.525   | 49.244 | 54.291 | -0.004 | 0.118 | 47.951 | 53.945 | 60.693   | 68.288 | 76.838 |
| 19.0   | 0.327   | 0.102 | 36.073 | 40.170 | 44.570   | 49.283 | 54.320 | -0.012 | 0.118 | 48.053 | 54.032 | 60.764   | 68.346 | 76.887 |
| 19.1   | 0.330   | 0.102 | 36.123 | 40.219 | 44.614   | 49.321 | 54.348 | -0.019 | 0.117 | 48.150 | 54.113 | 60.830   | 68.398 | 76.929 |
| 19.2   | 0.334   | 0.102 | 36.173 | 40.267 | 44.659   | 49.358 | 54.376 | -0.027 | 0.117 | 48.242 | 54.188 | 60.889   | 68.444 | 76.964 |
| 19.3   | 0.338   | 0.102 | 36.223 | 40.315 | 44.702   | 49.395 | 54.403 | -0.034 | 0.116 | 48.329 | 54.258 | 60.944   | 68.484 | 76.993 |
| 19.4   | 0.341   | 0.101 | 36.272 | 40.362 | 44.746   | 49.431 | 54.430 | -0.042 | 0.116 | 48.412 | 54.324 | 60.993   | 68.519 | 77.017 |
| 19.5   | 0.345   | 0.101 | 36.321 | 40.409 | 44.789   | 49.468 | 54.456 | -0.049 | 0.116 | 48.491 | 54.386 | 61.038   | 68.549 | 77.035 |
| 19.6   | 0.348   | 0.101 | 36.370 | 40.456 | 44.831   | 49.504 | 54.482 | -0.057 | 0.115 | 48.566 | 54.444 | 61.079   | 68.575 | 77.049 |
| 19.7   | 0.352   | 0.101 | 36.418 | 40.503 | 44.874   | 49.539 | 54.508 | -0.064 | 0.115 | 48.638 | 54.498 | 61.117   | 68.597 | 77.058 |
| 19.8   | 0.355   | 0.100 | 36.467 | 40.550 | 44.916   | 49.575 | 54.534 | -0.072 | 0.115 | 48.706 | 54.550 | 61.151   | 68.615 | 77.064 |
| 19.9   | 0.359   | 0.100 | 36.515 | 40.596 | 44.959   | 49.610 | 54.560 | -0.079 | 0.114 | 48.772 | 54.598 | 61.182   | 68.630 | 77.067 |
| 20.0   | 0.362   | 0.100 | 36.564 | 40.643 | 45.001   | 49.646 | 54.586 | -0.087 | 0.114 | 48.835 | 54.644 | 61.210   | 68.643 | 77.067 |

**Table S30. Subtotal Lean Soft Tissue Mass, kg**

**Non-Black Children**

| Age, y | Females |       |        |        |          |        |        | Males  |       |        |        |          |        |        |
|--------|---------|-------|--------|--------|----------|--------|--------|--------|-------|--------|--------|----------|--------|--------|
|        | L       | S     | -2 SD  | -1 SD  | 0 SD (M) | 1 SD   | 2 SD   | L      | S     | -2 SD  | -1 SD  | 0 SD (M) | 1 SD   | 2 SD   |
| 5.0    | 0.346   | 0.147 | 7.882  | 9.244  | 10.751   | 12.410 | 14.227 | -0.099 | 0.140 | 8.824  | 10.119 | 11.627   | 13.385 | 15.439 |
| 5.1    | 0.343   | 0.147 | 8.023  | 9.406  | 10.938   | 12.626 | 14.476 | -0.097 | 0.140 | 8.971  | 10.289 | 11.822   | 13.609 | 15.696 |
| 5.2    | 0.339   | 0.147 | 8.163  | 9.569  | 11.126   | 12.842 | 14.724 | -0.094 | 0.140 | 9.119  | 10.459 | 12.017   | 13.833 | 15.954 |
| 5.3    | 0.336   | 0.147 | 8.303  | 9.731  | 11.313   | 13.058 | 14.972 | -0.091 | 0.140 | 9.266  | 10.628 | 12.212   | 14.058 | 16.211 |
| 5.4    | 0.332   | 0.147 | 8.444  | 9.894  | 11.501   | 13.274 | 15.220 | -0.089 | 0.140 | 9.414  | 10.799 | 12.408   | 14.282 | 16.469 |
| 5.5    | 0.329   | 0.147 | 8.585  | 10.056 | 11.688   | 13.489 | 15.468 | -0.086 | 0.140 | 9.562  | 10.969 | 12.604   | 14.507 | 16.727 |
| 5.6    | 0.325   | 0.147 | 8.725  | 10.219 | 11.876   | 13.705 | 15.716 | -0.083 | 0.140 | 9.710  | 11.140 | 12.801   | 14.733 | 16.986 |
| 5.7    | 0.322   | 0.147 | 8.866  | 10.381 | 12.063   | 13.921 | 15.963 | -0.081 | 0.140 | 9.858  | 11.311 | 12.998   | 14.959 | 17.245 |
| 5.8    | 0.318   | 0.147 | 9.007  | 10.543 | 12.250   | 14.136 | 16.211 | -0.078 | 0.140 | 10.007 | 11.483 | 13.195   | 15.186 | 17.504 |
| 5.9    | 0.315   | 0.146 | 9.147  | 10.706 | 12.437   | 14.352 | 16.459 | -0.076 | 0.140 | 10.157 | 11.654 | 13.393   | 15.413 | 17.765 |
| 6.0    | 0.311   | 0.146 | 9.288  | 10.868 | 12.625   | 14.567 | 16.706 | -0.073 | 0.140 | 10.306 | 11.827 | 13.591   | 15.641 | 18.026 |
| 6.1    | 0.308   | 0.146 | 9.429  | 11.031 | 12.812   | 14.783 | 16.954 | -0.070 | 0.140 | 10.456 | 12.000 | 13.790   | 15.869 | 18.287 |
| 6.2    | 0.304   | 0.146 | 9.570  | 11.194 | 12.999   | 14.998 | 17.202 | -0.068 | 0.140 | 10.606 | 12.173 | 13.990   | 16.098 | 18.550 |
| 6.3    | 0.301   | 0.146 | 9.712  | 11.357 | 13.187   | 15.214 | 17.450 | -0.065 | 0.140 | 10.757 | 12.347 | 14.190   | 16.328 | 18.813 |
| 6.4    | 0.297   | 0.146 | 9.854  | 11.520 | 13.375   | 15.431 | 17.699 | -0.062 | 0.140 | 10.909 | 12.522 | 14.390   | 16.558 | 19.076 |
| 6.5    | 0.294   | 0.146 | 9.996  | 11.683 | 13.563   | 15.647 | 17.947 | -0.060 | 0.140 | 11.060 | 12.697 | 14.592   | 16.790 | 19.341 |
| 6.6    | 0.290   | 0.146 | 10.138 | 11.847 | 13.752   | 15.864 | 18.197 | -0.057 | 0.140 | 11.213 | 12.872 | 14.794   | 17.022 | 19.607 |
| 6.7    | 0.287   | 0.146 | 10.281 | 12.012 | 13.941   | 16.081 | 18.447 | -0.055 | 0.140 | 11.365 | 13.049 | 14.997   | 17.254 | 19.873 |
| 6.8    | 0.283   | 0.146 | 10.424 | 12.176 | 14.130   | 16.299 | 18.697 | -0.052 | 0.140 | 11.519 | 13.226 | 15.200   | 17.488 | 20.140 |
| 6.9    | 0.280   | 0.146 | 10.568 | 12.342 | 14.321   | 16.518 | 18.949 | -0.049 | 0.140 | 11.673 | 13.403 | 15.405   | 17.722 | 20.409 |
| 7.0    | 0.276   | 0.146 | 10.713 | 12.508 | 14.512   | 16.738 | 19.202 | -0.047 | 0.140 | 11.827 | 13.581 | 15.610   | 17.958 | 20.678 |
| 7.1    | 0.273   | 0.146 | 10.858 | 12.675 | 14.704   | 16.959 | 19.456 | -0.044 | 0.140 | 11.982 | 13.760 | 15.816   | 18.194 | 20.948 |
| 7.2    | 0.269   | 0.145 | 11.005 | 12.843 | 14.897   | 17.181 | 19.712 | -0.041 | 0.140 | 12.137 | 13.939 | 16.022   | 18.431 | 21.219 |
| 7.3    | 0.265   | 0.145 | 11.152 | 13.013 | 15.092   | 17.405 | 19.969 | -0.039 | 0.140 | 12.293 | 14.119 | 16.229   | 18.668 | 21.490 |
| 7.4    | 0.262   | 0.145 | 11.301 | 13.183 | 15.288   | 17.631 | 20.228 | -0.036 | 0.140 | 12.449 | 14.300 | 16.437   | 18.906 | 21.763 |
| 7.5    | 0.258   | 0.145 | 11.451 | 13.355 | 15.485   | 17.858 | 20.489 | -0.034 | 0.140 | 12.606 | 14.481 | 16.645   | 19.145 | 22.036 |
| 7.6    | 0.255   | 0.145 | 11.602 | 13.529 | 15.685   | 18.087 | 20.753 | -0.031 | 0.140 | 12.763 | 14.662 | 16.854   | 19.385 | 22.310 |
| 7.7    | 0.251   | 0.145 | 11.755 | 13.704 | 15.886   | 18.318 | 21.019 | -0.028 | 0.140 | 12.921 | 14.844 | 17.063   | 19.625 | 22.584 |
| 7.8    | 0.248   | 0.145 | 11.909 | 13.882 | 16.090   | 18.553 | 21.289 | -0.026 | 0.140 | 13.079 | 15.027 | 17.273   | 19.866 | 22.860 |
| 7.9    | 0.244   | 0.145 | 12.066 | 14.061 | 16.296   | 18.790 | 21.561 | -0.023 | 0.140 | 13.237 | 15.210 | 17.484   | 20.108 | 23.136 |
| 8.0    | 0.241   | 0.145 | 12.225 | 14.243 | 16.505   | 19.030 | 21.838 | -0.021 | 0.140 | 13.396 | 15.394 | 17.696   | 20.351 | 23.413 |
| 8.1    | 0.237   | 0.145 | 12.386 | 14.428 | 16.717   | 19.274 | 22.118 | -0.018 | 0.140 | 13.556 | 15.578 | 17.908   | 20.594 | 23.691 |
| 8.2    | 0.234   | 0.145 | 12.549 | 14.615 | 16.933   | 19.521 | 22.403 | -0.015 | 0.140 | 13.716 | 15.763 | 18.122   | 20.839 | 23.971 |
| 8.3    | 0.230   | 0.145 | 12.716 | 14.806 | 17.151   | 19.773 | 22.692 | -0.013 | 0.140 | 13.877 | 15.950 | 18.336   | 21.085 | 24.251 |
| 8.4    | 0.227   | 0.145 | 12.885 | 15.000 | 17.374   | 20.029 | 22.987 | -0.010 | 0.140 | 14.039 | 16.137 | 18.551   | 21.332 | 24.533 |
| 8.5    | 0.223   | 0.144 | 13.058 | 15.198 | 17.601   | 20.289 | 23.286 | -0.007 | 0.140 | 14.202 | 16.325 | 18.768   | 21.580 | 24.817 |
| 8.6    | 0.220   | 0.144 | 13.233 | 15.399 | 17.832   | 20.555 | 23.592 | -0.005 | 0.140 | 14.365 | 16.514 | 18.985   | 21.829 | 25.101 |
| 8.7    | 0.216   | 0.144 | 13.412 | 15.604 | 18.067   | 20.825 | 23.903 | -0.002 | 0.140 | 14.529 | 16.704 | 19.204   | 22.080 | 25.388 |
| 8.8    | 0.213   | 0.144 | 13.595 | 15.813 | 18.308   | 21.101 | 24.221 | 0.000  | 0.140 | 14.695 | 16.895 | 19.425   | 22.333 | 25.676 |
| 8.9    | 0.209   | 0.144 | 13.781 | 16.027 | 18.553   | 21.383 | 24.545 | 0.003  | 0.140 | 14.862 | 17.088 | 19.647   | 22.588 | 25.967 |
| 9.0    | 0.206   | 0.144 | 13.972 | 16.245 | 18.803   | 21.671 | 24.875 | 0.006  | 0.139 | 15.030 | 17.283 | 19.872   | 22.845 | 26.261 |
| 9.1    | 0.202   | 0.144 | 14.166 | 16.468 | 19.059   | 21.964 | 25.213 | 0.008  | 0.139 | 15.200 | 17.480 | 20.098   | 23.105 | 26.557 |
| 9.2    | 0.199   | 0.144 | 14.365 | 16.695 | 19.320   | 22.265 | 25.559 | 0.011  | 0.139 | 15.373 | 17.679 | 20.328   | 23.368 | 26.857 |
| 9.3    | 0.195   | 0.144 | 14.568 | 16.928 | 19.587   | 22.571 | 25.912 | 0.014  | 0.139 | 15.547 | 17.881 | 20.560   | 23.634 | 27.160 |
| 9.4    | 0.192   | 0.144 | 14.776 | 17.166 | 19.859   | 22.885 | 26.272 | 0.016  | 0.139 | 15.723 | 18.085 | 20.795   | 23.903 | 27.468 |
| 9.5    | 0.188   | 0.144 | 14.987 | 17.408 | 20.138   | 23.205 | 26.640 | 0.019  | 0.139 | 15.902 | 18.292 | 21.033   | 24.176 | 27.779 |
| 9.6    | 0.185   | 0.144 | 15.204 | 17.656 | 20.422   | 23.531 | 27.016 | 0.021  | 0.139 | 16.084 | 18.502 | 21.275   | 24.454 | 28.096 |
| 9.7    | 0.181   | 0.144 | 15.425 | 17.909 | 20.712   | 23.864 | 27.399 | 0.024  | 0.139 | 16.268 | 18.716 | 21.521   | 24.736 | 28.417 |
| 9.8    | 0.178   | 0.143 | 15.650 | 18.167 | 21.008   | 24.204 | 27.790 | 0.027  | 0.139 | 16.456 | 18.933 | 21.772   | 25.023 | 28.744 |
| 9.9    | 0.174   | 0.143 | 15.879 | 18.429 | 21.309   | 24.550 | 28.188 | 0.029  | 0.139 | 16.648 | 19.155 | 22.027   | 25.315 | 29.078 |
| 10.0   | 0.171   | 0.143 | 16.113 | 18.697 | 21.616   | 24.903 | 28.594 | 0.032  | 0.139 | 16.843 | 19.381 | 22.287   | 25.614 | 29.418 |
| 10.1   | 0.167   | 0.143 | 16.351 | 18.970 | 21.929   | 25.262 | 29.008 | 0.035  | 0.139 | 17.043 | 19.612 | 22.553   | 25.918 | 29.766 |
| 10.2   | 0.164   | 0.143 | 16.594 | 19.248 | 22.247   | 25.628 | 29.429 | 0.037  | 0.139 | 17.247 | 19.848 | 22.825   | 26.230 | 30.121 |
| 10.3   | 0.160   | 0.143 | 16.841 | 19.530 | 22.571   | 26.000 | 29.857 | 0.040  | 0.139 | 17.455 | 20.090 | 23.104   | 26.549 | 30.485 |
| 10.4   | 0.157   | 0.143 | 17.091 | 19.816 | 22.899   | 26.377 | 30.291 | 0.042  | 0.139 | 17.669 | 20.337 | 23.389   | 26.876 | 30.858 |
| 10.5   | 0.153   | 0.143 | 17.345 | 20.107 | 23.232   | 26.760 | 30.731 | 0.045  | 0.139 | 17.889 | 20.591 | 23.681   | 27.211 | 31.240 |
| 10.6   | 0.149   | 0.143 | 17.602 | 20.401 | 23.569   | 27.147 | 31.177 | 0.048  | 0.139 | 18.114 | 20.852 | 23.981   | 27.555 | 31.632 |
| 10.7   | 0.146   | 0.143 | 17.862 | 20.699 | 23.911   | 27.539 | 31.628 | 0.050  | 0.139 | 18.345 | 21.119 | 24.289   | 27.908 | 32.034 |
| 10.8   | 0.142   | 0.143 | 18.126 | 20.999 | 24.255   | 27.935 | 32.083 | 0.053  | 0.139 | 18.582 | 21.393 | 24.605   | 28.270 | 32.447 |
| 10.9   | 0.139   | 0.143 | 18.391 | 21.303 | 24.603   | 28.334 | 32.543 | 0.056  | 0.139 | 18.825 | 21.675 | 24.929   | 28.641 | 32.871 |
| 11.0   | 0.135   | 0.143 | 18.659 | 21.609 | 24.954   | 28.737 | 33.007 | 0.058  | 0.139 | 19.075 | 21.964 | 25.262   | 29.023 | 33.306 |
| 11.1   | 0.132   | 0.142 | 18.929 | 21.917 | 25.307   | 29.143 | 33.473 | 0.061  | 0.139 | 19.331 | 22.261 | 25.604   | 29.415 | 33.753 |
| 11.2   | 0.128   | 0.142 | 19.200 | 22.227 | 25.662   | 29.550 | 33.943 | 0.063  | 0.139 | 19.595 | 22.566 | 25.956   | 29.818 | 34.213 |
| 11.3   | 0.125   | 0.142 | 19.473 | 22.538 | 26.018   | 29.959 | 34.413 | 0.066  | 0.139 | 19.866 | 22.880 | 26.317   | 30.231 | 34.685 |
| 11.4   | 0.121   | 0.142 | 19.746 | 22.850 | 26.375   | 30.369 | 34.885 | 0.069  | 0.139 | 20.144 | 23.202 | 26.688   | 30.656 | 35.169 |

| Age, y | Females |       |        |        |          |        |        | Males |       |        |        |          |        |        |
|--------|---------|-------|--------|--------|----------|--------|--------|-------|-------|--------|--------|----------|--------|--------|
|        | L       | S     | -2 SD  | -1 SD  | 0 SD (M) | 1 SD   | 2 SD   | L     | S     | -2 SD  | -1 SD  | 0 SD (M) | 1 SD   | 2 SD   |
| 11.5   | 0.118   | 0.142 | 20.019 | 23.162 | 26.732   | 30.779 | 35.357 | 0.071 | 0.139 | 20.430 | 23.533 | 27.069   | 31.093 | 35.667 |
| 11.6   | 0.114   | 0.142 | 20.293 | 23.474 | 27.089   | 31.188 | 35.828 | 0.074 | 0.139 | 20.723 | 23.872 | 27.459   | 31.541 | 36.178 |
| 11.7   | 0.111   | 0.142 | 20.565 | 23.784 | 27.444   | 31.597 | 36.298 | 0.076 | 0.139 | 21.023 | 24.220 | 27.860   | 32.000 | 36.701 |
| 11.8   | 0.107   | 0.142 | 20.837 | 24.094 | 27.798   | 32.003 | 36.766 | 0.079 | 0.139 | 21.331 | 24.576 | 28.270   | 32.470 | 37.237 |
| 11.9   | 0.104   | 0.142 | 21.107 | 24.402 | 28.150   | 32.407 | 37.231 | 0.082 | 0.139 | 21.645 | 24.940 | 28.689   | 32.950 | 37.785 |
| 12.0   | 0.100   | 0.142 | 21.376 | 24.708 | 28.500   | 32.808 | 37.693 | 0.084 | 0.139 | 21.966 | 25.312 | 29.118   | 33.441 | 38.345 |
| 12.1   | 0.097   | 0.142 | 21.642 | 25.011 | 28.846   | 33.205 | 38.151 | 0.087 | 0.139 | 22.295 | 25.692 | 29.555   | 33.943 | 38.917 |
| 12.2   | 0.093   | 0.142 | 21.905 | 25.311 | 29.189   | 33.598 | 38.604 | 0.090 | 0.139 | 22.630 | 26.080 | 30.002   | 34.455 | 39.501 |
| 12.3   | 0.090   | 0.142 | 22.166 | 25.607 | 29.527   | 33.987 | 39.051 | 0.092 | 0.139 | 22.971 | 26.475 | 30.457   | 34.976 | 40.096 |
| 12.4   | 0.086   | 0.141 | 22.424 | 25.900 | 29.861   | 34.370 | 39.492 | 0.095 | 0.139 | 23.319 | 26.878 | 30.921   | 35.508 | 40.702 |
| 12.5   | 0.083   | 0.141 | 22.677 | 26.188 | 30.190   | 34.747 | 39.927 | 0.097 | 0.139 | 23.672 | 27.287 | 31.393   | 36.048 | 41.318 |
| 12.6   | 0.079   | 0.141 | 22.927 | 26.471 | 30.514   | 35.118 | 40.354 | 0.100 | 0.139 | 24.031 | 27.703 | 31.872   | 36.597 | 41.944 |
| 12.7   | 0.076   | 0.141 | 23.172 | 26.749 | 30.831   | 35.481 | 40.773 | 0.103 | 0.139 | 24.396 | 28.125 | 32.358   | 37.154 | 42.578 |
| 12.8   | 0.072   | 0.141 | 23.413 | 27.022 | 31.142   | 35.838 | 41.184 | 0.105 | 0.139 | 24.764 | 28.552 | 32.850   | 37.718 | 43.221 |
| 12.9   | 0.069   | 0.141 | 23.649 | 27.289 | 31.446   | 36.186 | 41.586 | 0.108 | 0.139 | 25.137 | 28.984 | 33.348   | 38.288 | 43.871 |
| 13.0   | 0.065   | 0.141 | 23.879 | 27.550 | 31.743   | 36.527 | 41.978 | 0.111 | 0.139 | 25.514 | 29.421 | 33.850   | 38.864 | 44.527 |
| 13.1   | 0.062   | 0.141 | 24.104 | 27.805 | 32.033   | 36.859 | 42.361 | 0.113 | 0.139 | 25.894 | 29.861 | 34.358   | 39.445 | 45.189 |
| 13.2   | 0.058   | 0.141 | 24.324 | 28.053 | 32.315   | 37.183 | 42.734 | 0.116 | 0.139 | 26.277 | 30.305 | 34.869   | 40.030 | 45.856 |
| 13.3   | 0.055   | 0.141 | 24.539 | 28.295 | 32.591   | 37.498 | 43.098 | 0.118 | 0.139 | 26.662 | 30.751 | 35.383   | 40.619 | 46.527 |
| 13.4   | 0.051   | 0.141 | 24.747 | 28.530 | 32.858   | 37.804 | 43.451 | 0.121 | 0.139 | 27.049 | 31.200 | 35.900   | 41.212 | 47.202 |
| 13.5   | 0.048   | 0.141 | 24.950 | 28.759 | 33.117   | 38.101 | 43.793 | 0.124 | 0.139 | 27.438 | 31.650 | 36.419   | 41.806 | 47.878 |
| 13.6   | 0.044   | 0.141 | 25.146 | 28.980 | 33.369   | 38.388 | 44.125 | 0.126 | 0.139 | 27.827 | 32.101 | 36.938   | 42.401 | 48.556 |
| 13.7   | 0.041   | 0.140 | 25.337 | 29.194 | 33.611   | 38.666 | 44.446 | 0.129 | 0.139 | 28.216 | 32.552 | 37.458   | 42.996 | 49.234 |
| 13.8   | 0.037   | 0.140 | 25.521 | 29.401 | 33.846   | 38.935 | 44.756 | 0.132 | 0.139 | 28.604 | 33.003 | 37.977   | 43.591 | 49.911 |
| 13.9   | 0.034   | 0.140 | 25.700 | 29.601 | 34.073   | 39.194 | 45.055 | 0.134 | 0.139 | 28.992 | 33.452 | 38.495   | 44.184 | 50.586 |
| 14.0   | 0.030   | 0.140 | 25.872 | 29.795 | 34.291   | 39.444 | 45.344 | 0.137 | 0.139 | 29.378 | 33.900 | 39.011   | 44.774 | 51.258 |
| 14.1   | 0.026   | 0.140 | 26.038 | 29.981 | 34.502   | 39.684 | 45.622 | 0.139 | 0.139 | 29.761 | 34.345 | 39.524   | 45.361 | 51.925 |
| 14.2   | 0.023   | 0.140 | 26.199 | 30.160 | 34.704   | 39.916 | 45.889 | 0.142 | 0.139 | 30.142 | 34.787 | 40.033   | 45.944 | 52.588 |
| 14.3   | 0.019   | 0.140 | 26.353 | 30.332 | 34.899   | 40.138 | 46.146 | 0.145 | 0.139 | 30.519 | 35.224 | 40.537   | 46.521 | 53.245 |
| 14.4   | 0.016   | 0.140 | 26.502 | 30.498 | 35.086   | 40.351 | 46.392 | 0.147 | 0.139 | 30.892 | 35.658 | 41.037   | 47.093 | 53.895 |
| 14.5   | 0.012   | 0.140 | 26.645 | 30.657 | 35.264   | 40.555 | 46.628 | 0.150 | 0.139 | 31.261 | 36.087 | 41.531   | 47.659 | 54.538 |
| 14.6   | 0.009   | 0.140 | 26.782 | 30.809 | 35.436   | 40.750 | 46.854 | 0.153 | 0.139 | 31.626 | 36.510 | 42.019   | 48.217 | 55.173 |
| 14.7   | 0.005   | 0.140 | 26.913 | 30.954 | 35.599   | 40.937 | 47.069 | 0.155 | 0.139 | 31.985 | 36.928 | 42.500   | 48.768 | 55.799 |
| 14.8   | 0.002   | 0.140 | 27.039 | 31.094 | 35.755   | 41.114 | 47.275 | 0.158 | 0.139 | 32.339 | 37.339 | 42.974   | 49.310 | 56.415 |
| 14.9   | -0.002  | 0.140 | 27.159 | 31.226 | 35.904   | 41.284 | 47.472 | 0.160 | 0.139 | 32.687 | 37.743 | 43.440   | 49.843 | 57.020 |
| 15.0   | -0.005  | 0.140 | 27.274 | 31.353 | 36.046   | 41.446 | 47.659 | 0.163 | 0.139 | 33.028 | 38.140 | 43.898   | 50.367 | 57.615 |
| 15.1   | -0.009  | 0.139 | 27.384 | 31.474 | 36.181   | 41.599 | 47.836 | 0.166 | 0.139 | 33.363 | 38.529 | 44.347   | 50.880 | 58.197 |
| 15.2   | -0.012  | 0.139 | 27.489 | 31.589 | 36.309   | 41.745 | 48.005 | 0.168 | 0.139 | 33.690 | 38.910 | 44.786   | 51.382 | 58.767 |
| 15.3   | -0.016  | 0.139 | 27.588 | 31.698 | 36.431   | 41.883 | 48.165 | 0.171 | 0.139 | 34.010 | 39.283 | 45.216   | 51.873 | 59.324 |
| 15.4   | -0.019  | 0.139 | 27.683 | 31.801 | 36.546   | 42.013 | 48.317 | 0.173 | 0.139 | 34.323 | 39.647 | 45.636   | 52.353 | 59.868 |
| 15.5   | -0.023  | 0.139 | 27.774 | 31.900 | 36.655   | 42.137 | 48.460 | 0.176 | 0.139 | 34.628 | 40.002 | 46.045   | 52.822 | 60.399 |
| 15.6   | -0.026  | 0.139 | 27.859 | 31.993 | 36.757   | 42.253 | 48.596 | 0.179 | 0.139 | 34.925 | 40.349 | 46.445   | 53.279 | 60.917 |
| 15.7   | -0.030  | 0.139 | 27.941 | 32.081 | 36.855   | 42.363 | 48.724 | 0.181 | 0.139 | 35.215 | 40.687 | 46.835   | 53.724 | 61.421 |
| 15.8   | -0.033  | 0.139 | 28.018 | 32.164 | 36.946   | 42.467 | 48.844 | 0.184 | 0.139 | 35.497 | 41.015 | 47.214   | 54.157 | 61.912 |
| 15.9   | -0.037  | 0.139 | 28.091 | 32.242 | 37.032   | 42.564 | 48.958 | 0.187 | 0.139 | 35.771 | 41.335 | 47.583   | 54.579 | 62.389 |
| 16.0   | -0.040  | 0.139 | 28.161 | 32.316 | 37.113   | 42.656 | 49.064 | 0.189 | 0.139 | 36.037 | 41.645 | 47.941   | 54.988 | 62.851 |
| 16.1   | -0.044  | 0.139 | 28.226 | 32.386 | 37.190   | 42.742 | 49.164 | 0.192 | 0.139 | 36.295 | 41.946 | 48.289   | 55.384 | 63.300 |
| 16.2   | -0.047  | 0.139 | 28.289 | 32.452 | 37.261   | 42.822 | 49.259 | 0.194 | 0.139 | 36.545 | 42.238 | 48.625   | 55.769 | 63.734 |
| 16.3   | -0.051  | 0.139 | 28.348 | 32.514 | 37.328   | 42.898 | 49.347 | 0.197 | 0.139 | 36.786 | 42.521 | 48.951   | 56.141 | 64.155 |
| 16.4   | -0.054  | 0.139 | 28.403 | 32.572 | 37.391   | 42.968 | 49.429 | 0.200 | 0.139 | 37.020 | 42.794 | 49.267   | 56.501 | 64.562 |
| 16.5   | -0.058  | 0.138 | 28.456 | 32.627 | 37.450   | 43.034 | 49.507 | 0.202 | 0.139 | 37.247 | 43.059 | 49.573   | 56.850 | 64.955 |
| 16.6   | -0.061  | 0.138 | 28.506 | 32.678 | 37.505   | 43.096 | 49.579 | 0.205 | 0.139 | 37.465 | 43.315 | 49.869   | 57.187 | 65.335 |
| 16.7   | -0.065  | 0.138 | 28.553 | 32.727 | 37.557   | 43.154 | 49.647 | 0.208 | 0.139 | 37.676 | 43.562 | 50.154   | 57.513 | 65.702 |
| 16.8   | -0.068  | 0.138 | 28.597 | 32.772 | 37.605   | 43.207 | 49.710 | 0.210 | 0.139 | 37.880 | 43.801 | 50.430   | 57.827 | 66.056 |
| 16.9   | -0.072  | 0.138 | 28.639 | 32.815 | 37.650   | 43.257 | 49.769 | 0.213 | 0.139 | 38.077 | 44.032 | 50.696   | 58.131 | 66.398 |
| 17.0   | -0.075  | 0.138 | 28.679 | 32.855 | 37.693   | 43.304 | 49.824 | 0.215 | 0.139 | 38.266 | 44.254 | 50.953   | 58.423 | 66.727 |
| 17.1   | -0.079  | 0.138 | 28.717 | 32.893 | 37.732   | 43.348 | 49.876 | 0.218 | 0.139 | 38.448 | 44.468 | 51.201   | 58.705 | 67.044 |
| 17.2   | -0.082  | 0.138 | 28.753 | 32.929 | 37.769   | 43.389 | 49.924 | 0.221 | 0.139 | 38.624 | 44.674 | 51.439   | 58.977 | 67.349 |
| 17.3   | -0.086  | 0.138 | 28.787 | 32.963 | 37.804   | 43.426 | 49.969 | 0.223 | 0.139 | 38.793 | 44.873 | 51.669   | 59.239 | 67.643 |
| 17.4   | -0.090  | 0.138 | 28.820 | 32.994 | 37.836   | 43.462 | 50.011 | 0.226 | 0.139 | 38.956 | 45.065 | 51.891   | 59.491 | 67.925 |
| 17.5   | -0.093  | 0.138 | 28.851 | 33.024 | 37.866   | 43.495 | 50.051 | 0.229 | 0.139 | 39.112 | 45.249 | 52.104   | 59.733 | 68.197 |
| 17.6   | -0.097  | 0.138 | 28.880 | 33.052 | 37.894   | 43.525 | 50.087 | 0.231 | 0.139 | 39.262 | 45.427 | 52.309   | 59.967 | 68.458 |
| 17.7   | -0.100  | 0.138 | 28.908 | 33.078 | 37.921   | 43.554 | 50.121 | 0.234 | 0.139 | 39.407 | 45.597 | 52.507   | 60.191 | 68.709 |
| 17.8   | -0.104  | 0.137 | 28.934 | 33.103 | 37.945   | 43.580 | 50.153 | 0.236 | 0.139 | 39.546 | 45.762 | 52.697   | 60.407 | 68.951 |
| 17.9   | -0.107  | 0.137 | 28.960 | 33.127 | 37.968   | 43.605 | 50.183 | 0.239 | 0.139 | 39.680 | 45.920 | 52.880   | 60.615 | 69.183 |
| 18.0   | -0.111  | 0.137 | 28.984 | 33.149 | 37.990   | 43.628 | 50.211 | 0.242 | 0.139 | 39.808 | 46.072 | 53.056   | 60.815 | 69.406 |
| 18.1   | -0.114  | 0.137 | 29.007 | 33.170 | 38.010   | 43.649 | 50.237 | 0.244 | 0.139 | 39.932 | 46.218 | 53.226   | 61.007 | 69.620 |
| 18.2   | -0.118  | 0.137 | 29.029 | 33.190 | 38.028   | 43.669 | 50.261 | 0.247 | 0.139 | 40.051 | 46.359 | 53.389   | 61.193 | 69.826 |



| Age, y | Females |       |        |        |          |        |        | Males |       |        |        |          |        |        |
|--------|---------|-------|--------|--------|----------|--------|--------|-------|-------|--------|--------|----------|--------|--------|
|        | L       | S     | -2 SD  | -1 SD  | 0 SD (M) | 1 SD   | 2 SD   | L     | S     | -2 SD  | -1 SD  | 0 SD (M) | 1 SD   | 2 SD   |
| 18.3   | -0.121  | 0.137 | 29.050 | 33.209 | 38.046   | 43.687 | 50.284 | 0.250 | 0.139 | 40.165 | 46.495 | 53.546   | 61.371 | 70.024 |
| 18.4   | -0.125  | 0.137 | 29.071 | 33.226 | 38.062   | 43.705 | 50.305 | 0.252 | 0.139 | 40.275 | 46.626 | 53.698   | 61.543 | 70.215 |
| 18.5   | -0.128  | 0.137 | 29.090 | 33.243 | 38.078   | 43.720 | 50.324 | 0.255 | 0.139 | 40.381 | 46.752 | 53.844   | 61.708 | 70.398 |
| 18.6   | -0.132  | 0.137 | 29.109 | 33.259 | 38.092   | 43.735 | 50.343 | 0.257 | 0.139 | 40.483 | 46.874 | 53.985   | 61.868 | 70.575 |
| 18.7   | -0.135  | 0.137 | 29.127 | 33.274 | 38.106   | 43.749 | 50.360 | 0.260 | 0.139 | 40.581 | 46.991 | 54.121   | 62.022 | 70.746 |
| 18.8   | -0.139  | 0.137 | 29.144 | 33.289 | 38.118   | 43.762 | 50.376 | 0.263 | 0.139 | 40.676 | 47.105 | 54.253   | 62.171 | 70.910 |
| 18.9   | -0.142  | 0.137 | 29.161 | 33.303 | 38.130   | 43.773 | 50.391 | 0.265 | 0.139 | 40.768 | 47.214 | 54.380   | 62.315 | 71.069 |
| 19.0   | -0.146  | 0.137 | 29.177 | 33.316 | 38.141   | 43.784 | 50.405 | 0.268 | 0.139 | 40.856 | 47.321 | 54.504   | 62.455 | 71.223 |
| 19.1   | -0.149  | 0.137 | 29.193 | 33.328 | 38.152   | 43.794 | 50.418 | 0.270 | 0.139 | 40.942 | 47.424 | 54.624   | 62.590 | 71.372 |
| 19.2   | -0.153  | 0.136 | 29.208 | 33.340 | 38.161   | 43.804 | 50.430 | 0.273 | 0.139 | 41.026 | 47.524 | 54.740   | 62.721 | 71.516 |
| 19.3   | -0.156  | 0.136 | 29.223 | 33.352 | 38.170   | 43.813 | 50.442 | 0.276 | 0.139 | 41.106 | 47.621 | 54.853   | 62.849 | 71.656 |
| 19.4   | -0.160  | 0.136 | 29.237 | 33.363 | 38.179   | 43.821 | 50.453 | 0.278 | 0.139 | 41.185 | 47.716 | 54.963   | 62.973 | 71.792 |
| 19.5   | -0.163  | 0.136 | 29.251 | 33.373 | 38.187   | 43.828 | 50.463 | 0.281 | 0.139 | 41.261 | 47.808 | 55.070   | 63.093 | 71.925 |
| 19.6   | -0.167  | 0.136 | 29.264 | 33.383 | 38.195   | 43.835 | 50.472 | 0.284 | 0.139 | 41.336 | 47.898 | 55.175   | 63.211 | 72.054 |
| 19.7   | -0.170  | 0.136 | 29.277 | 33.393 | 38.202   | 43.842 | 50.481 | 0.286 | 0.139 | 41.408 | 47.986 | 55.277   | 63.326 | 72.180 |
| 19.8   | -0.174  | 0.136 | 29.290 | 33.402 | 38.209   | 43.848 | 50.489 | 0.289 | 0.139 | 41.480 | 48.072 | 55.377   | 63.439 | 72.303 |
| 19.9   | -0.177  | 0.136 | 29.303 | 33.411 | 38.215   | 43.853 | 50.497 | 0.291 | 0.139 | 41.549 | 48.156 | 55.475   | 63.550 | 72.423 |
| 20.0   | -0.181  | 0.136 | 29.315 | 33.420 | 38.221   | 43.859 | 50.504 | 0.294 | 0.139 | 41.618 | 48.239 | 55.572   | 63.658 | 72.542 |

**Black Children**

| Age, y | Females |       |        |        |          |        |        | Males |       |        |        |          |        |        |
|--------|---------|-------|--------|--------|----------|--------|--------|-------|-------|--------|--------|----------|--------|--------|
|        | L       | S     | -2 SD  | -1 SD  | 0 SD (M) | 1 SD   | 2 SD   | L     | S     | -2 SD  | -1 SD  | 0 SD (M) | 1 SD   | 2 SD   |
| 5.0    | -0.159  | 0.152 | 7.897  | 9.144  | 10.626   | 12.393 | 14.509 | 0.947 | 0.127 | 9.281  | 10.833 | 12.396   | 13.970 | 15.554 |
| 5.1    | -0.154  | 0.152 | 8.086  | 9.362  | 10.878   | 12.683 | 14.843 | 0.941 | 0.127 | 9.445  | 11.028 | 12.625   | 14.234 | 15.853 |
| 5.2    | -0.150  | 0.152 | 8.274  | 9.580  | 11.129   | 12.973 | 15.177 | 0.934 | 0.127 | 9.608  | 11.223 | 12.853   | 14.497 | 16.154 |
| 5.3    | -0.145  | 0.151 | 8.463  | 9.798  | 11.381   | 13.263 | 15.511 | 0.928 | 0.128 | 9.772  | 11.418 | 13.082   | 14.761 | 16.455 |
| 5.4    | -0.141  | 0.151 | 8.652  | 10.017 | 11.633   | 13.554 | 15.845 | 0.921 | 0.128 | 9.935  | 11.613 | 13.311   | 15.026 | 16.756 |
| 5.5    | -0.137  | 0.151 | 8.841  | 10.235 | 11.885   | 13.844 | 16.178 | 0.914 | 0.129 | 10.098 | 11.808 | 13.540   | 15.290 | 17.058 |
| 5.6    | -0.132  | 0.151 | 9.030  | 10.454 | 12.138   | 14.135 | 16.512 | 0.908 | 0.129 | 10.261 | 12.003 | 13.769   | 15.555 | 17.361 |
| 5.7    | -0.128  | 0.151 | 9.220  | 10.673 | 12.390   | 14.425 | 16.845 | 0.901 | 0.129 | 10.424 | 12.198 | 13.998   | 15.821 | 17.665 |
| 5.8    | -0.123  | 0.150 | 9.410  | 10.893 | 12.643   | 14.716 | 17.179 | 0.894 | 0.130 | 10.586 | 12.392 | 14.227   | 16.086 | 17.969 |
| 5.9    | -0.119  | 0.150 | 9.600  | 11.113 | 12.897   | 15.007 | 17.512 | 0.888 | 0.130 | 10.749 | 12.587 | 14.456   | 16.352 | 18.274 |
| 6.0    | -0.115  | 0.150 | 9.791  | 11.333 | 13.150   | 15.299 | 17.846 | 0.881 | 0.131 | 10.911 | 12.781 | 14.685   | 16.618 | 18.579 |
| 6.1    | -0.110  | 0.150 | 9.982  | 11.554 | 13.405   | 15.591 | 18.180 | 0.875 | 0.131 | 11.073 | 12.975 | 14.914   | 16.885 | 18.885 |
| 6.2    | -0.106  | 0.150 | 10.174 | 11.775 | 13.660   | 15.883 | 18.515 | 0.868 | 0.132 | 11.234 | 13.169 | 15.143   | 17.151 | 19.191 |
| 6.3    | -0.101  | 0.149 | 10.366 | 11.997 | 13.915   | 16.177 | 18.850 | 0.861 | 0.132 | 11.396 | 13.363 | 15.372   | 17.418 | 19.498 |
| 6.4    | -0.097  | 0.149 | 10.559 | 12.220 | 14.172   | 16.471 | 19.185 | 0.855 | 0.132 | 11.557 | 13.557 | 15.601   | 17.685 | 19.806 |
| 6.5    | -0.093  | 0.149 | 10.753 | 12.443 | 14.429   | 16.765 | 19.522 | 0.848 | 0.133 | 11.717 | 13.750 | 15.830   | 17.952 | 20.113 |
| 6.6    | -0.088  | 0.149 | 10.947 | 12.668 | 14.687   | 17.061 | 19.859 | 0.841 | 0.133 | 11.878 | 13.943 | 16.059   | 18.219 | 20.422 |
| 6.7    | -0.084  | 0.149 | 11.143 | 12.893 | 14.946   | 17.358 | 20.197 | 0.835 | 0.134 | 12.038 | 14.136 | 16.287   | 18.487 | 20.730 |
| 6.8    | -0.079  | 0.148 | 11.339 | 13.120 | 15.206   | 17.656 | 20.536 | 0.828 | 0.134 | 12.197 | 14.329 | 16.516   | 18.754 | 21.039 |
| 6.9    | -0.075  | 0.148 | 11.536 | 13.347 | 15.468   | 17.955 | 20.876 | 0.822 | 0.134 | 12.357 | 14.521 | 16.744   | 19.021 | 21.348 |
| 7.0    | -0.071  | 0.148 | 11.735 | 13.576 | 15.731   | 18.255 | 21.218 | 0.815 | 0.135 | 12.516 | 14.713 | 16.972   | 19.288 | 21.658 |
| 7.1    | -0.066  | 0.148 | 11.935 | 13.807 | 15.995   | 18.557 | 21.561 | 0.808 | 0.135 | 12.676 | 14.905 | 17.200   | 19.556 | 21.968 |
| 7.2    | -0.062  | 0.148 | 12.136 | 14.038 | 16.261   | 18.860 | 21.906 | 0.802 | 0.136 | 12.835 | 15.097 | 17.429   | 19.825 | 22.279 |
| 7.3    | -0.058  | 0.147 | 12.338 | 14.271 | 16.528   | 19.166 | 22.252 | 0.795 | 0.136 | 12.994 | 15.289 | 17.658   | 20.094 | 22.591 |
| 7.4    | -0.053  | 0.147 | 12.542 | 14.506 | 16.797   | 19.473 | 22.600 | 0.788 | 0.136 | 13.154 | 15.482 | 17.887   | 20.363 | 22.904 |
| 7.5    | -0.049  | 0.147 | 12.747 | 14.743 | 17.068   | 19.781 | 22.950 | 0.782 | 0.137 | 13.313 | 15.675 | 18.117   | 20.634 | 23.219 |
| 7.6    | -0.044  | 0.147 | 12.955 | 14.981 | 17.341   | 20.092 | 23.302 | 0.775 | 0.137 | 13.474 | 15.869 | 18.348   | 20.905 | 23.535 |
| 7.7    | -0.040  | 0.147 | 13.164 | 15.222 | 17.616   | 20.405 | 23.656 | 0.769 | 0.138 | 13.634 | 16.063 | 18.579   | 21.178 | 23.852 |
| 7.8    | -0.036  | 0.146 | 13.374 | 15.464 | 17.894   | 20.721 | 24.013 | 0.762 | 0.138 | 13.796 | 16.258 | 18.812   | 21.452 | 24.171 |
| 7.9    | -0.031  | 0.146 | 13.587 | 15.708 | 18.173   | 21.038 | 24.371 | 0.755 | 0.139 | 13.958 | 16.453 | 19.045   | 21.727 | 24.492 |
| 8.0    | -0.027  | 0.146 | 13.802 | 15.955 | 18.454   | 21.358 | 24.732 | 0.749 | 0.139 | 14.121 | 16.650 | 19.281   | 22.004 | 24.816 |
| 8.1    | -0.022  | 0.146 | 14.018 | 16.203 | 18.738   | 21.679 | 25.094 | 0.742 | 0.139 | 14.285 | 16.849 | 19.517   | 22.284 | 25.142 |
| 8.2    | -0.018  | 0.145 | 14.237 | 16.454 | 19.024   | 22.004 | 25.460 | 0.736 | 0.140 | 14.451 | 17.049 | 19.756   | 22.566 | 25.471 |
| 8.3    | -0.014  | 0.145 | 14.457 | 16.707 | 19.312   | 22.330 | 25.827 | 0.729 | 0.140 | 14.618 | 17.251 | 19.997   | 22.850 | 25.803 |
| 8.4    | -0.009  | 0.145 | 14.680 | 16.962 | 19.603   | 22.659 | 26.197 | 0.722 | 0.140 | 14.787 | 17.455 | 20.241   | 23.138 | 26.140 |
| 8.5    | -0.005  | 0.145 | 14.905 | 17.220 | 19.896   | 22.990 | 26.569 | 0.716 | 0.141 | 14.958 | 17.661 | 20.487   | 23.429 | 26.480 |
| 8.6    | 0.000   | 0.144 | 15.132 | 17.480 | 20.192   | 23.324 | 26.943 | 0.709 | 0.141 | 15.132 | 17.870 | 20.736   | 23.723 | 26.824 |
| 8.7    | 0.004   | 0.144 | 15.362 | 17.742 | 20.489   | 23.660 | 27.319 | 0.702 | 0.142 | 15.307 | 18.081 | 20.989   | 24.021 | 27.173 |
| 8.8    | 0.008   | 0.144 | 15.594 | 18.007 | 20.790   | 23.999 | 27.698 | 0.696 | 0.142 | 15.485 | 18.296 | 21.245   | 24.324 | 27.526 |
| 8.9    | 0.013   | 0.143 | 15.827 | 18.274 | 21.092   | 24.339 | 28.079 | 0.689 | 0.142 | 15.666 | 18.514 | 21.504   | 24.631 | 27.885 |
| 9.0    | 0.017   | 0.143 | 16.064 | 18.543 | 21.397   | 24.682 | 28.461 | 0.683 | 0.143 | 15.850 | 18.735 | 21.768   | 24.942 | 28.250 |
| 9.1    | 0.022   | 0.143 | 16.302 | 18.814 | 21.704   | 25.026 | 28.845 | 0.676 | 0.143 | 16.038 | 18.960 | 22.036   | 25.259 | 28.620 |
| 9.2    | 0.026   | 0.142 | 16.542 | 19.088 | 22.013   | 25.373 | 29.231 | 0.669 | 0.143 | 16.229 | 19.189 | 22.309   | 25.581 | 28.997 |
| 9.3    | 0.030   | 0.142 | 16.785 | 19.363 | 22.324   | 25.722 | 29.619 | 0.663 | 0.144 | 16.423 | 19.422 | 22.587   | 25.908 | 29.381 |
| 9.4    | 0.035   | 0.142 | 17.029 | 19.641 | 22.637   | 26.072 | 30.008 | 0.656 | 0.144 | 16.621 | 19.660 | 22.869   | 26.242 | 29.771 |
| 9.5    | 0.039   | 0.141 | 17.276 | 19.921 | 22.952   | 26.424 | 30.398 | 0.649 | 0.144 | 16.824 | 19.902 | 23.158   | 26.582 | 30.169 |

| Age, y | Females |       |        |        |          |        |        | Males |       |        |        |          |        |        |
|--------|---------|-------|--------|--------|----------|--------|--------|-------|-------|--------|--------|----------|--------|--------|
|        | L       | S     | -2 SD  | -1 SD  | 0 SD (M) | 1 SD   | 2 SD   | L     | S     | -2 SD  | -1 SD  | 0 SD (M) | 1 SD   | 2 SD   |
| 9.6    | 0.044   | 0.141 | 17.525 | 20.203 | 23.269   | 26.778 | 30.790 | 0.643 | 0.145 | 17.031 | 20.150 | 23.451   | 26.929 | 30.574 |
| 9.7    | 0.048   | 0.140 | 17.775 | 20.486 | 23.588   | 27.133 | 31.182 | 0.636 | 0.145 | 17.242 | 20.402 | 23.751   | 27.282 | 30.988 |
| 9.8    | 0.052   | 0.140 | 18.028 | 20.771 | 23.907   | 27.489 | 31.574 | 0.630 | 0.145 | 17.458 | 20.660 | 24.057   | 27.643 | 31.409 |
| 9.9    | 0.057   | 0.140 | 18.282 | 21.058 | 24.229   | 27.845 | 31.968 | 0.623 | 0.145 | 17.679 | 20.923 | 24.370   | 28.011 | 31.840 |
| 10.0   | 0.061   | 0.139 | 18.538 | 21.346 | 24.551   | 28.203 | 32.361 | 0.616 | 0.146 | 17.905 | 21.193 | 24.689   | 28.387 | 32.279 |
| 10.1   | 0.066   | 0.139 | 18.795 | 21.636 | 24.874   | 28.561 | 32.754 | 0.610 | 0.146 | 18.136 | 21.468 | 25.015   | 28.770 | 32.727 |
| 10.2   | 0.070   | 0.138 | 19.053 | 21.926 | 25.198   | 28.919 | 33.146 | 0.603 | 0.146 | 18.373 | 21.750 | 25.348   | 29.162 | 33.185 |
| 10.3   | 0.074   | 0.138 | 19.313 | 22.218 | 25.523   | 29.278 | 33.539 | 0.596 | 0.146 | 18.616 | 22.038 | 25.689   | 29.562 | 33.652 |
| 10.4   | 0.079   | 0.137 | 19.574 | 22.511 | 25.848   | 29.636 | 33.930 | 0.590 | 0.147 | 18.865 | 22.333 | 26.037   | 29.971 | 34.130 |
| 10.5   | 0.083   | 0.137 | 19.836 | 22.804 | 26.173   | 29.994 | 34.320 | 0.583 | 0.147 | 19.120 | 22.635 | 26.393   | 30.389 | 34.618 |
| 10.6   | 0.087   | 0.137 | 20.099 | 23.097 | 26.499   | 30.351 | 34.708 | 0.577 | 0.147 | 19.381 | 22.943 | 26.757   | 30.816 | 35.116 |
| 10.7   | 0.092   | 0.136 | 20.363 | 23.391 | 26.824   | 30.707 | 35.095 | 0.570 | 0.147 | 19.648 | 23.259 | 27.129   | 31.253 | 35.624 |
| 10.8   | 0.096   | 0.136 | 20.627 | 23.685 | 27.148   | 31.062 | 35.479 | 0.563 | 0.148 | 19.922 | 23.582 | 27.509   | 31.698 | 36.143 |
| 10.9   | 0.101   | 0.135 | 20.891 | 23.979 | 27.472   | 31.416 | 35.861 | 0.557 | 0.148 | 20.202 | 23.913 | 27.898   | 32.153 | 36.673 |
| 11.0   | 0.105   | 0.135 | 21.155 | 24.272 | 27.795   | 31.767 | 36.241 | 0.550 | 0.148 | 20.489 | 24.250 | 28.294   | 32.616 | 37.213 |
| 11.1   | 0.109   | 0.134 | 21.419 | 24.565 | 28.116   | 32.117 | 36.617 | 0.544 | 0.148 | 20.783 | 24.595 | 28.699   | 33.089 | 37.763 |
| 11.2   | 0.114   | 0.133 | 21.684 | 24.857 | 28.436   | 32.465 | 36.991 | 0.537 | 0.148 | 21.083 | 24.948 | 29.112   | 33.572 | 38.324 |
| 11.3   | 0.118   | 0.133 | 21.947 | 25.149 | 28.755   | 32.810 | 37.361 | 0.530 | 0.148 | 21.390 | 25.308 | 29.533   | 34.063 | 38.896 |
| 11.4   | 0.123   | 0.132 | 22.210 | 25.439 | 29.072   | 33.152 | 37.727 | 0.524 | 0.148 | 21.704 | 25.675 | 29.963   | 34.564 | 39.478 |
| 11.5   | 0.127   | 0.132 | 22.473 | 25.727 | 29.386   | 33.491 | 38.089 | 0.517 | 0.148 | 22.025 | 26.050 | 30.401   | 35.074 | 40.070 |
| 11.6   | 0.131   | 0.131 | 22.734 | 26.014 | 29.698   | 33.828 | 38.446 | 0.510 | 0.148 | 22.353 | 26.433 | 30.846   | 35.593 | 40.672 |
| 11.7   | 0.136   | 0.131 | 22.994 | 26.299 | 30.008   | 34.160 | 38.800 | 0.504 | 0.149 | 22.687 | 26.822 | 31.300   | 36.120 | 41.283 |
| 11.8   | 0.140   | 0.130 | 23.252 | 26.583 | 30.315   | 34.489 | 39.149 | 0.497 | 0.149 | 23.028 | 27.218 | 31.761   | 36.655 | 41.903 |
| 11.9   | 0.145   | 0.130 | 23.509 | 26.863 | 30.619   | 34.814 | 39.492 | 0.491 | 0.149 | 23.375 | 27.621 | 32.228   | 37.198 | 42.531 |
| 12.0   | 0.149   | 0.129 | 23.764 | 27.142 | 30.919   | 35.135 | 39.831 | 0.484 | 0.149 | 23.727 | 28.029 | 32.702   | 37.747 | 43.167 |
| 12.1   | 0.153   | 0.128 | 24.018 | 27.418 | 31.217   | 35.452 | 40.164 | 0.477 | 0.149 | 24.085 | 28.444 | 33.182   | 38.303 | 43.810 |
| 12.2   | 0.158   | 0.128 | 24.269 | 27.691 | 31.510   | 35.764 | 40.492 | 0.471 | 0.149 | 24.449 | 28.864 | 33.668   | 38.865 | 44.459 |
| 12.3   | 0.162   | 0.127 | 24.517 | 27.961 | 31.800   | 36.072 | 40.815 | 0.464 | 0.148 | 24.818 | 29.289 | 34.159   | 39.432 | 45.114 |
| 12.4   | 0.167   | 0.127 | 24.763 | 28.227 | 32.086   | 36.375 | 41.131 | 0.457 | 0.148 | 25.192 | 29.719 | 34.655   | 40.005 | 45.774 |
| 12.5   | 0.171   | 0.126 | 25.007 | 28.491 | 32.368   | 36.673 | 41.442 | 0.451 | 0.148 | 25.571 | 30.154 | 35.156   | 40.582 | 46.438 |
| 12.6   | 0.175   | 0.126 | 25.247 | 28.751 | 32.646   | 36.966 | 41.747 | 0.444 | 0.148 | 25.954 | 30.593 | 35.660   | 41.162 | 47.106 |
| 12.7   | 0.180   | 0.125 | 25.485 | 29.007 | 32.920   | 37.254 | 42.046 | 0.438 | 0.148 | 26.341 | 31.036 | 36.168   | 41.746 | 47.777 |
| 12.8   | 0.184   | 0.125 | 25.720 | 29.260 | 33.189   | 37.537 | 42.339 | 0.431 | 0.148 | 26.731 | 31.481 | 36.678   | 42.332 | 48.450 |
| 12.9   | 0.189   | 0.124 | 25.951 | 29.509 | 33.453   | 37.814 | 42.626 | 0.424 | 0.148 | 27.125 | 31.930 | 37.191   | 42.919 | 49.124 |
| 13.0   | 0.193   | 0.123 | 26.179 | 29.754 | 33.713   | 38.086 | 42.907 | 0.418 | 0.148 | 27.522 | 32.381 | 37.705   | 43.507 | 49.799 |
| 13.1   | 0.197   | 0.123 | 26.403 | 29.994 | 33.968   | 38.353 | 43.181 | 0.411 | 0.147 | 27.921 | 32.833 | 38.220   | 44.096 | 50.473 |
| 13.2   | 0.202   | 0.122 | 26.624 | 30.231 | 34.218   | 38.613 | 43.449 | 0.404 | 0.147 | 28.322 | 33.287 | 38.736   | 44.684 | 51.145 |
| 13.3   | 0.206   | 0.122 | 26.841 | 30.463 | 34.463   | 38.869 | 43.711 | 0.398 | 0.147 | 28.725 | 33.741 | 39.252   | 45.272 | 51.816 |
| 13.4   | 0.210   | 0.121 | 27.054 | 30.691 | 34.703   | 39.119 | 43.966 | 0.391 | 0.147 | 29.129 | 34.196 | 39.767   | 45.857 | 52.484 |
| 13.5   | 0.215   | 0.121 | 27.263 | 30.914 | 34.939   | 39.363 | 44.216 | 0.385 | 0.146 | 29.534 | 34.651 | 40.280   | 46.440 | 53.148 |
| 13.6   | 0.219   | 0.120 | 27.469 | 31.133 | 35.169   | 39.601 | 44.459 | 0.378 | 0.146 | 29.939 | 35.105 | 40.792   | 47.020 | 53.807 |
| 13.7   | 0.224   | 0.120 | 27.670 | 31.348 | 35.394   | 39.835 | 44.696 | 0.371 | 0.146 | 30.345 | 35.559 | 41.302   | 47.596 | 54.462 |
| 13.8   | 0.228   | 0.119 | 27.867 | 31.558 | 35.614   | 40.062 | 44.927 | 0.365 | 0.145 | 30.750 | 36.010 | 41.809   | 48.168 | 55.110 |
| 13.9   | 0.232   | 0.119 | 28.061 | 31.763 | 35.829   | 40.284 | 45.151 | 0.358 | 0.145 | 31.154 | 36.460 | 42.312   | 48.735 | 55.752 |
| 14.0   | 0.237   | 0.118 | 28.250 | 31.964 | 36.039   | 40.500 | 45.370 | 0.351 | 0.145 | 31.558 | 36.907 | 42.811   | 49.296 | 56.387 |
| 14.1   | 0.241   | 0.118 | 28.434 | 32.160 | 36.244   | 40.711 | 45.583 | 0.345 | 0.144 | 31.959 | 37.351 | 43.306   | 49.851 | 57.013 |
| 14.2   | 0.246   | 0.117 | 28.615 | 32.351 | 36.444   | 40.916 | 45.790 | 0.338 | 0.144 | 32.359 | 37.791 | 43.796   | 50.400 | 57.631 |
| 14.3   | 0.250   | 0.117 | 28.791 | 32.538 | 36.639   | 41.116 | 45.991 | 0.332 | 0.143 | 32.756 | 38.228 | 44.280   | 50.940 | 58.239 |
| 14.4   | 0.254   | 0.117 | 28.963 | 32.720 | 36.829   | 41.311 | 46.187 | 0.325 | 0.143 | 33.150 | 38.660 | 44.758   | 51.473 | 58.838 |
| 14.5   | 0.259   | 0.116 | 29.131 | 32.898 | 37.014   | 41.500 | 46.377 | 0.318 | 0.143 | 33.541 | 39.088 | 45.229   | 51.998 | 59.426 |
| 14.6   | 0.263   | 0.116 | 29.295 | 33.072 | 37.195   | 41.685 | 46.562 | 0.312 | 0.142 | 33.928 | 39.510 | 45.694   | 52.514 | 60.003 |
| 14.7   | 0.268   | 0.115 | 29.455 | 33.240 | 37.370   | 41.864 | 46.742 | 0.305 | 0.142 | 34.312 | 39.928 | 46.152   | 53.021 | 60.570 |
| 14.8   | 0.272   | 0.115 | 29.610 | 33.405 | 37.541   | 42.039 | 46.916 | 0.299 | 0.141 | 34.691 | 40.339 | 46.603   | 53.519 | 61.125 |
| 14.9   | 0.276   | 0.115 | 29.762 | 33.565 | 37.707   | 42.208 | 47.085 | 0.292 | 0.141 | 35.067 | 40.745 | 47.046   | 54.007 | 61.668 |
| 15.0   | 0.281   | 0.114 | 29.909 | 33.720 | 37.869   | 42.373 | 47.250 | 0.285 | 0.140 | 35.437 | 41.144 | 47.481   | 54.485 | 62.199 |
| 15.1   | 0.285   | 0.114 | 30.052 | 33.872 | 38.026   | 42.533 | 47.410 | 0.279 | 0.140 | 35.802 | 41.537 | 47.907   | 54.953 | 62.717 |
| 15.2   | 0.290   | 0.113 | 30.192 | 34.019 | 38.179   | 42.689 | 47.565 | 0.272 | 0.139 | 36.162 | 41.923 | 48.325   | 55.410 | 63.222 |
| 15.3   | 0.294   | 0.113 | 30.327 | 34.162 | 38.328   | 42.840 | 47.715 | 0.265 | 0.139 | 36.517 | 42.302 | 48.733   | 55.856 | 63.715 |
| 15.4   | 0.298   | 0.113 | 30.459 | 34.302 | 38.473   | 42.988 | 47.862 | 0.259 | 0.138 | 36.865 | 42.673 | 49.133   | 56.291 | 64.194 |
| 15.5   | 0.303   | 0.113 | 30.586 | 34.437 | 38.613   | 43.131 | 48.004 | 0.252 | 0.138 | 37.208 | 43.037 | 49.523   | 56.715 | 64.659 |
| 15.6   | 0.307   | 0.112 | 30.710 | 34.569 | 38.750   | 43.270 | 48.142 | 0.246 | 0.137 | 37.544 | 43.393 | 49.904   | 57.127 | 65.111 |
| 15.7   | 0.312   | 0.112 | 30.831 | 34.696 | 38.883   | 43.405 | 48.277 | 0.239 | 0.137 | 37.874 | 43.741 | 50.276   | 57.528 | 65.550 |
| 15.8   | 0.316   | 0.112 | 30.948 | 34.820 | 39.012   | 43.537 | 48.407 | 0.232 | 0.136 | 38.197 | 44.081 | 50.637   | 57.917 | 65.975 |
| 15.9   | 0.320   | 0.111 | 31.061 | 34.941 | 39.138   | 43.664 | 48.534 | 0.226 | 0.136 | 38.514 | 44.413 | 50.989   | 58.294 | 66.385 |
| 16.0   | 0.325   | 0.111 | 31.171 | 35.058 | 39.260   | 43.789 | 48.658 | 0.219 | 0.135 | 38.823 | 44.736 | 51.330   | 58.660 | 66.782 |
| 16.1   | 0.329   | 0.111 | 31.278 | 35.172 | 39.378   | 43.910 | 48.779 | 0.212 | 0.135 | 39.125 | 45.051 | 51.661   | 59.013 | 67.165 |
| 16.2   | 0.334   | 0.111 | 31.382 | 35.283 | 39.494   | 44.028 | 48.896 | 0.206 | 0.134 | 39.420 | 45.357 | 51.982   | 59.354 | 67.534 |
| 16.3   | 0.338   | 0.110 | 31.482 | 35.390 | 39.606   | 44.142 | 49.010 | 0.199 | 0.134 | 39.708 | 45.654 | 52.293   | 59.684 | 67.888 |

| Age, y | Females |       |        |        |          |        |        | Males  |       |        |        |          |        |        |
|--------|---------|-------|--------|--------|----------|--------|--------|--------|-------|--------|--------|----------|--------|--------|
|        | L       | S     | -2 SD  | -1 SD  | 0 SD (M) | 1 SD   | 2 SD   | L      | S     | -2 SD  | -1 SD  | 0 SD (M) | 1 SD   | 2 SD   |
| 16.4   | 0.342   | 0.110 | 31.579 | 35.494 | 39.716   | 44.254 | 49.121 | 0.193  | 0.133 | 39.988 | 45.943 | 52.593   | 60.001 | 68.229 |
| 16.5   | 0.347   | 0.110 | 31.674 | 35.596 | 39.822   | 44.363 | 49.230 | 0.186  | 0.133 | 40.261 | 46.222 | 52.883   | 60.306 | 68.555 |
| 16.6   | 0.351   | 0.110 | 31.765 | 35.694 | 39.926   | 44.469 | 49.336 | 0.179  | 0.132 | 40.526 | 46.493 | 53.163   | 60.599 | 68.868 |
| 16.7   | 0.355   | 0.110 | 31.854 | 35.790 | 40.026   | 44.573 | 49.440 | 0.173  | 0.132 | 40.783 | 46.755 | 53.433   | 60.881 | 69.167 |
| 16.8   | 0.360   | 0.110 | 31.940 | 35.883 | 40.125   | 44.674 | 49.541 | 0.166  | 0.131 | 41.034 | 47.009 | 53.692   | 61.150 | 69.453 |
| 16.9   | 0.364   | 0.109 | 32.024 | 35.974 | 40.220   | 44.773 | 49.639 | 0.159  | 0.131 | 41.276 | 47.253 | 53.941   | 61.408 | 69.725 |
| 17.0   | 0.369   | 0.109 | 32.105 | 36.062 | 40.314   | 44.869 | 49.736 | 0.153  | 0.131 | 41.511 | 47.489 | 54.180   | 61.654 | 69.984 |
| 17.1   | 0.373   | 0.109 | 32.184 | 36.148 | 40.405   | 44.963 | 49.831 | 0.146  | 0.130 | 41.738 | 47.716 | 54.409   | 61.889 | 70.229 |
| 17.2   | 0.377   | 0.109 | 32.260 | 36.231 | 40.493   | 45.055 | 49.923 | 0.140  | 0.130 | 41.958 | 47.934 | 54.628   | 62.112 | 70.462 |
| 17.3   | 0.382   | 0.109 | 32.334 | 36.312 | 40.580   | 45.145 | 50.014 | 0.133  | 0.129 | 42.170 | 48.144 | 54.838   | 62.324 | 70.681 |
| 17.4   | 0.386   | 0.109 | 32.406 | 36.391 | 40.665   | 45.232 | 50.102 | 0.126  | 0.129 | 42.374 | 48.345 | 55.037   | 62.525 | 70.888 |
| 17.5   | 0.391   | 0.109 | 32.476 | 36.469 | 40.747   | 45.319 | 50.189 | 0.120  | 0.128 | 42.572 | 48.537 | 55.227   | 62.715 | 71.083 |
| 17.6   | 0.395   | 0.108 | 32.543 | 36.544 | 40.828   | 45.403 | 50.275 | 0.113  | 0.128 | 42.761 | 48.721 | 55.407   | 62.894 | 71.265 |
| 17.7   | 0.399   | 0.108 | 32.609 | 36.617 | 40.907   | 45.485 | 50.359 | 0.107  | 0.127 | 42.944 | 48.897 | 55.578   | 63.063 | 71.435 |
| 17.8   | 0.404   | 0.108 | 32.673 | 36.688 | 40.984   | 45.566 | 50.441 | 0.100  | 0.127 | 43.119 | 49.065 | 55.740   | 63.221 | 71.594 |
| 17.9   | 0.408   | 0.108 | 32.736 | 36.758 | 41.060   | 45.646 | 50.522 | 0.093  | 0.126 | 43.287 | 49.225 | 55.893   | 63.369 | 71.741 |
| 18.0   | 0.413   | 0.108 | 32.796 | 36.826 | 41.134   | 45.724 | 50.601 | 0.087  | 0.126 | 43.448 | 49.377 | 56.036   | 63.507 | 71.877 |
| 18.1   | 0.417   | 0.108 | 32.855 | 36.893 | 41.206   | 45.800 | 50.680 | 0.080  | 0.125 | 43.602 | 49.521 | 56.171   | 63.635 | 72.001 |
| 18.2   | 0.421   | 0.108 | 32.913 | 36.958 | 41.278   | 45.876 | 50.757 | 0.073  | 0.125 | 43.749 | 49.657 | 56.298   | 63.753 | 72.115 |
| 18.3   | 0.426   | 0.108 | 32.969 | 37.022 | 41.348   | 45.950 | 50.833 | 0.067  | 0.124 | 43.889 | 49.786 | 56.416   | 63.863 | 72.219 |
| 18.4   | 0.430   | 0.108 | 33.023 | 37.085 | 41.416   | 46.023 | 50.908 | 0.060  | 0.124 | 44.023 | 49.908 | 56.526   | 63.963 | 72.313 |
| 18.5   | 0.435   | 0.108 | 33.077 | 37.146 | 41.484   | 46.095 | 50.982 | 0.054  | 0.124 | 44.150 | 50.023 | 56.629   | 64.056 | 72.397 |
| 18.6   | 0.439   | 0.108 | 33.129 | 37.206 | 41.550   | 46.165 | 51.055 | 0.047  | 0.123 | 44.272 | 50.131 | 56.724   | 64.140 | 72.473 |
| 18.7   | 0.443   | 0.108 | 33.180 | 37.265 | 41.616   | 46.235 | 51.127 | 0.040  | 0.123 | 44.388 | 50.233 | 56.813   | 64.216 | 72.540 |
| 18.8   | 0.448   | 0.108 | 33.230 | 37.323 | 41.680   | 46.304 | 51.198 | 0.034  | 0.122 | 44.498 | 50.328 | 56.894   | 64.284 | 72.598 |
| 18.9   | 0.452   | 0.108 | 33.279 | 37.380 | 41.744   | 46.372 | 51.269 | 0.027  | 0.122 | 44.602 | 50.418 | 56.969   | 64.346 | 72.649 |
| 19.0   | 0.457   | 0.108 | 33.327 | 37.436 | 41.806   | 46.440 | 51.339 | 0.020  | 0.122 | 44.701 | 50.502 | 57.038   | 64.400 | 72.692 |
| 19.1   | 0.461   | 0.108 | 33.375 | 37.492 | 41.868   | 46.506 | 51.408 | 0.014  | 0.121 | 44.795 | 50.580 | 57.101   | 64.449 | 72.728 |
| 19.2   | 0.465   | 0.108 | 33.421 | 37.547 | 41.930   | 46.572 | 51.476 | 0.007  | 0.121 | 44.885 | 50.654 | 57.158   | 64.491 | 72.757 |
| 19.3   | 0.470   | 0.108 | 33.467 | 37.601 | 41.990   | 46.638 | 51.544 | 0.001  | 0.120 | 44.970 | 50.722 | 57.210   | 64.528 | 72.781 |
| 19.4   | 0.474   | 0.108 | 33.512 | 37.654 | 42.050   | 46.702 | 51.612 | -0.006 | 0.120 | 45.050 | 50.787 | 57.258   | 64.560 | 72.799 |
| 19.5   | 0.478   | 0.108 | 33.557 | 37.707 | 42.110   | 46.767 | 51.679 | -0.013 | 0.120 | 45.127 | 50.847 | 57.301   | 64.587 | 72.812 |
| 19.6   | 0.483   | 0.108 | 33.601 | 37.759 | 42.169   | 46.830 | 51.745 | -0.019 | 0.119 | 45.201 | 50.903 | 57.341   | 64.610 | 72.821 |
| 19.7   | 0.487   | 0.108 | 33.645 | 37.811 | 42.227   | 46.894 | 51.811 | -0.026 | 0.119 | 45.271 | 50.956 | 57.377   | 64.630 | 72.826 |
| 19.8   | 0.492   | 0.108 | 33.688 | 37.863 | 42.286   | 46.957 | 51.877 | -0.033 | 0.118 | 45.338 | 51.006 | 57.409   | 64.646 | 72.828 |
| 19.9   | 0.496   | 0.108 | 33.731 | 37.914 | 42.343   | 47.020 | 51.943 | -0.039 | 0.118 | 45.402 | 51.053 | 57.439   | 64.659 | 72.826 |
| 20.0   | 0.500   | 0.108 | 33.774 | 37.965 | 42.401   | 47.082 | 52.008 | -0.046 | 0.118 | 45.464 | 51.098 | 57.467   | 64.670 | 72.823 |

**Table S31. Appendicular Lean Soft Tissue Mass, kg**

| Non-Black Children |         |       |       |        |          |        |        |       |       |       |        |          |        |        |
|--------------------|---------|-------|-------|--------|----------|--------|--------|-------|-------|-------|--------|----------|--------|--------|
| Age, y             | Females |       |       |        |          |        |        | Males |       |       |        |          |        |        |
|                    | L       | S     | -2 SD | -1 SD  | 0 SD (M) | 1 SD   | 2 SD   | L     | S     | -2 SD | -1 SD  | 0 SD (M) | 1 SD   | 2 SD   |
| 5.0                | 0.640   | 0.159 | 3.226 | 3.892  | 4.603    | 5.354  | 6.146  | 0.164 | 0.137 | 3.860 | 4.450  | 5.114    | 5.859  | 6.692  |
| 5.1                | 0.634   | 0.159 | 3.298 | 3.978  | 4.703    | 5.471  | 6.281  | 0.165 | 0.138 | 3.933 | 4.536  | 5.214    | 5.975  | 6.826  |
| 5.2                | 0.628   | 0.159 | 3.370 | 4.063  | 4.803    | 5.588  | 6.416  | 0.167 | 0.138 | 4.007 | 4.622  | 5.315    | 6.091  | 6.960  |
| 5.3                | 0.622   | 0.159 | 3.443 | 4.148  | 4.903    | 5.704  | 6.551  | 0.168 | 0.138 | 4.081 | 4.709  | 5.415    | 6.208  | 7.095  |
| 5.4                | 0.616   | 0.159 | 3.515 | 4.234  | 5.003    | 5.821  | 6.685  | 0.169 | 0.138 | 4.154 | 4.795  | 5.516    | 6.325  | 7.230  |
| 5.5                | 0.610   | 0.159 | 3.587 | 4.320  | 5.104    | 5.938  | 6.821  | 0.170 | 0.139 | 4.228 | 4.882  | 5.617    | 6.442  | 7.365  |
| 5.6                | 0.603   | 0.159 | 3.660 | 4.405  | 5.204    | 6.055  | 6.956  | 0.172 | 0.139 | 4.302 | 4.969  | 5.718    | 6.559  | 7.501  |
| 5.7                | 0.597   | 0.158 | 3.733 | 4.491  | 5.305    | 6.172  | 7.091  | 0.173 | 0.139 | 4.376 | 5.056  | 5.820    | 6.677  | 7.637  |
| 5.8                | 0.591   | 0.158 | 3.806 | 4.577  | 5.405    | 6.289  | 7.227  | 0.174 | 0.139 | 4.451 | 5.143  | 5.922    | 6.796  | 7.774  |
| 5.9                | 0.585   | 0.158 | 3.879 | 4.663  | 5.506    | 6.406  | 7.363  | 0.176 | 0.140 | 4.525 | 5.230  | 6.024    | 6.915  | 7.911  |
| 6.0                | 0.579   | 0.158 | 3.952 | 4.749  | 5.607    | 6.524  | 7.499  | 0.177 | 0.140 | 4.600 | 5.318  | 6.127    | 7.034  | 8.049  |
| 6.1                | 0.573   | 0.158 | 4.026 | 4.836  | 5.708    | 6.642  | 7.635  | 0.178 | 0.140 | 4.674 | 5.406  | 6.230    | 7.154  | 8.188  |
| 6.2                | 0.567   | 0.158 | 4.100 | 4.923  | 5.810    | 6.760  | 7.772  | 0.180 | 0.140 | 4.749 | 5.495  | 6.333    | 7.274  | 8.327  |
| 6.3                | 0.560   | 0.158 | 4.174 | 5.010  | 5.912    | 6.879  | 7.910  | 0.181 | 0.140 | 4.825 | 5.583  | 6.437    | 7.395  | 8.467  |
| 6.4                | 0.554   | 0.158 | 4.248 | 5.097  | 6.014    | 6.998  | 8.048  | 0.182 | 0.141 | 4.900 | 5.672  | 6.541    | 7.516  | 8.607  |
| 6.5                | 0.548   | 0.158 | 4.323 | 5.185  | 6.117    | 7.117  | 8.186  | 0.184 | 0.141 | 4.976 | 5.761  | 6.646    | 7.638  | 8.748  |
| 6.6                | 0.542   | 0.158 | 4.399 | 5.273  | 6.220    | 7.237  | 8.325  | 0.185 | 0.141 | 5.051 | 5.851  | 6.751    | 7.760  | 8.890  |
| 6.7                | 0.536   | 0.158 | 4.474 | 5.362  | 6.323    | 7.358  | 8.465  | 0.186 | 0.141 | 5.127 | 5.941  | 6.856    | 7.883  | 9.032  |
| 6.8                | 0.530   | 0.158 | 4.550 | 5.451  | 6.428    | 7.480  | 8.606  | 0.187 | 0.142 | 5.203 | 6.031  | 6.962    | 8.006  | 9.175  |
| 6.9                | 0.523   | 0.158 | 4.627 | 5.541  | 6.532    | 7.602  | 8.748  | 0.189 | 0.142 | 5.280 | 6.121  | 7.068    | 8.130  | 9.318  |
| 7.0                | 0.517   | 0.158 | 4.704 | 5.631  | 6.638    | 7.725  | 8.891  | 0.190 | 0.142 | 5.356 | 6.212  | 7.174    | 8.254  | 9.463  |
| 7.1                | 0.511   | 0.158 | 4.782 | 5.722  | 6.744    | 7.848  | 9.034  | 0.191 | 0.142 | 5.433 | 6.302  | 7.281    | 8.379  | 9.607  |
| 7.2                | 0.505   | 0.158 | 4.861 | 5.814  | 6.851    | 7.973  | 9.179  | 0.193 | 0.143 | 5.510 | 6.394  | 7.388    | 8.504  | 9.753  |
| 7.3                | 0.499   | 0.158 | 4.940 | 5.906  | 6.959    | 8.099  | 9.325  | 0.194 | 0.143 | 5.587 | 6.485  | 7.496    | 8.630  | 9.899  |
| 7.4                | 0.493   | 0.157 | 5.020 | 6.000  | 7.068    | 8.226  | 9.472  | 0.195 | 0.143 | 5.664 | 6.577  | 7.604    | 8.756  | 10.045 |
| 7.5                | 0.486   | 0.157 | 5.101 | 6.094  | 7.178    | 8.354  | 9.621  | 0.197 | 0.143 | 5.742 | 6.668  | 7.712    | 8.883  | 10.193 |
| 7.6                | 0.480   | 0.157 | 5.182 | 6.189  | 7.289    | 8.483  | 9.771  | 0.198 | 0.144 | 5.819 | 6.761  | 7.821    | 9.010  | 10.340 |
| 7.7                | 0.474   | 0.157 | 5.265 | 6.285  | 7.401    | 8.614  | 9.923  | 0.199 | 0.144 | 5.897 | 6.853  | 7.930    | 9.137  | 10.489 |
| 7.8                | 0.468   | 0.157 | 5.348 | 6.382  | 7.515    | 8.746  | 10.077 | 0.201 | 0.144 | 5.974 | 6.946  | 8.039    | 9.265  | 10.637 |
| 7.9                | 0.462   | 0.157 | 5.432 | 6.481  | 7.629    | 8.879  | 10.232 | 0.202 | 0.144 | 6.053 | 7.038  | 8.148    | 9.394  | 10.787 |
| 8.0                | 0.456   | 0.157 | 5.517 | 6.580  | 7.745    | 9.014  | 10.388 | 0.203 | 0.145 | 6.131 | 7.132  | 8.259    | 9.523  | 10.938 |
| 8.1                | 0.450   | 0.157 | 5.604 | 6.680  | 7.862    | 9.151  | 10.547 | 0.204 | 0.145 | 6.209 | 7.225  | 8.369    | 9.653  | 11.089 |
| 8.2                | 0.443   | 0.157 | 5.691 | 6.782  | 7.981    | 9.289  | 10.708 | 0.206 | 0.145 | 6.288 | 7.320  | 8.481    | 9.784  | 11.241 |
| 8.3                | 0.437   | 0.157 | 5.780 | 6.885  | 8.101    | 9.429  | 10.871 | 0.207 | 0.145 | 6.368 | 7.414  | 8.593    | 9.915  | 11.394 |
| 8.4                | 0.431   | 0.157 | 5.870 | 6.990  | 8.223    | 9.571  | 11.036 | 0.208 | 0.146 | 6.448 | 7.510  | 8.706    | 10.048 | 11.549 |
| 8.5                | 0.425   | 0.157 | 5.961 | 7.096  | 8.346    | 9.714  | 11.203 | 0.210 | 0.146 | 6.528 | 7.606  | 8.819    | 10.181 | 11.704 |
| 8.6                | 0.419   | 0.157 | 6.053 | 7.203  | 8.471    | 9.860  | 11.373 | 0.211 | 0.146 | 6.609 | 7.702  | 8.934    | 10.316 | 11.861 |
| 8.7                | 0.413   | 0.157 | 6.147 | 7.312  | 8.598    | 10.007 | 11.544 | 0.212 | 0.146 | 6.690 | 7.800  | 9.049    | 10.451 | 12.019 |
| 8.8                | 0.406   | 0.157 | 6.241 | 7.422  | 8.726    | 10.157 | 11.719 | 0.214 | 0.147 | 6.773 | 7.898  | 9.166    | 10.588 | 12.179 |
| 8.9                | 0.400   | 0.157 | 6.338 | 7.534  | 8.856    | 10.308 | 11.895 | 0.215 | 0.147 | 6.856 | 7.997  | 9.284    | 10.727 | 12.340 |
| 9.0                | 0.394   | 0.157 | 6.435 | 7.647  | 8.988    | 10.462 | 12.074 | 0.216 | 0.147 | 6.939 | 8.098  | 9.403    | 10.867 | 12.504 |
| 9.1                | 0.388   | 0.156 | 6.534 | 7.762  | 9.121    | 10.618 | 12.255 | 0.218 | 0.147 | 7.024 | 8.200  | 9.523    | 11.009 | 12.669 |
| 9.2                | 0.382   | 0.156 | 6.634 | 7.878  | 9.257    | 10.775 | 12.439 | 0.219 | 0.147 | 7.110 | 8.303  | 9.645    | 11.152 | 12.837 |
| 9.3                | 0.376   | 0.156 | 6.736 | 7.996  | 9.394    | 10.935 | 12.625 | 0.220 | 0.148 | 7.198 | 8.407  | 9.769    | 11.298 | 13.007 |
| 9.4                | 0.369   | 0.156 | 6.839 | 8.115  | 9.533    | 11.097 | 12.814 | 0.221 | 0.148 | 7.286 | 8.513  | 9.895    | 11.446 | 13.180 |
| 9.5                | 0.363   | 0.156 | 6.943 | 8.236  | 9.674    | 11.261 | 13.005 | 0.223 | 0.148 | 7.376 | 8.621  | 10.023   | 11.597 | 13.356 |
| 9.6                | 0.357   | 0.156 | 7.049 | 8.359  | 9.816    | 11.427 | 13.198 | 0.224 | 0.148 | 7.467 | 8.730  | 10.153   | 11.750 | 13.534 |
| 9.7                | 0.351   | 0.156 | 7.155 | 8.483  | 9.960    | 11.595 | 13.394 | 0.225 | 0.149 | 7.560 | 8.842  | 10.286   | 11.905 | 13.716 |
| 9.8                | 0.345   | 0.156 | 7.264 | 8.608  | 10.105   | 11.764 | 13.592 | 0.227 | 0.149 | 7.655 | 8.956  | 10.420   | 12.064 | 13.902 |
| 9.9                | 0.339   | 0.156 | 7.373 | 8.734  | 10.252   | 11.935 | 13.792 | 0.228 | 0.149 | 7.752 | 9.071  | 10.558   | 12.226 | 14.090 |
| 10.0               | 0.333   | 0.156 | 7.483 | 8.862  | 10.401   | 12.108 | 13.994 | 0.229 | 0.149 | 7.851 | 9.190  | 10.698   | 12.391 | 14.283 |
| 10.1               | 0.326   | 0.156 | 7.595 | 8.991  | 10.551   | 12.283 | 14.198 | 0.231 | 0.150 | 7.951 | 9.311  | 10.842   | 12.560 | 14.480 |
| 10.2               | 0.320   | 0.156 | 7.707 | 9.121  | 10.702   | 12.459 | 14.403 | 0.232 | 0.150 | 8.055 | 9.434  | 10.988   | 12.732 | 14.681 |
| 10.3               | 0.314   | 0.156 | 7.821 | 9.252  | 10.854   | 12.637 | 14.611 | 0.233 | 0.150 | 8.160 | 9.561  | 11.138   | 12.909 | 14.887 |
| 10.4               | 0.308   | 0.156 | 7.935 | 9.384  | 11.008   | 12.816 | 14.820 | 0.235 | 0.150 | 8.268 | 9.690  | 11.292   | 13.089 | 15.098 |
| 10.5               | 0.302   | 0.156 | 8.050 | 9.517  | 11.162   | 12.996 | 15.030 | 0.236 | 0.150 | 8.379 | 9.823  | 11.449   | 13.274 | 15.313 |
| 10.6               | 0.296   | 0.156 | 8.166 | 9.651  | 11.317   | 13.176 | 15.241 | 0.237 | 0.151 | 8.492 | 9.959  | 11.610   | 13.463 | 15.534 |
| 10.7               | 0.289   | 0.156 | 8.282 | 9.785  | 11.473   | 13.358 | 15.453 | 0.238 | 0.151 | 8.609 | 10.098 | 11.775   | 13.657 | 15.760 |
| 10.8               | 0.283   | 0.155 | 8.399 | 9.920  | 11.629   | 13.540 | 15.666 | 0.240 | 0.151 | 8.728 | 10.241 | 11.944   | 13.856 | 15.991 |
| 10.9               | 0.277   | 0.155 | 8.516 | 10.055 | 11.786   | 13.723 | 15.880 | 0.241 | 0.151 | 8.850 | 10.387 | 12.118   | 14.059 | 16.228 |
| 11.0               | 0.271   | 0.155 | 8.633 | 10.190 | 11.943   | 13.906 | 16.094 | 0.242 | 0.151 | 8.976 | 10.537 | 12.295   | 14.267 | 16.470 |
| 11.1               | 0.265   | 0.155 | 8.750 | 10.325 | 12.100   | 14.088 | 16.308 | 0.244 | 0.152 | 9.104 | 10.690 | 12.477   | 14.481 | 16.719 |
| 11.2               | 0.259   | 0.155 | 8.868 | 10.461 | 12.256   | 14.271 | 16.521 | 0.245 | 0.152 | 9.236 | 10.848 | 12.663   | 14.699 | 16.973 |
| 11.3               | 0.253   | 0.155 | 8.985 | 10.596 | 12.413   | 14.453 | 16.735 | 0.246 | 0.152 | 9.371 | 11.009 | 12.854   | 14.923 | 17.233 |
| 11.4               | 0.246   | 0.155 | 9.102 | 10.730 | 12.569   | 14.635 | 16.948 | 0.248 | 0.152 | 9.510 | 11.174 | 13.049   | 15.152 | 17.499 |

| Age, y | Females |       |        |        |          |        |        | Males |       |        |        |          |        |        |
|--------|---------|-------|--------|--------|----------|--------|--------|-------|-------|--------|--------|----------|--------|--------|
|        | L       | S     | -2 SD  | -1 SD  | 0 SD (M) | 1 SD   | 2 SD   | L     | S     | -2 SD  | -1 SD  | 0 SD (M) | 1 SD   | 2 SD   |
| 11.5   | 0.240   | 0.155 | 9.219  | 10.864 | 12.724   | 14.816 | 17.160 | 0.249 | 0.152 | 9.652  | 11.344 | 13.250   | 15.386 | 17.772 |
| 11.6   | 0.234   | 0.155 | 9.335  | 10.998 | 12.878   | 14.996 | 17.371 | 0.250 | 0.152 | 9.797  | 11.517 | 13.454   | 15.626 | 18.050 |
| 11.7   | 0.228   | 0.155 | 9.450  | 11.130 | 13.032   | 15.175 | 17.581 | 0.252 | 0.153 | 9.946  | 11.694 | 13.663   | 15.870 | 18.334 |
| 11.8   | 0.222   | 0.155 | 9.565  | 11.262 | 13.184   | 15.352 | 17.789 | 0.253 | 0.153 | 10.098 | 11.875 | 13.877   | 16.120 | 18.624 |
| 11.9   | 0.216   | 0.155 | 9.679  | 11.392 | 13.335   | 15.528 | 17.995 | 0.254 | 0.153 | 10.253 | 12.060 | 14.094   | 16.375 | 18.919 |
| 12.0   | 0.209   | 0.155 | 9.791  | 11.521 | 13.484   | 15.702 | 18.199 | 0.255 | 0.153 | 10.411 | 12.248 | 14.316   | 16.634 | 19.220 |
| 12.1   | 0.203   | 0.155 | 9.903  | 11.649 | 13.631   | 15.874 | 18.401 | 0.257 | 0.153 | 10.572 | 12.440 | 14.542   | 16.897 | 19.525 |
| 12.2   | 0.197   | 0.155 | 10.013 | 11.775 | 13.777   | 16.044 | 18.601 | 0.258 | 0.153 | 10.736 | 12.635 | 14.771   | 17.165 | 19.836 |
| 12.3   | 0.191   | 0.155 | 10.122 | 11.899 | 13.921   | 16.211 | 18.798 | 0.259 | 0.153 | 10.903 | 12.833 | 15.005   | 17.438 | 20.151 |
| 12.4   | 0.185   | 0.155 | 10.229 | 12.022 | 14.062   | 16.376 | 18.992 | 0.261 | 0.153 | 11.073 | 13.035 | 15.242   | 17.714 | 20.471 |
| 12.5   | 0.179   | 0.154 | 10.335 | 12.142 | 14.201   | 16.539 | 19.183 | 0.262 | 0.153 | 11.245 | 13.239 | 15.482   | 17.994 | 20.795 |
| 12.6   | 0.172   | 0.154 | 10.439 | 12.261 | 14.338   | 16.698 | 19.371 | 0.263 | 0.153 | 11.420 | 13.446 | 15.725   | 18.277 | 21.122 |
| 12.7   | 0.166   | 0.154 | 10.542 | 12.377 | 14.472   | 16.855 | 19.556 | 0.265 | 0.153 | 11.597 | 13.656 | 15.972   | 18.564 | 21.453 |
| 12.8   | 0.160   | 0.154 | 10.642 | 12.491 | 14.604   | 17.008 | 19.736 | 0.266 | 0.153 | 11.776 | 13.868 | 16.220   | 18.853 | 21.787 |
| 12.9   | 0.154   | 0.154 | 10.740 | 12.603 | 14.732   | 17.158 | 19.913 | 0.267 | 0.153 | 11.957 | 14.082 | 16.471   | 19.144 | 22.123 |
| 13.0   | 0.148   | 0.154 | 10.837 | 12.712 | 14.858   | 17.305 | 20.087 | 0.269 | 0.153 | 12.139 | 14.297 | 16.723   | 19.438 | 22.461 |
| 13.1   | 0.142   | 0.154 | 10.931 | 12.819 | 14.981   | 17.448 | 20.256 | 0.270 | 0.153 | 12.323 | 14.514 | 16.978   | 19.733 | 22.801 |
| 13.2   | 0.136   | 0.154 | 11.023 | 12.924 | 15.101   | 17.588 | 20.422 | 0.271 | 0.153 | 12.508 | 14.733 | 17.233   | 20.029 | 23.142 |
| 13.3   | 0.129   | 0.154 | 11.113 | 13.025 | 15.218   | 17.724 | 20.583 | 0.272 | 0.153 | 12.694 | 14.952 | 17.489   | 20.326 | 23.483 |
| 13.4   | 0.123   | 0.154 | 11.201 | 13.125 | 15.331   | 17.857 | 20.741 | 0.274 | 0.153 | 12.881 | 15.172 | 17.746   | 20.624 | 23.825 |
| 13.5   | 0.117   | 0.154 | 11.287 | 13.221 | 15.442   | 17.986 | 20.894 | 0.275 | 0.153 | 13.068 | 15.393 | 18.003   | 20.921 | 24.167 |
| 13.6   | 0.111   | 0.154 | 11.370 | 13.315 | 15.550   | 18.112 | 21.043 | 0.276 | 0.153 | 13.255 | 15.613 | 18.261   | 21.218 | 24.508 |
| 13.7   | 0.105   | 0.154 | 11.451 | 13.406 | 15.654   | 18.233 | 21.187 | 0.278 | 0.153 | 13.443 | 15.834 | 18.517   | 21.515 | 24.848 |
| 13.8   | 0.099   | 0.154 | 11.530 | 13.494 | 15.755   | 18.351 | 21.327 | 0.279 | 0.153 | 13.630 | 16.053 | 18.773   | 21.810 | 25.187 |
| 13.9   | 0.092   | 0.154 | 11.607 | 13.580 | 15.852   | 18.465 | 21.463 | 0.280 | 0.153 | 13.816 | 16.272 | 19.028   | 22.104 | 25.523 |
| 14.0   | 0.086   | 0.154 | 11.681 | 13.662 | 15.947   | 18.576 | 21.595 | 0.282 | 0.153 | 14.002 | 16.490 | 19.281   | 22.395 | 25.856 |
| 14.1   | 0.080   | 0.154 | 11.752 | 13.742 | 16.038   | 18.682 | 21.722 | 0.283 | 0.153 | 14.187 | 16.706 | 19.532   | 22.684 | 26.186 |
| 14.2   | 0.074   | 0.153 | 11.822 | 13.820 | 16.126   | 18.785 | 21.845 | 0.284 | 0.153 | 14.370 | 16.921 | 19.780   | 22.970 | 26.512 |
| 14.3   | 0.068   | 0.153 | 11.889 | 13.894 | 16.211   | 18.884 | 21.964 | 0.286 | 0.153 | 14.552 | 17.133 | 20.026   | 23.253 | 26.835 |
| 14.4   | 0.062   | 0.153 | 11.954 | 13.966 | 16.293   | 18.980 | 22.078 | 0.287 | 0.152 | 14.731 | 17.343 | 20.269   | 23.532 | 27.152 |
| 14.5   | 0.055   | 0.153 | 12.017 | 14.035 | 16.372   | 19.072 | 22.189 | 0.288 | 0.152 | 14.909 | 17.551 | 20.509   | 23.807 | 27.465 |
| 14.6   | 0.049   | 0.153 | 12.077 | 14.102 | 16.447   | 19.160 | 22.295 | 0.289 | 0.152 | 15.085 | 17.755 | 20.746   | 24.078 | 27.773 |
| 14.7   | 0.043   | 0.153 | 12.135 | 14.166 | 16.520   | 19.245 | 22.397 | 0.291 | 0.152 | 15.258 | 17.957 | 20.979   | 24.344 | 28.075 |
| 14.8   | 0.037   | 0.153 | 12.191 | 14.227 | 16.589   | 19.326 | 22.495 | 0.292 | 0.152 | 15.429 | 18.156 | 21.207   | 24.605 | 28.372 |
| 14.9   | 0.031   | 0.153 | 12.245 | 14.286 | 16.655   | 19.403 | 22.589 | 0.293 | 0.152 | 15.597 | 18.351 | 21.432   | 24.862 | 28.662 |
| 15.0   | 0.025   | 0.153 | 12.297 | 14.343 | 16.719   | 19.478 | 22.679 | 0.295 | 0.152 | 15.762 | 18.542 | 21.652   | 25.113 | 28.946 |
| 15.1   | 0.019   | 0.153 | 12.347 | 14.397 | 16.780   | 19.549 | 22.765 | 0.296 | 0.151 | 15.924 | 18.730 | 21.867   | 25.358 | 29.223 |
| 15.2   | 0.012   | 0.153 | 12.394 | 14.448 | 16.838   | 19.616 | 22.847 | 0.297 | 0.151 | 16.082 | 18.913 | 22.078   | 25.597 | 29.492 |
| 15.3   | 0.006   | 0.153 | 12.440 | 14.497 | 16.893   | 19.681 | 22.926 | 0.299 | 0.151 | 16.237 | 19.092 | 22.283   | 25.830 | 29.755 |
| 15.4   | 0.000   | 0.153 | 12.484 | 14.544 | 16.945   | 19.742 | 23.001 | 0.300 | 0.151 | 16.388 | 19.267 | 22.483   | 26.057 | 30.010 |
| 15.5   | -0.006  | 0.153 | 12.525 | 14.589 | 16.995   | 19.801 | 23.073 | 0.301 | 0.151 | 16.536 | 19.438 | 22.678   | 26.277 | 30.258 |
| 15.6   | -0.012  | 0.153 | 12.565 | 14.631 | 17.042   | 19.856 | 23.141 | 0.303 | 0.150 | 16.680 | 19.604 | 22.867   | 26.492 | 30.499 |
| 15.7   | -0.018  | 0.153 | 12.603 | 14.672 | 17.087   | 19.909 | 23.206 | 0.304 | 0.150 | 16.821 | 19.766 | 23.052   | 26.700 | 30.732 |
| 15.8   | -0.025  | 0.153 | 12.640 | 14.710 | 17.129   | 19.958 | 23.267 | 0.305 | 0.150 | 16.958 | 19.923 | 23.230   | 26.901 | 30.957 |
| 15.9   | -0.031  | 0.152 | 12.674 | 14.746 | 17.170   | 20.005 | 23.326 | 0.306 | 0.150 | 17.091 | 20.076 | 23.404   | 27.097 | 31.175 |
| 16.0   | -0.037  | 0.152 | 12.707 | 14.781 | 17.207   | 20.050 | 23.381 | 0.308 | 0.150 | 17.220 | 20.224 | 23.572   | 27.286 | 31.386 |
| 16.1   | -0.043  | 0.152 | 12.739 | 14.813 | 17.243   | 20.091 | 23.434 | 0.309 | 0.149 | 17.345 | 20.367 | 23.734   | 27.468 | 31.589 |
| 16.2   | -0.049  | 0.152 | 12.768 | 14.844 | 17.277   | 20.131 | 23.484 | 0.310 | 0.149 | 17.467 | 20.506 | 23.891   | 27.644 | 31.784 |
| 16.3   | -0.055  | 0.152 | 12.797 | 14.873 | 17.308   | 20.168 | 23.531 | 0.312 | 0.149 | 17.584 | 20.640 | 24.043   | 27.813 | 31.972 |
| 16.4   | -0.062  | 0.152 | 12.824 | 14.900 | 17.338   | 20.203 | 23.575 | 0.313 | 0.149 | 17.698 | 20.770 | 24.189   | 27.976 | 32.152 |
| 16.5   | -0.068  | 0.152 | 12.849 | 14.926 | 17.366   | 20.235 | 23.617 | 0.314 | 0.149 | 17.809 | 20.895 | 24.330   | 28.133 | 32.326 |
| 16.6   | -0.074  | 0.152 | 12.873 | 14.950 | 17.392   | 20.266 | 23.657 | 0.316 | 0.148 | 17.915 | 21.016 | 24.466   | 28.285 | 32.492 |
| 16.7   | -0.080  | 0.152 | 12.896 | 14.973 | 17.416   | 20.295 | 23.694 | 0.317 | 0.148 | 18.018 | 21.133 | 24.597   | 28.430 | 32.652 |
| 16.8   | -0.086  | 0.152 | 12.918 | 14.995 | 17.439   | 20.321 | 23.729 | 0.318 | 0.148 | 18.117 | 21.245 | 24.723   | 28.569 | 32.805 |
| 16.9   | -0.092  | 0.152 | 12.939 | 15.015 | 17.460   | 20.346 | 23.762 | 0.320 | 0.148 | 18.213 | 21.354 | 24.844   | 28.703 | 32.951 |
| 17.0   | -0.098  | 0.152 | 12.959 | 15.034 | 17.479   | 20.369 | 23.793 | 0.321 | 0.148 | 18.306 | 21.458 | 24.960   | 28.831 | 33.091 |
| 17.1   | -0.105  | 0.152 | 12.977 | 15.051 | 17.498   | 20.391 | 23.822 | 0.322 | 0.147 | 18.395 | 21.558 | 25.071   | 28.954 | 33.224 |
| 17.2   | -0.111  | 0.152 | 12.995 | 15.068 | 17.515   | 20.411 | 23.849 | 0.323 | 0.147 | 18.481 | 21.655 | 25.178   | 29.071 | 33.352 |
| 17.3   | -0.117  | 0.152 | 13.011 | 15.083 | 17.530   | 20.430 | 23.875 | 0.325 | 0.147 | 18.563 | 21.747 | 25.281   | 29.184 | 33.473 |
| 17.4   | -0.123  | 0.152 | 13.027 | 15.098 | 17.545   | 20.447 | 23.899 | 0.326 | 0.147 | 18.643 | 21.837 | 25.380   | 29.291 | 33.589 |
| 17.5   | -0.129  | 0.152 | 13.042 | 15.111 | 17.558   | 20.463 | 23.922 | 0.327 | 0.147 | 18.720 | 21.922 | 25.474   | 29.394 | 33.700 |
| 17.6   | -0.135  | 0.152 | 13.056 | 15.123 | 17.571   | 20.477 | 23.943 | 0.329 | 0.146 | 18.793 | 22.004 | 25.564   | 29.492 | 33.805 |
| 17.7   | -0.142  | 0.151 | 13.069 | 15.135 | 17.582   | 20.491 | 23.962 | 0.330 | 0.146 | 18.865 | 22.083 | 25.651   | 29.586 | 33.906 |
| 17.8   | -0.148  | 0.151 | 13.082 | 15.146 | 17.592   | 20.503 | 23.981 | 0.331 | 0.146 | 18.933 | 22.159 | 25.734   | 29.675 | 34.001 |
| 17.9   | -0.154  | 0.151 | 13.094 | 15.156 | 17.602   | 20.514 | 23.998 | 0.333 | 0.146 | 18.999 | 22.232 | 25.814   | 29.761 | 34.092 |
| 18.0   | -0.160  | 0.151 | 13.105 | 15.165 | 17.610   | 20.525 | 24.014 | 0.334 | 0.146 | 19.062 | 22.302 | 25.890   | 29.843 | 34.178 |
| 18.1   | -0.166  | 0.151 | 13.116 | 15.174 | 17.618   | 20.534 | 24.029 | 0.335 | 0.145 | 19.123 | 22.370 | 25.963   | 29.921 | 34.260 |
| 18.2   | -0.172  | 0.151 | 13.126 | 15.181 | 17.625   | 20.543 | 24.043 | 0.337 | 0.145 | 19.182 | 22.435 | 26.033   | 29.995 | 34.338 |

| Age, y | Females |       |        |        |          |        |        | Males |       |        |        |          |        |        |
|--------|---------|-------|--------|--------|----------|--------|--------|-------|-------|--------|--------|----------|--------|--------|
|        | L       | S     | -2 SD  | -1 SD  | 0 SD (M) | 1 SD   | 2 SD   | L     | S     | -2 SD  | -1 SD  | 0 SD (M) | 1 SD   | 2 SD   |
| 18.3   | -0.179  | 0.151 | 13.135 | 15.189 | 17.631   | 20.550 | 24.056 | 0.338 | 0.145 | 19.239 | 22.497 | 26.100   | 30.066 | 34.412 |
| 18.4   | -0.185  | 0.151 | 13.144 | 15.196 | 17.637   | 20.557 | 24.068 | 0.339 | 0.145 | 19.294 | 22.557 | 26.165   | 30.134 | 34.483 |
| 18.5   | -0.191  | 0.151 | 13.153 | 15.202 | 17.642   | 20.563 | 24.079 | 0.340 | 0.144 | 19.347 | 22.615 | 26.227   | 30.200 | 34.550 |
| 18.6   | -0.197  | 0.151 | 13.161 | 15.207 | 17.646   | 20.569 | 24.090 | 0.342 | 0.144 | 19.399 | 22.670 | 26.286   | 30.262 | 34.615 |
| 18.7   | -0.203  | 0.151 | 13.169 | 15.213 | 17.650   | 20.574 | 24.099 | 0.343 | 0.144 | 19.448 | 22.724 | 26.343   | 30.322 | 34.676 |
| 18.8   | -0.209  | 0.151 | 13.176 | 15.217 | 17.654   | 20.578 | 24.108 | 0.344 | 0.144 | 19.496 | 22.776 | 26.399   | 30.379 | 34.734 |
| 18.9   | -0.215  | 0.151 | 13.183 | 15.222 | 17.657   | 20.581 | 24.117 | 0.346 | 0.144 | 19.543 | 22.827 | 26.452   | 30.434 | 34.790 |
| 19.0   | -0.222  | 0.151 | 13.190 | 15.226 | 17.659   | 20.585 | 24.125 | 0.347 | 0.143 | 19.589 | 22.876 | 26.503   | 30.487 | 34.843 |
| 19.1   | -0.228  | 0.151 | 13.196 | 15.229 | 17.661   | 20.587 | 24.132 | 0.348 | 0.143 | 19.633 | 22.923 | 26.553   | 30.538 | 34.895 |
| 19.2   | -0.234  | 0.151 | 13.202 | 15.233 | 17.663   | 20.590 | 24.139 | 0.350 | 0.143 | 19.676 | 22.969 | 26.602   | 30.588 | 34.944 |
| 19.3   | -0.240  | 0.151 | 13.208 | 15.236 | 17.664   | 20.592 | 24.145 | 0.351 | 0.143 | 19.719 | 23.014 | 26.648   | 30.636 | 34.991 |
| 19.4   | -0.246  | 0.150 | 13.214 | 15.239 | 17.665   | 20.593 | 24.151 | 0.352 | 0.143 | 19.760 | 23.058 | 26.694   | 30.682 | 35.036 |
| 19.5   | -0.252  | 0.150 | 13.219 | 15.241 | 17.666   | 20.594 | 24.157 | 0.354 | 0.142 | 19.800 | 23.101 | 26.738   | 30.727 | 35.080 |
| 19.6   | -0.259  | 0.150 | 13.224 | 15.243 | 17.667   | 20.595 | 24.162 | 0.355 | 0.142 | 19.840 | 23.143 | 26.782   | 30.770 | 35.123 |
| 19.7   | -0.265  | 0.150 | 13.229 | 15.245 | 17.667   | 20.596 | 24.167 | 0.356 | 0.142 | 19.879 | 23.185 | 26.824   | 30.813 | 35.164 |
| 19.8   | -0.271  | 0.150 | 13.234 | 15.247 | 17.667   | 20.596 | 24.171 | 0.357 | 0.142 | 19.918 | 23.225 | 26.866   | 30.854 | 35.204 |
| 19.9   | -0.277  | 0.150 | 13.238 | 15.249 | 17.667   | 20.596 | 24.176 | 0.359 | 0.142 | 19.956 | 23.265 | 26.907   | 30.895 | 35.244 |
| 20.0   | -0.283  | 0.150 | 13.243 | 15.250 | 17.666   | 20.596 | 24.180 | 0.360 | 0.141 | 19.993 | 23.305 | 26.947   | 30.935 | 35.282 |

**Black Children**

| Age, y | Females |       |       |       |          |        |        | Males |       |       |       |          |        |        |
|--------|---------|-------|-------|-------|----------|--------|--------|-------|-------|-------|-------|----------|--------|--------|
|        | L       | S     | -2 SD | -1 SD | 0 SD (M) | 1 SD   | 2 SD   | L     | S     | -2 SD | -1 SD | 0 SD (M) | 1 SD   | 2 SD   |
| 5.0    | -0.123  | 0.150 | 3.876 | 4.486 | 5.205    | 6.056  | 7.067  | 1.104 | 0.172 | 3.751 | 4.780 | 5.787    | 6.776  | 7.750  |
| 5.1    | -0.120  | 0.150 | 3.965 | 4.588 | 5.322    | 6.191  | 7.222  | 1.096 | 0.172 | 3.841 | 4.888 | 5.914    | 6.923  | 7.919  |
| 5.2    | -0.117  | 0.150 | 4.054 | 4.690 | 5.440    | 6.326  | 7.377  | 1.088 | 0.172 | 3.932 | 4.997 | 6.042    | 7.071  | 8.087  |
| 5.3    | -0.115  | 0.149 | 4.143 | 4.793 | 5.558    | 6.461  | 7.532  | 1.080 | 0.171 | 4.023 | 5.105 | 6.169    | 7.219  | 8.256  |
| 5.4    | -0.112  | 0.149 | 4.232 | 4.895 | 5.675    | 6.597  | 7.687  | 1.072 | 0.171 | 4.114 | 5.214 | 6.297    | 7.367  | 8.426  |
| 5.5    | -0.109  | 0.149 | 4.322 | 4.998 | 5.793    | 6.732  | 7.842  | 1.063 | 0.171 | 4.206 | 5.322 | 6.425    | 7.515  | 8.595  |
| 5.6    | -0.106  | 0.149 | 4.411 | 5.101 | 5.911    | 6.867  | 7.997  | 1.055 | 0.170 | 4.298 | 5.432 | 6.552    | 7.663  | 8.764  |
| 5.7    | -0.104  | 0.148 | 4.501 | 5.204 | 6.030    | 7.003  | 8.152  | 1.047 | 0.170 | 4.390 | 5.541 | 6.680    | 7.811  | 8.934  |
| 5.8    | -0.101  | 0.148 | 4.591 | 5.307 | 6.148    | 7.138  | 8.307  | 1.039 | 0.170 | 4.483 | 5.650 | 6.809    | 7.959  | 9.103  |
| 5.9    | -0.098  | 0.148 | 4.681 | 5.410 | 6.267    | 7.274  | 8.462  | 1.031 | 0.169 | 4.576 | 5.760 | 6.937    | 8.108  | 9.273  |
| 6.0    | -0.096  | 0.148 | 4.771 | 5.514 | 6.385    | 7.410  | 8.617  | 1.023 | 0.169 | 4.669 | 5.870 | 7.066    | 8.256  | 9.443  |
| 6.1    | -0.093  | 0.148 | 4.862 | 5.618 | 6.505    | 7.546  | 8.773  | 1.015 | 0.168 | 4.763 | 5.981 | 7.194    | 8.405  | 9.613  |
| 6.2    | -0.090  | 0.147 | 4.953 | 5.723 | 6.624    | 7.683  | 8.929  | 1.007 | 0.168 | 4.857 | 6.091 | 7.323    | 8.554  | 9.783  |
| 6.3    | -0.087  | 0.147 | 5.045 | 5.827 | 6.744    | 7.820  | 9.085  | 0.998 | 0.168 | 4.952 | 6.202 | 7.452    | 8.703  | 9.953  |
| 6.4    | -0.085  | 0.147 | 5.136 | 5.933 | 6.865    | 7.958  | 9.242  | 0.990 | 0.167 | 5.046 | 6.312 | 7.581    | 8.851  | 10.123 |
| 6.5    | -0.082  | 0.147 | 5.229 | 6.039 | 6.986    | 8.096  | 9.399  | 0.982 | 0.167 | 5.141 | 6.423 | 7.710    | 9.000  | 10.293 |
| 6.6    | -0.079  | 0.146 | 5.322 | 6.145 | 7.108    | 8.235  | 9.557  | 0.974 | 0.167 | 5.236 | 6.534 | 7.838    | 9.148  | 10.463 |
| 6.7    | -0.076  | 0.146 | 5.415 | 6.252 | 7.230    | 8.375  | 9.716  | 0.966 | 0.166 | 5.332 | 6.645 | 7.967    | 9.297  | 10.633 |
| 6.8    | -0.074  | 0.146 | 5.510 | 6.360 | 7.353    | 8.515  | 9.876  | 0.958 | 0.166 | 5.427 | 6.756 | 8.096    | 9.445  | 10.802 |
| 6.9    | -0.071  | 0.146 | 5.605 | 6.469 | 7.478    | 8.657  | 10.037 | 0.950 | 0.166 | 5.523 | 6.867 | 8.224    | 9.593  | 10.971 |
| 7.0    | -0.068  | 0.145 | 5.700 | 6.579 | 7.603    | 8.799  | 10.199 | 0.942 | 0.165 | 5.619 | 6.978 | 8.352    | 9.741  | 11.141 |
| 7.1    | -0.065  | 0.145 | 5.797 | 6.689 | 7.729    | 8.943  | 10.362 | 0.933 | 0.165 | 5.715 | 7.089 | 8.481    | 9.888  | 11.310 |
| 7.2    | -0.063  | 0.145 | 5.894 | 6.801 | 7.856    | 9.088  | 10.527 | 0.925 | 0.165 | 5.811 | 7.200 | 8.609    | 10.036 | 11.479 |
| 7.3    | -0.060  | 0.145 | 5.993 | 6.914 | 7.985    | 9.235  | 10.693 | 0.917 | 0.164 | 5.908 | 7.311 | 8.738    | 10.184 | 11.648 |
| 7.4    | -0.057  | 0.145 | 6.093 | 7.028 | 8.115    | 9.383  | 10.861 | 0.909 | 0.164 | 6.005 | 7.423 | 8.867    | 10.332 | 11.817 |
| 7.5    | -0.055  | 0.144 | 6.194 | 7.143 | 8.247    | 9.533  | 11.031 | 0.901 | 0.164 | 6.102 | 7.535 | 8.995    | 10.480 | 11.986 |
| 7.6    | -0.052  | 0.144 | 6.296 | 7.260 | 8.380    | 9.684  | 11.203 | 0.893 | 0.163 | 6.199 | 7.647 | 9.124    | 10.628 | 12.155 |
| 7.7    | -0.049  | 0.144 | 6.400 | 7.378 | 8.515    | 9.838  | 11.377 | 0.885 | 0.163 | 6.297 | 7.759 | 9.254    | 10.777 | 12.325 |
| 7.8    | -0.046  | 0.144 | 6.504 | 7.498 | 8.652    | 9.993  | 11.553 | 0.876 | 0.163 | 6.396 | 7.872 | 9.383    | 10.925 | 12.495 |
| 7.9    | -0.044  | 0.143 | 6.611 | 7.620 | 8.791    | 10.150 | 11.731 | 0.868 | 0.162 | 6.495 | 7.985 | 9.513    | 11.074 | 12.665 |
| 8.0    | -0.041  | 0.143 | 6.719 | 7.743 | 8.931    | 10.310 | 11.911 | 0.860 | 0.162 | 6.594 | 8.099 | 9.644    | 11.224 | 12.836 |
| 8.1    | -0.038  | 0.143 | 6.828 | 7.868 | 9.073    | 10.471 | 12.094 | 0.852 | 0.162 | 6.694 | 8.213 | 9.775    | 11.375 | 13.008 |
| 8.2    | -0.035  | 0.143 | 6.939 | 7.995 | 9.217    | 10.635 | 12.280 | 0.844 | 0.161 | 6.795 | 8.328 | 9.907    | 11.526 | 13.182 |
| 8.3    | -0.033  | 0.142 | 7.051 | 8.123 | 9.364    | 10.801 | 12.467 | 0.836 | 0.161 | 6.897 | 8.445 | 10.040   | 11.679 | 13.356 |
| 8.4    | -0.030  | 0.142 | 7.165 | 8.253 | 9.512    | 10.969 | 12.658 | 0.828 | 0.161 | 7.000 | 8.562 | 10.174   | 11.832 | 13.531 |
| 8.5    | -0.027  | 0.142 | 7.281 | 8.385 | 9.662    | 11.140 | 12.851 | 0.820 | 0.160 | 7.104 | 8.680 | 10.310   | 11.987 | 13.708 |
| 8.6    | -0.024  | 0.142 | 7.399 | 8.520 | 9.815    | 11.313 | 13.046 | 0.811 | 0.160 | 7.209 | 8.799 | 10.446   | 12.144 | 13.887 |
| 8.7    | -0.022  | 0.142 | 7.518 | 8.655 | 9.970    | 11.488 | 13.244 | 0.803 | 0.160 | 7.315 | 8.920 | 10.584   | 12.302 | 14.068 |
| 8.8    | -0.019  | 0.141 | 7.638 | 8.793 | 10.126   | 11.666 | 13.445 | 0.795 | 0.160 | 7.423 | 9.042 | 10.724   | 12.462 | 14.251 |
| 8.9    | -0.016  | 0.141 | 7.761 | 8.933 | 10.285   | 11.846 | 13.648 | 0.787 | 0.159 | 7.532 | 9.166 | 10.866   | 12.624 | 14.436 |
| 9.0    | -0.014  | 0.141 | 7.885 | 9.074 | 10.446   | 12.028 | 13.853 | 0.779 | 0.159 | 7.642 | 9.292 | 11.009   | 12.788 | 14.623 |
| 9.1    | -0.011  | 0.141 | 8.010 | 9.217 | 10.608   | 12.212 | 14.061 | 0.771 | 0.159 | 7.754 | 9.419 | 11.154   | 12.954 | 14.813 |
| 9.2    | -0.008  | 0.140 | 8.137 | 9.362 | 10.773   | 12.398 | 14.271 | 0.763 | 0.158 | 7.868 | 9.548 | 11.302   | 13.123 | 15.006 |
| 9.3    | -0.005  | 0.140 | 8.265 | 9.508 | 10.939   | 12.587 | 14.484 | 0.755 | 0.158 | 7.984 | 9.680 | 11.452   | 13.294 | 15.202 |
| 9.4    | -0.003  | 0.140 | 8.395 | 9.656 | 11.107   | 12.777 | 14.698 | 0.746 | 0.158 | 8.102 | 9.813 | 11.604   | 13.469 | 15.401 |
| 9.5    | 0.000   | 0.140 | 8.527 | 9.806 | 11.277   | 12.969 | 14.915 | 0.738 | 0.157 | 8.222 | 9.949 | 11.760   | 13.646 | 15.603 |



| Age, y | Females |       |        |        |          |        |        | Males  |       |        |        |          |        |        |
|--------|---------|-------|--------|--------|----------|--------|--------|--------|-------|--------|--------|----------|--------|--------|
|        | L       | S     | -2 SD  | -1 SD  | 0 SD (M) | 1 SD   | 2 SD   | L      | S     | -2 SD  | -1 SD  | 0 SD (M) | 1 SD   | 2 SD   |
| 16.4   | 0.189   | 0.125 | 15.174 | 17.281 | 19.618   | 22.206 | 25.064 | 0.178  | 0.137 | 20.691 | 23.846 | 27.385   | 31.347 | 35.767 |
| 16.5   | 0.192   | 0.125 | 15.209 | 17.317 | 19.656   | 22.244 | 25.101 | 0.169  | 0.136 | 20.812 | 23.972 | 27.521   | 31.496 | 35.936 |
| 16.6   | 0.194   | 0.125 | 15.242 | 17.353 | 19.693   | 22.281 | 25.137 | 0.161  | 0.136 | 20.929 | 24.094 | 27.651   | 31.638 | 36.096 |
| 16.7   | 0.197   | 0.125 | 15.275 | 17.388 | 19.729   | 22.317 | 25.171 | 0.153  | 0.136 | 21.042 | 24.211 | 27.775   | 31.773 | 36.249 |
| 16.8   | 0.200   | 0.125 | 15.306 | 17.421 | 19.763   | 22.351 | 25.203 | 0.145  | 0.136 | 21.150 | 24.323 | 27.893   | 31.902 | 36.395 |
| 16.9   | 0.202   | 0.124 | 15.337 | 17.454 | 19.797   | 22.384 | 25.234 | 0.137  | 0.135 | 21.254 | 24.429 | 28.005   | 32.025 | 36.532 |
| 17.0   | 0.205   | 0.124 | 15.367 | 17.485 | 19.829   | 22.416 | 25.264 | 0.129  | 0.135 | 21.354 | 24.531 | 28.112   | 32.140 | 36.663 |
| 17.1   | 0.208   | 0.124 | 15.397 | 17.516 | 19.861   | 22.447 | 25.293 | 0.121  | 0.135 | 21.450 | 24.628 | 28.213   | 32.250 | 36.785 |
| 17.2   | 0.211   | 0.124 | 15.425 | 17.546 | 19.891   | 22.476 | 25.320 | 0.113  | 0.135 | 21.541 | 24.720 | 28.309   | 32.353 | 36.901 |
| 17.3   | 0.213   | 0.124 | 15.453 | 17.575 | 19.921   | 22.505 | 25.346 | 0.104  | 0.134 | 21.628 | 24.808 | 28.399   | 32.449 | 37.009 |
| 17.4   | 0.216   | 0.123 | 15.480 | 17.604 | 19.949   | 22.533 | 25.371 | 0.096  | 0.134 | 21.712 | 24.890 | 28.484   | 32.539 | 37.110 |
| 17.5   | 0.219   | 0.123 | 15.507 | 17.632 | 19.977   | 22.559 | 25.395 | 0.088  | 0.134 | 21.791 | 24.968 | 28.563   | 32.624 | 37.204 |
| 17.6   | 0.222   | 0.123 | 15.533 | 17.658 | 20.004   | 22.585 | 25.418 | 0.080  | 0.133 | 21.866 | 25.042 | 28.637   | 32.702 | 37.291 |
| 17.7   | 0.224   | 0.123 | 15.558 | 17.685 | 20.030   | 22.610 | 25.440 | 0.072  | 0.133 | 21.937 | 25.110 | 28.706   | 32.774 | 37.372 |
| 17.8   | 0.227   | 0.123 | 15.583 | 17.710 | 20.055   | 22.634 | 25.461 | 0.064  | 0.133 | 22.004 | 25.175 | 28.769   | 32.840 | 37.445 |
| 17.9   | 0.230   | 0.122 | 15.607 | 17.735 | 20.080   | 22.657 | 25.481 | 0.056  | 0.133 | 22.067 | 25.235 | 28.828   | 32.900 | 37.512 |
| 18.0   | 0.233   | 0.122 | 15.631 | 17.759 | 20.104   | 22.679 | 25.500 | 0.048  | 0.132 | 22.127 | 25.290 | 28.881   | 32.955 | 37.572 |
| 18.1   | 0.235   | 0.122 | 15.654 | 17.783 | 20.127   | 22.701 | 25.518 | 0.039  | 0.132 | 22.182 | 25.341 | 28.930   | 33.004 | 37.626 |
| 18.2   | 0.238   | 0.122 | 15.676 | 17.806 | 20.150   | 22.721 | 25.536 | 0.031  | 0.132 | 22.234 | 25.388 | 28.973   | 33.047 | 37.673 |
| 18.3   | 0.241   | 0.122 | 15.698 | 17.829 | 20.172   | 22.741 | 25.552 | 0.023  | 0.132 | 22.283 | 25.431 | 29.013   | 33.086 | 37.715 |
| 18.4   | 0.243   | 0.121 | 15.720 | 17.851 | 20.193   | 22.761 | 25.568 | 0.015  | 0.131 | 22.328 | 25.471 | 29.048   | 33.119 | 37.751 |
| 18.5   | 0.246   | 0.121 | 15.741 | 17.872 | 20.214   | 22.779 | 25.583 | 0.007  | 0.131 | 22.370 | 25.506 | 29.079   | 33.148 | 37.782 |
| 18.6   | 0.249   | 0.121 | 15.762 | 17.893 | 20.234   | 22.797 | 25.598 | -0.001 | 0.131 | 22.409 | 25.539 | 29.106   | 33.172 | 37.807 |
| 18.7   | 0.252   | 0.121 | 15.782 | 17.914 | 20.254   | 22.815 | 25.611 | -0.009 | 0.130 | 22.445 | 25.568 | 29.129   | 33.192 | 37.828 |
| 18.8   | 0.254   | 0.121 | 15.802 | 17.934 | 20.273   | 22.832 | 25.625 | -0.017 | 0.130 | 22.479 | 25.594 | 29.149   | 33.209 | 37.845 |
| 18.9   | 0.257   | 0.121 | 15.822 | 17.954 | 20.292   | 22.849 | 25.637 | -0.026 | 0.130 | 22.509 | 25.617 | 29.166   | 33.221 | 37.857 |
| 19.0   | 0.260   | 0.120 | 15.841 | 17.973 | 20.310   | 22.865 | 25.650 | -0.034 | 0.130 | 22.538 | 25.637 | 29.180   | 33.230 | 37.865 |
| 19.1   | 0.263   | 0.120 | 15.861 | 17.992 | 20.328   | 22.880 | 25.661 | -0.042 | 0.129 | 22.564 | 25.655 | 29.190   | 33.236 | 37.869 |
| 19.2   | 0.265   | 0.120 | 15.879 | 18.011 | 20.346   | 22.896 | 25.673 | -0.050 | 0.129 | 22.588 | 25.671 | 29.199   | 33.239 | 37.870 |
| 19.3   | 0.268   | 0.120 | 15.898 | 18.030 | 20.363   | 22.911 | 25.684 | -0.058 | 0.129 | 22.610 | 25.685 | 29.205   | 33.239 | 37.868 |
| 19.4   | 0.271   | 0.120 | 15.917 | 18.048 | 20.381   | 22.925 | 25.695 | -0.066 | 0.129 | 22.631 | 25.697 | 29.209   | 33.238 | 37.864 |
| 19.5   | 0.274   | 0.119 | 15.935 | 18.066 | 20.398   | 22.940 | 25.705 | -0.074 | 0.128 | 22.651 | 25.707 | 29.211   | 33.234 | 37.858 |
| 19.6   | 0.276   | 0.119 | 15.953 | 18.085 | 20.415   | 22.954 | 25.716 | -0.083 | 0.128 | 22.669 | 25.716 | 29.212   | 33.229 | 37.849 |
| 19.7   | 0.279   | 0.119 | 15.972 | 18.103 | 20.431   | 22.969 | 25.726 | -0.091 | 0.128 | 22.686 | 25.725 | 29.212   | 33.222 | 37.840 |
| 19.8   | 0.282   | 0.119 | 15.990 | 18.121 | 20.448   | 22.983 | 25.736 | -0.099 | 0.128 | 22.703 | 25.732 | 29.212   | 33.215 | 37.829 |
| 19.9   | 0.284   | 0.119 | 16.008 | 18.139 | 20.465   | 22.997 | 25.746 | -0.107 | 0.127 | 22.719 | 25.739 | 29.210   | 33.207 | 37.817 |
| 20.0   | 0.287   | 0.118 | 16.026 | 18.156 | 20.481   | 23.011 | 25.756 | -0.115 | 0.127 | 22.735 | 25.746 | 29.209   | 33.198 | 37.806 |



**Table S32. Leg Lean Soft Tissue Mass, kg**

**Non-Black Children**

| Age, y | Females |       |       |       |          |        | Males  |       |       |       |       |          |        |        |
|--------|---------|-------|-------|-------|----------|--------|--------|-------|-------|-------|-------|----------|--------|--------|
|        | L       | S     | -2 SD | -1 SD | 0 SD (M) | 1 SD   | 2 SD   | L     | S     | -2 SD | -1 SD | 0 SD (M) | 1 SD   | 2 SD   |
| 5.0    | 0.642   | 0.165 | 2.322 | 2.826 | 3.364    | 3.935  | 4.537  | 0.138 | 0.145 | 2.743 | 3.184 | 3.685    | 4.253  | 4.894  |
| 5.1    | 0.636   | 0.165 | 2.378 | 2.893 | 3.443    | 4.027  | 4.645  | 0.140 | 0.145 | 2.800 | 3.251 | 3.763    | 4.343  | 4.999  |
| 5.2    | 0.630   | 0.165 | 2.434 | 2.960 | 3.522    | 4.120  | 4.752  | 0.142 | 0.145 | 2.858 | 3.319 | 3.842    | 4.434  | 5.104  |
| 5.3    | 0.624   | 0.165 | 2.491 | 3.027 | 3.601    | 4.213  | 4.859  | 0.144 | 0.145 | 2.915 | 3.386 | 3.920    | 4.526  | 5.209  |
| 5.4    | 0.618   | 0.165 | 2.547 | 3.094 | 3.681    | 4.305  | 4.967  | 0.146 | 0.145 | 2.972 | 3.453 | 3.999    | 4.617  | 5.315  |
| 5.5    | 0.612   | 0.165 | 2.604 | 3.161 | 3.760    | 4.398  | 5.074  | 0.148 | 0.145 | 3.030 | 3.521 | 4.078    | 4.709  | 5.421  |
| 5.6    | 0.607   | 0.164 | 2.660 | 3.229 | 3.839    | 4.491  | 5.182  | 0.151 | 0.146 | 3.087 | 3.588 | 4.157    | 4.801  | 5.527  |
| 5.7    | 0.601   | 0.164 | 2.717 | 3.296 | 3.919    | 4.584  | 5.290  | 0.153 | 0.146 | 3.145 | 3.656 | 4.237    | 4.893  | 5.634  |
| 5.8    | 0.595   | 0.164 | 2.774 | 3.364 | 3.998    | 4.677  | 5.398  | 0.155 | 0.146 | 3.203 | 3.724 | 4.316    | 4.986  | 5.741  |
| 5.9    | 0.589   | 0.164 | 2.831 | 3.431 | 4.078    | 4.770  | 5.506  | 0.157 | 0.146 | 3.261 | 3.793 | 4.396    | 5.079  | 5.848  |
| 6.0    | 0.583   | 0.164 | 2.888 | 3.499 | 4.158    | 4.863  | 5.614  | 0.159 | 0.146 | 3.319 | 3.861 | 4.476    | 5.172  | 5.956  |
| 6.1    | 0.578   | 0.164 | 2.946 | 3.567 | 4.238    | 4.957  | 5.723  | 0.162 | 0.146 | 3.377 | 3.930 | 4.557    | 5.266  | 6.064  |
| 6.2    | 0.572   | 0.164 | 3.003 | 3.635 | 4.318    | 5.050  | 5.832  | 0.164 | 0.146 | 3.435 | 3.999 | 4.638    | 5.359  | 6.173  |
| 6.3    | 0.566   | 0.164 | 3.061 | 3.704 | 4.398    | 5.145  | 5.941  | 0.166 | 0.147 | 3.494 | 4.068 | 4.719    | 5.454  | 6.282  |
| 6.4    | 0.560   | 0.164 | 3.119 | 3.772 | 4.479    | 5.239  | 6.051  | 0.168 | 0.147 | 3.553 | 4.137 | 4.800    | 5.549  | 6.392  |
| 6.5    | 0.554   | 0.164 | 3.178 | 3.841 | 4.560    | 5.334  | 6.161  | 0.170 | 0.147 | 3.612 | 4.207 | 4.882    | 5.644  | 6.502  |
| 6.6    | 0.548   | 0.164 | 3.237 | 3.911 | 4.642    | 5.429  | 6.271  | 0.173 | 0.147 | 3.671 | 4.277 | 4.964    | 5.739  | 6.612  |
| 6.7    | 0.543   | 0.164 | 3.296 | 3.980 | 4.724    | 5.525  | 6.383  | 0.175 | 0.147 | 3.730 | 4.347 | 5.046    | 5.835  | 6.723  |
| 6.8    | 0.537   | 0.163 | 3.355 | 4.050 | 4.806    | 5.621  | 6.494  | 0.177 | 0.147 | 3.789 | 4.417 | 5.128    | 5.931  | 6.835  |
| 6.9    | 0.531   | 0.163 | 3.415 | 4.121 | 4.888    | 5.717  | 6.607  | 0.179 | 0.147 | 3.849 | 4.488 | 5.211    | 6.028  | 6.947  |
| 7.0    | 0.525   | 0.163 | 3.475 | 4.192 | 4.972    | 5.815  | 6.720  | 0.181 | 0.148 | 3.909 | 4.558 | 5.294    | 6.125  | 7.059  |
| 7.1    | 0.519   | 0.163 | 3.536 | 4.263 | 5.056    | 5.913  | 6.834  | 0.183 | 0.148 | 3.968 | 4.630 | 5.378    | 6.222  | 7.172  |
| 7.2    | 0.513   | 0.163 | 3.597 | 4.335 | 5.140    | 6.011  | 6.949  | 0.186 | 0.148 | 4.028 | 4.701 | 5.462    | 6.320  | 7.285  |
| 7.3    | 0.508   | 0.163 | 3.659 | 4.408 | 5.225    | 6.111  | 7.065  | 0.188 | 0.148 | 4.089 | 4.772 | 5.546    | 6.418  | 7.399  |
| 7.4    | 0.502   | 0.163 | 3.721 | 4.481 | 5.311    | 6.211  | 7.182  | 0.190 | 0.148 | 4.149 | 4.844 | 5.630    | 6.517  | 7.513  |
| 7.5    | 0.496   | 0.163 | 3.784 | 4.555 | 5.397    | 6.312  | 7.299  | 0.192 | 0.148 | 4.210 | 4.916 | 5.715    | 6.616  | 7.628  |
| 7.6    | 0.490   | 0.163 | 3.848 | 4.629 | 5.485    | 6.414  | 7.418  | 0.194 | 0.149 | 4.270 | 4.988 | 5.800    | 6.715  | 7.743  |
| 7.7    | 0.484   | 0.163 | 3.912 | 4.705 | 5.573    | 6.517  | 7.538  | 0.197 | 0.149 | 4.331 | 5.060 | 5.885    | 6.815  | 7.859  |
| 7.8    | 0.478   | 0.163 | 3.977 | 4.781 | 5.662    | 6.622  | 7.660  | 0.199 | 0.149 | 4.392 | 5.133 | 5.971    | 6.915  | 7.975  |
| 7.9    | 0.473   | 0.162 | 4.042 | 4.857 | 5.752    | 6.727  | 7.782  | 0.201 | 0.149 | 4.453 | 5.206 | 6.057    | 7.015  | 8.091  |
| 8.0    | 0.467   | 0.162 | 4.109 | 4.935 | 5.843    | 6.833  | 7.906  | 0.203 | 0.149 | 4.515 | 5.279 | 6.143    | 7.116  | 8.209  |
| 8.1    | 0.461   | 0.162 | 4.176 | 5.014 | 5.935    | 6.941  | 8.032  | 0.205 | 0.149 | 4.577 | 5.353 | 6.230    | 7.218  | 8.327  |
| 8.2    | 0.455   | 0.162 | 4.244 | 5.093 | 6.028    | 7.050  | 8.159  | 0.208 | 0.150 | 4.639 | 5.427 | 6.318    | 7.320  | 8.445  |
| 8.3    | 0.449   | 0.162 | 4.313 | 5.174 | 6.123    | 7.160  | 8.287  | 0.210 | 0.150 | 4.701 | 5.501 | 6.406    | 7.423  | 8.565  |
| 8.4    | 0.443   | 0.162 | 4.382 | 5.256 | 6.218    | 7.271  | 8.417  | 0.212 | 0.150 | 4.764 | 5.576 | 6.494    | 7.527  | 8.685  |
| 8.5    | 0.438   | 0.162 | 4.453 | 5.338 | 6.315    | 7.384  | 8.549  | 0.214 | 0.150 | 4.827 | 5.652 | 6.583    | 7.632  | 8.807  |
| 8.6    | 0.432   | 0.162 | 4.525 | 5.422 | 6.413    | 7.499  | 8.682  | 0.216 | 0.150 | 4.891 | 5.728 | 6.673    | 7.737  | 8.929  |
| 8.7    | 0.426   | 0.162 | 4.597 | 5.507 | 6.512    | 7.615  | 8.818  | 0.218 | 0.150 | 4.955 | 5.805 | 6.764    | 7.843  | 9.052  |
| 8.8    | 0.420   | 0.162 | 4.671 | 5.593 | 6.612    | 7.732  | 8.955  | 0.221 | 0.151 | 5.020 | 5.882 | 6.856    | 7.951  | 9.177  |
| 8.9    | 0.414   | 0.162 | 4.745 | 5.680 | 6.714    | 7.851  | 9.093  | 0.223 | 0.151 | 5.085 | 5.961 | 6.948    | 8.059  | 9.303  |
| 9.0    | 0.408   | 0.162 | 4.821 | 5.768 | 6.817    | 7.971  | 9.234  | 0.225 | 0.151 | 5.152 | 6.040 | 7.042    | 8.169  | 9.431  |
| 9.1    | 0.403   | 0.161 | 4.898 | 5.857 | 6.922    | 8.093  | 9.376  | 0.227 | 0.151 | 5.219 | 6.120 | 7.137    | 8.280  | 9.560  |
| 9.2    | 0.397   | 0.161 | 4.975 | 5.948 | 7.027    | 8.217  | 9.521  | 0.229 | 0.151 | 5.286 | 6.201 | 7.233    | 8.393  | 9.690  |
| 9.3    | 0.391   | 0.161 | 5.054 | 6.040 | 7.134    | 8.342  | 9.667  | 0.232 | 0.151 | 5.355 | 6.283 | 7.331    | 8.507  | 9.823  |
| 9.4    | 0.385   | 0.161 | 5.134 | 6.133 | 7.243    | 8.469  | 9.815  | 0.234 | 0.152 | 5.425 | 6.367 | 7.430    | 8.623  | 9.958  |
| 9.5    | 0.379   | 0.161 | 5.214 | 6.227 | 7.353    | 8.597  | 9.965  | 0.236 | 0.152 | 5.496 | 6.452 | 7.530    | 8.741  | 10.095 |
| 9.6    | 0.373   | 0.161 | 5.296 | 6.322 | 7.464    | 8.727  | 10.117 | 0.238 | 0.152 | 5.568 | 6.538 | 7.632    | 8.860  | 10.234 |
| 9.7    | 0.368   | 0.161 | 5.379 | 6.418 | 7.576    | 8.858  | 10.270 | 0.240 | 0.152 | 5.641 | 6.626 | 7.736    | 8.982  | 10.375 |
| 9.8    | 0.362   | 0.161 | 5.462 | 6.515 | 7.690    | 8.991  | 10.425 | 0.243 | 0.152 | 5.716 | 6.716 | 7.842    | 9.106  | 10.519 |
| 9.9    | 0.356   | 0.161 | 5.547 | 6.614 | 7.804    | 9.125  | 10.581 | 0.245 | 0.152 | 5.792 | 6.807 | 7.950    | 9.233  | 10.666 |
| 10.0   | 0.350   | 0.161 | 5.632 | 6.713 | 7.920    | 9.260  | 10.739 | 0.247 | 0.153 | 5.870 | 6.900 | 8.060    | 9.362  | 10.816 |
| 10.1   | 0.344   | 0.161 | 5.718 | 6.813 | 8.037    | 9.397  | 10.899 | 0.249 | 0.153 | 5.949 | 6.994 | 8.172    | 9.493  | 10.968 |
| 10.2   | 0.338   | 0.161 | 5.805 | 6.914 | 8.155    | 9.534  | 11.060 | 0.251 | 0.153 | 6.030 | 7.091 | 8.287    | 9.627  | 11.124 |
| 10.3   | 0.333   | 0.160 | 5.893 | 7.016 | 8.273    | 9.673  | 11.222 | 0.253 | 0.153 | 6.112 | 7.190 | 8.404    | 9.765  | 11.283 |
| 10.4   | 0.327   | 0.160 | 5.981 | 7.118 | 8.393    | 9.813  | 11.386 | 0.256 | 0.153 | 6.197 | 7.291 | 8.524    | 9.905  | 11.446 |
| 10.5   | 0.321   | 0.160 | 6.070 | 7.222 | 8.513    | 9.953  | 11.550 | 0.258 | 0.153 | 6.283 | 7.395 | 8.646    | 10.048 | 11.612 |
| 10.6   | 0.315   | 0.160 | 6.160 | 7.325 | 8.634    | 10.094 | 11.715 | 0.260 | 0.153 | 6.372 | 7.501 | 8.771    | 10.194 | 11.782 |
| 10.7   | 0.309   | 0.160 | 6.249 | 7.430 | 8.755    | 10.236 | 11.881 | 0.262 | 0.153 | 6.462 | 7.609 | 8.899    | 10.344 | 11.955 |
| 10.8   | 0.304   | 0.160 | 6.340 | 7.534 | 8.877    | 10.378 | 12.048 | 0.264 | 0.154 | 6.555 | 7.720 | 9.030    | 10.497 | 12.132 |
| 10.9   | 0.298   | 0.160 | 6.430 | 7.639 | 8.999    | 10.521 | 12.215 | 0.267 | 0.154 | 6.649 | 7.833 | 9.164    | 10.653 | 12.314 |
| 11.0   | 0.292   | 0.160 | 6.521 | 7.744 | 9.121    | 10.663 | 12.382 | 0.269 | 0.154 | 6.746 | 7.948 | 9.300    | 10.813 | 12.499 |
| 11.1   | 0.286   | 0.160 | 6.612 | 7.849 | 9.243    | 10.806 | 12.549 | 0.271 | 0.154 | 6.845 | 8.067 | 9.440    | 10.977 | 12.688 |
| 11.2   | 0.280   | 0.160 | 6.703 | 7.954 | 9.365    | 10.949 | 12.716 | 0.273 | 0.154 | 6.946 | 8.188 | 9.583    | 11.143 | 12.881 |
| 11.3   | 0.274   | 0.160 | 6.793 | 8.059 | 9.487    | 11.091 | 12.883 | 0.275 | 0.154 | 7.050 | 8.311 | 9.729    | 11.314 | 13.078 |
| 11.4   | 0.269   | 0.160 | 6.884 | 8.163 | 9.609    | 11.233 | 13.050 | 0.278 | 0.154 | 7.156 | 8.438 | 9.878    | 11.488 | 13.279 |



| Age, y | Females |       |        |        |          |        |        | Males |       |        |        |          |        |        |
|--------|---------|-------|--------|--------|----------|--------|--------|-------|-------|--------|--------|----------|--------|--------|
|        | L       | S     | -2 SD  | -1 SD  | 0 SD (M) | 1 SD   | 2 SD   | L     | S     | -2 SD  | -1 SD  | 0 SD (M) | 1 SD   | 2 SD   |
| 18.3   | -0.134  | 0.154 | 10.039 | 11.655 | 13.571   | 15.853 | 18.580 | 0.429 | 0.144 | 14.030 | 16.451 | 19.095   | 21.967 | 25.071 |
| 18.4   | -0.140  | 0.154 | 10.046 | 11.660 | 13.575   | 15.858 | 18.588 | 0.431 | 0.144 | 14.062 | 16.486 | 19.131   | 22.003 | 25.106 |
| 18.5   | -0.145  | 0.154 | 10.053 | 11.664 | 13.578   | 15.861 | 18.594 | 0.433 | 0.144 | 14.092 | 16.518 | 19.165   | 22.037 | 25.139 |
| 18.6   | -0.151  | 0.154 | 10.059 | 11.668 | 13.581   | 15.864 | 18.601 | 0.435 | 0.144 | 14.122 | 16.550 | 19.198   | 22.070 | 25.170 |
| 18.7   | -0.157  | 0.153 | 10.065 | 11.672 | 13.584   | 15.867 | 18.606 | 0.437 | 0.144 | 14.150 | 16.580 | 19.228   | 22.100 | 25.198 |
| 18.8   | -0.163  | 0.153 | 10.071 | 11.675 | 13.586   | 15.869 | 18.611 | 0.439 | 0.143 | 14.177 | 16.608 | 19.258   | 22.128 | 25.225 |
| 18.9   | -0.169  | 0.153 | 10.076 | 11.678 | 13.587   | 15.871 | 18.615 | 0.442 | 0.143 | 14.203 | 16.636 | 19.286   | 22.155 | 25.249 |
| 19.0   | -0.175  | 0.153 | 10.081 | 11.681 | 13.588   | 15.872 | 18.619 | 0.444 | 0.143 | 14.228 | 16.663 | 19.312   | 22.181 | 25.272 |
| 19.1   | -0.180  | 0.153 | 10.086 | 11.684 | 13.589   | 15.873 | 18.623 | 0.446 | 0.143 | 14.253 | 16.688 | 19.338   | 22.205 | 25.294 |
| 19.2   | -0.186  | 0.153 | 10.090 | 11.686 | 13.590   | 15.873 | 18.626 | 0.448 | 0.142 | 14.277 | 16.713 | 19.362   | 22.228 | 25.314 |
| 19.3   | -0.192  | 0.153 | 10.095 | 11.688 | 13.590   | 15.873 | 18.629 | 0.450 | 0.142 | 14.300 | 16.737 | 19.386   | 22.250 | 25.333 |
| 19.4   | -0.198  | 0.153 | 10.099 | 11.690 | 13.590   | 15.873 | 18.631 | 0.453 | 0.142 | 14.322 | 16.760 | 19.408   | 22.271 | 25.351 |
| 19.5   | -0.204  | 0.153 | 10.103 | 11.691 | 13.590   | 15.873 | 18.633 | 0.455 | 0.142 | 14.344 | 16.782 | 19.430   | 22.291 | 25.367 |
| 19.6   | -0.210  | 0.153 | 10.106 | 11.692 | 13.590   | 15.872 | 18.635 | 0.457 | 0.142 | 14.366 | 16.804 | 19.451   | 22.310 | 25.383 |
| 19.7   | -0.215  | 0.153 | 10.110 | 11.693 | 13.589   | 15.871 | 18.636 | 0.459 | 0.141 | 14.387 | 16.826 | 19.472   | 22.329 | 25.398 |
| 19.8   | -0.221  | 0.153 | 10.113 | 11.694 | 13.588   | 15.870 | 18.638 | 0.461 | 0.141 | 14.407 | 16.846 | 19.492   | 22.347 | 25.412 |
| 19.9   | -0.227  | 0.153 | 10.117 | 11.695 | 13.587   | 15.869 | 18.639 | 0.464 | 0.141 | 14.428 | 16.867 | 19.512   | 22.364 | 25.426 |
| 20.0   | -0.233  | 0.152 | 10.120 | 11.696 | 13.586   | 15.867 | 18.640 | 0.466 | 0.141 | 14.448 | 16.887 | 19.531   | 22.381 | 25.439 |

**Black Children**

| Age, y | Females |       |       |       |          |       |        | Males |       |       |       |          |        |        |
|--------|---------|-------|-------|-------|----------|-------|--------|-------|-------|-------|-------|----------|--------|--------|
|        | L       | S     | -2 SD | -1 SD | 0 SD (M) | 1 SD  | 2 SD   | L     | S     | -2 SD | -1 SD | 0 SD (M) | 1 SD   | 2 SD   |
| 5.0    | -0.044  | 0.154 | 2.838 | 3.304 | 3.851    | 4.493 | 5.247  | 1.360 | 0.170 | 2.674 | 3.479 | 4.221    | 4.919  | 5.582  |
| 5.1    | -0.042  | 0.153 | 2.908 | 3.385 | 3.944    | 4.600 | 5.371  | 1.350 | 0.170 | 2.744 | 3.563 | 4.320    | 5.034  | 5.714  |
| 5.2    | -0.040  | 0.153 | 2.978 | 3.466 | 4.038    | 4.708 | 5.495  | 1.339 | 0.169 | 2.813 | 3.647 | 4.420    | 5.149  | 5.845  |
| 5.3    | -0.038  | 0.153 | 3.048 | 3.547 | 4.131    | 4.816 | 5.619  | 1.328 | 0.169 | 2.883 | 3.731 | 4.519    | 5.265  | 5.977  |
| 5.4    | -0.036  | 0.153 | 3.118 | 3.628 | 4.225    | 4.923 | 5.743  | 1.317 | 0.169 | 2.954 | 3.815 | 4.619    | 5.380  | 6.108  |
| 5.5    | -0.034  | 0.152 | 3.189 | 3.709 | 4.318    | 5.031 | 5.866  | 1.306 | 0.169 | 3.024 | 3.900 | 4.718    | 5.495  | 6.240  |
| 5.6    | -0.032  | 0.152 | 3.259 | 3.791 | 4.412    | 5.139 | 5.990  | 1.296 | 0.168 | 3.095 | 3.985 | 4.818    | 5.611  | 6.372  |
| 5.7    | -0.030  | 0.152 | 3.330 | 3.872 | 4.506    | 5.247 | 6.114  | 1.285 | 0.168 | 3.166 | 4.069 | 4.918    | 5.726  | 6.504  |
| 5.8    | -0.028  | 0.152 | 3.401 | 3.954 | 4.600    | 5.355 | 6.238  | 1.274 | 0.168 | 3.238 | 4.154 | 5.018    | 5.842  | 6.636  |
| 5.9    | -0.026  | 0.151 | 3.472 | 4.036 | 4.694    | 5.463 | 6.362  | 1.263 | 0.168 | 3.310 | 4.239 | 5.118    | 5.958  | 6.768  |
| 6.0    | -0.024  | 0.151 | 3.543 | 4.118 | 4.788    | 5.571 | 6.486  | 1.253 | 0.167 | 3.382 | 4.325 | 5.218    | 6.074  | 6.900  |
| 6.1    | -0.022  | 0.151 | 3.614 | 4.200 | 4.883    | 5.680 | 6.610  | 1.242 | 0.167 | 3.454 | 4.410 | 5.318    | 6.190  | 7.033  |
| 6.2    | -0.020  | 0.151 | 3.686 | 4.282 | 4.978    | 5.789 | 6.735  | 1.231 | 0.167 | 3.527 | 4.496 | 5.419    | 6.306  | 7.166  |
| 6.3    | -0.019  | 0.150 | 3.758 | 4.365 | 5.073    | 5.898 | 6.859  | 1.220 | 0.167 | 3.600 | 4.582 | 5.519    | 6.422  | 7.299  |
| 6.4    | -0.017  | 0.150 | 3.830 | 4.448 | 5.168    | 6.007 | 6.985  | 1.209 | 0.166 | 3.673 | 4.668 | 5.620    | 6.539  | 7.432  |
| 6.5    | -0.015  | 0.150 | 3.903 | 4.532 | 5.264    | 6.117 | 7.110  | 1.199 | 0.166 | 3.747 | 4.754 | 5.721    | 6.656  | 7.565  |
| 6.6    | -0.013  | 0.150 | 3.976 | 4.616 | 5.361    | 6.227 | 7.236  | 1.188 | 0.166 | 3.821 | 4.841 | 5.822    | 6.773  | 7.699  |
| 6.7    | -0.011  | 0.149 | 4.049 | 4.700 | 5.458    | 6.338 | 7.363  | 1.177 | 0.165 | 3.895 | 4.928 | 5.924    | 6.890  | 7.833  |
| 6.8    | -0.009  | 0.149 | 4.123 | 4.785 | 5.555    | 6.450 | 7.490  | 1.166 | 0.165 | 3.970 | 5.015 | 6.025    | 7.008  | 7.968  |
| 6.9    | -0.007  | 0.149 | 4.198 | 4.871 | 5.653    | 6.562 | 7.618  | 1.155 | 0.165 | 4.045 | 5.103 | 6.127    | 7.126  | 8.103  |
| 7.0    | -0.005  | 0.149 | 4.273 | 4.957 | 5.752    | 6.675 | 7.747  | 1.145 | 0.165 | 4.121 | 5.191 | 6.230    | 7.244  | 8.238  |
| 7.1    | -0.003  | 0.149 | 4.349 | 5.044 | 5.852    | 6.789 | 7.877  | 1.134 | 0.164 | 4.197 | 5.279 | 6.333    | 7.363  | 8.374  |
| 7.2    | -0.001  | 0.148 | 4.425 | 5.132 | 5.952    | 6.904 | 8.008  | 1.123 | 0.164 | 4.274 | 5.368 | 6.436    | 7.482  | 8.511  |
| 7.3    | 0.001   | 0.148 | 4.502 | 5.221 | 6.054    | 7.020 | 8.140  | 1.112 | 0.164 | 4.351 | 5.458 | 6.540    | 7.602  | 8.648  |
| 7.4    | 0.003   | 0.148 | 4.580 | 5.310 | 6.156    | 7.137 | 8.273  | 1.102 | 0.164 | 4.428 | 5.548 | 6.644    | 7.723  | 8.786  |
| 7.5    | 0.005   | 0.148 | 4.659 | 5.401 | 6.260    | 7.255 | 8.408  | 1.091 | 0.163 | 4.507 | 5.638 | 6.750    | 7.844  | 8.925  |
| 7.6    | 0.007   | 0.147 | 4.739 | 5.493 | 6.365    | 7.375 | 8.544  | 1.080 | 0.163 | 4.586 | 5.730 | 6.855    | 7.966  | 9.065  |
| 7.7    | 0.009   | 0.147 | 4.820 | 5.585 | 6.471    | 7.496 | 8.682  | 1.069 | 0.163 | 4.666 | 5.822 | 6.962    | 8.089  | 9.206  |
| 7.8    | 0.010   | 0.147 | 4.902 | 5.679 | 6.579    | 7.618 | 8.821  | 1.058 | 0.163 | 4.746 | 5.914 | 7.069    | 8.213  | 9.348  |
| 7.9    | 0.012   | 0.147 | 4.985 | 5.774 | 6.687    | 7.742 | 8.962  | 1.048 | 0.162 | 4.827 | 6.008 | 7.177    | 8.338  | 9.491  |
| 8.0    | 0.014   | 0.146 | 5.069 | 5.871 | 6.797    | 7.868 | 9.104  | 1.037 | 0.162 | 4.909 | 6.102 | 7.286    | 8.464  | 9.635  |
| 8.1    | 0.016   | 0.146 | 5.154 | 5.968 | 6.909    | 7.995 | 9.249  | 1.026 | 0.162 | 4.992 | 6.197 | 7.397    | 8.591  | 9.780  |
| 8.2    | 0.018   | 0.146 | 5.240 | 6.067 | 7.022    | 8.124 | 9.395  | 1.015 | 0.162 | 5.076 | 6.294 | 7.508    | 8.719  | 9.927  |
| 8.3    | 0.020   | 0.146 | 5.328 | 6.168 | 7.137    | 8.254 | 9.543  | 1.004 | 0.161 | 5.161 | 6.391 | 7.620    | 8.848  | 10.076 |
| 8.4    | 0.022   | 0.145 | 5.417 | 6.269 | 7.253    | 8.386 | 9.693  | 0.994 | 0.161 | 5.247 | 6.489 | 7.734    | 8.979  | 10.226 |
| 8.5    | 0.024   | 0.145 | 5.507 | 6.372 | 7.370    | 8.520 | 9.844  | 0.983 | 0.161 | 5.334 | 6.589 | 7.849    | 9.112  | 10.378 |
| 8.6    | 0.026   | 0.145 | 5.598 | 6.477 | 7.489    | 8.656 | 9.998  | 0.972 | 0.160 | 5.422 | 6.690 | 7.965    | 9.246  | 10.532 |
| 8.7    | 0.028   | 0.145 | 5.690 | 6.583 | 7.610    | 8.793 | 10.154 | 0.961 | 0.160 | 5.511 | 6.792 | 8.083    | 9.382  | 10.687 |
| 8.8    | 0.030   | 0.145 | 5.784 | 6.690 | 7.733    | 8.932 | 10.312 | 0.951 | 0.160 | 5.601 | 6.896 | 8.202    | 9.519  | 10.845 |
| 8.9    | 0.032   | 0.144 | 5.879 | 6.798 | 7.856    | 9.073 | 10.471 | 0.940 | 0.160 | 5.693 | 7.001 | 8.323    | 9.658  | 11.005 |
| 9.0    | 0.034   | 0.144 | 5.975 | 6.908 | 7.982    | 9.215 | 10.632 | 0.929 | 0.159 | 5.786 | 7.107 | 8.445    | 9.799  | 11.167 |
| 9.1    | 0.036   | 0.144 | 6.072 | 7.019 | 8.108    | 9.359 | 10.795 | 0.918 | 0.159 | 5.881 | 7.215 | 8.570    | 9.942  | 11.331 |
| 9.2    | 0.038   | 0.144 | 6.170 | 7.132 | 8.236    | 9.505 | 10.960 | 0.907 | 0.159 | 5.976 | 7.324 | 8.696    | 10.087 | 11.497 |
| 9.3    | 0.040   | 0.143 | 6.270 | 7.246 | 8.366    | 9.652 | 11.127 | 0.897 | 0.159 | 6.074 | 7.435 | 8.823    | 10.234 | 11.666 |
| 9.4    | 0.041   | 0.143 | 6.371 | 7.360 | 8.497    | 9.801 | 11.295 | 0.886 | 0.158 | 6.172 | 7.548 | 8.953    | 10.383 | 11.837 |
| 9.5    | 0.043   | 0.143 | 6.472 | 7.477 | 8.629    | 9.951 | 11.464 | 0.875 | 0.158 | 6.273 | 7.662 | 9.084    | 10.535 | 12.011 |



| Age, y | Females |       |        |        |          |        |        | Males  |       |        |        |          |        |        |
|--------|---------|-------|--------|--------|----------|--------|--------|--------|-------|--------|--------|----------|--------|--------|
|        | L       | S     | -2 SD  | -1 SD  | 0 SD (M) | 1 SD   | 2 SD   | L      | S     | -2 SD  | -1 SD  | 0 SD (M) | 1 SD   | 2 SD   |
| 16.4   | 0.177   | 0.128 | 11.577 | 13.217 | 15.043   | 17.073 | 19.322 | 0.131  | 0.142 | 14.869 | 17.200 | 19.842   | 22.830 | 26.201 |
| 16.5   | 0.179   | 0.128 | 11.603 | 13.244 | 15.072   | 17.101 | 19.349 | 0.120  | 0.141 | 14.952 | 17.286 | 19.934   | 22.933 | 26.323 |
| 16.6   | 0.181   | 0.128 | 11.628 | 13.271 | 15.099   | 17.128 | 19.375 | 0.109  | 0.141 | 15.033 | 17.369 | 20.023   | 23.033 | 26.439 |
| 16.7   | 0.183   | 0.127 | 11.652 | 13.296 | 15.125   | 17.154 | 19.400 | 0.099  | 0.141 | 15.111 | 17.449 | 20.109   | 23.128 | 26.551 |
| 16.8   | 0.185   | 0.127 | 11.676 | 13.321 | 15.150   | 17.179 | 19.424 | 0.088  | 0.141 | 15.186 | 17.526 | 20.191   | 23.220 | 26.659 |
| 16.9   | 0.187   | 0.127 | 11.699 | 13.345 | 15.174   | 17.203 | 19.446 | 0.077  | 0.140 | 15.259 | 17.600 | 20.270   | 23.308 | 26.762 |
| 17.0   | 0.189   | 0.127 | 11.721 | 13.368 | 15.198   | 17.226 | 19.468 | 0.066  | 0.140 | 15.330 | 17.672 | 20.345   | 23.392 | 26.861 |
| 17.1   | 0.191   | 0.127 | 11.743 | 13.390 | 15.220   | 17.248 | 19.488 | 0.056  | 0.140 | 15.398 | 17.741 | 20.417   | 23.472 | 26.956 |
| 17.2   | 0.193   | 0.126 | 11.764 | 13.412 | 15.242   | 17.269 | 19.507 | 0.045  | 0.140 | 15.464 | 17.807 | 20.486   | 23.549 | 27.046 |
| 17.3   | 0.194   | 0.126 | 11.785 | 13.433 | 15.263   | 17.289 | 19.526 | 0.034  | 0.140 | 15.527 | 17.870 | 20.552   | 23.622 | 27.132 |
| 17.4   | 0.196   | 0.126 | 11.805 | 13.454 | 15.284   | 17.308 | 19.543 | 0.023  | 0.139 | 15.588 | 17.930 | 20.615   | 23.691 | 27.215 |
| 17.5   | 0.198   | 0.126 | 11.824 | 13.474 | 15.303   | 17.327 | 19.560 | 0.012  | 0.139 | 15.647 | 17.988 | 20.675   | 23.757 | 27.293 |
| 17.6   | 0.200   | 0.126 | 11.843 | 13.493 | 15.322   | 17.345 | 19.575 | 0.002  | 0.139 | 15.704 | 18.044 | 20.732   | 23.820 | 27.367 |
| 17.7   | 0.202   | 0.125 | 11.861 | 13.512 | 15.341   | 17.362 | 19.590 | -0.009 | 0.139 | 15.758 | 18.097 | 20.786   | 23.879 | 27.438 |
| 17.8   | 0.204   | 0.125 | 11.879 | 13.530 | 15.358   | 17.378 | 19.604 | -0.020 | 0.138 | 15.811 | 18.147 | 20.837   | 23.935 | 27.505 |
| 17.9   | 0.206   | 0.125 | 11.897 | 13.548 | 15.376   | 17.394 | 19.617 | -0.031 | 0.138 | 15.861 | 18.196 | 20.886   | 23.988 | 27.568 |
| 18.0   | 0.208   | 0.125 | 11.914 | 13.565 | 15.392   | 17.409 | 19.630 | -0.042 | 0.138 | 15.909 | 18.241 | 20.932   | 24.038 | 27.627 |
| 18.1   | 0.210   | 0.125 | 11.930 | 13.581 | 15.408   | 17.423 | 19.641 | -0.052 | 0.138 | 15.956 | 18.285 | 20.975   | 24.085 | 27.684 |
| 18.2   | 0.212   | 0.124 | 11.946 | 13.597 | 15.423   | 17.437 | 19.652 | -0.063 | 0.138 | 16.000 | 18.326 | 21.016   | 24.129 | 27.737 |
| 18.3   | 0.214   | 0.124 | 11.962 | 13.613 | 15.438   | 17.450 | 19.663 | -0.074 | 0.137 | 16.042 | 18.366 | 21.054   | 24.170 | 27.787 |
| 18.4   | 0.216   | 0.124 | 11.977 | 13.628 | 15.452   | 17.463 | 19.672 | -0.085 | 0.137 | 16.083 | 18.403 | 21.090   | 24.209 | 27.833 |
| 18.5   | 0.218   | 0.124 | 11.992 | 13.643 | 15.466   | 17.475 | 19.681 | -0.095 | 0.137 | 16.122 | 18.439 | 21.124   | 24.245 | 27.877 |
| 18.6   | 0.220   | 0.124 | 12.007 | 13.657 | 15.479   | 17.486 | 19.690 | -0.106 | 0.137 | 16.160 | 18.472 | 21.156   | 24.278 | 27.918 |
| 18.7   | 0.222   | 0.123 | 12.021 | 13.671 | 15.492   | 17.497 | 19.698 | -0.117 | 0.136 | 16.196 | 18.504 | 21.186   | 24.310 | 27.957 |
| 18.8   | 0.224   | 0.123 | 12.035 | 13.685 | 15.505   | 17.508 | 19.705 | -0.128 | 0.136 | 16.230 | 18.534 | 21.214   | 24.339 | 27.992 |
| 18.9   | 0.225   | 0.123 | 12.049 | 13.698 | 15.517   | 17.518 | 19.712 | -0.139 | 0.136 | 16.263 | 18.563 | 21.240   | 24.366 | 28.026 |
| 19.0   | 0.227   | 0.123 | 12.063 | 13.711 | 15.529   | 17.527 | 19.719 | -0.149 | 0.136 | 16.295 | 18.590 | 21.264   | 24.391 | 28.057 |
| 19.1   | 0.229   | 0.123 | 12.076 | 13.724 | 15.541   | 17.537 | 19.725 | -0.160 | 0.136 | 16.325 | 18.615 | 21.287   | 24.414 | 28.086 |
| 19.2   | 0.231   | 0.122 | 12.089 | 13.737 | 15.552   | 17.546 | 19.731 | -0.171 | 0.135 | 16.354 | 18.640 | 21.308   | 24.435 | 28.113 |
| 19.3   | 0.233   | 0.122 | 12.102 | 13.749 | 15.563   | 17.555 | 19.737 | -0.182 | 0.135 | 16.382 | 18.663 | 21.328   | 24.455 | 28.138 |
| 19.4   | 0.235   | 0.122 | 12.114 | 13.761 | 15.574   | 17.563 | 19.742 | -0.193 | 0.135 | 16.409 | 18.685 | 21.347   | 24.473 | 28.162 |
| 19.5   | 0.237   | 0.122 | 12.127 | 13.773 | 15.584   | 17.572 | 19.747 | -0.203 | 0.135 | 16.436 | 18.706 | 21.364   | 24.490 | 28.183 |
| 19.6   | 0.239   | 0.122 | 12.139 | 13.785 | 15.595   | 17.580 | 19.752 | -0.214 | 0.134 | 16.461 | 18.726 | 21.380   | 24.506 | 28.204 |
| 19.7   | 0.241   | 0.121 | 12.152 | 13.797 | 15.605   | 17.588 | 19.757 | -0.225 | 0.134 | 16.485 | 18.745 | 21.395   | 24.520 | 28.223 |
| 19.8   | 0.243   | 0.121 | 12.164 | 13.808 | 15.615   | 17.596 | 19.762 | -0.236 | 0.134 | 16.509 | 18.763 | 21.410   | 24.533 | 28.240 |
| 19.9   | 0.245   | 0.121 | 12.176 | 13.820 | 15.626   | 17.604 | 19.767 | -0.246 | 0.134 | 16.532 | 18.780 | 21.423   | 24.546 | 28.257 |
| 20.0   | 0.247   | 0.121 | 12.189 | 13.832 | 15.636   | 17.612 | 19.771 | -0.257 | 0.134 | 16.554 | 18.797 | 21.436   | 24.558 | 28.273 |

**Table S33. Fat Mass, kg**

| Non-Black Children |         |       |       |       |          |        |        |        |       |       |       |          |        |        |
|--------------------|---------|-------|-------|-------|----------|--------|--------|--------|-------|-------|-------|----------|--------|--------|
| Age, y             | Females |       |       |       |          |        |        | Males  |       |       |       |          |        |        |
|                    | L       | S     | -2 SD | -1 SD | 0 SD (M) | 1 SD   | 2 SD   | L      | S     | -2 SD | -1 SD | 0 SD (M) | 1 SD   | 2 SD   |
| 5.0                | -0.204  | 0.235 | 2.980 | 3.712 | 4.672    | 5.947  | 7.665  | -0.181 | 0.237 | 2.631 | 3.286 | 4.143    | 5.276  | 6.794  |
| 5.1                | -0.204  | 0.238 | 3.017 | 3.765 | 4.749    | 6.059  | 7.831  | -0.184 | 0.239 | 2.644 | 3.309 | 4.182    | 5.342  | 6.902  |
| 5.2                | -0.205  | 0.240 | 3.053 | 3.818 | 4.826    | 6.173  | 8.000  | -0.186 | 0.242 | 2.656 | 3.332 | 4.222    | 5.409  | 7.012  |
| 5.3                | -0.206  | 0.242 | 3.089 | 3.870 | 4.903    | 6.287  | 8.170  | -0.189 | 0.245 | 2.669 | 3.355 | 4.262    | 5.476  | 7.124  |
| 5.4                | -0.207  | 0.245 | 3.125 | 3.923 | 4.980    | 6.402  | 8.343  | -0.192 | 0.248 | 2.682 | 3.379 | 4.303    | 5.545  | 7.239  |
| 5.5                | -0.207  | 0.247 | 3.160 | 3.975 | 5.058    | 6.517  | 8.517  | -0.195 | 0.250 | 2.694 | 3.402 | 4.344    | 5.615  | 7.357  |
| 5.6                | -0.208  | 0.249 | 3.195 | 4.027 | 5.135    | 6.634  | 8.695  | -0.198 | 0.253 | 2.707 | 3.426 | 4.386    | 5.686  | 7.477  |
| 5.7                | -0.209  | 0.252 | 3.230 | 4.079 | 5.213    | 6.752  | 8.875  | -0.200 | 0.256 | 2.719 | 3.449 | 4.428    | 5.759  | 7.600  |
| 5.8                | -0.209  | 0.254 | 3.264 | 4.130 | 5.291    | 6.871  | 9.057  | -0.203 | 0.259 | 2.732 | 3.473 | 4.471    | 5.833  | 7.727  |
| 5.9                | -0.210  | 0.257 | 3.298 | 4.182 | 5.370    | 6.990  | 9.243  | -0.206 | 0.262 | 2.745 | 3.498 | 4.514    | 5.908  | 7.857  |
| 6.0                | -0.211  | 0.259 | 3.332 | 4.234 | 5.448    | 7.111  | 9.431  | -0.209 | 0.265 | 2.758 | 3.523 | 4.558    | 5.986  | 7.990  |
| 6.1                | -0.211  | 0.262 | 3.365 | 4.285 | 5.527    | 7.234  | 9.622  | -0.211 | 0.268 | 2.772 | 3.548 | 4.604    | 6.065  | 8.128  |
| 6.2                | -0.212  | 0.264 | 3.399 | 4.337 | 5.607    | 7.357  | 9.816  | -0.214 | 0.271 | 2.786 | 3.574 | 4.650    | 6.146  | 8.269  |
| 6.3                | -0.213  | 0.267 | 3.432 | 4.388 | 5.687    | 7.482  | 10.013 | -0.217 | 0.274 | 2.800 | 3.600 | 4.697    | 6.230  | 8.415  |
| 6.4                | -0.213  | 0.269 | 3.465 | 4.440 | 5.767    | 7.608  | 10.213 | -0.220 | 0.277 | 2.814 | 3.627 | 4.746    | 6.315  | 8.566  |
| 6.5                | -0.214  | 0.272 | 3.499 | 4.491 | 5.848    | 7.736  | 10.417 | -0.223 | 0.280 | 2.830 | 3.655 | 4.796    | 6.404  | 8.722  |
| 6.6                | -0.215  | 0.274 | 3.532 | 4.543 | 5.930    | 7.865  | 10.625 | -0.225 | 0.283 | 2.845 | 3.684 | 4.848    | 6.495  | 8.883  |
| 6.7                | -0.215  | 0.277 | 3.565 | 4.596 | 6.012    | 7.996  | 10.836 | -0.228 | 0.286 | 2.862 | 3.714 | 4.901    | 6.588  | 9.050  |
| 6.8                | -0.216  | 0.279 | 3.598 | 4.648 | 6.095    | 8.129  | 11.051 | -0.231 | 0.289 | 2.879 | 3.745 | 4.955    | 6.685  | 9.222  |
| 6.9                | -0.217  | 0.282 | 3.631 | 4.700 | 6.179    | 8.263  | 11.269 | -0.234 | 0.292 | 2.896 | 3.777 | 5.012    | 6.785  | 9.401  |
| 7.0                | -0.218  | 0.284 | 3.664 | 4.753 | 6.263    | 8.399  | 11.491 | -0.237 | 0.296 | 2.915 | 3.809 | 5.070    | 6.888  | 9.585  |
| 7.1                | -0.218  | 0.287 | 3.698 | 4.806 | 6.348    | 8.537  | 11.717 | -0.239 | 0.299 | 2.934 | 3.843 | 5.129    | 6.994  | 9.776  |
| 7.2                | -0.219  | 0.289 | 3.731 | 4.860 | 6.434    | 8.676  | 11.947 | -0.242 | 0.302 | 2.954 | 3.878 | 5.191    | 7.103  | 9.973  |
| 7.3                | -0.220  | 0.292 | 3.765 | 4.914 | 6.521    | 8.817  | 12.180 | -0.245 | 0.305 | 2.974 | 3.914 | 5.254    | 7.215  | 10.177 |
| 7.4                | -0.220  | 0.294 | 3.798 | 4.968 | 6.608    | 8.960  | 12.418 | -0.248 | 0.308 | 2.996 | 3.951 | 5.318    | 7.330  | 10.387 |
| 7.5                | -0.221  | 0.297 | 3.832 | 5.023 | 6.697    | 9.105  | 12.659 | -0.251 | 0.312 | 3.018 | 3.989 | 5.385    | 7.449  | 10.604 |
| 7.6                | -0.222  | 0.300 | 3.867 | 5.078 | 6.786    | 9.251  | 12.904 | -0.253 | 0.315 | 3.040 | 4.028 | 5.453    | 7.570  | 10.828 |
| 7.7                | -0.222  | 0.302 | 3.901 | 5.133 | 6.876    | 9.400  | 13.153 | -0.256 | 0.318 | 3.064 | 4.068 | 5.523    | 7.695  | 11.058 |
| 7.8                | -0.223  | 0.304 | 3.936 | 5.189 | 6.967    | 9.550  | 13.406 | -0.259 | 0.321 | 3.088 | 4.109 | 5.594    | 7.823  | 11.295 |
| 7.9                | -0.224  | 0.307 | 3.971 | 5.246 | 7.059    | 9.701  | 13.662 | -0.262 | 0.324 | 3.113 | 4.151 | 5.667    | 7.954  | 11.539 |
| 8.0                | -0.224  | 0.309 | 4.006 | 5.303 | 7.151    | 9.855  | 13.922 | -0.264 | 0.328 | 3.138 | 4.194 | 5.742    | 8.088  | 11.789 |
| 8.1                | -0.225  | 0.312 | 4.042 | 5.360 | 7.245    | 10.010 | 14.186 | -0.267 | 0.331 | 3.164 | 4.237 | 5.817    | 8.224  | 12.045 |
| 8.2                | -0.226  | 0.314 | 4.078 | 5.418 | 7.339    | 10.167 | 14.453 | -0.270 | 0.334 | 3.191 | 4.282 | 5.895    | 8.364  | 12.308 |
| 8.3                | -0.226  | 0.317 | 4.115 | 5.477 | 7.435    | 10.325 | 14.724 | -0.273 | 0.337 | 3.218 | 4.327 | 5.973    | 8.505  | 12.577 |
| 8.4                | -0.227  | 0.319 | 4.152 | 5.536 | 7.531    | 10.485 | 14.997 | -0.276 | 0.340 | 3.245 | 4.373 | 6.052    | 8.649  | 12.851 |
| 8.5                | -0.228  | 0.321 | 4.189 | 5.595 | 7.628    | 10.647 | 15.274 | -0.278 | 0.343 | 3.273 | 4.419 | 6.132    | 8.795  | 13.131 |
| 8.6                | -0.229  | 0.323 | 4.227 | 5.655 | 7.726    | 10.810 | 15.554 | -0.281 | 0.346 | 3.301 | 4.466 | 6.214    | 8.943  | 13.417 |
| 8.7                | -0.229  | 0.326 | 4.265 | 5.716 | 7.824    | 10.974 | 15.836 | -0.284 | 0.349 | 3.330 | 4.513 | 6.296    | 9.092  | 13.707 |
| 8.8                | -0.230  | 0.328 | 4.304 | 5.778 | 7.924    | 11.140 | 16.121 | -0.287 | 0.352 | 3.359 | 4.561 | 6.378    | 9.244  | 14.002 |
| 8.9                | -0.231  | 0.330 | 4.343 | 5.840 | 8.024    | 11.307 | 16.409 | -0.290 | 0.355 | 3.388 | 4.609 | 6.462    | 9.396  | 14.302 |
| 9.0                | -0.231  | 0.332 | 4.383 | 5.902 | 8.125    | 11.475 | 16.699 | -0.292 | 0.358 | 3.418 | 4.658 | 6.545    | 9.550  | 14.605 |
| 9.1                | -0.232  | 0.334 | 4.423 | 5.965 | 8.227    | 11.644 | 16.991 | -0.295 | 0.361 | 3.448 | 4.706 | 6.629    | 9.705  | 14.913 |
| 9.2                | -0.233  | 0.336 | 4.464 | 6.029 | 8.330    | 11.815 | 17.284 | -0.298 | 0.363 | 3.478 | 4.755 | 6.713    | 9.860  | 15.223 |
| 9.3                | -0.233  | 0.338 | 4.506 | 6.094 | 8.433    | 11.986 | 17.580 | -0.301 | 0.366 | 3.508 | 4.803 | 6.797    | 10.016 | 15.536 |
| 9.4                | -0.234  | 0.339 | 4.548 | 6.159 | 8.537    | 12.158 | 17.876 | -0.304 | 0.369 | 3.538 | 4.852 | 6.881    | 10.172 | 15.852 |
| 9.5                | -0.235  | 0.341 | 4.590 | 6.225 | 8.642    | 12.331 | 18.174 | -0.306 | 0.371 | 3.568 | 4.900 | 6.965    | 10.329 | 16.170 |
| 9.6                | -0.235  | 0.343 | 4.634 | 6.291 | 8.748    | 12.505 | 18.473 | -0.309 | 0.374 | 3.598 | 4.949 | 7.048    | 10.485 | 16.489 |
| 9.7                | -0.236  | 0.344 | 4.678 | 6.359 | 8.854    | 12.679 | 18.772 | -0.312 | 0.376 | 3.628 | 4.997 | 7.131    | 10.640 | 16.808 |
| 9.8                | -0.237  | 0.346 | 4.722 | 6.427 | 8.961    | 12.854 | 19.072 | -0.315 | 0.379 | 3.658 | 5.045 | 7.214    | 10.795 | 17.129 |
| 9.9                | -0.237  | 0.347 | 4.768 | 6.495 | 9.068    | 13.029 | 19.372 | -0.317 | 0.381 | 3.688 | 5.092 | 7.296    | 10.949 | 17.450 |
| 10.0               | -0.238  | 0.349 | 4.814 | 6.565 | 9.176    | 13.205 | 19.671 | -0.320 | 0.383 | 3.718 | 5.140 | 7.377    | 11.102 | 17.770 |
| 10.1               | -0.239  | 0.350 | 4.861 | 6.635 | 9.285    | 13.381 | 19.970 | -0.323 | 0.385 | 3.747 | 5.186 | 7.457    | 11.253 | 18.089 |
| 10.2               | -0.240  | 0.351 | 4.909 | 6.705 | 9.394    | 13.557 | 20.268 | -0.326 | 0.387 | 3.777 | 5.233 | 7.537    | 11.403 | 18.407 |
| 10.3               | -0.240  | 0.352 | 4.957 | 6.777 | 9.504    | 13.733 | 20.565 | -0.329 | 0.389 | 3.806 | 5.278 | 7.615    | 11.552 | 18.724 |
| 10.4               | -0.241  | 0.353 | 5.006 | 6.849 | 9.614    | 13.909 | 20.860 | -0.331 | 0.391 | 3.835 | 5.324 | 7.692    | 11.698 | 19.038 |
| 10.5               | -0.242  | 0.354 | 5.056 | 6.922 | 9.725    | 14.084 | 21.154 | -0.334 | 0.393 | 3.864 | 5.368 | 7.768    | 11.842 | 19.348 |
| 10.6               | -0.242  | 0.355 | 5.107 | 6.996 | 9.836    | 14.260 | 21.446 | -0.337 | 0.395 | 3.892 | 5.412 | 7.843    | 11.984 | 19.656 |
| 10.7               | -0.243  | 0.356 | 5.159 | 7.071 | 9.948    | 14.435 | 21.736 | -0.340 | 0.397 | 3.921 | 5.456 | 7.916    | 12.123 | 19.960 |
| 10.8               | -0.244  | 0.357 | 5.212 | 7.146 | 10.060   | 14.610 | 22.024 | -0.343 | 0.398 | 3.949 | 5.498 | 7.988    | 12.260 | 20.260 |
| 10.9               | -0.244  | 0.357 | 5.265 | 7.222 | 10.173   | 14.784 | 22.308 | -0.345 | 0.400 | 3.976 | 5.540 | 8.059    | 12.394 | 20.555 |
| 11.0               | -0.245  | 0.358 | 5.320 | 7.299 | 10.286   | 14.957 | 22.590 | -0.348 | 0.402 | 4.004 | 5.582 | 8.128    | 12.526 | 20.845 |
| 11.1               | -0.246  | 0.358 | 5.375 | 7.377 | 10.399   | 15.130 | 22.869 | -0.351 | 0.403 | 4.031 | 5.622 | 8.195    | 12.654 | 21.131 |
| 11.2               | -0.246  | 0.359 | 5.432 | 7.456 | 10.513   | 15.303 | 23.144 | -0.354 | 0.404 | 4.057 | 5.662 | 8.261    | 12.779 | 21.410 |
| 11.3               | -0.247  | 0.359 | 5.489 | 7.535 | 10.627   | 15.474 | 23.416 | -0.357 | 0.405 | 4.084 | 5.701 | 8.326    | 12.901 | 21.684 |
| 11.4               | -0.248  | 0.359 | 5.547 | 7.615 | 10.741   | 15.644 | 23.683 | -0.359 | 0.407 | 4.110 | 5.739 | 8.388    | 13.020 | 21.951 |



| Age, y | Females |       |        |        |          |        |        | Males  |       |       |       |          |        |        |
|--------|---------|-------|--------|--------|----------|--------|--------|--------|-------|-------|-------|----------|--------|--------|
|        | L       | S     | -2 SD  | -1 SD  | 0 SD (M) | 1 SD   | 2 SD   | L      | S     | -2 SD | -1 SD | 0 SD (M) | 1 SD   | 2 SD   |
| 18.3   | -0.295  | 0.323 | 9.748  | 12.931 | 17.599   | 24.704 | 36.011 | -0.552 | 0.389 | 5.881 | 7.898 | 11.235   | 17.408 | 31.048 |
| 18.4   | -0.296  | 0.323 | 9.781  | 12.977 | 17.668   | 24.813 | 36.195 | -0.555 | 0.389 | 5.915 | 7.940 | 11.290   | 17.491 | 31.219 |
| 18.5   | -0.297  | 0.324 | 9.814  | 13.023 | 17.737   | 24.922 | 36.381 | -0.557 | 0.388 | 5.950 | 7.982 | 11.345   | 17.574 | 31.393 |
| 18.6   | -0.297  | 0.324 | 9.845  | 13.068 | 17.805   | 25.031 | 36.567 | -0.560 | 0.388 | 5.984 | 8.024 | 11.400   | 17.659 | 31.570 |
| 18.7   | -0.298  | 0.324 | 9.876  | 13.113 | 17.872   | 25.139 | 36.755 | -0.563 | 0.388 | 6.019 | 8.067 | 11.456   | 17.745 | 31.751 |
| 18.8   | -0.299  | 0.325 | 9.906  | 13.156 | 17.939   | 25.248 | 36.943 | -0.566 | 0.388 | 6.054 | 8.109 | 11.513   | 17.831 | 31.934 |
| 18.9   | -0.299  | 0.325 | 9.935  | 13.199 | 18.005   | 25.356 | 37.133 | -0.568 | 0.387 | 6.089 | 8.152 | 11.569   | 17.918 | 32.121 |
| 19.0   | -0.300  | 0.326 | 9.963  | 13.241 | 18.070   | 25.464 | 37.324 | -0.571 | 0.387 | 6.123 | 8.195 | 11.626   | 18.006 | 32.310 |
| 19.1   | -0.301  | 0.326 | 9.991  | 13.283 | 18.135   | 25.572 | 37.515 | -0.574 | 0.387 | 6.158 | 8.237 | 11.683   | 18.095 | 32.502 |
| 19.2   | -0.301  | 0.327 | 10.019 | 13.323 | 18.200   | 25.679 | 37.708 | -0.577 | 0.387 | 6.193 | 8.280 | 11.740   | 18.184 | 32.697 |
| 19.3   | -0.302  | 0.328 | 10.046 | 13.364 | 18.264   | 25.787 | 37.901 | -0.580 | 0.387 | 6.228 | 8.323 | 11.797   | 18.274 | 32.894 |
| 19.4   | -0.303  | 0.328 | 10.072 | 13.403 | 18.327   | 25.894 | 38.095 | -0.582 | 0.386 | 6.263 | 8.366 | 11.854   | 18.364 | 33.093 |
| 19.5   | -0.304  | 0.329 | 10.098 | 13.443 | 18.390   | 26.001 | 38.290 | -0.585 | 0.386 | 6.298 | 8.409 | 11.912   | 18.455 | 33.295 |
| 19.6   | -0.304  | 0.329 | 10.123 | 13.481 | 18.452   | 26.108 | 38.485 | -0.588 | 0.386 | 6.333 | 8.452 | 11.970   | 18.546 | 33.499 |
| 19.7   | -0.305  | 0.330 | 10.148 | 13.519 | 18.514   | 26.214 | 38.681 | -0.591 | 0.386 | 6.368 | 8.496 | 12.027   | 18.637 | 33.704 |
| 19.8   | -0.306  | 0.331 | 10.172 | 13.557 | 18.576   | 26.320 | 38.878 | -0.594 | 0.386 | 6.403 | 8.539 | 12.085   | 18.729 | 33.912 |
| 19.9   | -0.306  | 0.331 | 10.196 | 13.595 | 18.637   | 26.427 | 39.075 | -0.596 | 0.386 | 6.438 | 8.582 | 12.143   | 18.822 | 34.121 |
| 20.0   | -0.307  | 0.332 | 10.220 | 13.632 | 18.697   | 26.532 | 39.272 | -0.599 | 0.386 | 6.473 | 8.625 | 12.202   | 18.914 | 34.332 |

**Black Children**

| Age, y | Females |       |       |       |          |        |        | Males  |       |       |       |          |       |        |
|--------|---------|-------|-------|-------|----------|--------|--------|--------|-------|-------|-------|----------|-------|--------|
|        | L       | S     | -2 SD | -1 SD | 0 SD (M) | 1 SD   | 2 SD   | L      | S     | -2 SD | -1 SD | 0 SD (M) | 1 SD  | 2 SD   |
| 5.0    | 0.082   | 0.297 | 2.468 | 3.360 | 4.539    | 6.088  | 8.110  | -0.461 | 0.251 | 2.249 | 2.786 | 3.535    | 4.617 | 6.262  |
| 5.1    | 0.080   | 0.299 | 2.496 | 3.404 | 4.607    | 6.191  | 8.262  | -0.462 | 0.255 | 2.273 | 2.822 | 3.590    | 4.707 | 6.416  |
| 5.2    | 0.078   | 0.301 | 2.525 | 3.448 | 4.675    | 6.293  | 8.415  | -0.463 | 0.258 | 2.296 | 2.858 | 3.646    | 4.799 | 6.573  |
| 5.3    | 0.076   | 0.303 | 2.553 | 3.492 | 4.742    | 6.396  | 8.570  | -0.464 | 0.261 | 2.319 | 2.894 | 3.702    | 4.891 | 6.733  |
| 5.4    | 0.074   | 0.304 | 2.580 | 3.536 | 4.810    | 6.500  | 8.726  | -0.465 | 0.264 | 2.342 | 2.929 | 3.758    | 4.983 | 6.896  |
| 5.5    | 0.072   | 0.306 | 2.608 | 3.580 | 4.879    | 6.605  | 8.885  | -0.466 | 0.268 | 2.365 | 2.964 | 3.814    | 5.077 | 7.063  |
| 5.6    | 0.070   | 0.308 | 2.636 | 3.624 | 4.948    | 6.711  | 9.045  | -0.467 | 0.271 | 2.387 | 2.999 | 3.871    | 5.172 | 7.234  |
| 5.7    | 0.067   | 0.310 | 2.664 | 3.668 | 5.017    | 6.818  | 9.208  | -0.468 | 0.275 | 2.409 | 3.033 | 3.927    | 5.268 | 7.408  |
| 5.8    | 0.065   | 0.312 | 2.692 | 3.713 | 5.087    | 6.926  | 9.373  | -0.469 | 0.278 | 2.430 | 3.067 | 3.983    | 5.365 | 7.586  |
| 5.9    | 0.063   | 0.314 | 2.719 | 3.757 | 5.158    | 7.036  | 9.540  | -0.470 | 0.281 | 2.452 | 3.101 | 4.040    | 5.464 | 7.769  |
| 6.0    | 0.061   | 0.315 | 2.747 | 3.802 | 5.229    | 7.147  | 9.711  | -0.471 | 0.285 | 2.472 | 3.135 | 4.096    | 5.563 | 7.956  |
| 6.1    | 0.059   | 0.317 | 2.775 | 3.847 | 5.300    | 7.259  | 9.883  | -0.472 | 0.289 | 2.493 | 3.169 | 4.153    | 5.663 | 8.147  |
| 6.2    | 0.057   | 0.319 | 2.804 | 3.893 | 5.373    | 7.373  | 10.059 | -0.473 | 0.292 | 2.513 | 3.202 | 4.210    | 5.765 | 8.342  |
| 6.3    | 0.055   | 0.321 | 2.832 | 3.939 | 5.447    | 7.488  | 10.238 | -0.474 | 0.296 | 2.533 | 3.235 | 4.267    | 5.868 | 8.543  |
| 6.4    | 0.053   | 0.323 | 2.861 | 3.986 | 5.521    | 7.605  | 10.420 | -0.476 | 0.299 | 2.553 | 3.268 | 4.324    | 5.972 | 8.748  |
| 6.5    | 0.051   | 0.325 | 2.890 | 4.033 | 5.597    | 7.724  | 10.606 | -0.477 | 0.303 | 2.573 | 3.301 | 4.382    | 6.078 | 8.959  |
| 6.6    | 0.049   | 0.327 | 2.920 | 4.081 | 5.673    | 7.846  | 10.795 | -0.478 | 0.307 | 2.592 | 3.334 | 4.439    | 6.185 | 9.175  |
| 6.7    | 0.047   | 0.329 | 2.949 | 4.129 | 5.751    | 7.969  | 10.987 | -0.479 | 0.310 | 2.611 | 3.367 | 4.497    | 6.294 | 9.396  |
| 6.8    | 0.045   | 0.331 | 2.980 | 4.178 | 5.830    | 8.094  | 11.184 | -0.480 | 0.314 | 2.631 | 3.400 | 4.556    | 6.404 | 9.622  |
| 6.9    | 0.043   | 0.332 | 3.010 | 4.228 | 5.910    | 8.222  | 11.384 | -0.481 | 0.318 | 2.650 | 3.433 | 4.614    | 6.515 | 9.855  |
| 7.0    | 0.041   | 0.334 | 3.042 | 4.279 | 5.992    | 8.351  | 11.589 | -0.482 | 0.322 | 2.669 | 3.465 | 4.673    | 6.628 | 10.093 |
| 7.1    | 0.039   | 0.336 | 3.073 | 4.331 | 6.075    | 8.483  | 11.797 | -0.483 | 0.325 | 2.687 | 3.498 | 4.732    | 6.743 | 10.337 |
| 7.2    | 0.037   | 0.338 | 3.106 | 4.383 | 6.159    | 8.618  | 12.009 | -0.484 | 0.329 | 2.706 | 3.531 | 4.792    | 6.859 | 10.587 |
| 7.3    | 0.035   | 0.340 | 3.138 | 4.436 | 6.244    | 8.754  | 12.225 | -0.485 | 0.333 | 2.725 | 3.563 | 4.852    | 6.976 | 10.843 |
| 7.4    | 0.033   | 0.342 | 3.172 | 4.490 | 6.331    | 8.893  | 12.445 | -0.486 | 0.337 | 2.743 | 3.596 | 4.912    | 7.095 | 11.105 |
| 7.5    | 0.031   | 0.343 | 3.206 | 4.545 | 6.420    | 9.035  | 12.669 | -0.487 | 0.340 | 2.762 | 3.629 | 4.972    | 7.215 | 11.373 |
| 7.6    | 0.029   | 0.345 | 3.241 | 4.601 | 6.510    | 9.178  | 12.897 | -0.488 | 0.344 | 2.780 | 3.661 | 5.033    | 7.337 | 11.648 |
| 7.7    | 0.027   | 0.347 | 3.276 | 4.658 | 6.601    | 9.324  | 13.129 | -0.489 | 0.348 | 2.798 | 3.694 | 5.094    | 7.460 | 11.929 |
| 7.8    | 0.025   | 0.349 | 3.313 | 4.716 | 6.694    | 9.473  | 13.365 | -0.490 | 0.352 | 2.817 | 3.726 | 5.155    | 7.584 | 12.216 |
| 7.9    | 0.023   | 0.350 | 3.349 | 4.775 | 6.788    | 9.623  | 13.605 | -0.491 | 0.355 | 2.835 | 3.759 | 5.216    | 7.710 | 12.509 |
| 8.0    | 0.021   | 0.352 | 3.387 | 4.835 | 6.884    | 9.776  | 13.849 | -0.493 | 0.359 | 2.853 | 3.792 | 5.278    | 7.837 | 12.808 |
| 8.1    | 0.019   | 0.354 | 3.426 | 4.896 | 6.981    | 9.932  | 14.096 | -0.494 | 0.363 | 2.872 | 3.824 | 5.340    | 7.965 | 13.114 |
| 8.2    | 0.017   | 0.355 | 3.465 | 4.958 | 7.080    | 10.089 | 14.347 | -0.495 | 0.367 | 2.890 | 3.857 | 5.402    | 8.094 | 13.425 |
| 8.3    | 0.015   | 0.357 | 3.505 | 5.022 | 7.180    | 10.249 | 14.601 | -0.496 | 0.370 | 2.908 | 3.890 | 5.464    | 8.224 | 13.742 |
| 8.4    | 0.012   | 0.358 | 3.546 | 5.086 | 7.282    | 10.410 | 14.859 | -0.497 | 0.374 | 2.927 | 3.922 | 5.526    | 8.355 | 14.065 |
| 8.5    | 0.010   | 0.360 | 3.588 | 5.151 | 7.385    | 10.574 | 15.119 | -0.498 | 0.377 | 2.945 | 3.955 | 5.588    | 8.487 | 14.394 |
| 8.6    | 0.008   | 0.361 | 3.631 | 5.218 | 7.490    | 10.740 | 15.383 | -0.499 | 0.381 | 2.963 | 3.987 | 5.650    | 8.619 | 14.727 |
| 8.7    | 0.006   | 0.362 | 3.674 | 5.285 | 7.596    | 10.907 | 15.650 | -0.500 | 0.384 | 2.982 | 4.020 | 5.713    | 8.753 | 15.066 |
| 8.8    | 0.004   | 0.364 | 3.719 | 5.354 | 7.703    | 11.077 | 15.919 | -0.501 | 0.388 | 3.000 | 4.052 | 5.775    | 8.886 | 15.409 |
| 8.9    | 0.002   | 0.365 | 3.764 | 5.424 | 7.812    | 11.248 | 16.191 | -0.502 | 0.391 | 3.018 | 4.085 | 5.837    | 9.021 | 15.757 |
| 9.0    | 0.000   | 0.366 | 3.811 | 5.494 | 7.922    | 11.421 | 16.465 | -0.503 | 0.394 | 3.037 | 4.117 | 5.899    | 9.155 | 16.109 |
| 9.1    | -0.002  | 0.367 | 3.858 | 5.566 | 8.033    | 11.595 | 16.742 | -0.504 | 0.397 | 3.055 | 4.150 | 5.962    | 9.290 | 16.464 |
| 9.2    | -0.004  | 0.368 | 3.906 | 5.639 | 8.145    | 11.771 | 17.020 | -0.505 | 0.401 | 3.074 | 4.182 | 6.023    | 9.425 | 16.824 |
| 9.3    | -0.006  | 0.369 | 3.955 | 5.713 | 8.259    | 11.948 | 17.300 | -0.506 | 0.404 | 3.092 | 4.214 | 6.085    | 9.559 | 17.186 |
| 9.4    | -0.008  | 0.370 | 4.005 | 5.788 | 8.374    | 12.127 | 17.582 | -0.507 | 0.407 | 3.111 | 4.247 | 6.147    | 9.694 | 17.551 |
| 9.5    | -0.010  | 0.371 | 4.056 | 5.864 | 8.490    | 12.307 | 17.865 | -0.508 | 0.410 | 3.129 | 4.279 | 6.208    | 9.828 | 17.918 |





| Age, y | Females |       |       |        |          |        |        | Males  |       |       |       |          |        |        |
|--------|---------|-------|-------|--------|----------|--------|--------|--------|-------|-------|-------|----------|--------|--------|
|        | L       | S     | -2 SD | -1 SD  | 0 SD (M) | 1 SD   | 2 SD   | L      | S     | -2 SD | -1 SD | 0 SD (M) | 1 SD   | 2 SD   |
| 16.4   | -0.150  | 0.350 | 8.589 | 11.886 | 16.724   | 23.971 | 35.073 | -0.582 | 0.422 | 4.550 | 6.197 | 9.035    | 14.653 | 28.792 |
| 16.5   | -0.152  | 0.351 | 8.625 | 11.940 | 16.814   | 24.126 | 35.354 | -0.583 | 0.421 | 4.565 | 6.215 | 9.058    | 14.687 | 28.855 |
| 16.6   | -0.154  | 0.352 | 8.659 | 11.993 | 16.902   | 24.281 | 35.639 | -0.584 | 0.421 | 4.579 | 6.233 | 9.081    | 14.721 | 28.921 |
| 16.7   | -0.156  | 0.353 | 8.691 | 12.045 | 16.989   | 24.437 | 35.929 | -0.585 | 0.421 | 4.593 | 6.251 | 9.104    | 14.755 | 28.990 |
| 16.8   | -0.159  | 0.354 | 8.721 | 12.094 | 17.075   | 24.593 | 36.223 | -0.586 | 0.420 | 4.607 | 6.268 | 9.127    | 14.789 | 29.062 |
| 16.9   | -0.161  | 0.356 | 8.750 | 12.142 | 17.160   | 24.749 | 36.522 | -0.587 | 0.420 | 4.621 | 6.285 | 9.149    | 14.824 | 29.137 |
| 17.0   | -0.163  | 0.357 | 8.777 | 12.189 | 17.244   | 24.906 | 36.825 | -0.588 | 0.420 | 4.634 | 6.301 | 9.171    | 14.858 | 29.214 |
| 17.1   | -0.165  | 0.358 | 8.802 | 12.233 | 17.326   | 25.063 | 37.132 | -0.589 | 0.420 | 4.647 | 6.317 | 9.193    | 14.893 | 29.294 |
| 17.2   | -0.167  | 0.360 | 8.826 | 12.277 | 17.407   | 25.220 | 37.444 | -0.590 | 0.420 | 4.660 | 6.333 | 9.215    | 14.928 | 29.377 |
| 17.3   | -0.169  | 0.361 | 8.849 | 12.318 | 17.487   | 25.378 | 37.760 | -0.591 | 0.420 | 4.672 | 6.349 | 9.236    | 14.963 | 29.461 |
| 17.4   | -0.171  | 0.362 | 8.870 | 12.358 | 17.566   | 25.536 | 38.081 | -0.592 | 0.420 | 4.684 | 6.364 | 9.258    | 14.998 | 29.548 |
| 17.5   | -0.173  | 0.364 | 8.889 | 12.397 | 17.644   | 25.694 | 38.406 | -0.593 | 0.420 | 4.696 | 6.379 | 9.278    | 15.033 | 29.637 |
| 17.6   | -0.175  | 0.365 | 8.907 | 12.434 | 17.721   | 25.852 | 38.736 | -0.595 | 0.420 | 4.707 | 6.394 | 9.299    | 15.068 | 29.728 |
| 17.7   | -0.177  | 0.367 | 8.924 | 12.470 | 17.796   | 26.011 | 39.070 | -0.596 | 0.420 | 4.719 | 6.408 | 9.319    | 15.103 | 29.821 |
| 17.8   | -0.179  | 0.369 | 8.940 | 12.505 | 17.871   | 26.170 | 39.410 | -0.597 | 0.420 | 4.730 | 6.422 | 9.339    | 15.138 | 29.915 |
| 17.9   | -0.181  | 0.370 | 8.954 | 12.538 | 17.945   | 26.330 | 39.754 | -0.598 | 0.420 | 4.740 | 6.436 | 9.359    | 15.173 | 30.011 |
| 18.0   | -0.183  | 0.372 | 8.967 | 12.570 | 18.017   | 26.490 | 40.102 | -0.599 | 0.420 | 4.751 | 6.450 | 9.379    | 15.208 | 30.109 |
| 18.1   | -0.185  | 0.374 | 8.979 | 12.601 | 18.089   | 26.650 | 40.456 | -0.600 | 0.420 | 4.761 | 6.463 | 9.398    | 15.242 | 30.208 |
| 18.2   | -0.187  | 0.376 | 8.989 | 12.630 | 18.160   | 26.811 | 40.814 | -0.601 | 0.420 | 4.771 | 6.476 | 9.417    | 15.277 | 30.308 |
| 18.3   | -0.189  | 0.378 | 8.999 | 12.658 | 18.229   | 26.972 | 41.178 | -0.602 | 0.420 | 4.781 | 6.489 | 9.435    | 15.312 | 30.410 |
| 18.4   | -0.191  | 0.379 | 9.008 | 12.685 | 18.298   | 27.133 | 41.546 | -0.603 | 0.420 | 4.791 | 6.501 | 9.454    | 15.346 | 30.513 |
| 18.5   | -0.193  | 0.381 | 9.015 | 12.711 | 18.366   | 27.296 | 41.920 | -0.604 | 0.420 | 4.800 | 6.513 | 9.472    | 15.381 | 30.617 |
| 18.6   | -0.195  | 0.383 | 9.022 | 12.736 | 18.434   | 27.458 | 42.299 | -0.605 | 0.420 | 4.809 | 6.525 | 9.490    | 15.415 | 30.723 |
| 18.7   | -0.197  | 0.385 | 9.028 | 12.760 | 18.500   | 27.621 | 42.683 | -0.606 | 0.421 | 4.818 | 6.537 | 9.508    | 15.450 | 30.831 |
| 18.8   | -0.199  | 0.387 | 9.032 | 12.783 | 18.566   | 27.785 | 43.073 | -0.607 | 0.421 | 4.827 | 6.548 | 9.525    | 15.484 | 30.940 |
| 18.9   | -0.201  | 0.389 | 9.036 | 12.806 | 18.631   | 27.949 | 43.468 | -0.608 | 0.421 | 4.835 | 6.560 | 9.542    | 15.518 | 31.051 |
| 19.0   | -0.203  | 0.392 | 9.039 | 12.827 | 18.695   | 28.114 | 43.869 | -0.609 | 0.421 | 4.844 | 6.571 | 9.559    | 15.552 | 31.163 |
| 19.1   | -0.205  | 0.394 | 9.042 | 12.847 | 18.759   | 28.280 | 44.276 | -0.610 | 0.421 | 4.852 | 6.582 | 9.576    | 15.587 | 31.276 |
| 19.2   | -0.207  | 0.396 | 9.044 | 12.866 | 18.822   | 28.446 | 44.688 | -0.612 | 0.422 | 4.860 | 6.592 | 9.593    | 15.621 | 31.392 |
| 19.3   | -0.209  | 0.398 | 9.045 | 12.885 | 18.884   | 28.613 | 45.106 | -0.613 | 0.422 | 4.867 | 6.603 | 9.609    | 15.655 | 31.509 |
| 19.4   | -0.211  | 0.400 | 9.045 | 12.903 | 18.946   | 28.781 | 45.531 | -0.614 | 0.422 | 4.875 | 6.613 | 9.625    | 15.690 | 31.628 |
| 19.5   | -0.213  | 0.402 | 9.045 | 12.920 | 19.007   | 28.949 | 45.962 | -0.615 | 0.422 | 4.882 | 6.623 | 9.642    | 15.724 | 31.749 |
| 19.6   | -0.216  | 0.405 | 9.044 | 12.937 | 19.068   | 29.119 | 46.399 | -0.616 | 0.423 | 4.890 | 6.633 | 9.658    | 15.759 | 31.872 |
| 19.7   | -0.218  | 0.407 | 9.043 | 12.953 | 19.129   | 29.289 | 46.843 | -0.617 | 0.423 | 4.897 | 6.643 | 9.674    | 15.793 | 31.997 |
| 19.8   | -0.220  | 0.409 | 9.041 | 12.968 | 19.188   | 29.460 | 47.293 | -0.618 | 0.423 | 4.904 | 6.652 | 9.689    | 15.828 | 32.125 |
| 19.9   | -0.222  | 0.411 | 9.038 | 12.983 | 19.248   | 29.632 | 47.750 | -0.619 | 0.424 | 4.911 | 6.662 | 9.705    | 15.864 | 32.255 |
| 20.0   | -0.224  | 0.414 | 9.036 | 12.997 | 19.307   | 29.805 | 48.214 | -0.620 | 0.424 | 4.917 | 6.671 | 9.721    | 15.899 | 32.387 |
